# Supplementary material
Source: Research Square preprint supplement (doi:10.21203/rs.3.rs-10305653/v1)

**California HS Science Practice Test**


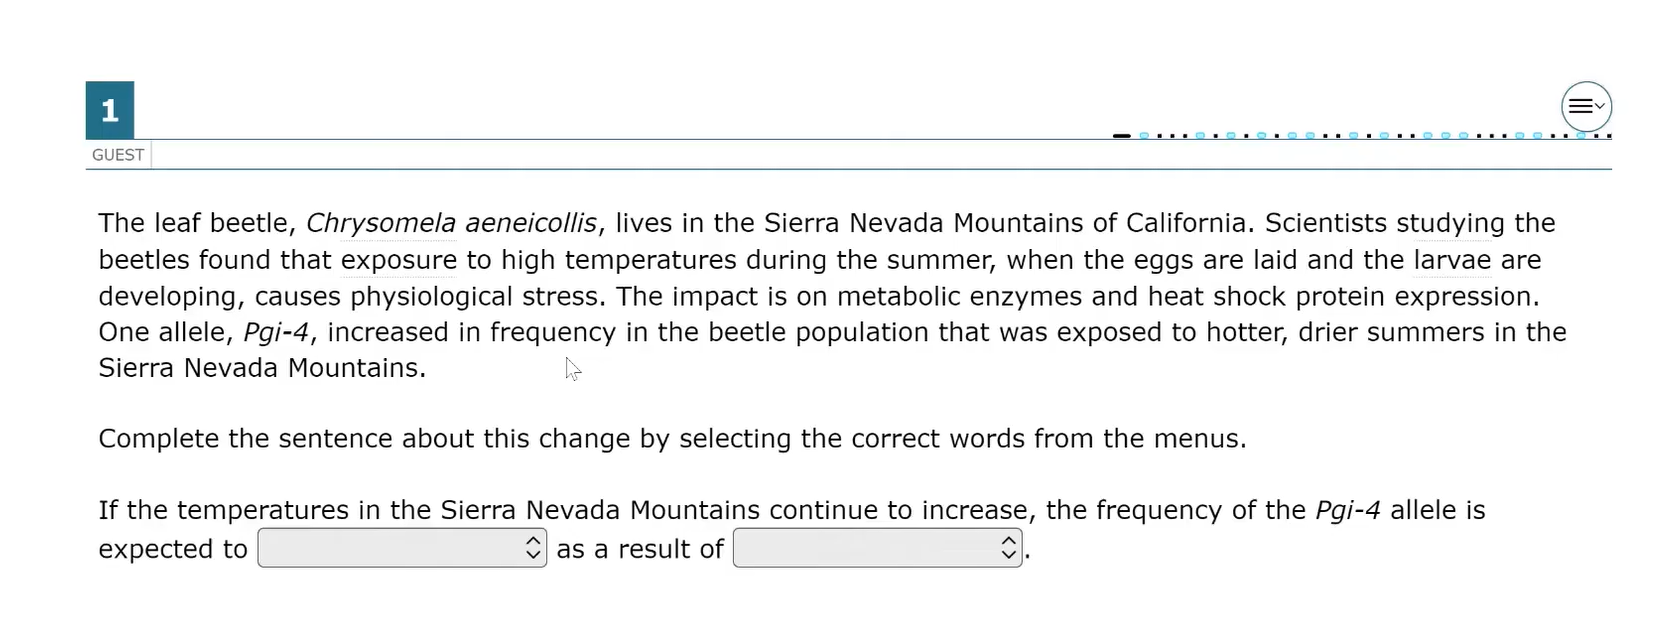

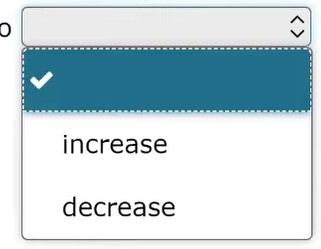

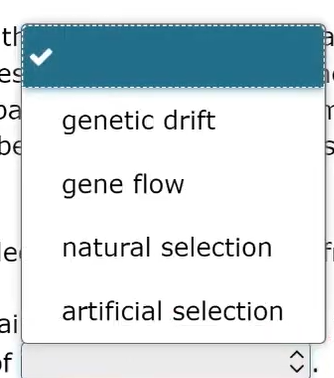


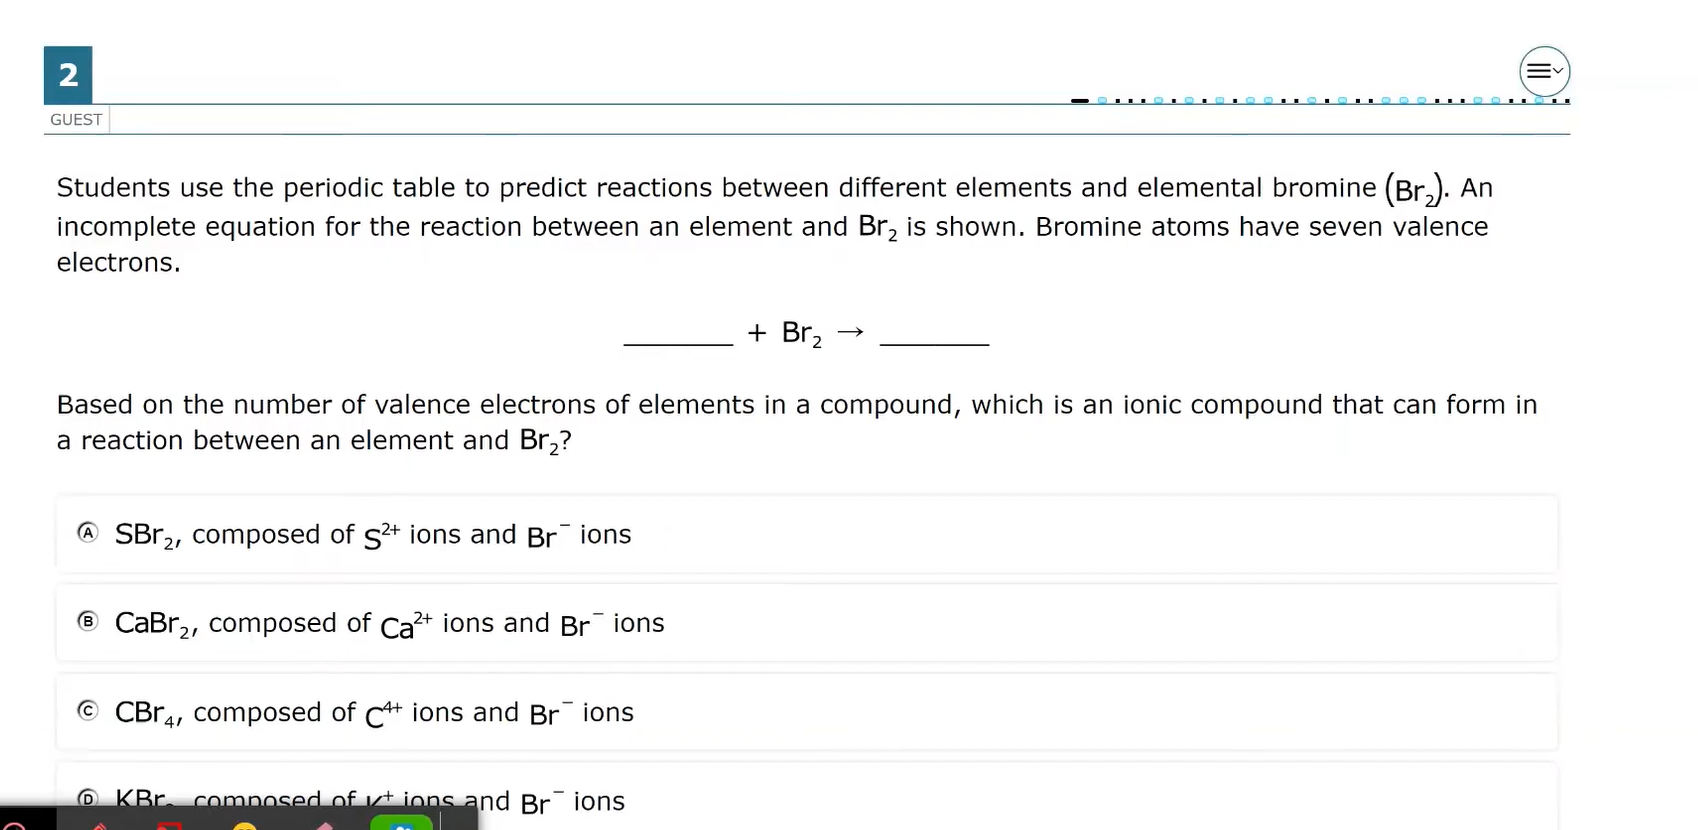


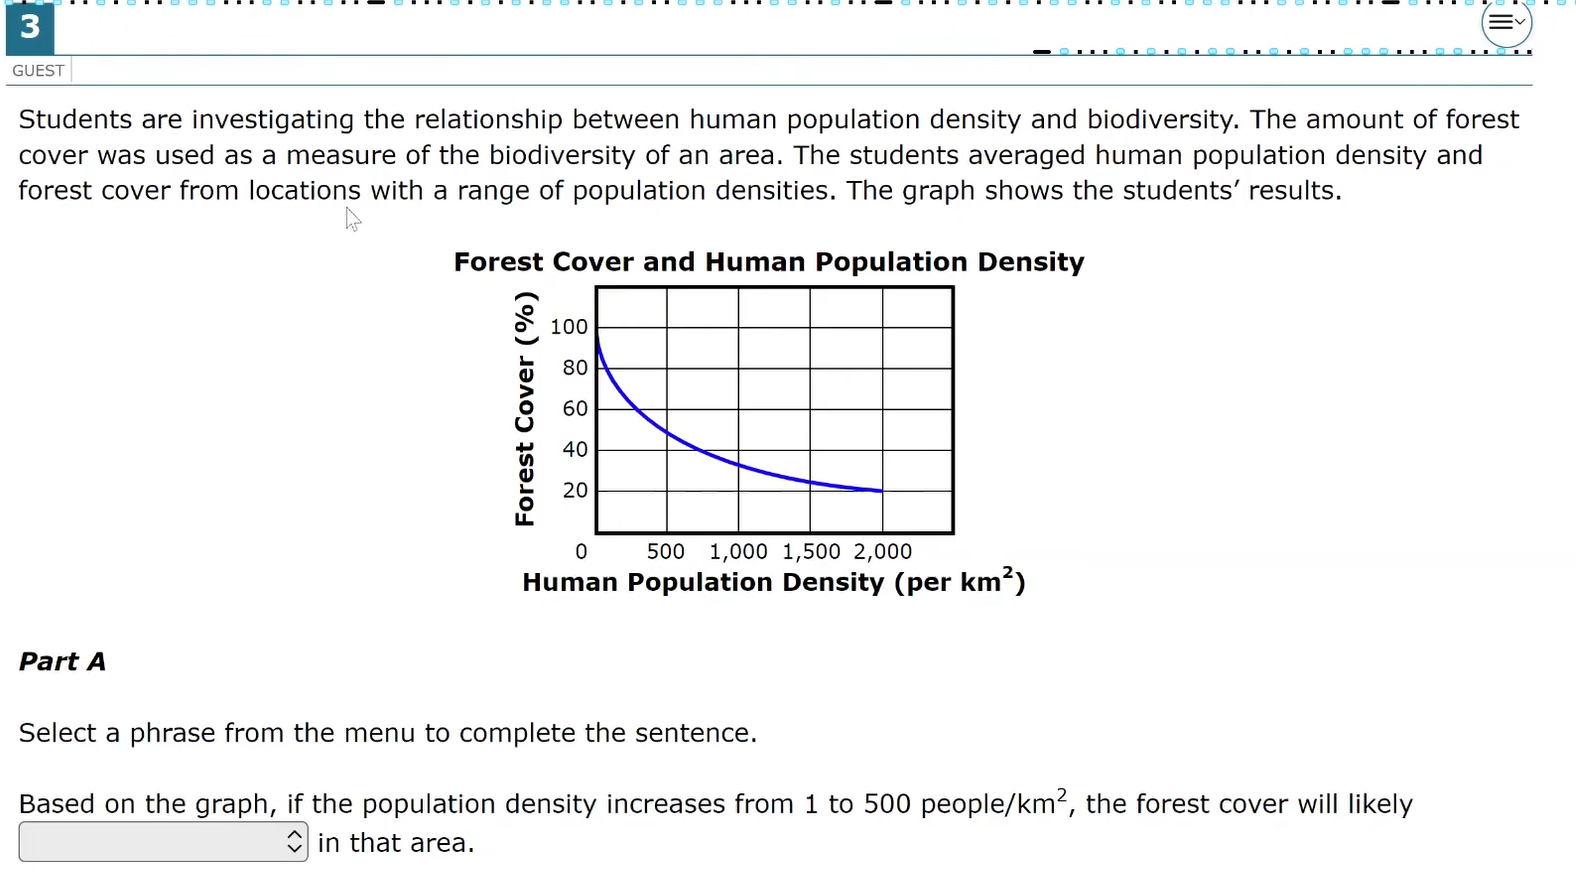

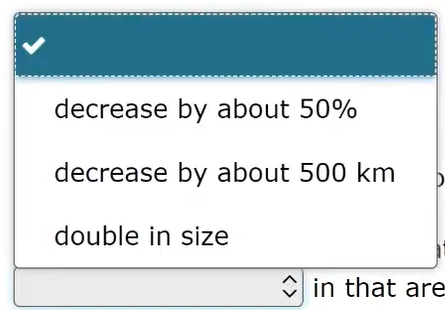


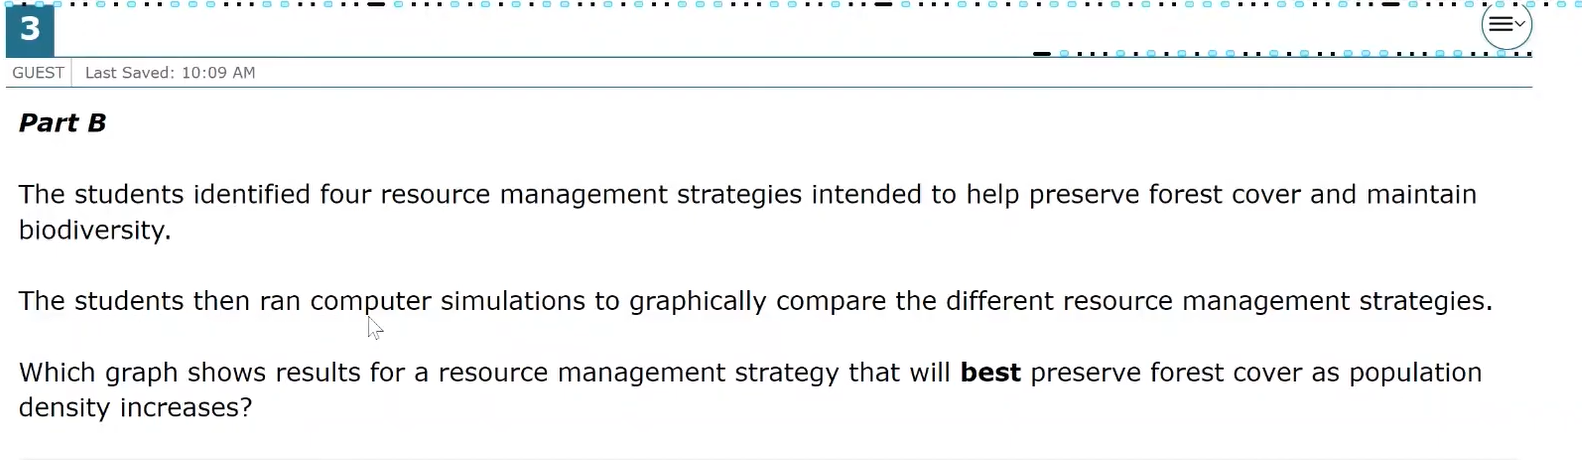


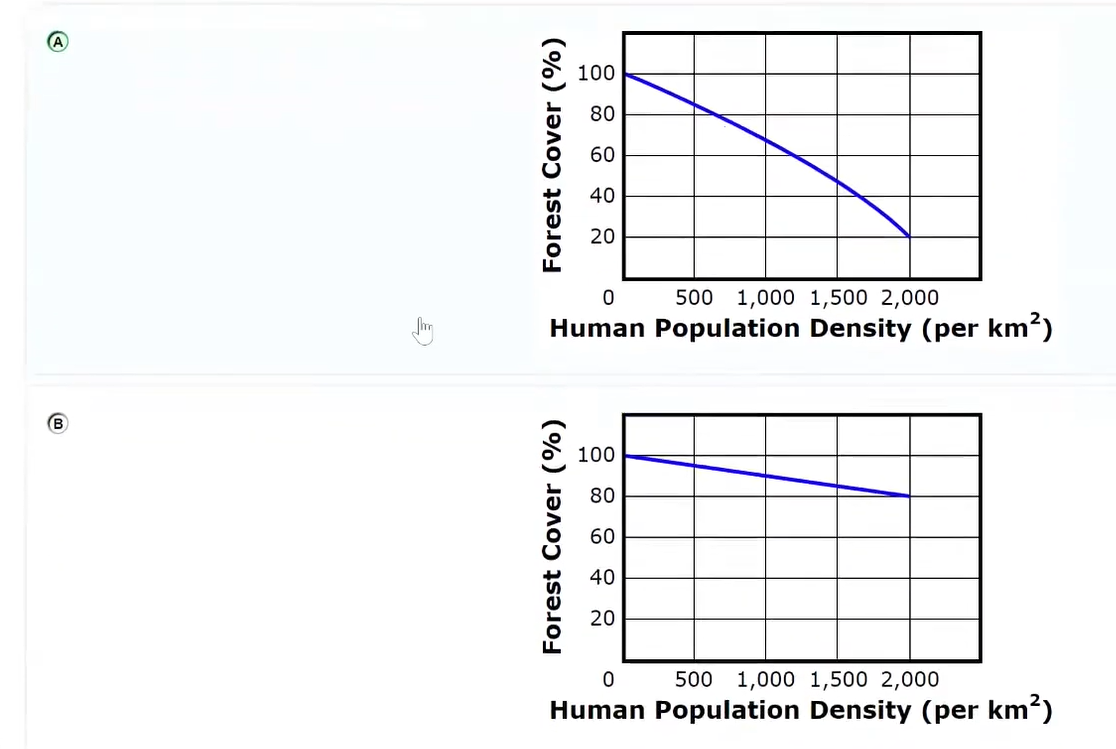


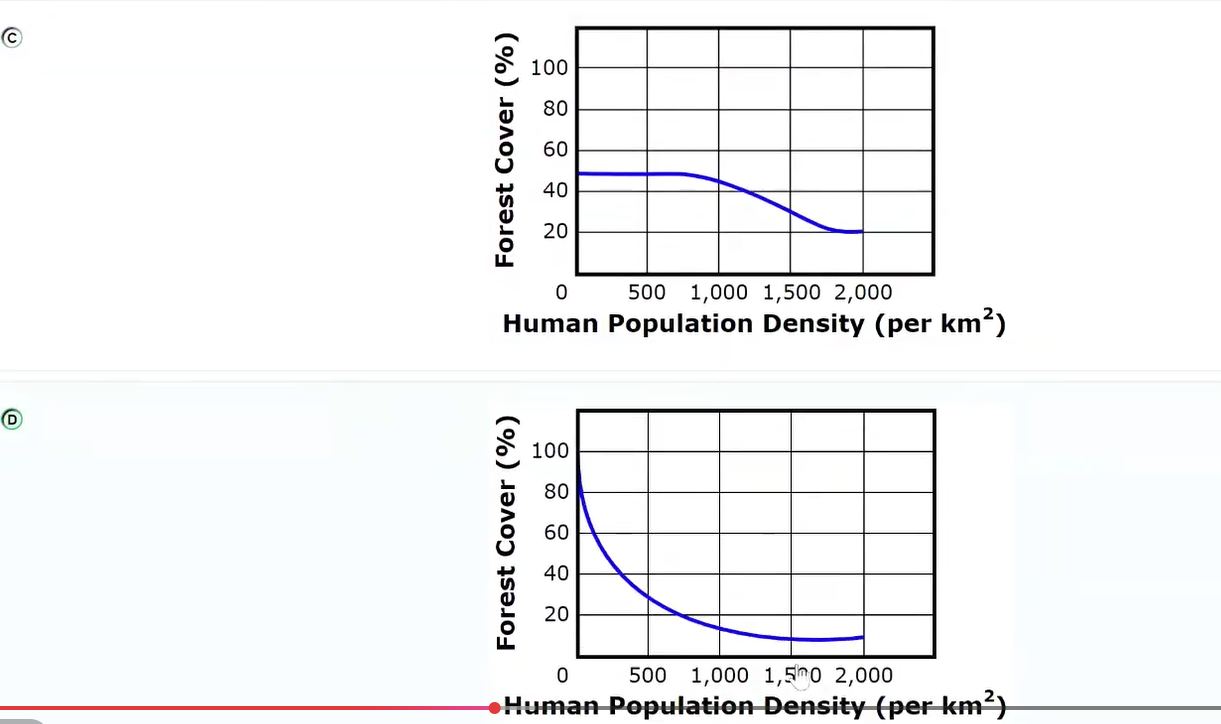


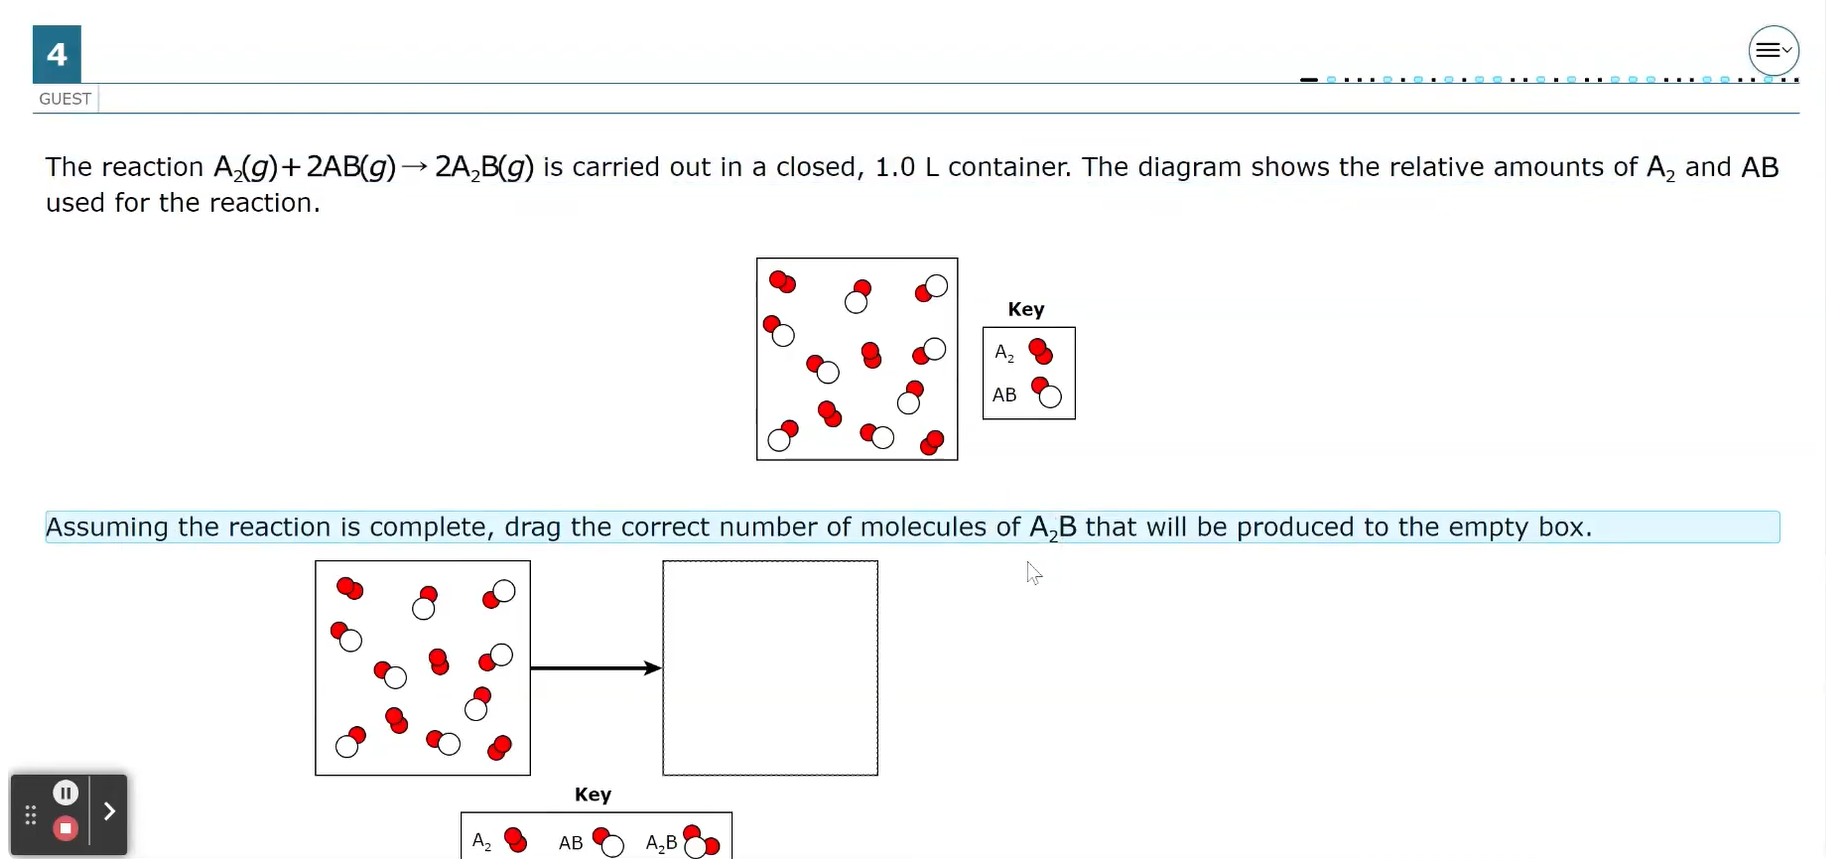


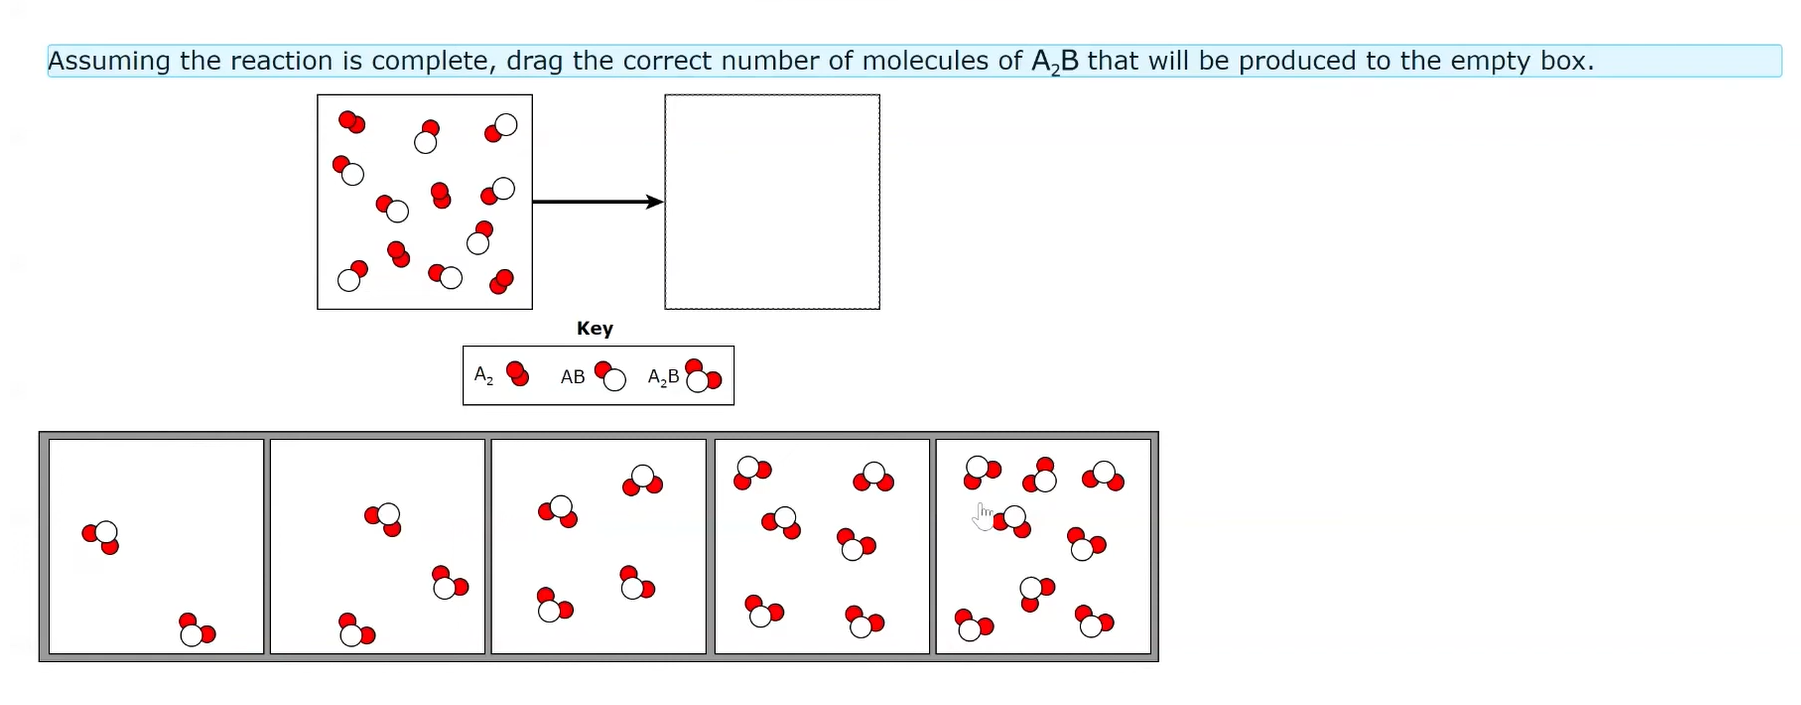


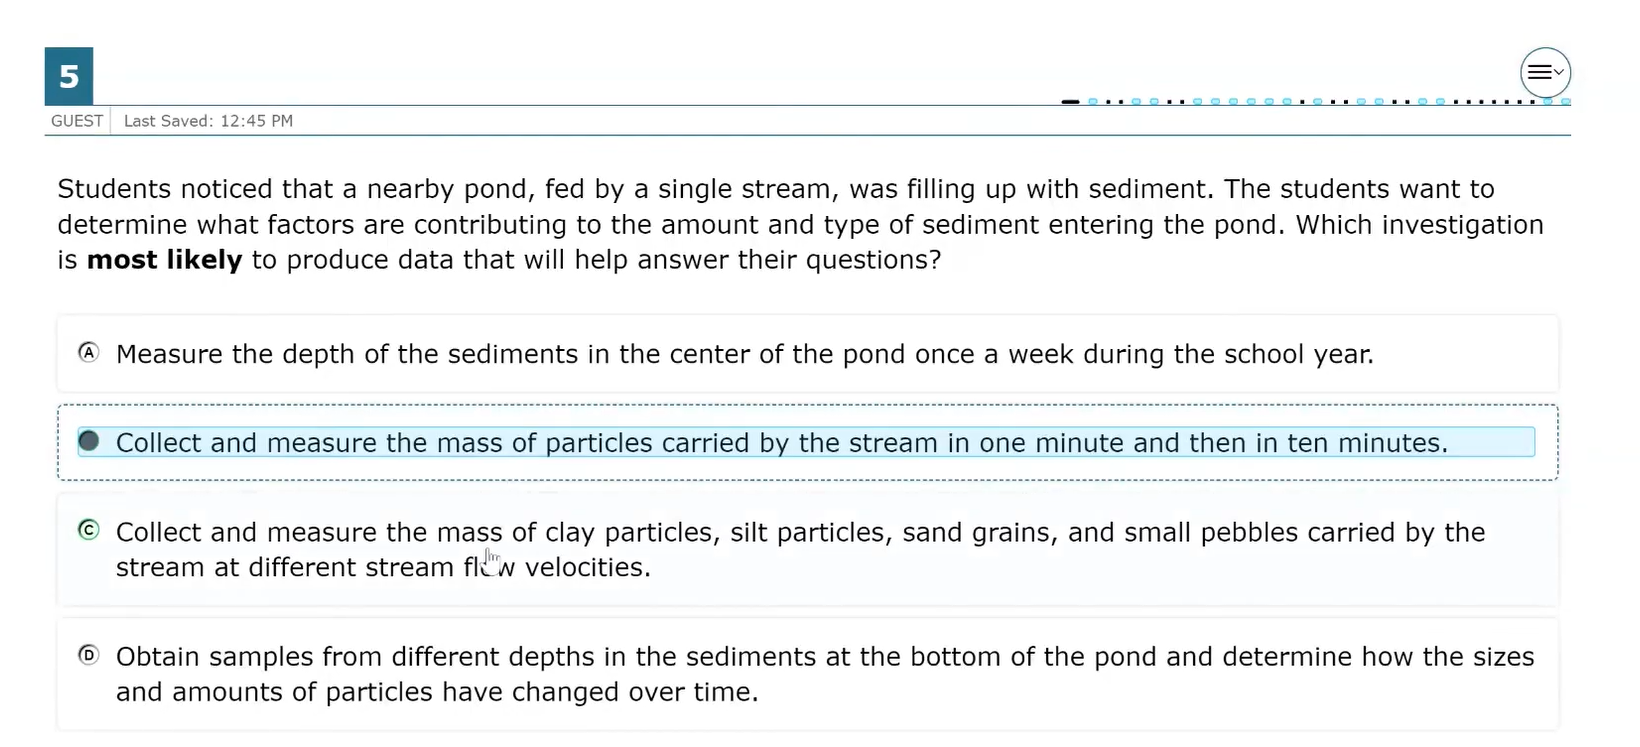


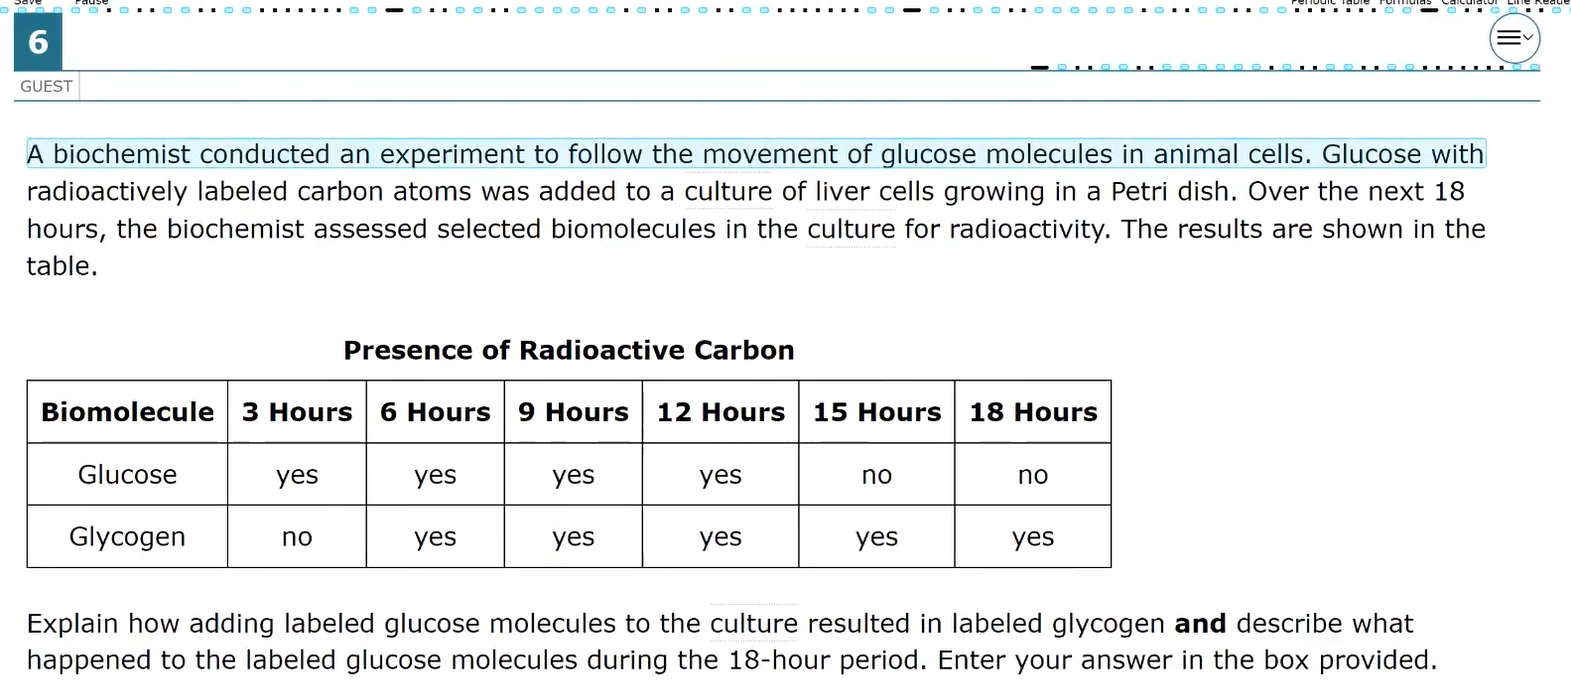


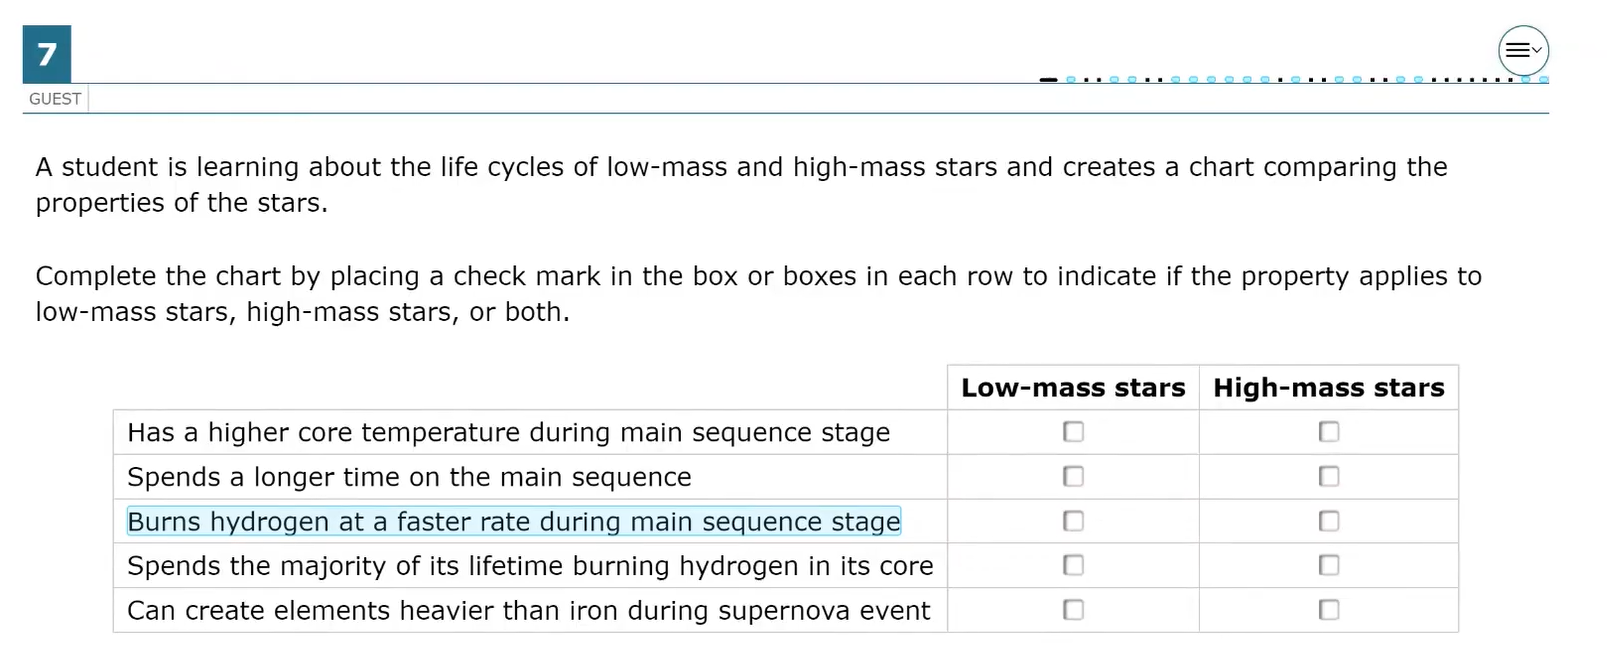


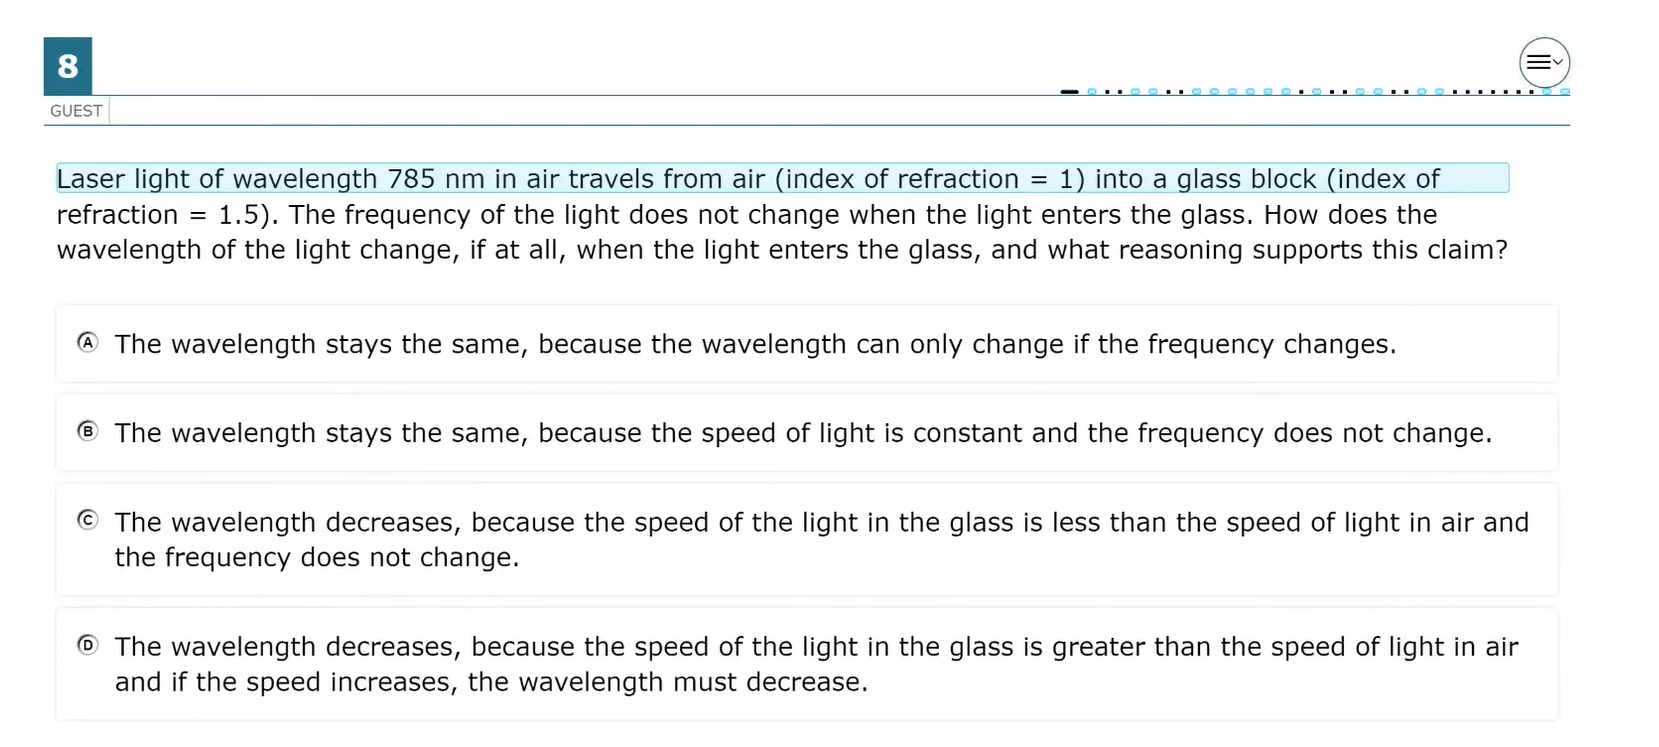


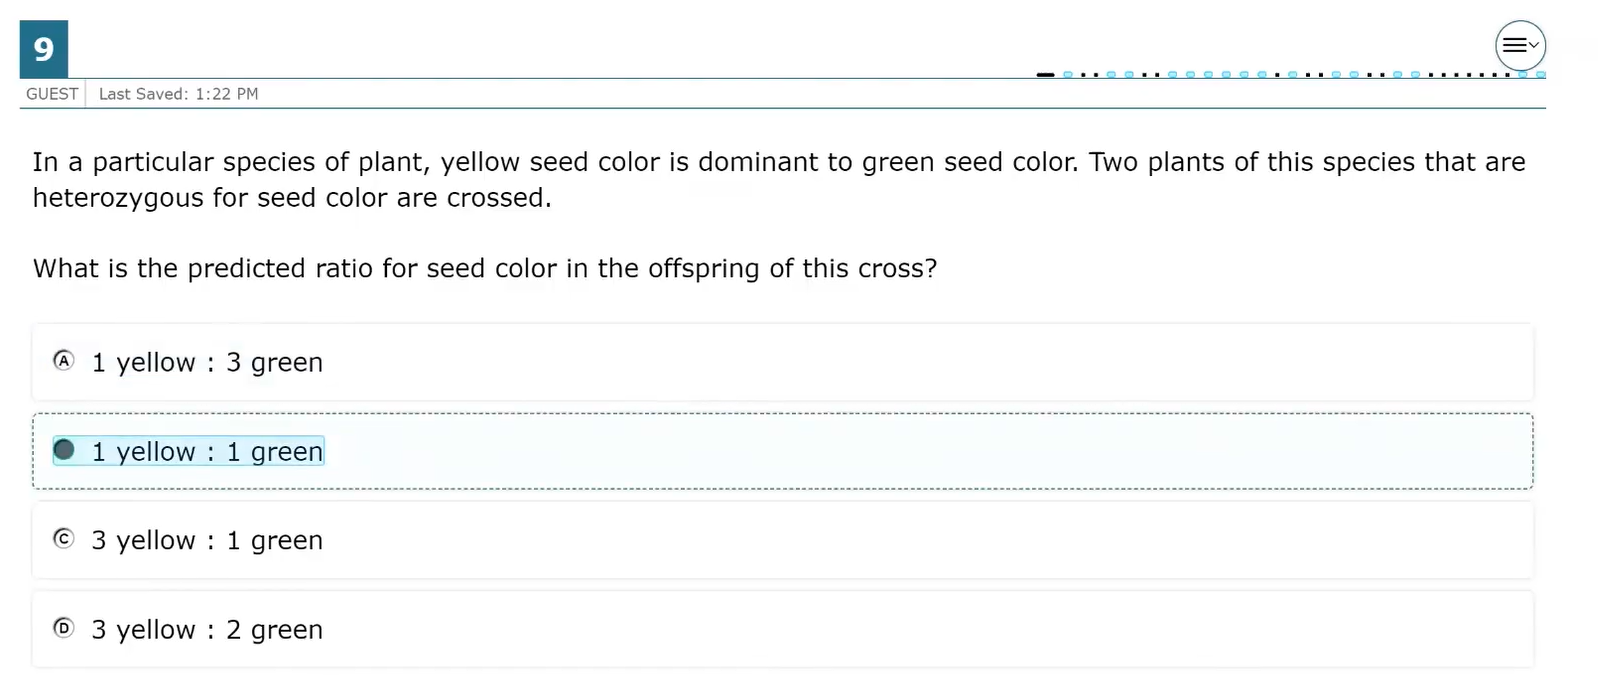


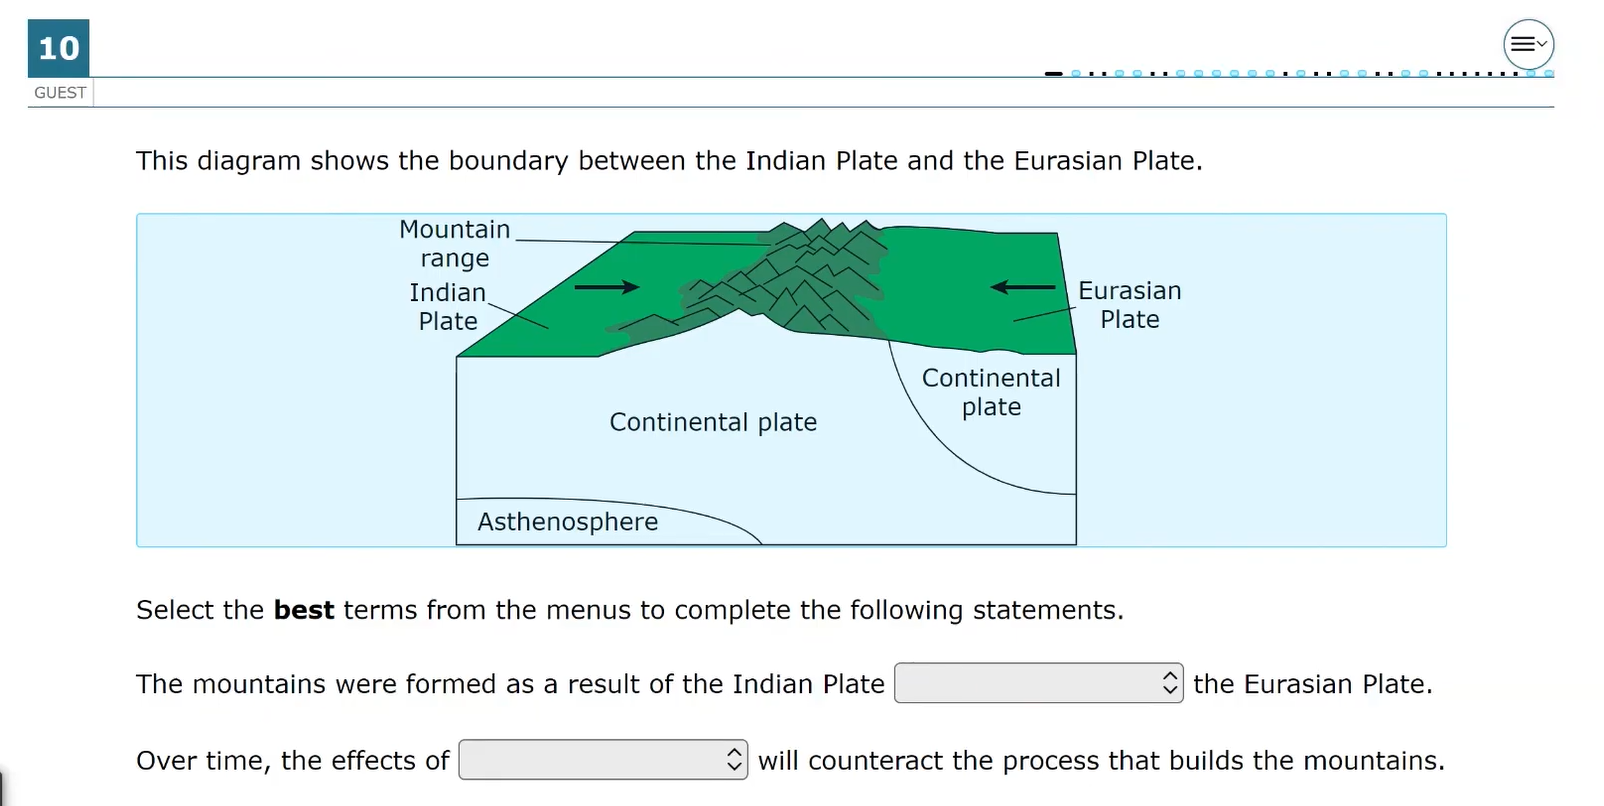


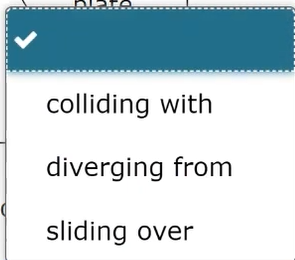

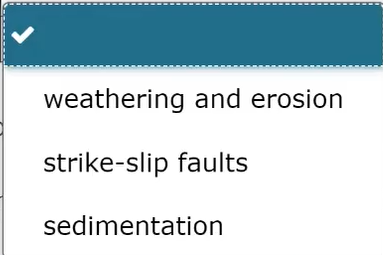


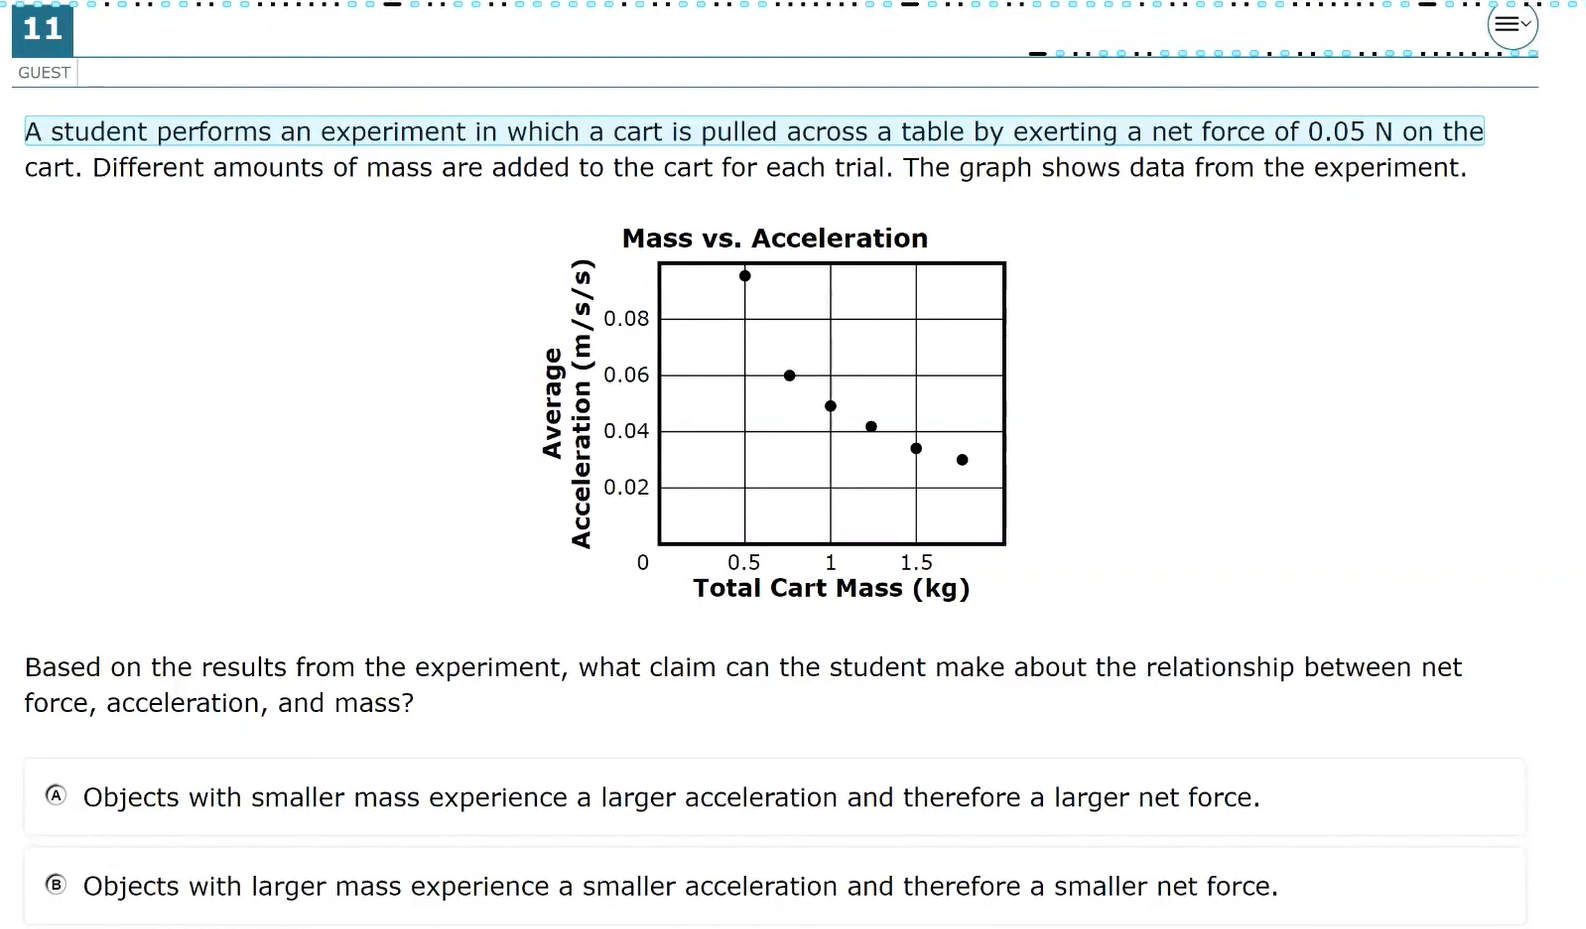


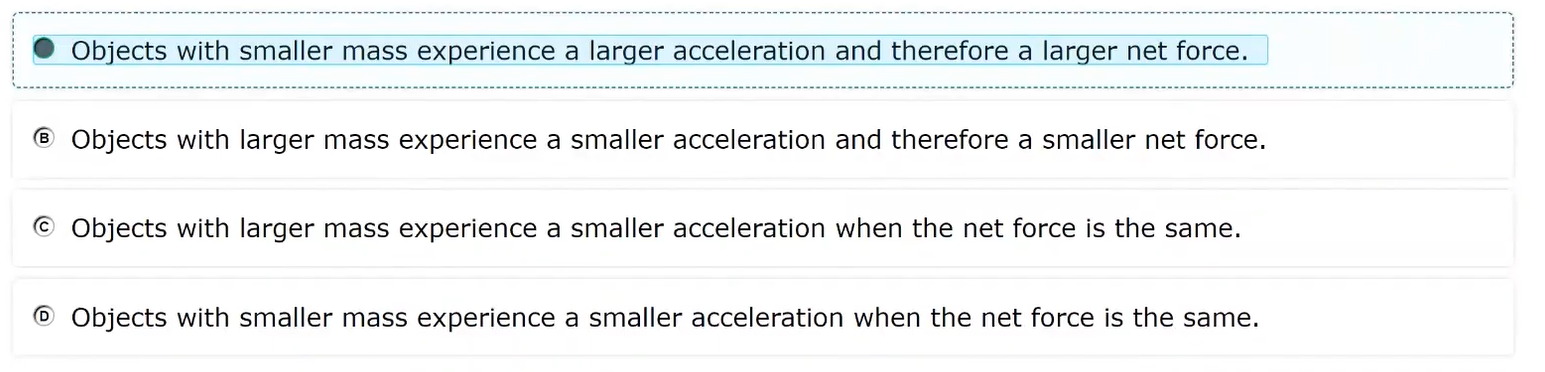


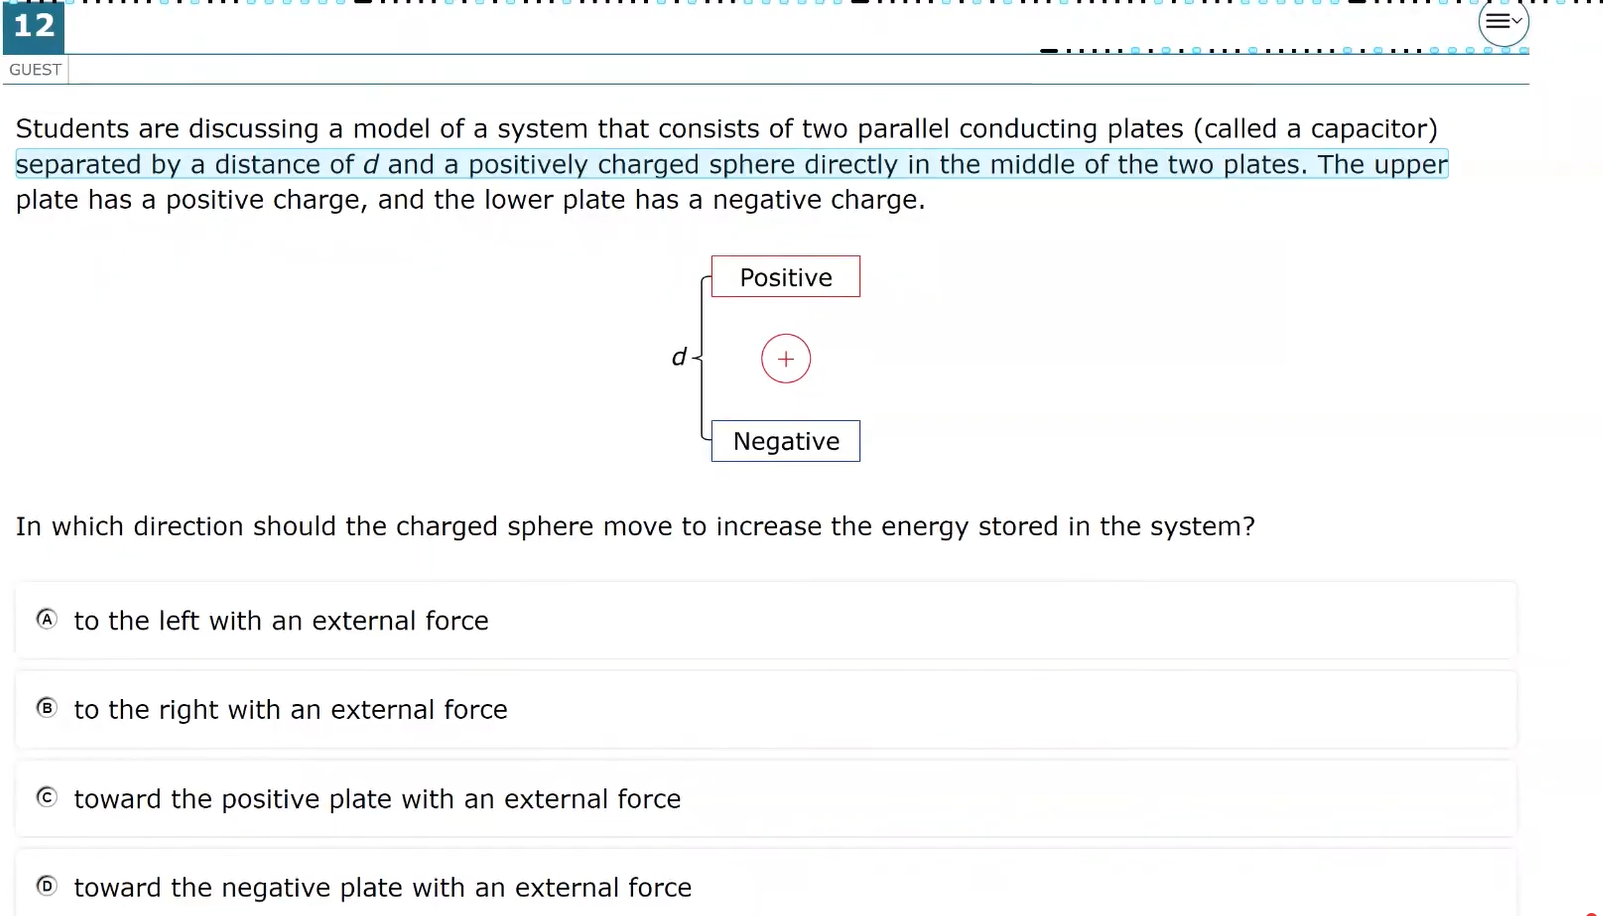


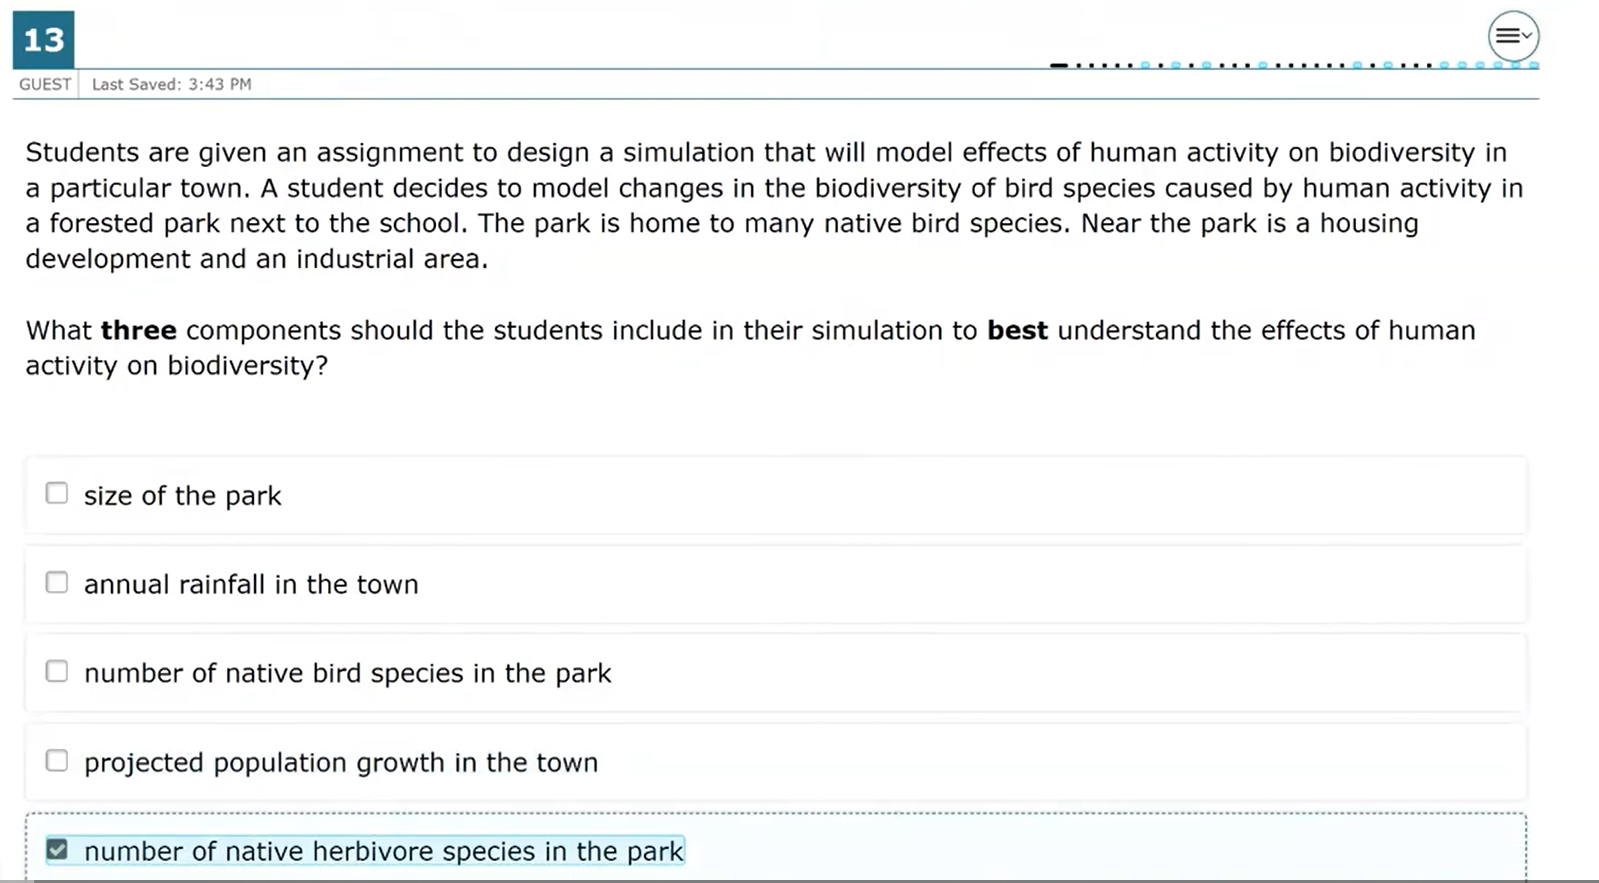


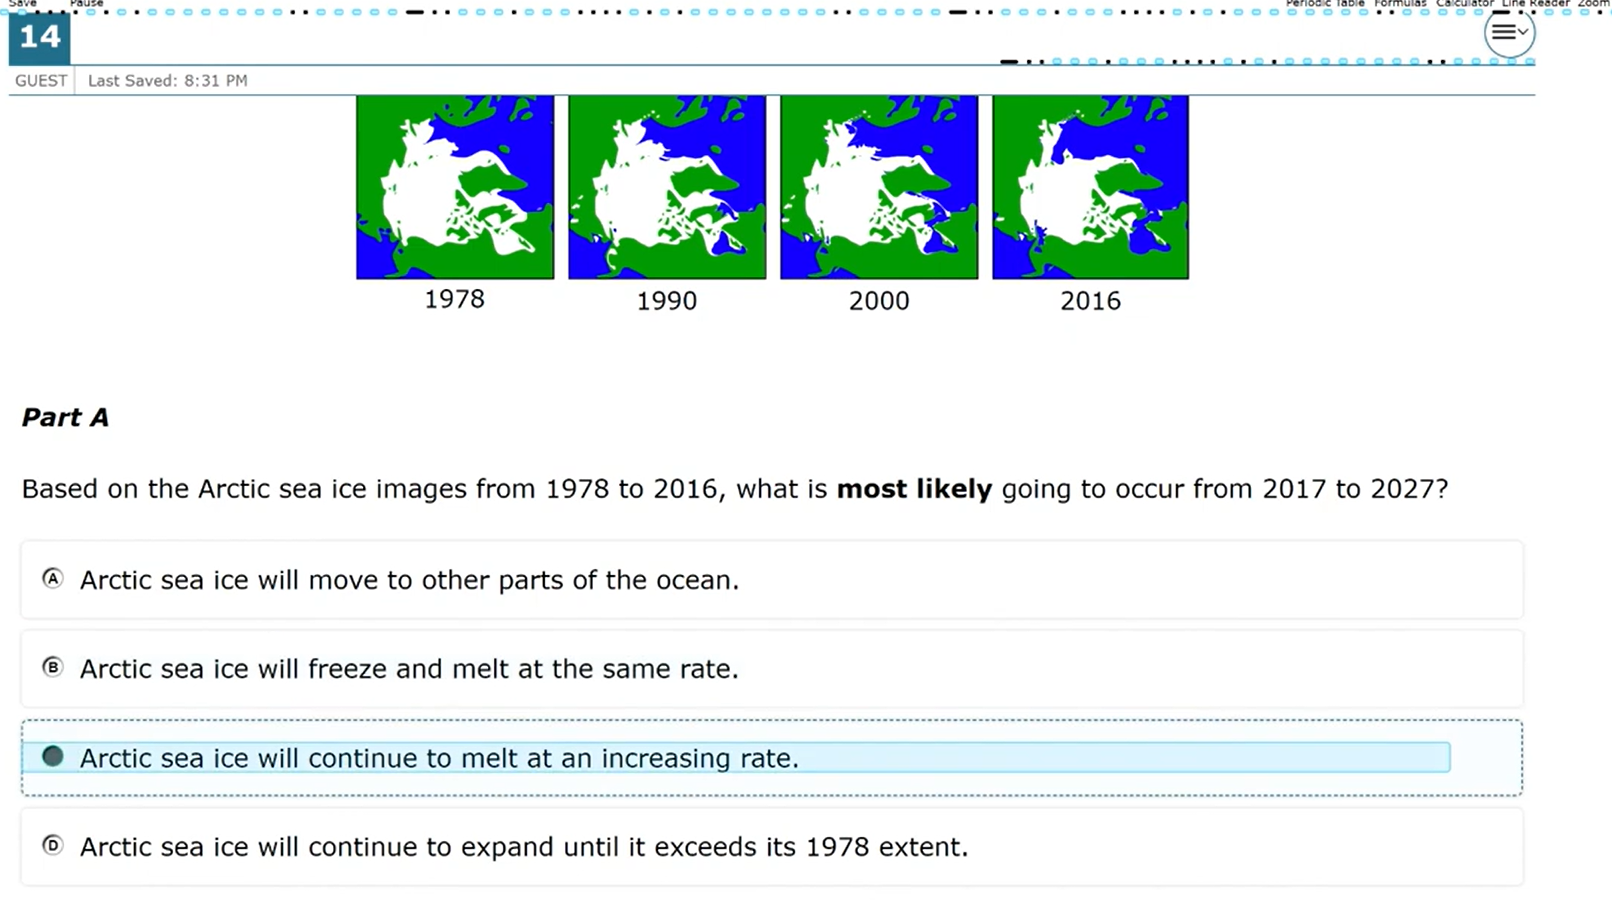


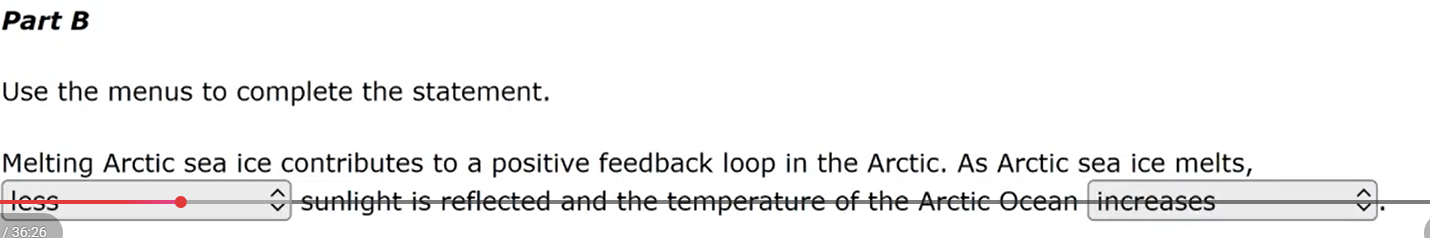


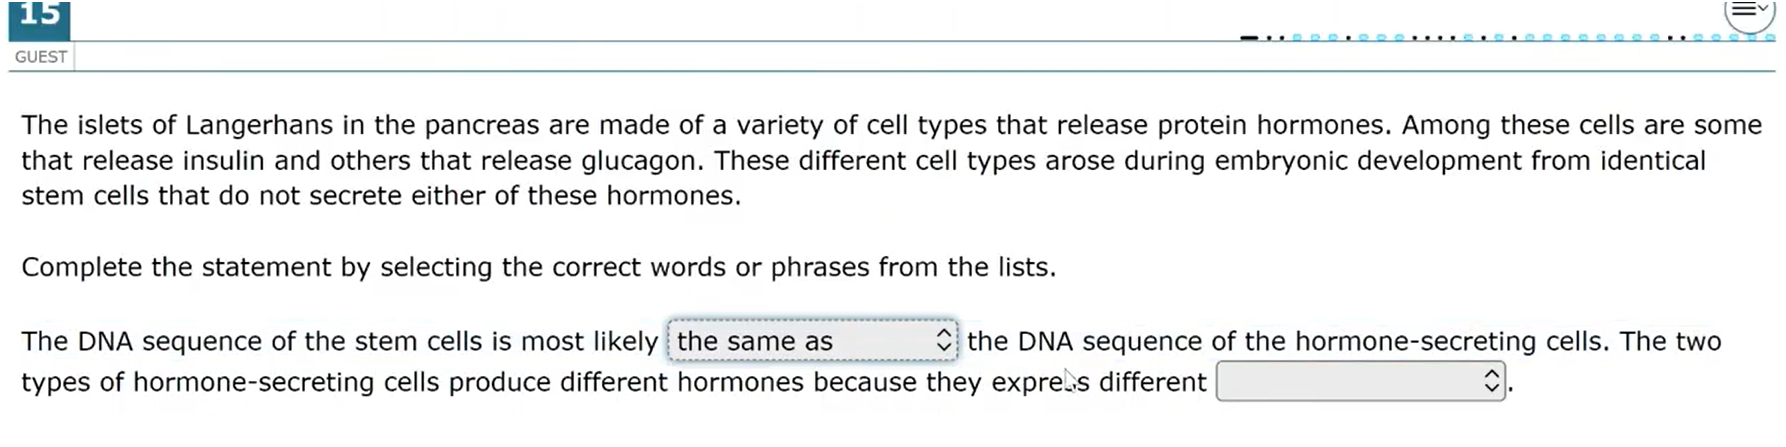

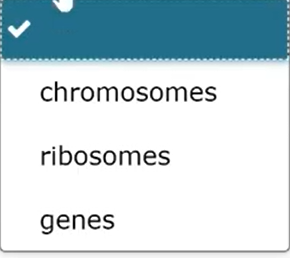


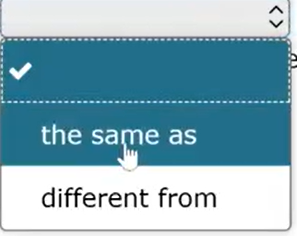


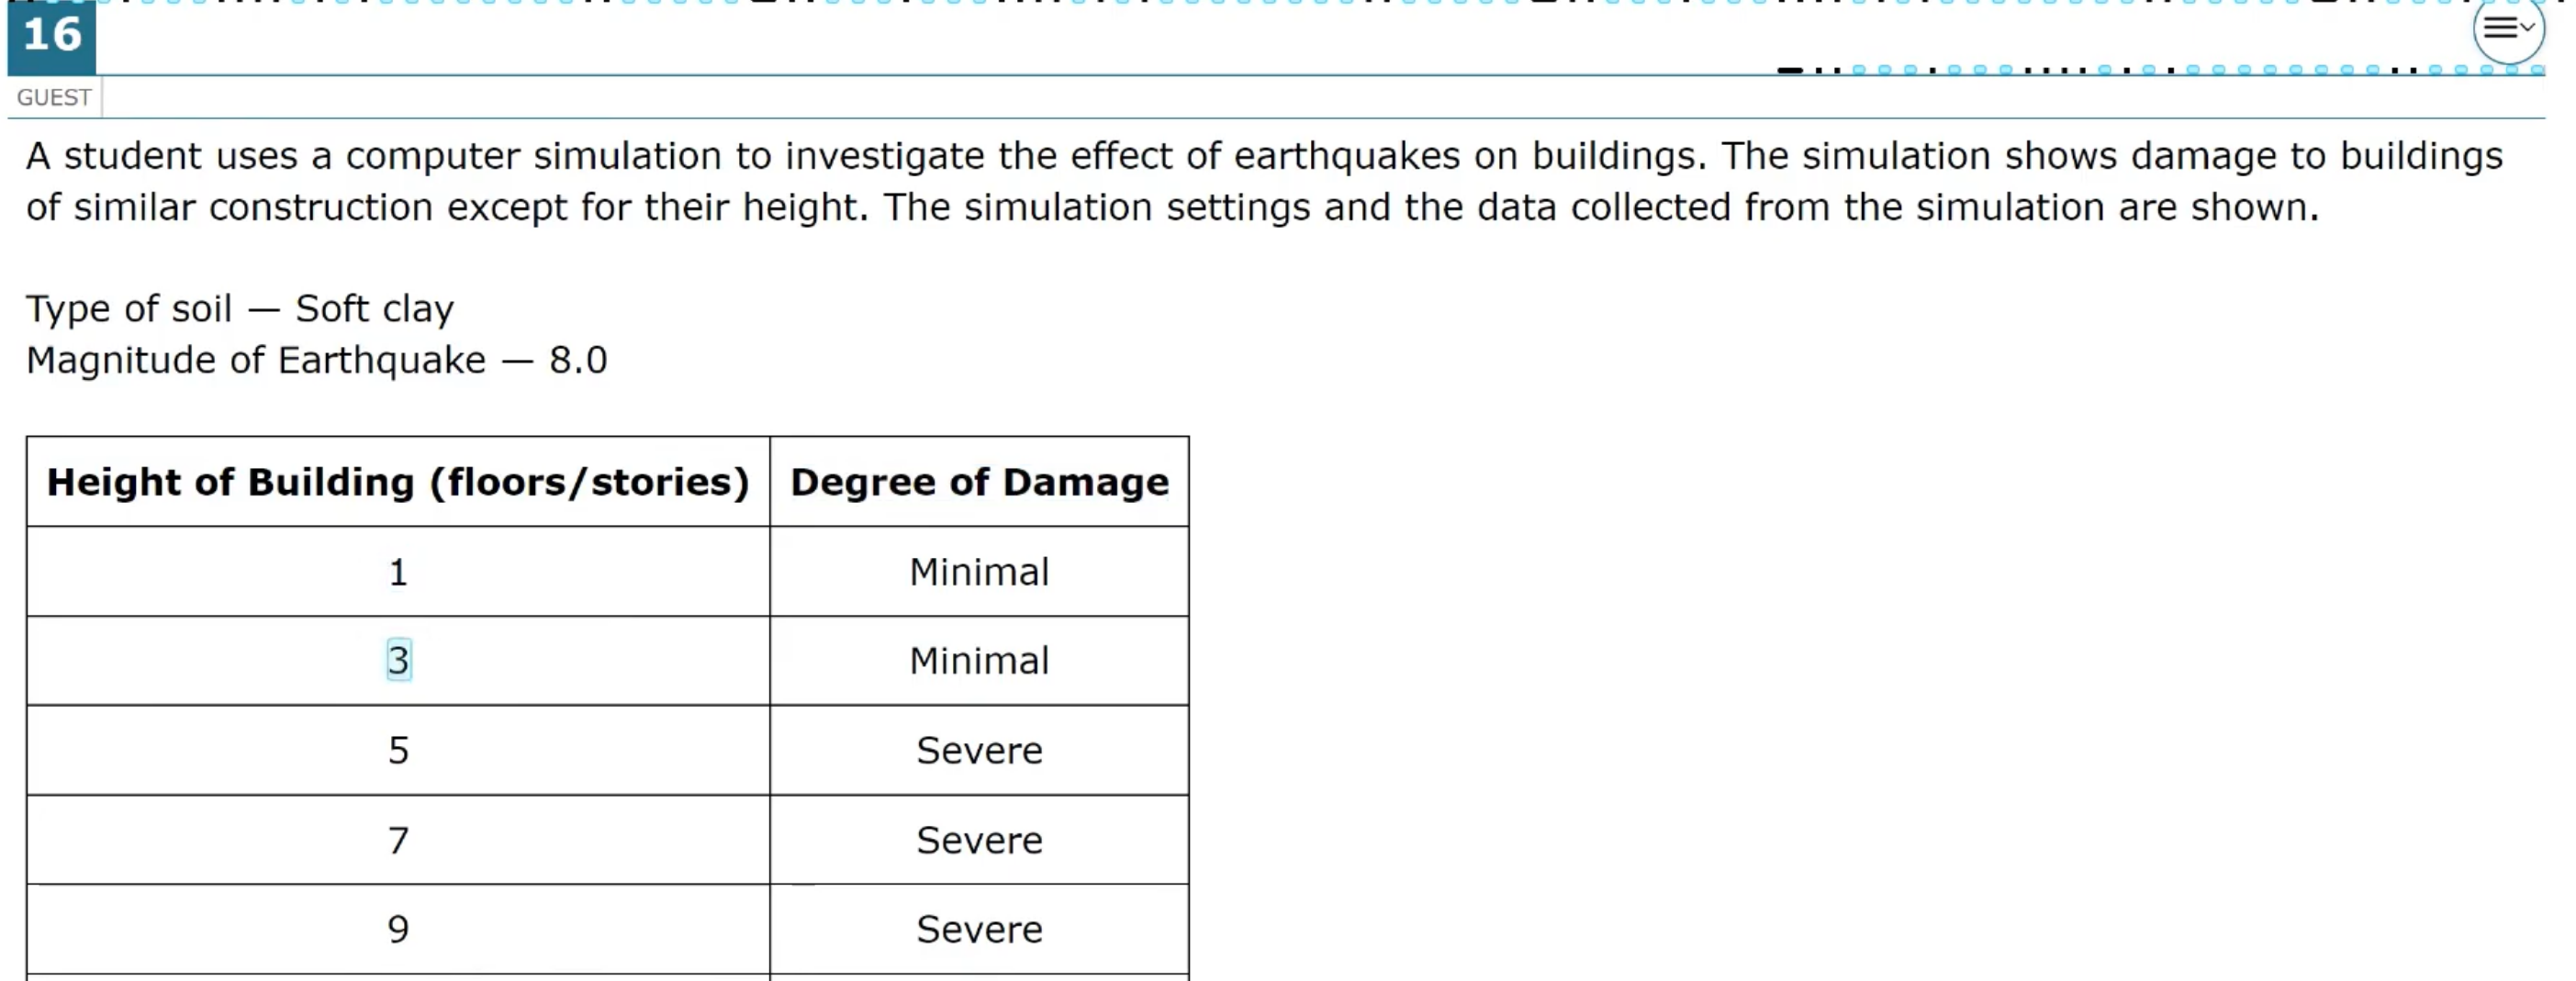


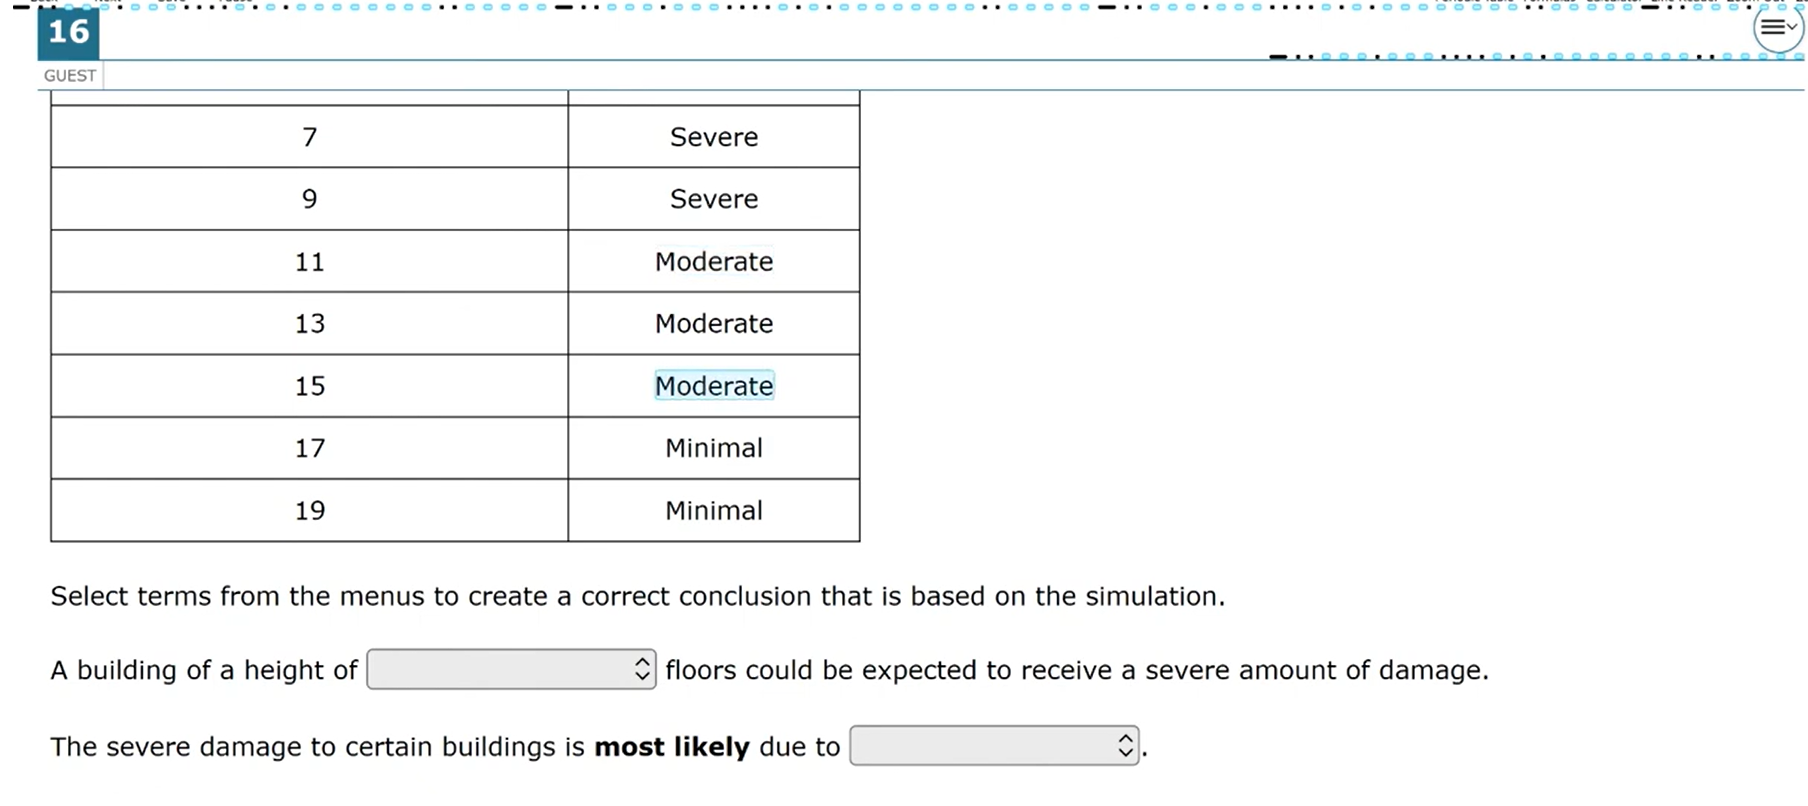


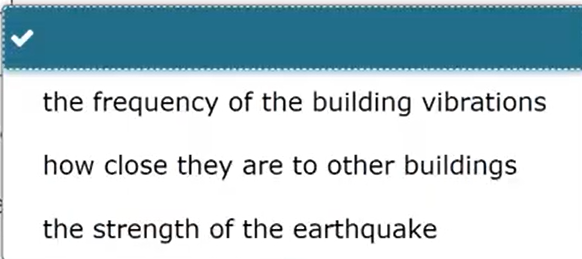


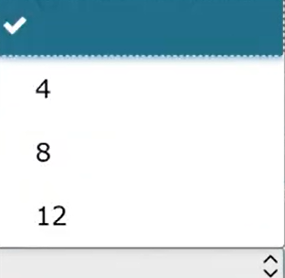


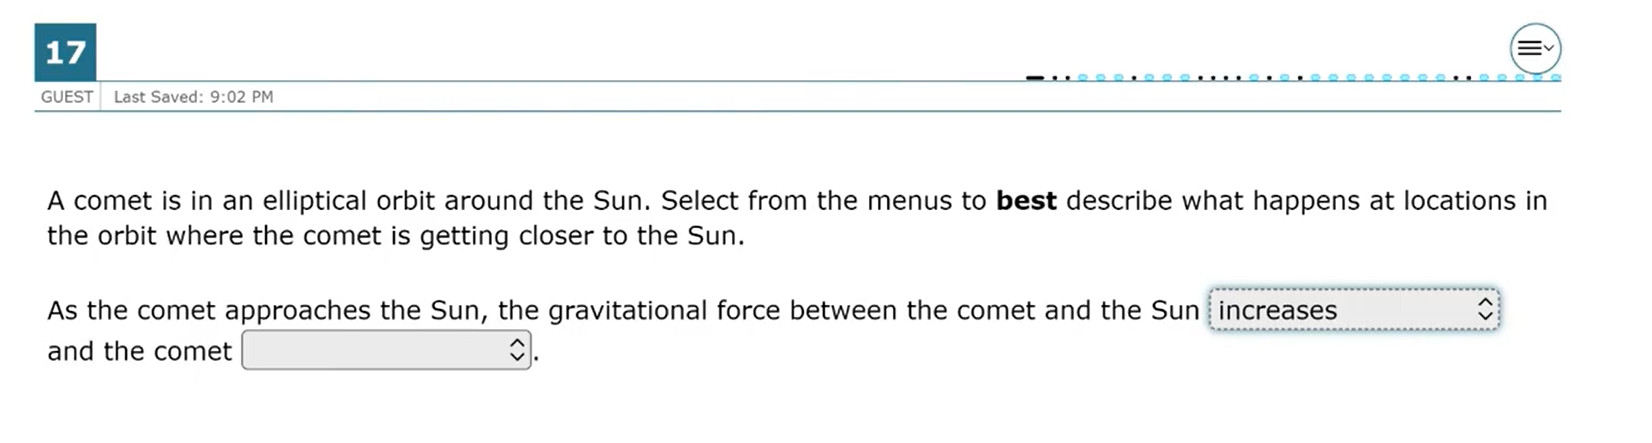

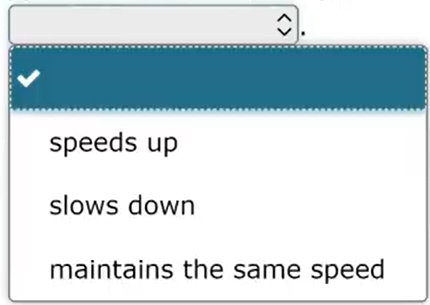

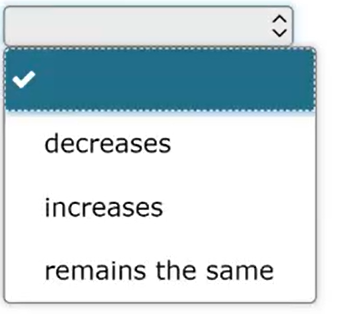


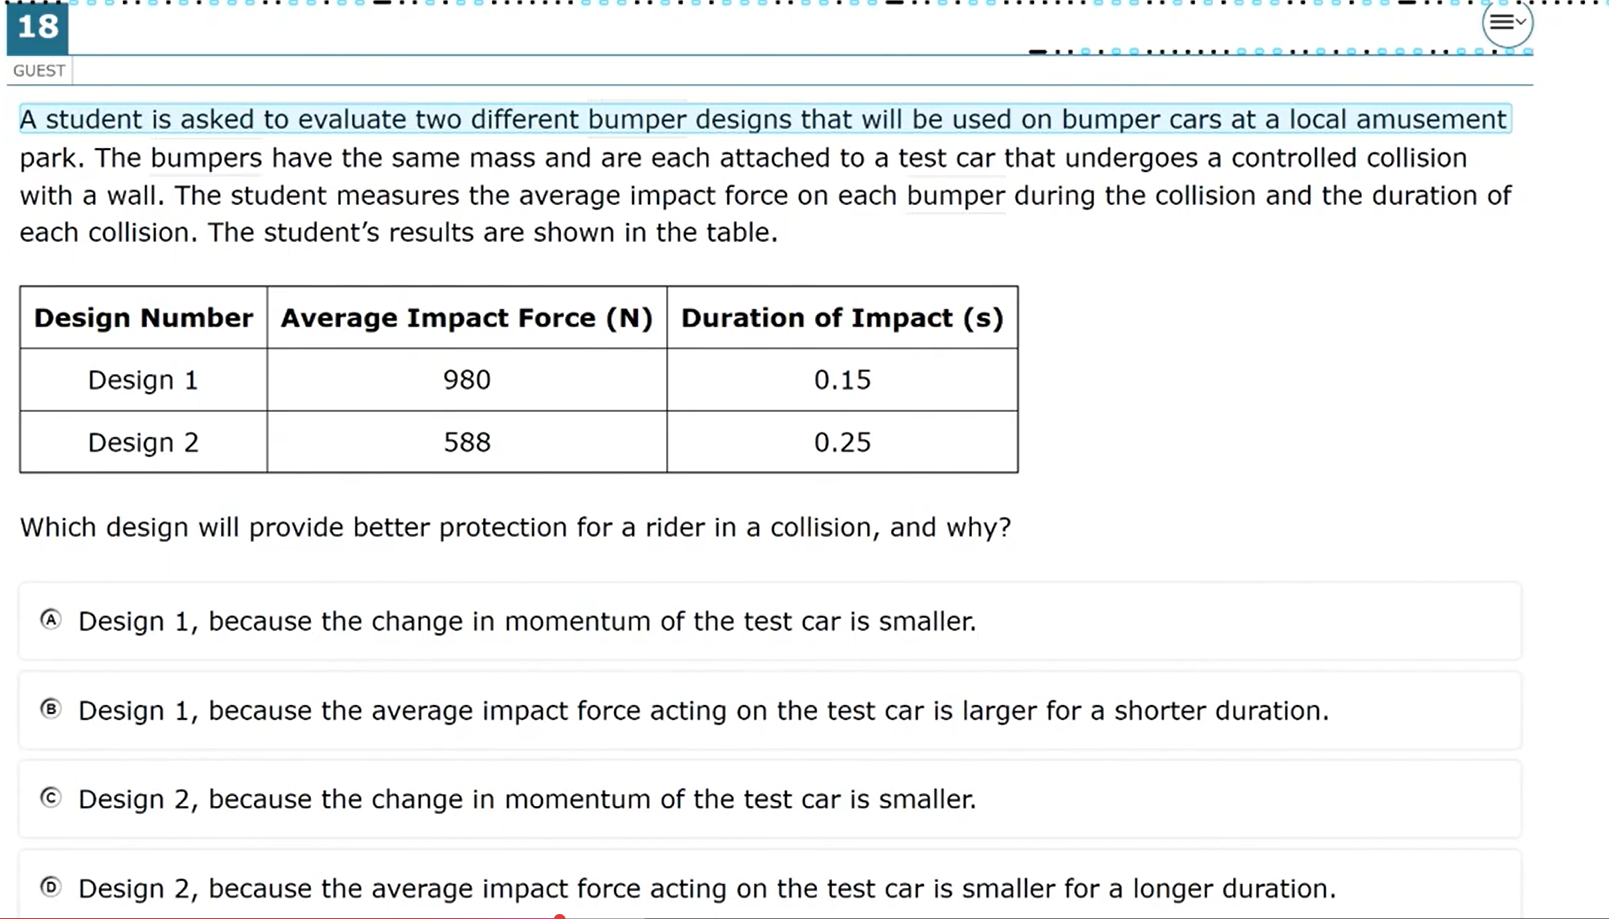


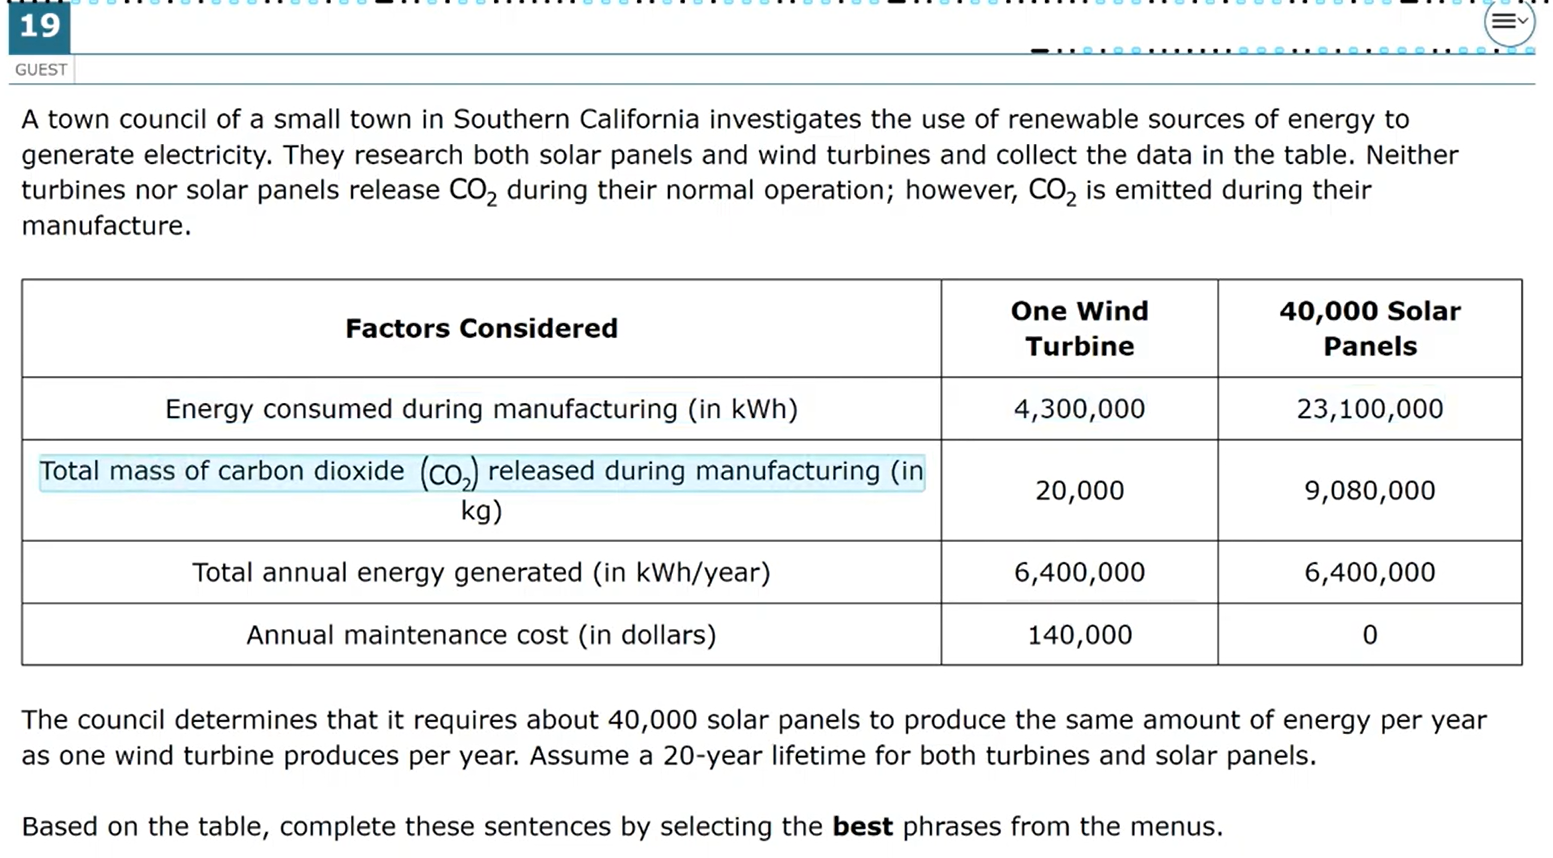


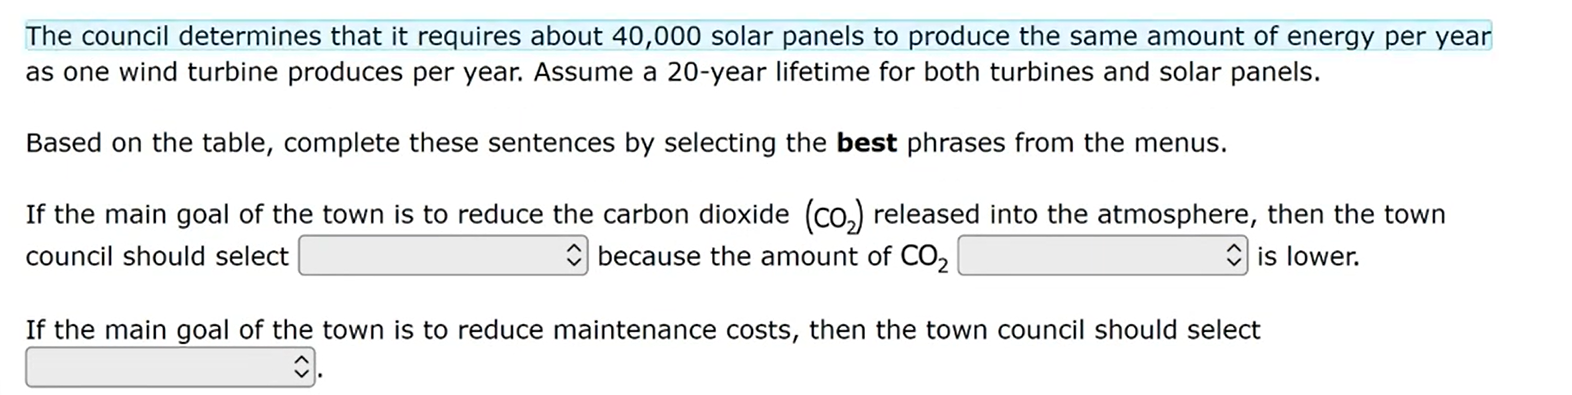


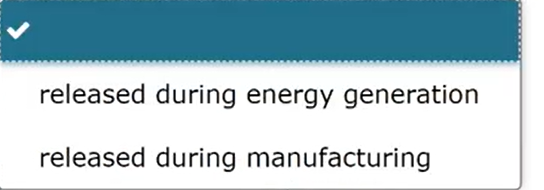

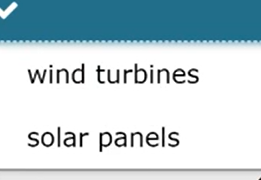

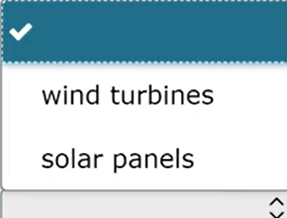


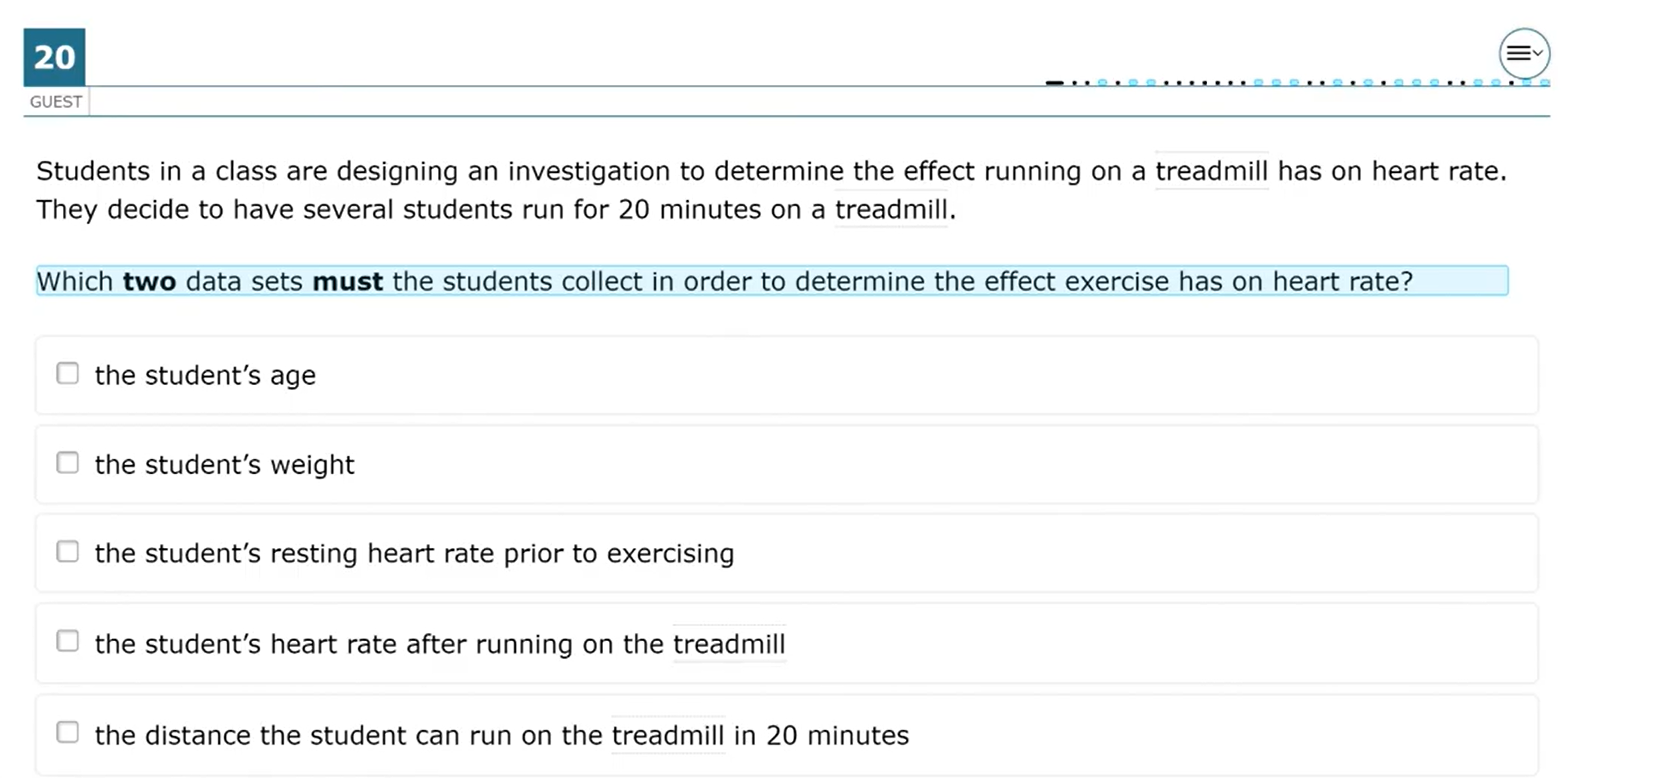


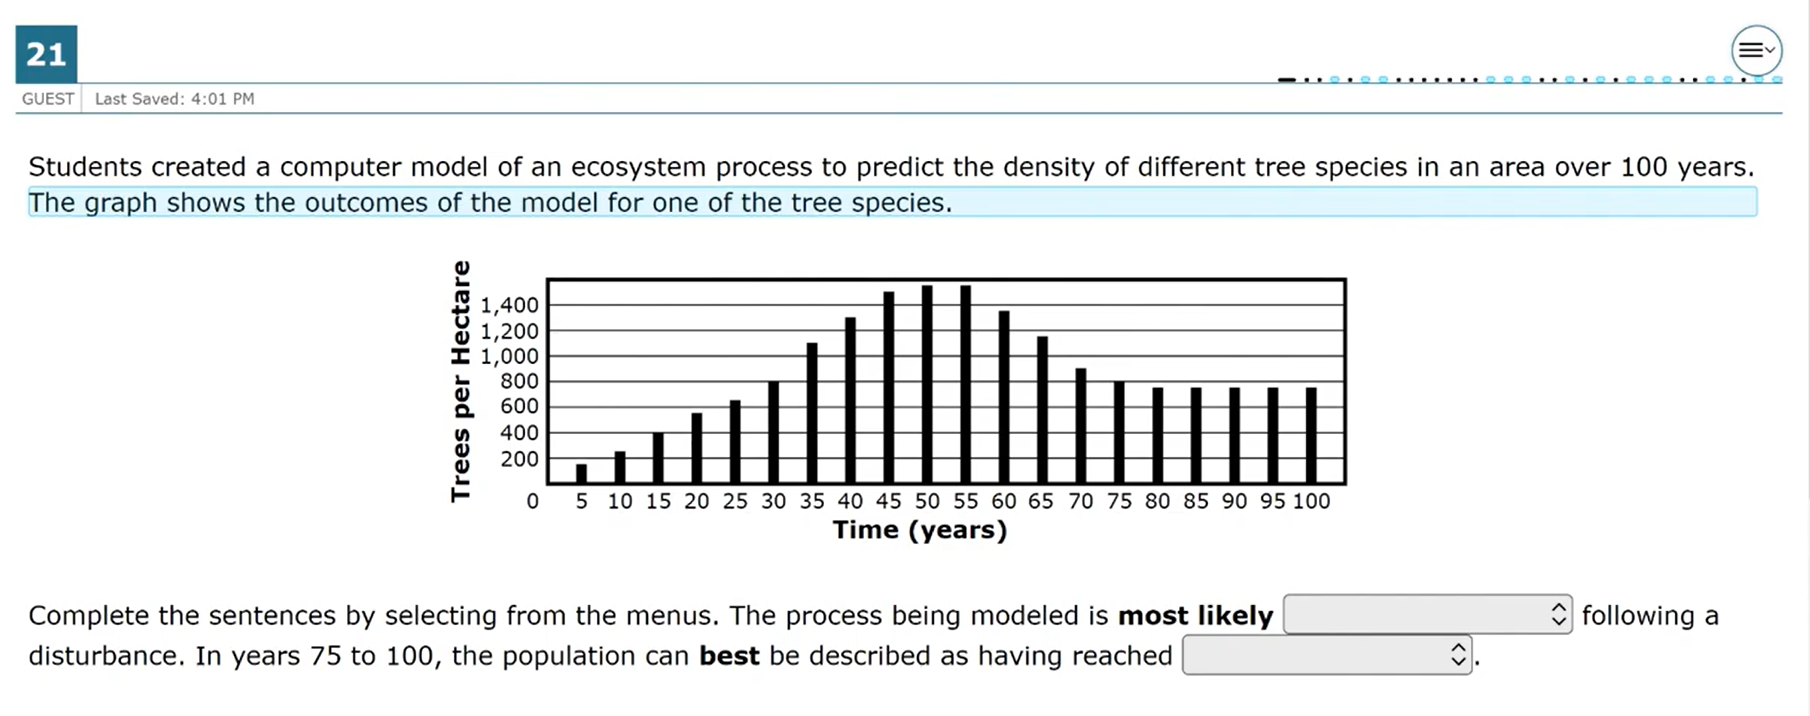

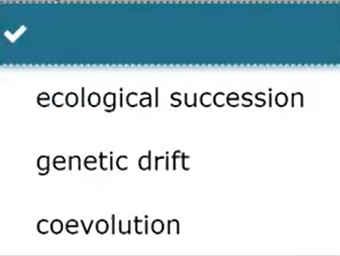

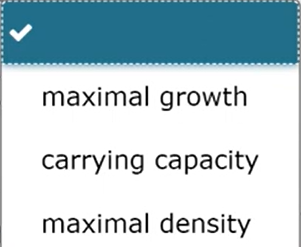


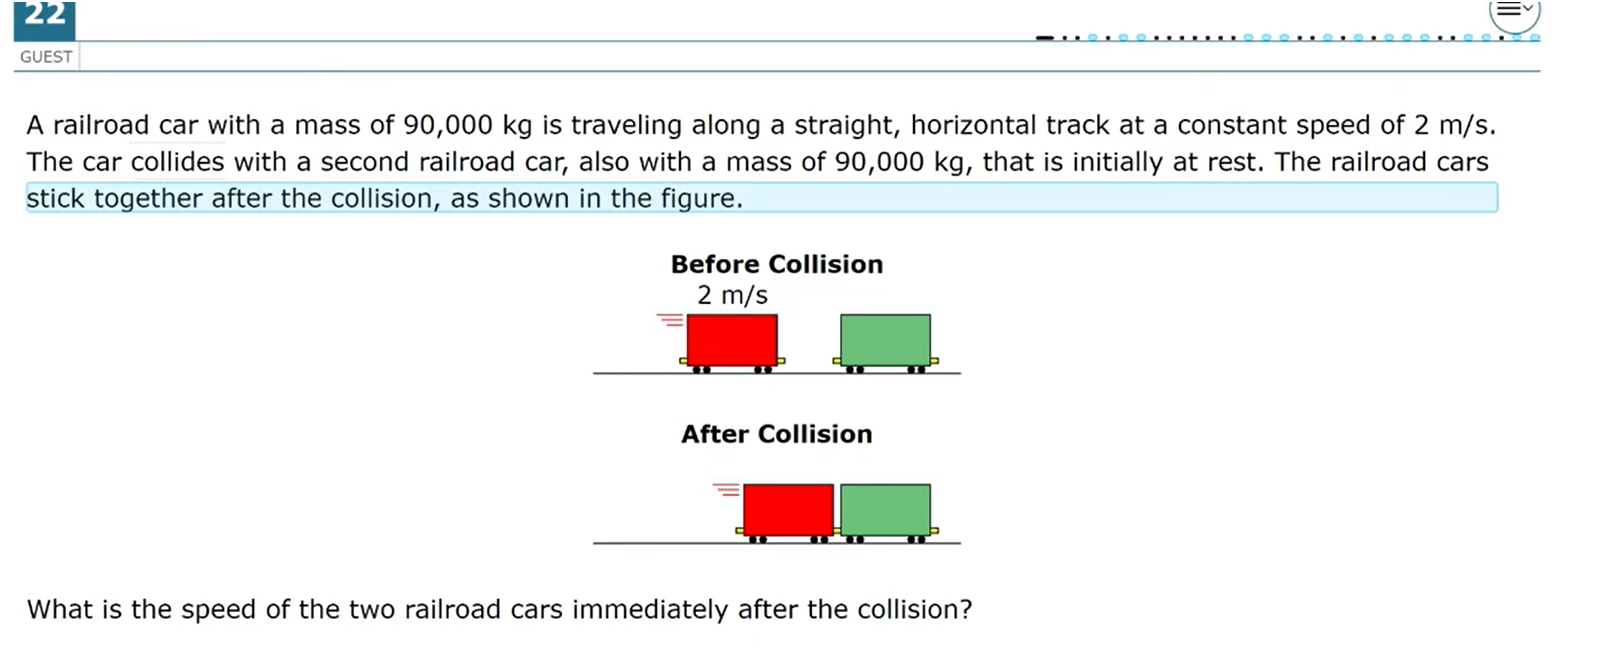


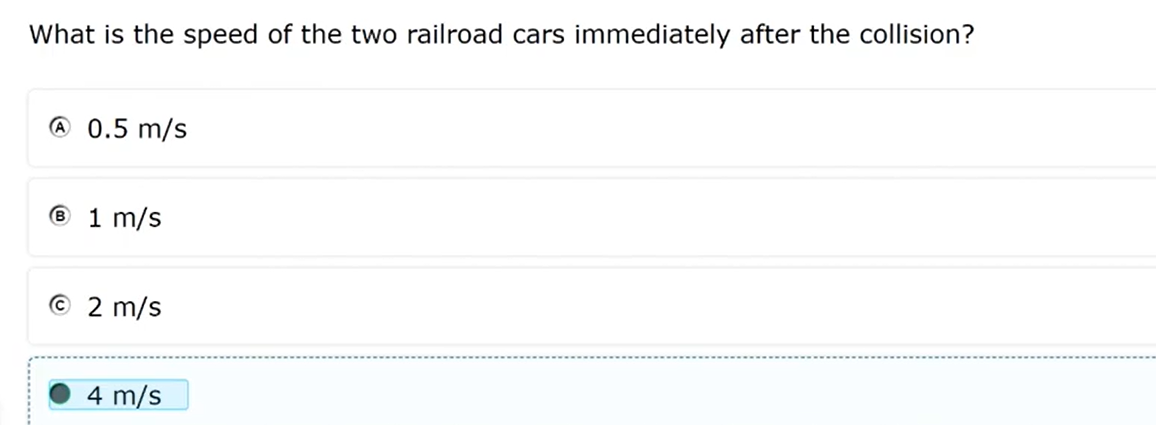


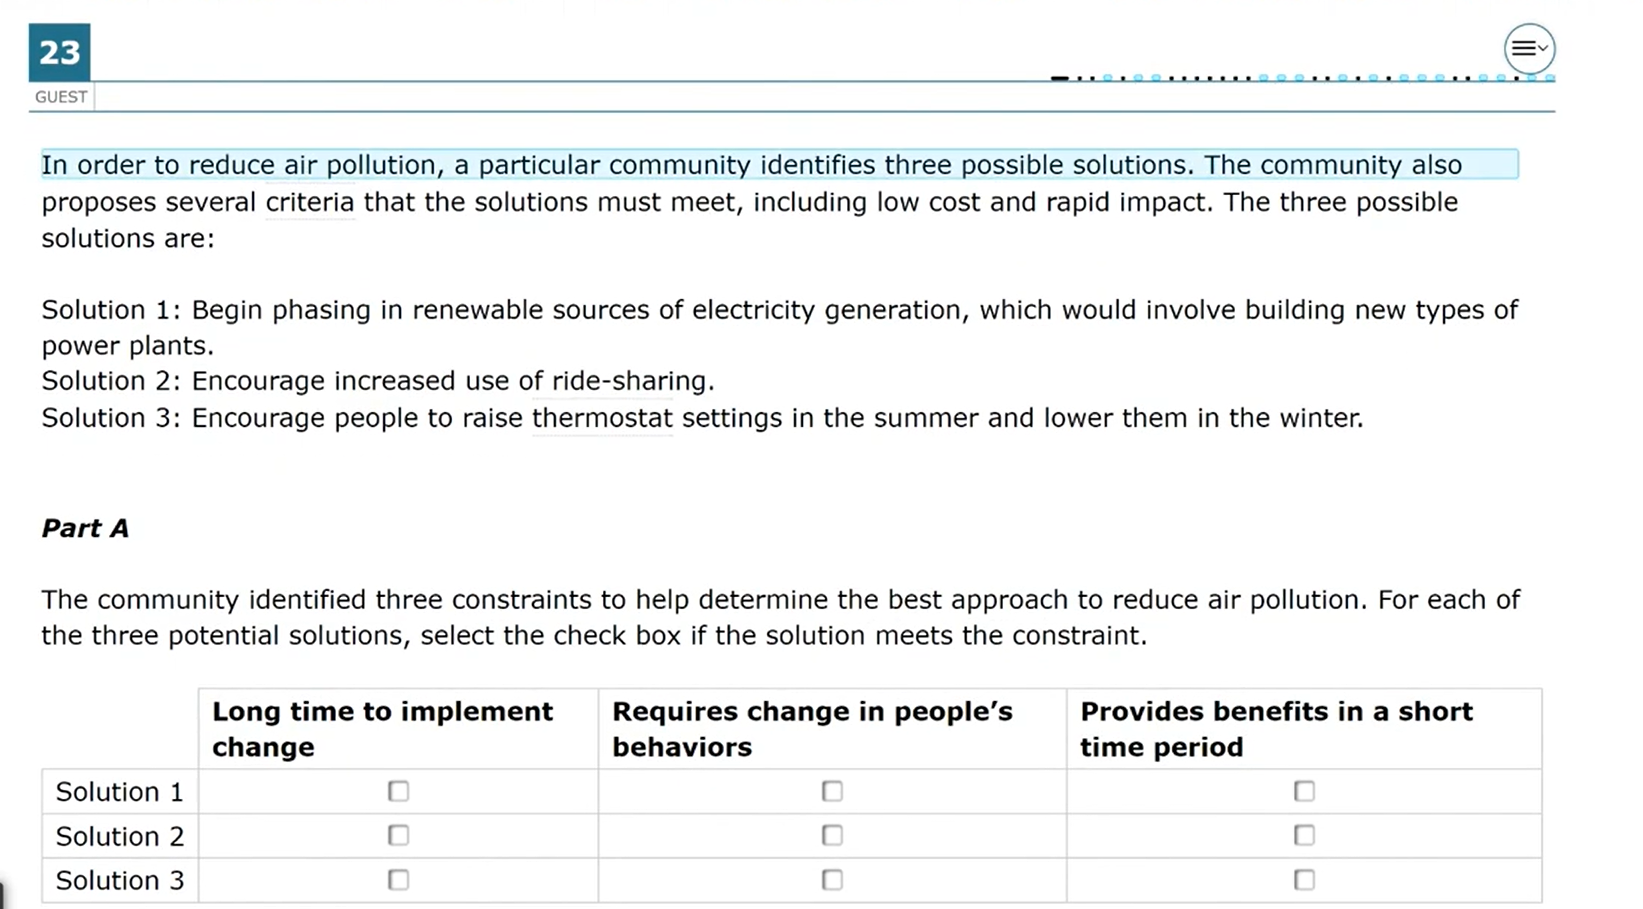


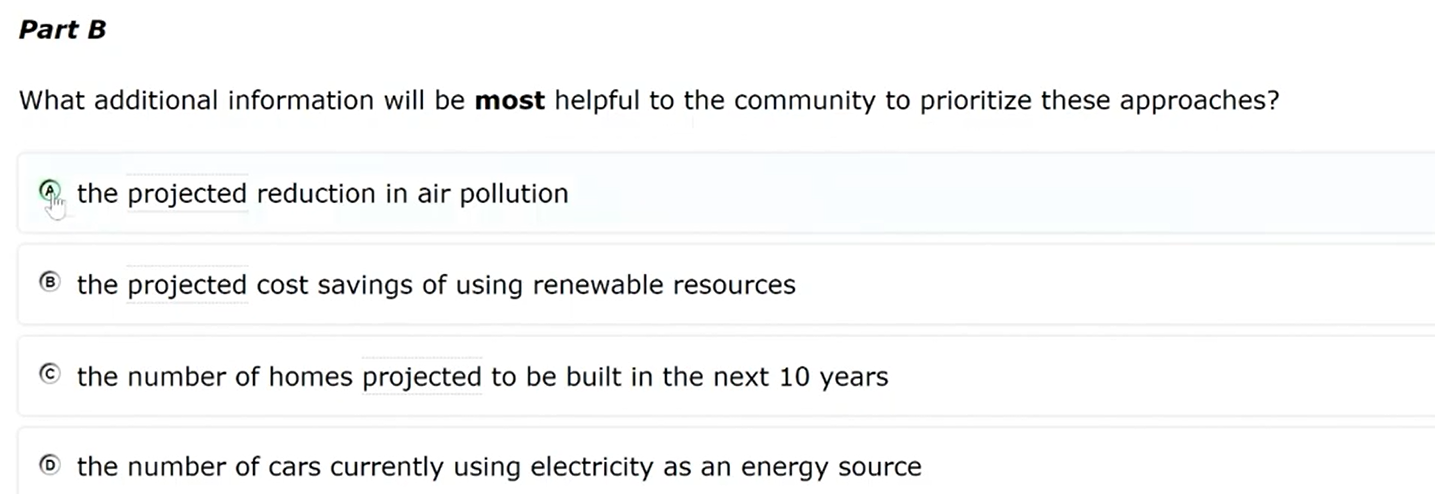


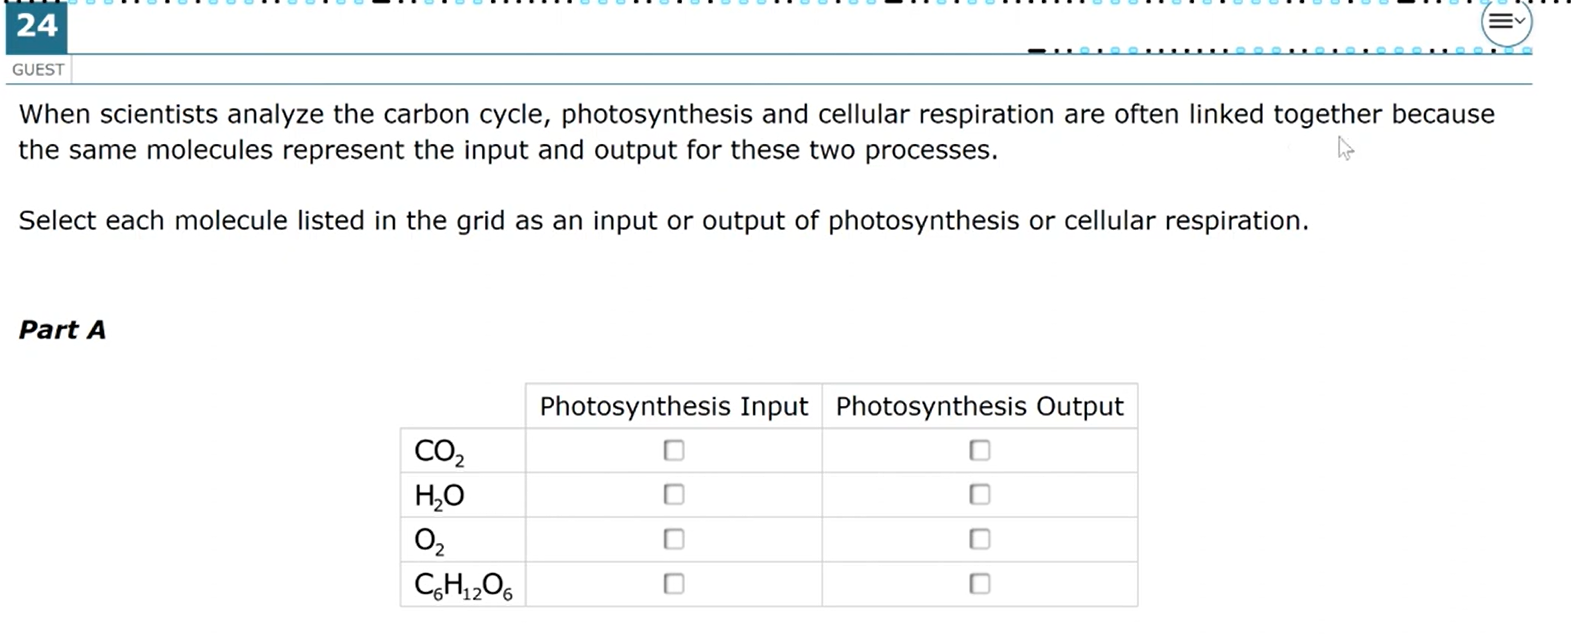


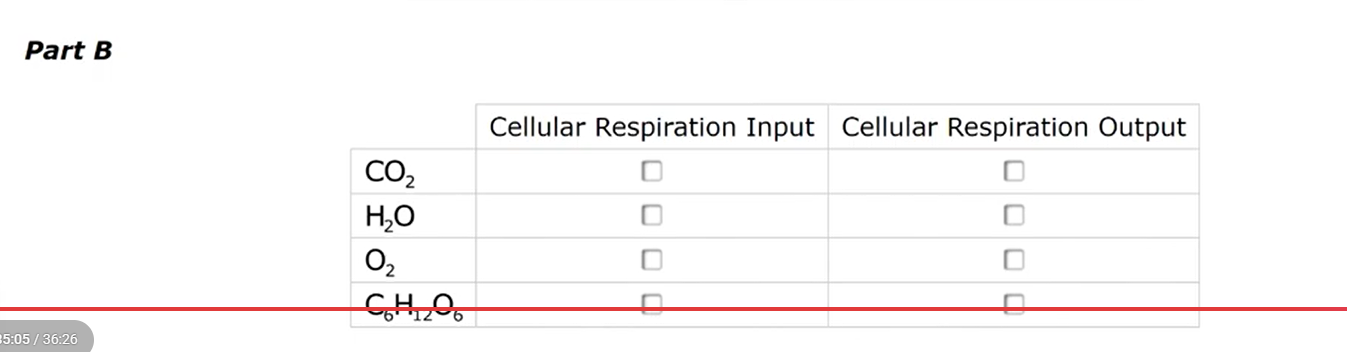


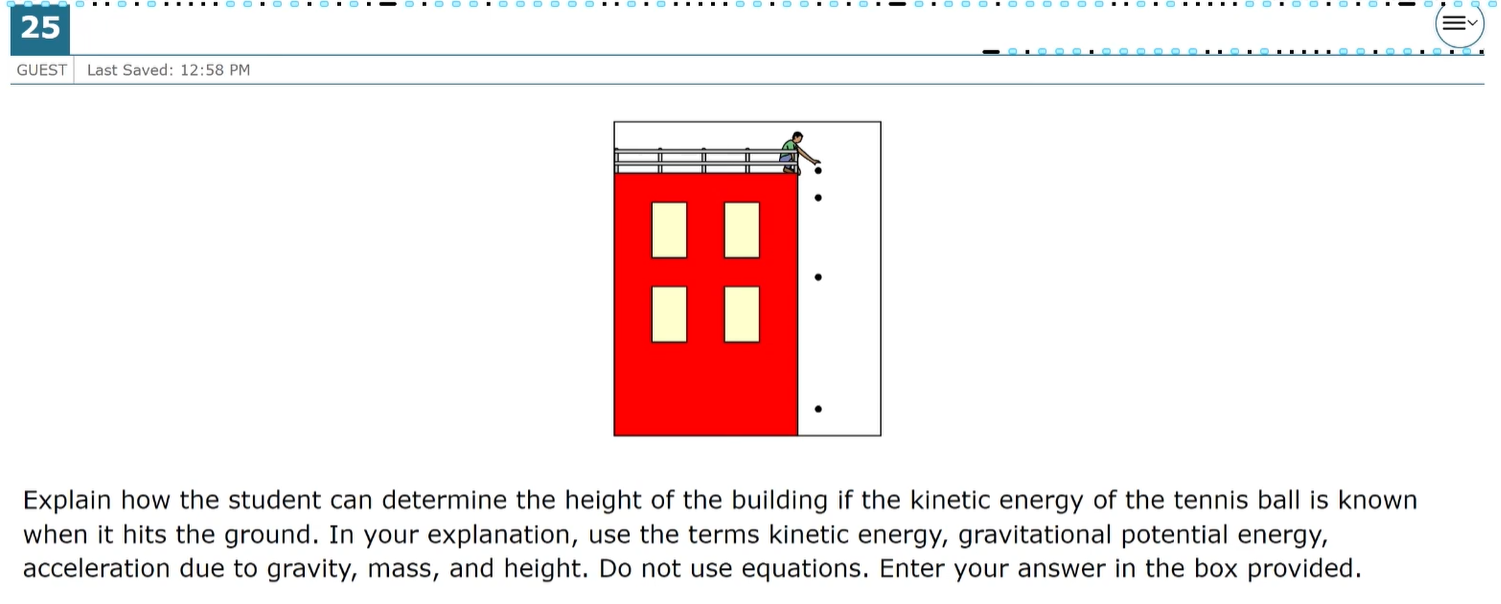


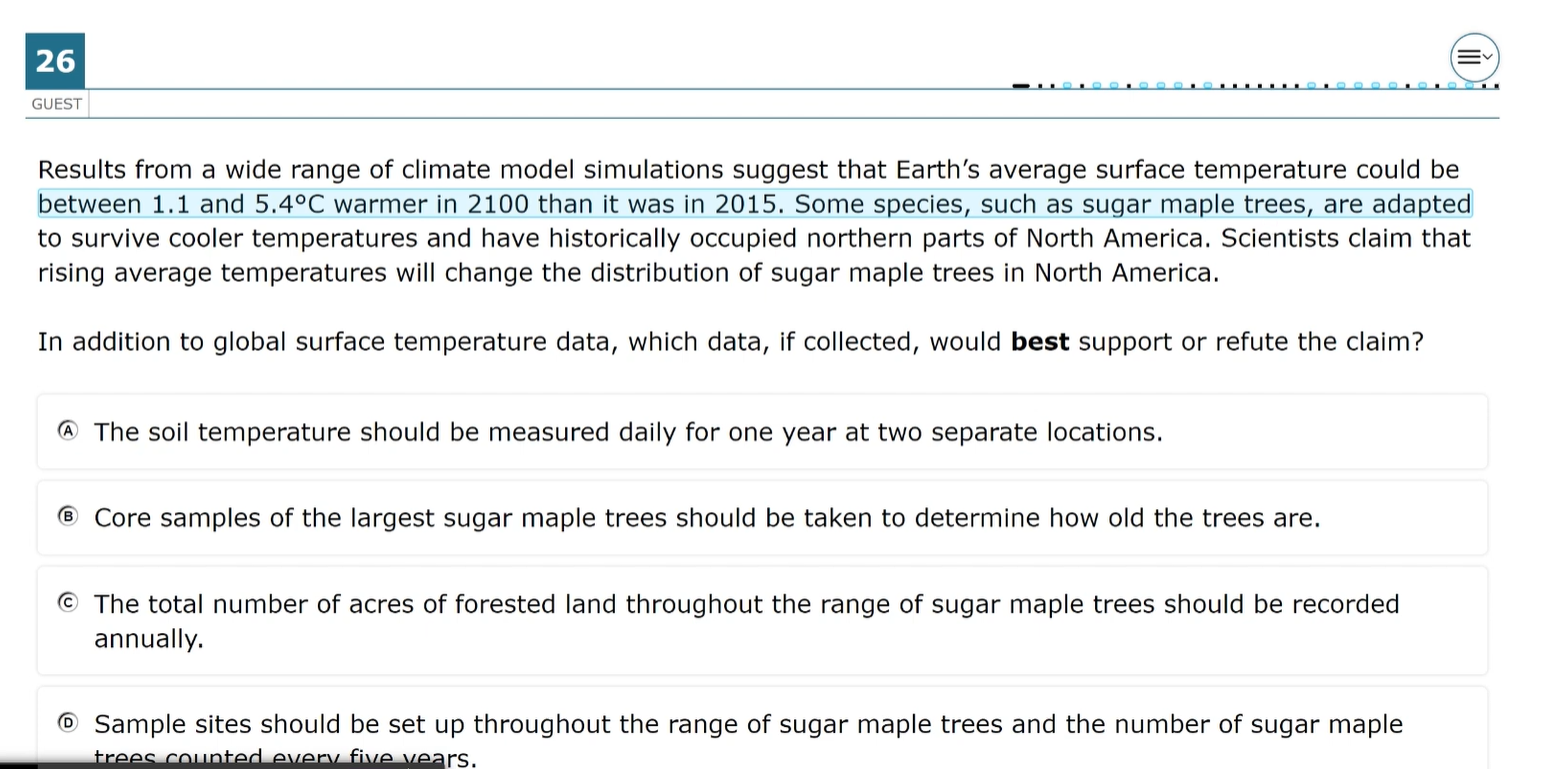


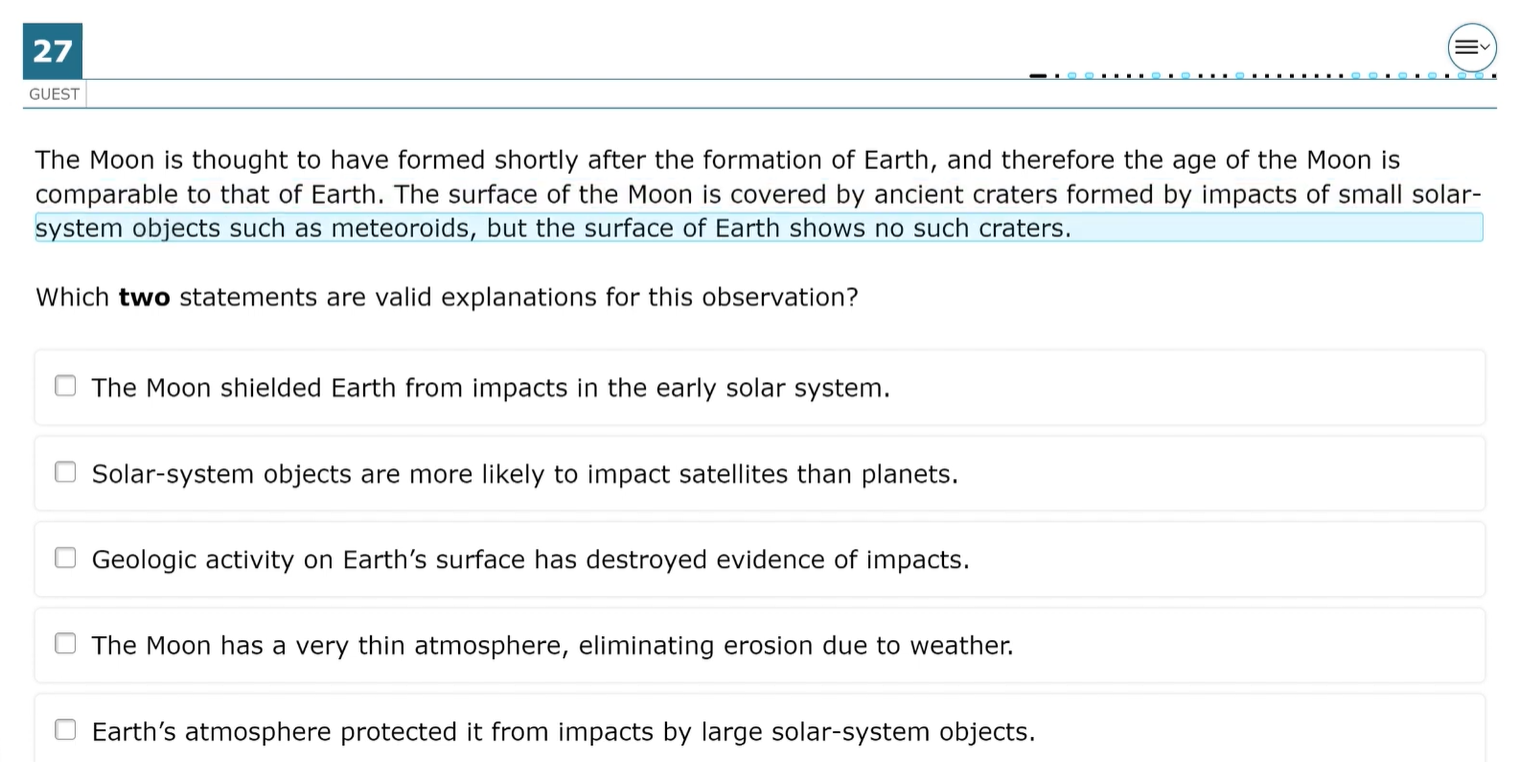


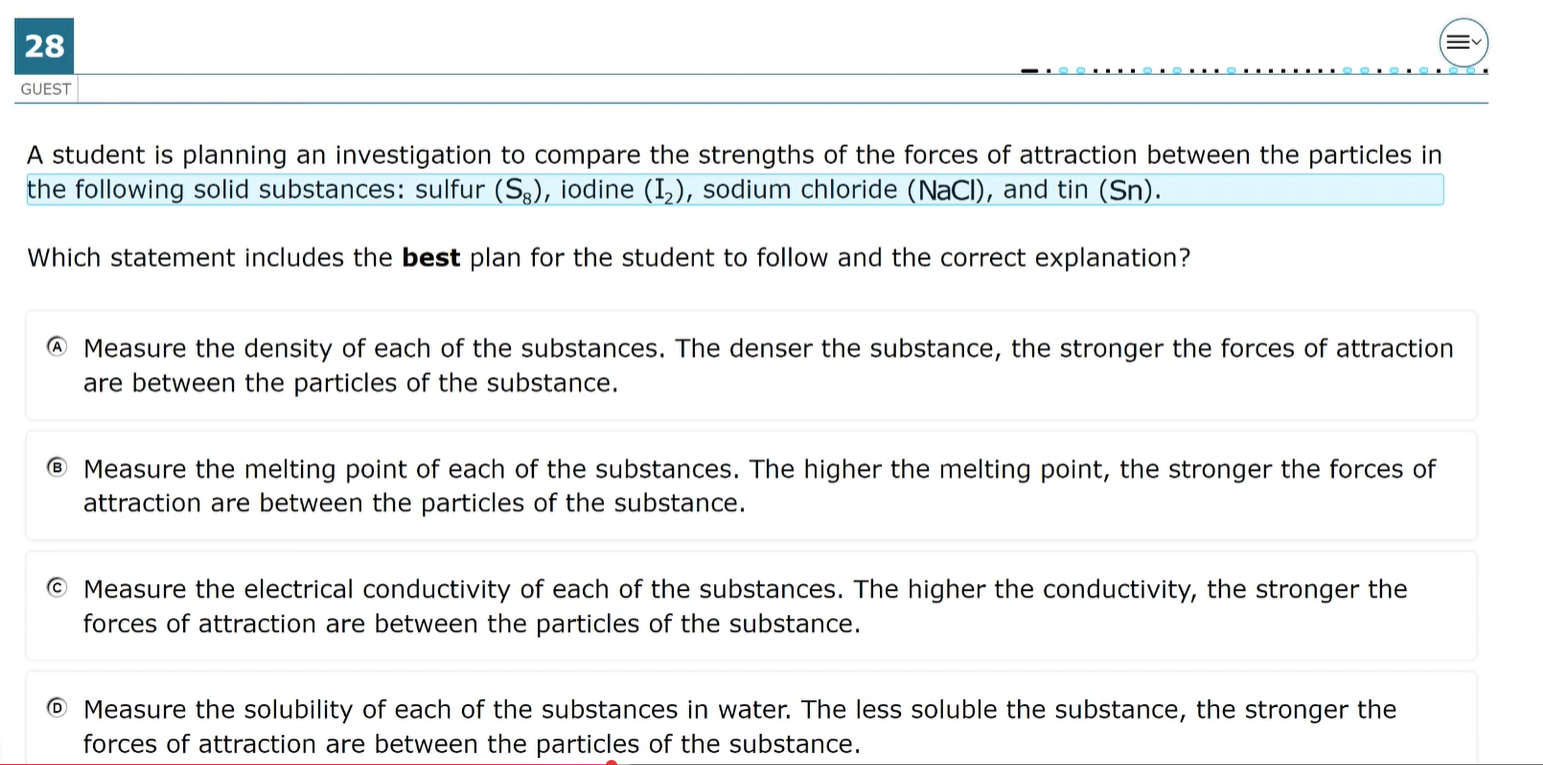


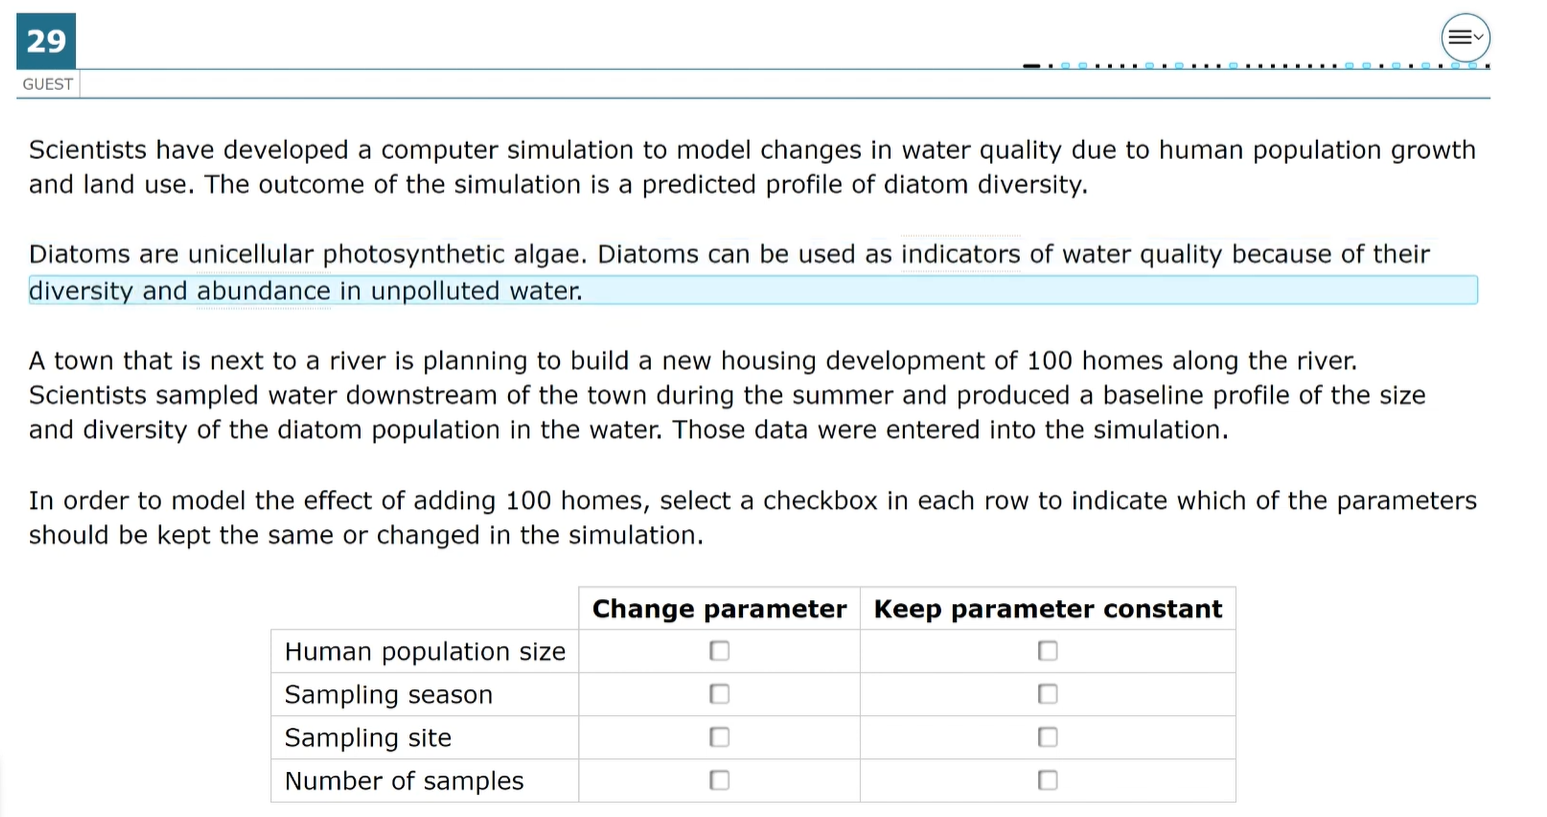


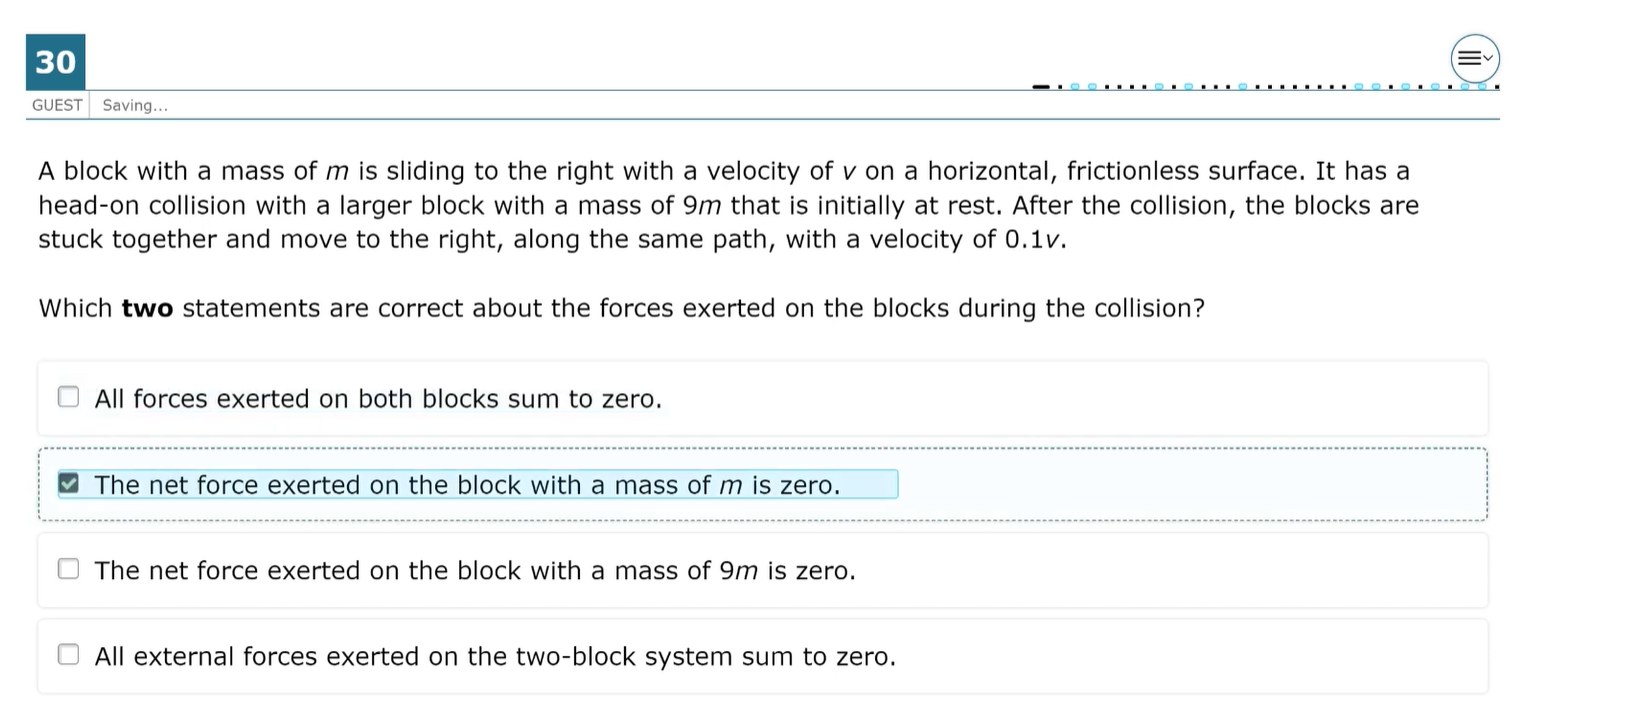


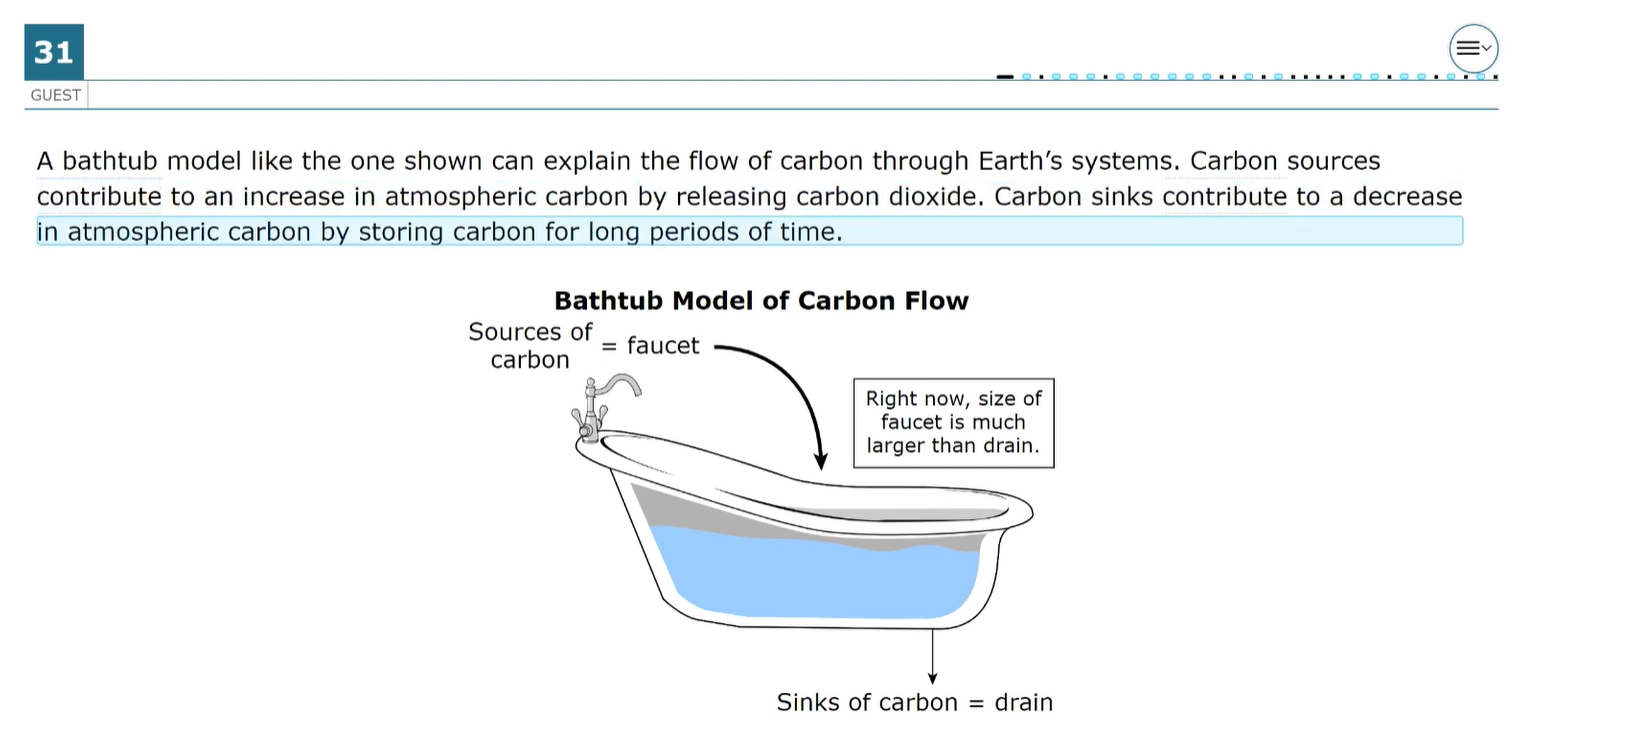


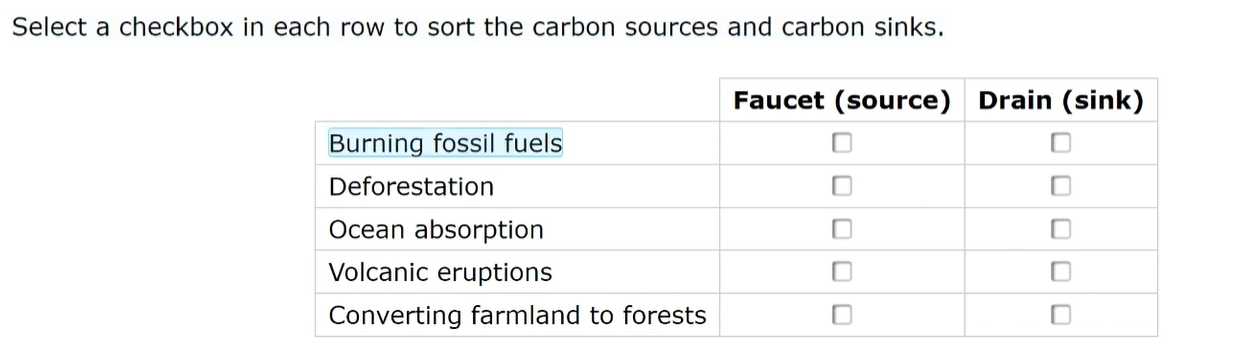


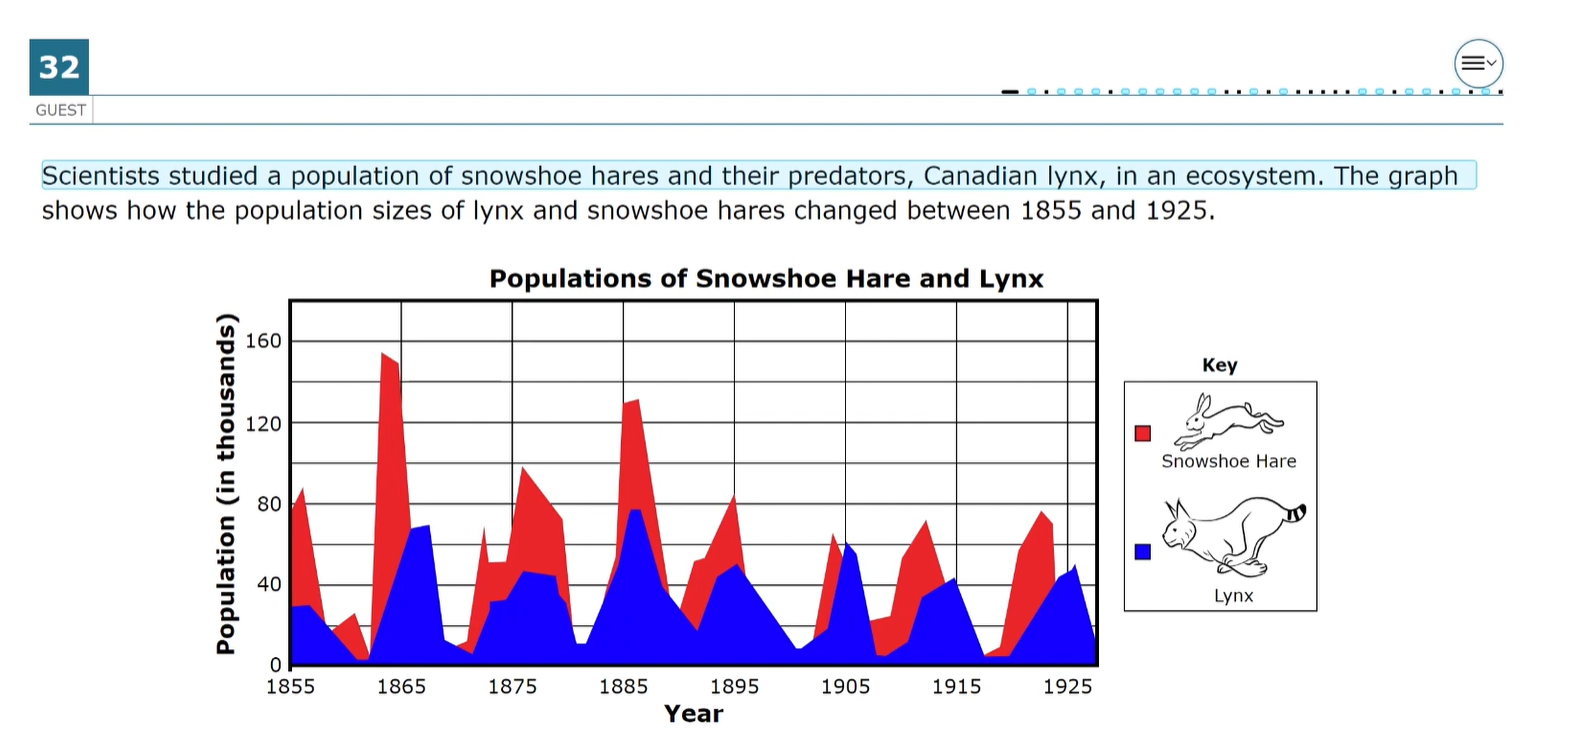


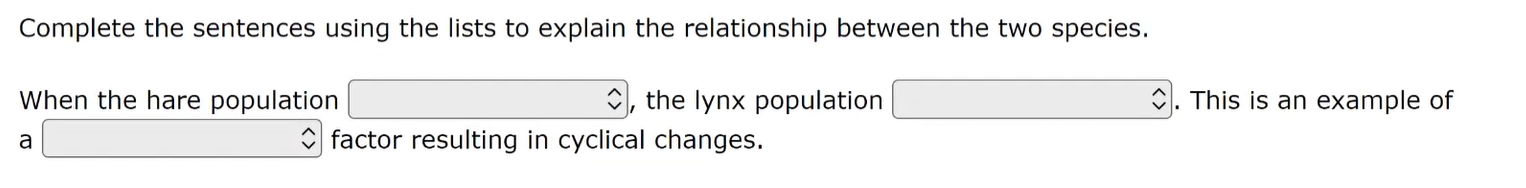

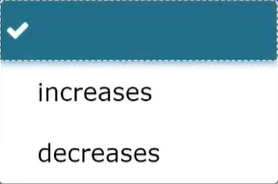

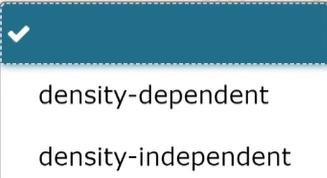

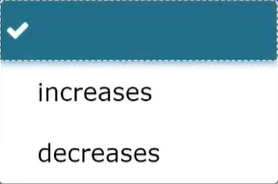


**Biology Performance Task**


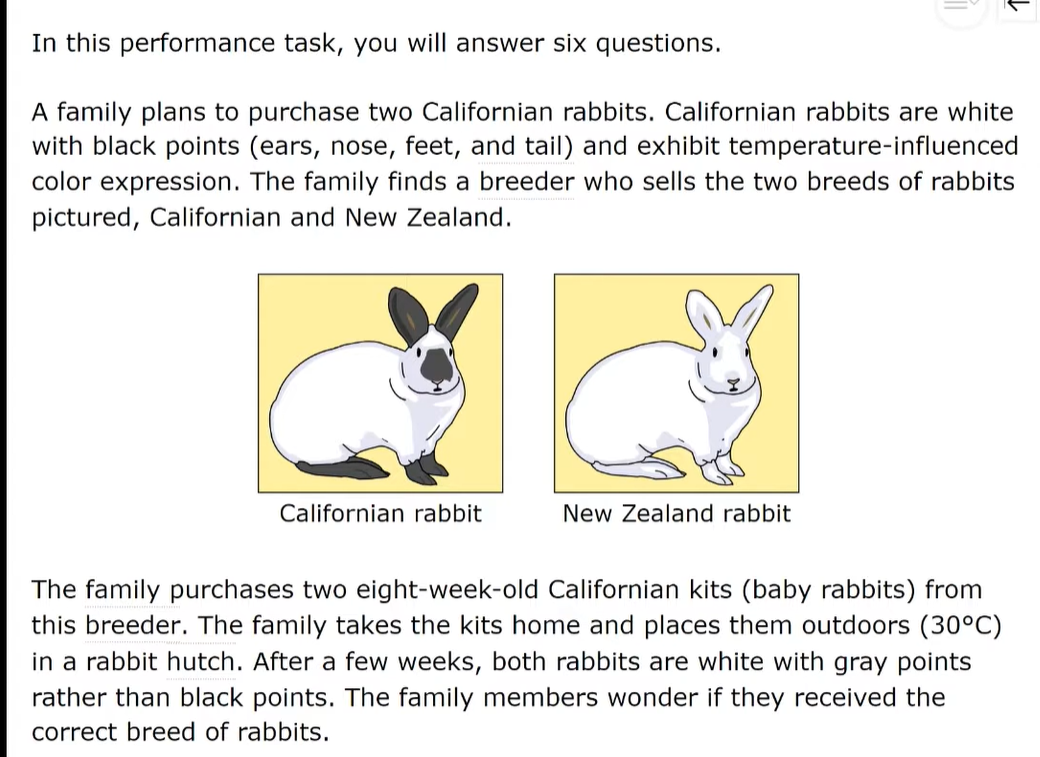


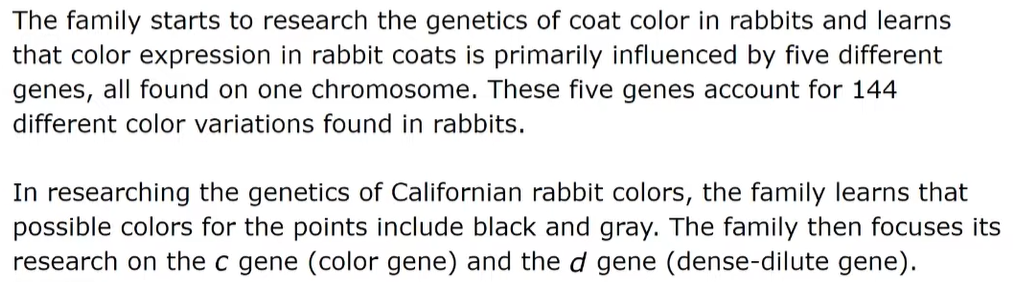


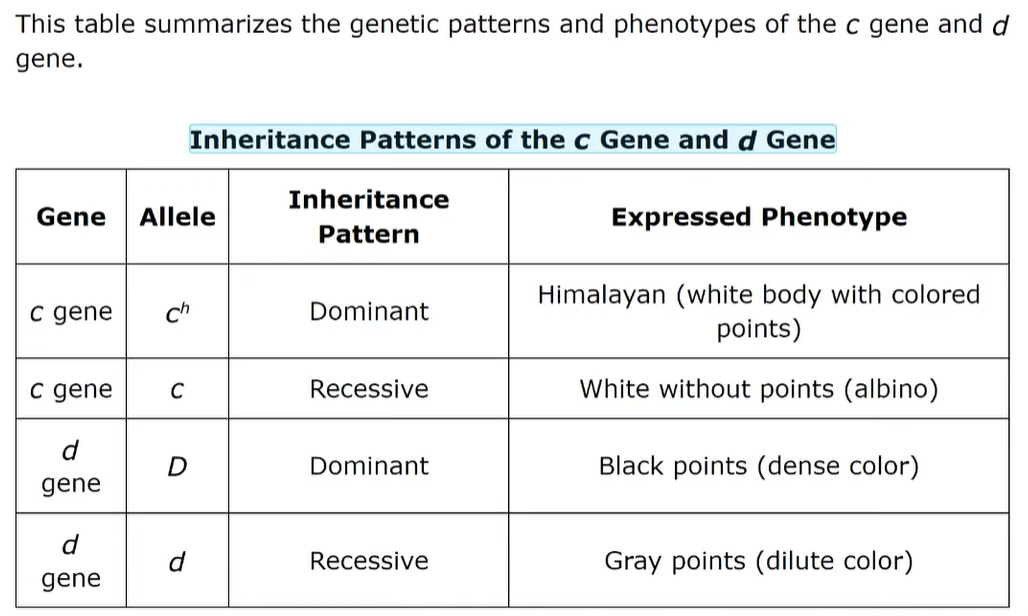


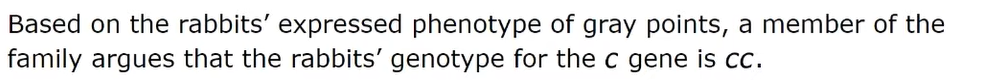
’


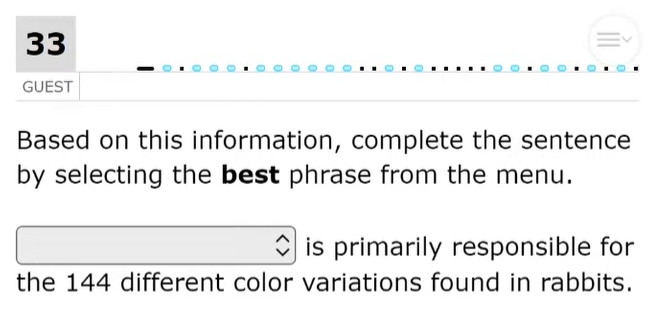

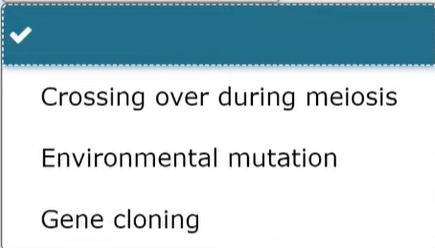


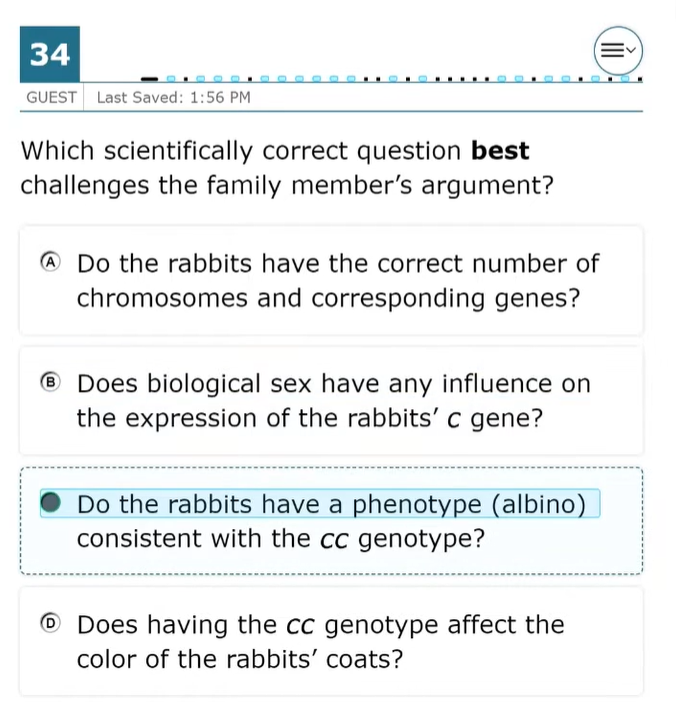


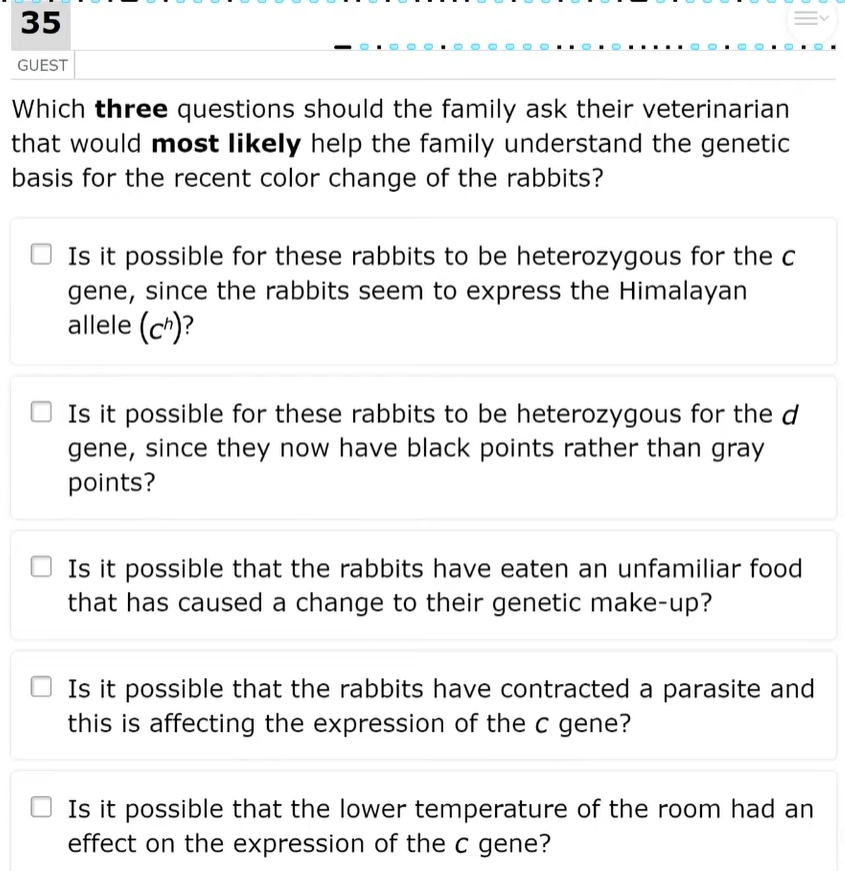


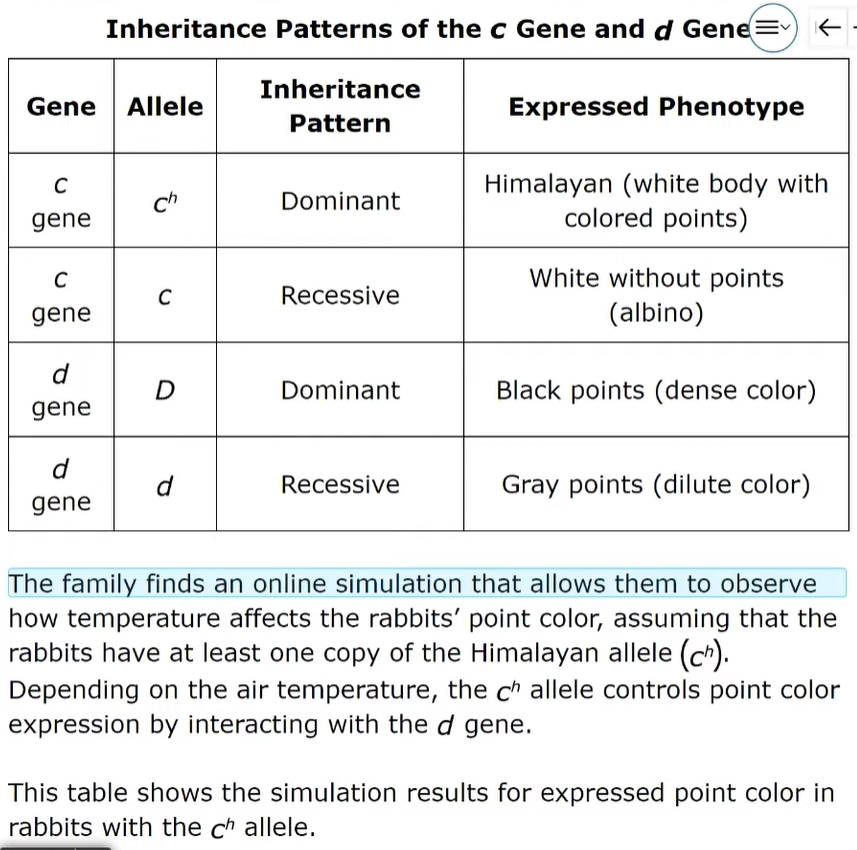


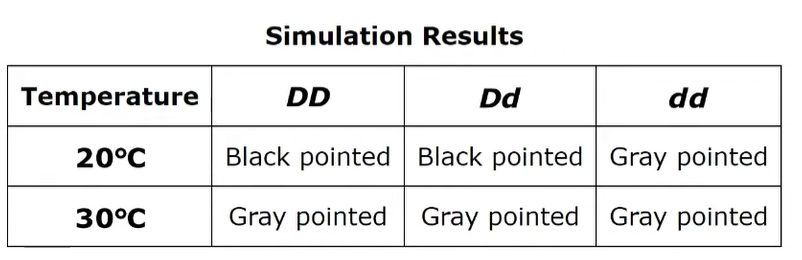


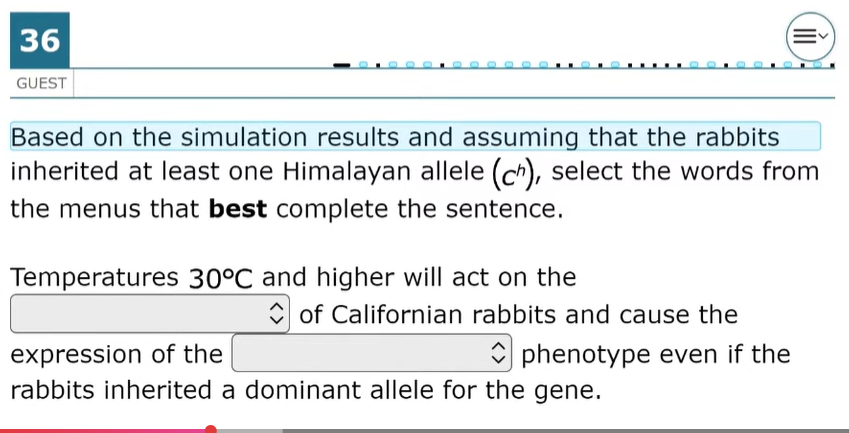


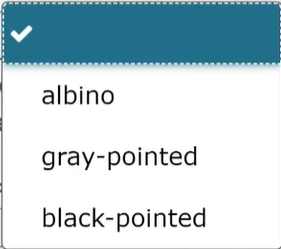

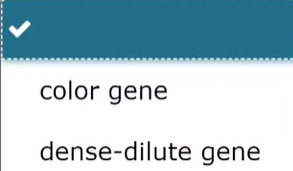


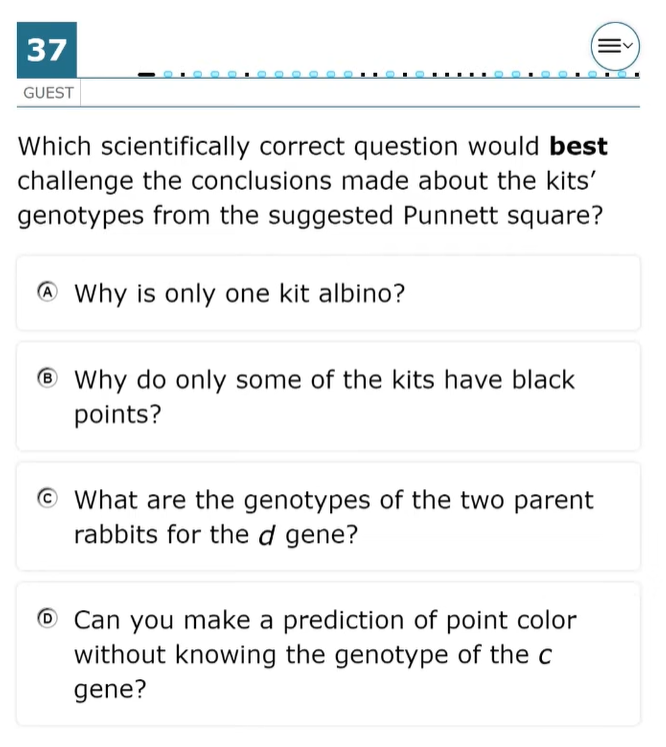


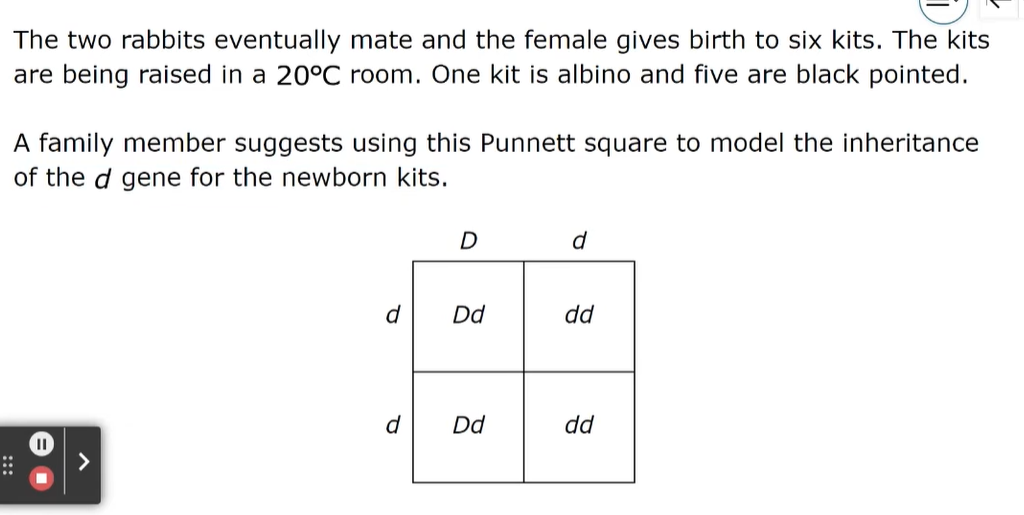


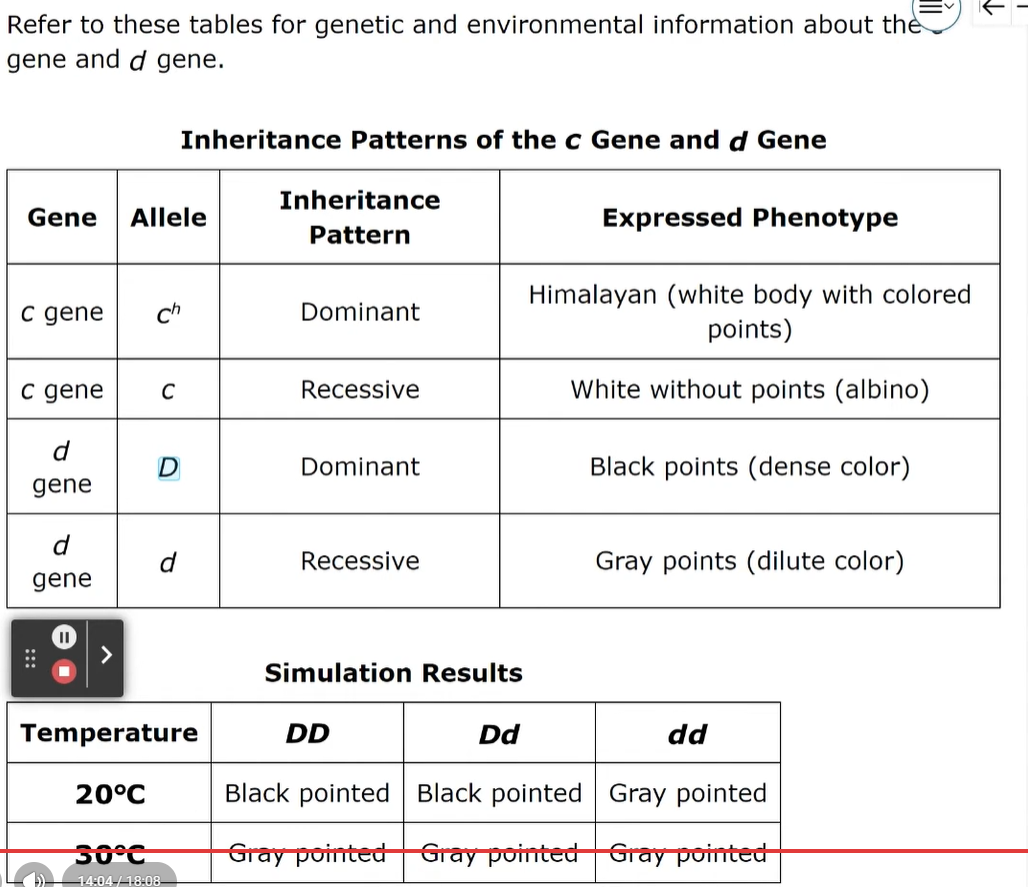


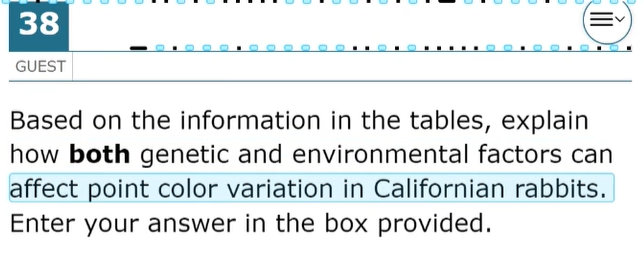


**Chemistry Performance Task**


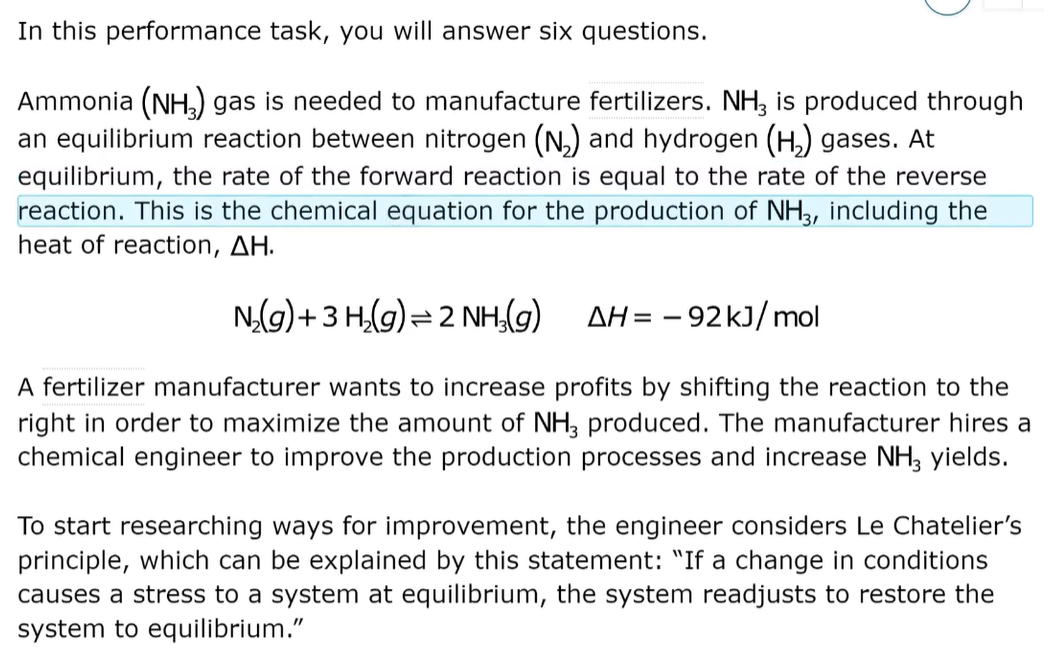


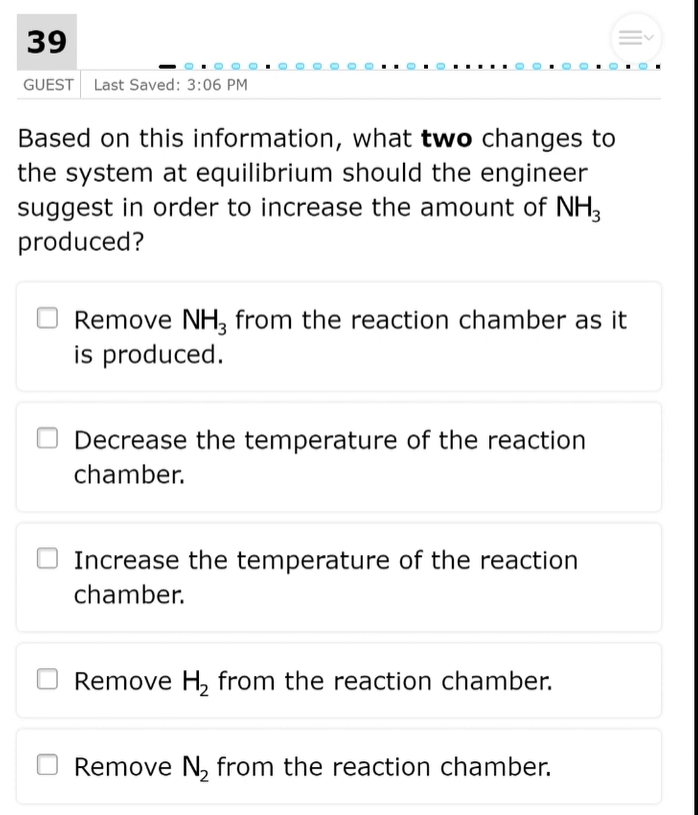


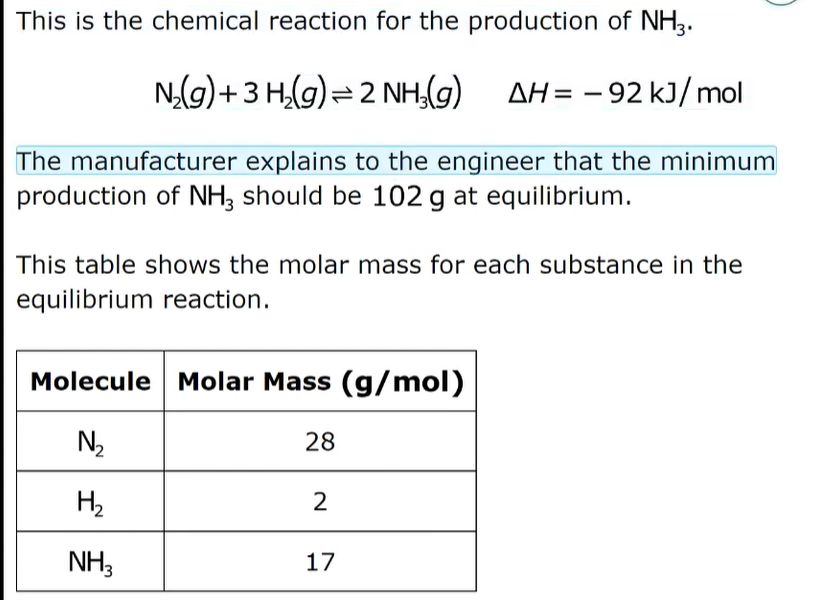


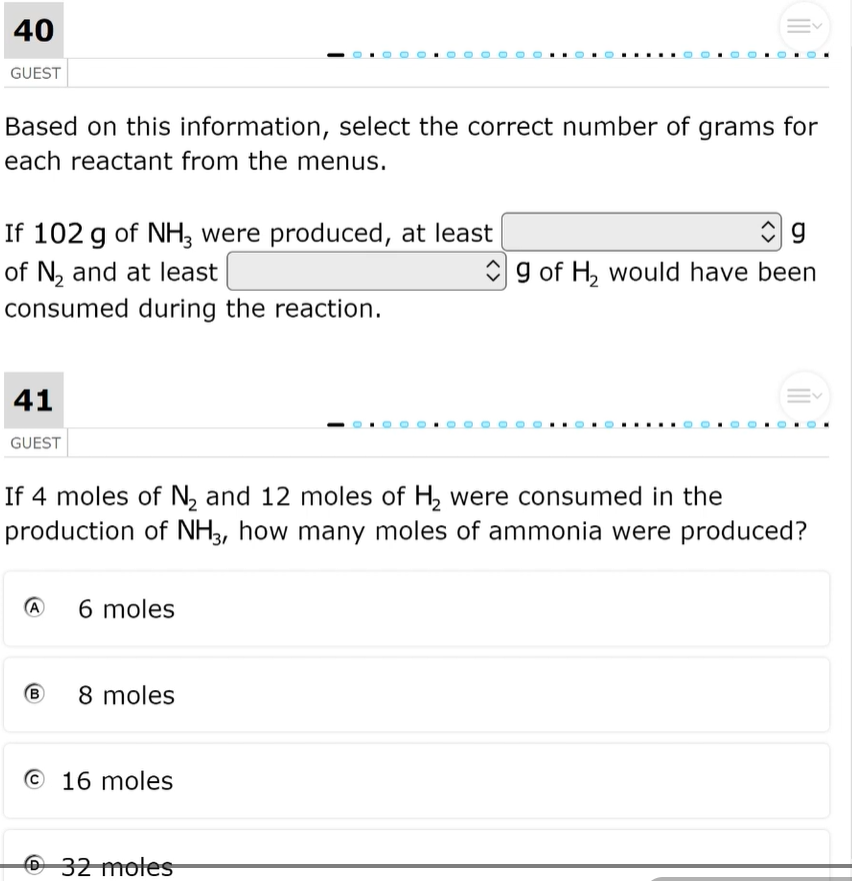

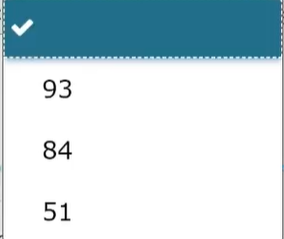

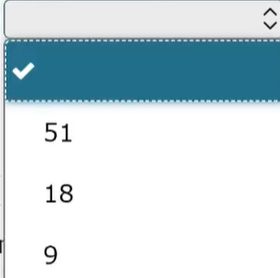


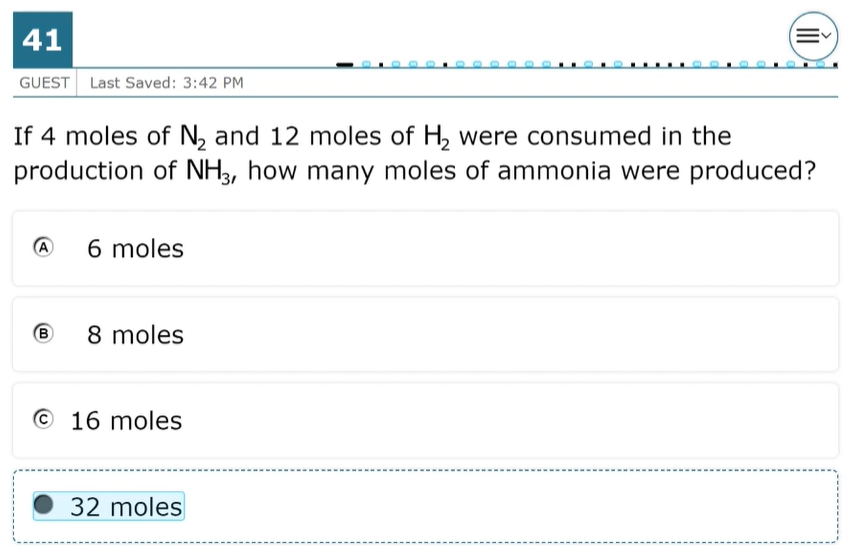


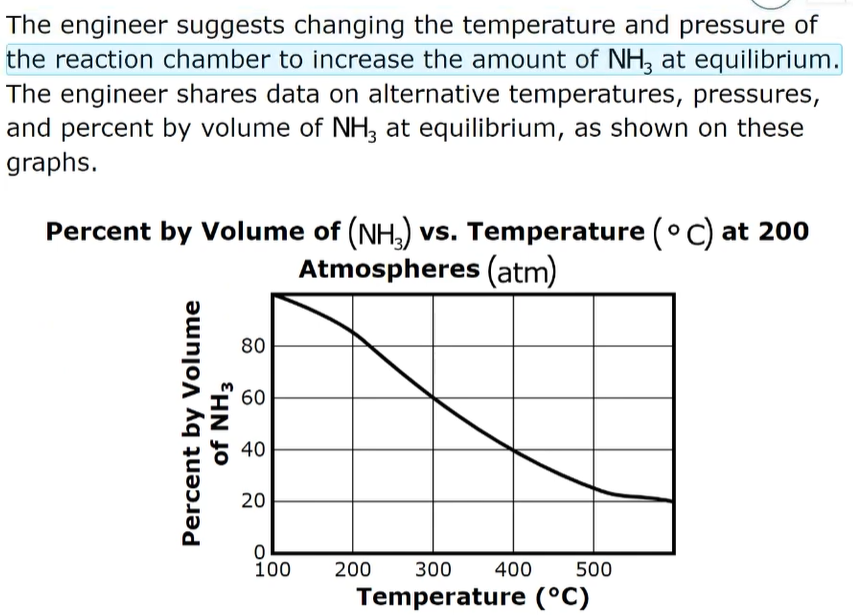


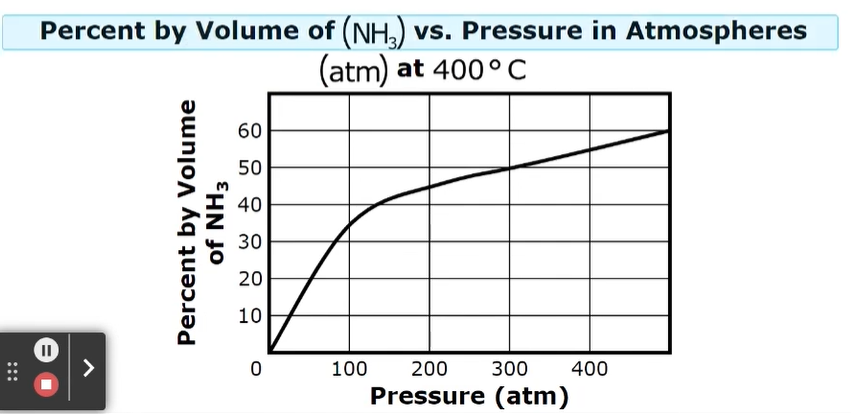


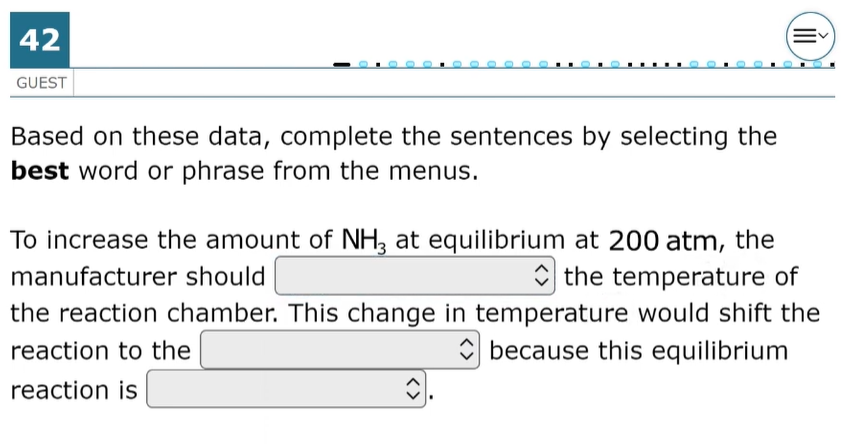

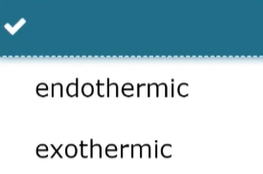

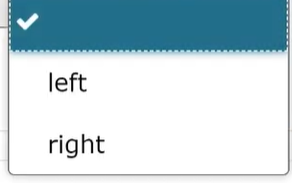

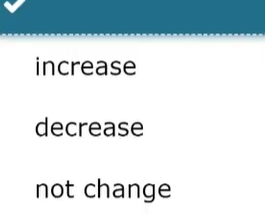


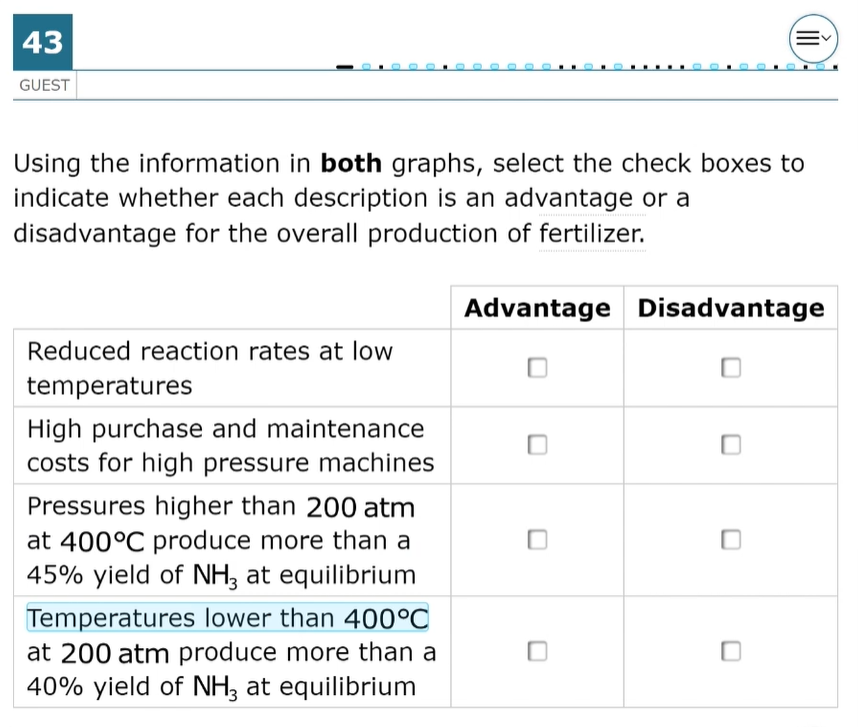


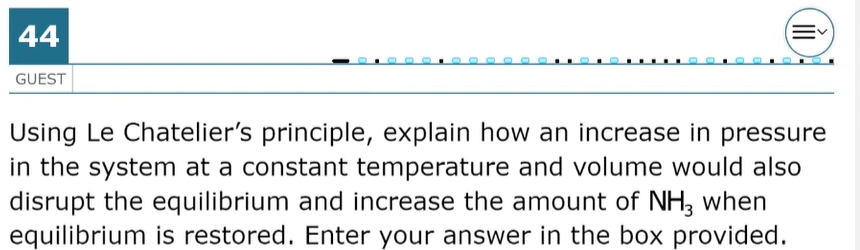


**Earth-Space Performance Task**


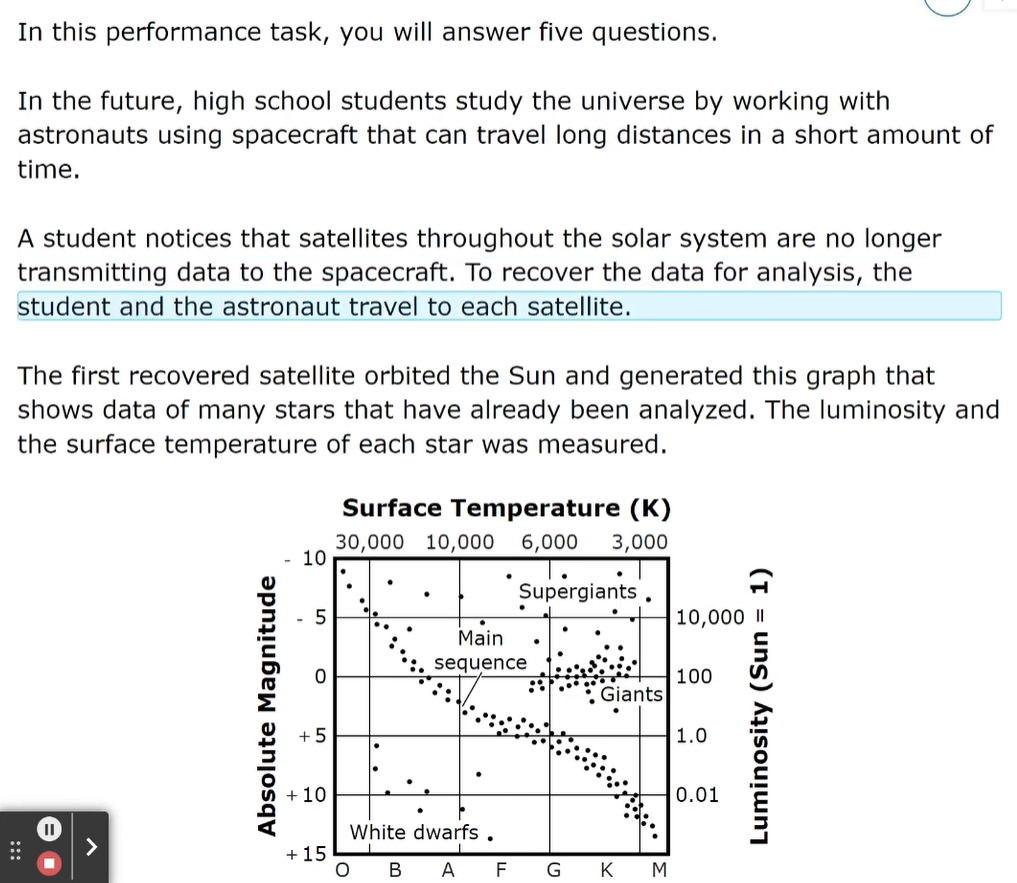


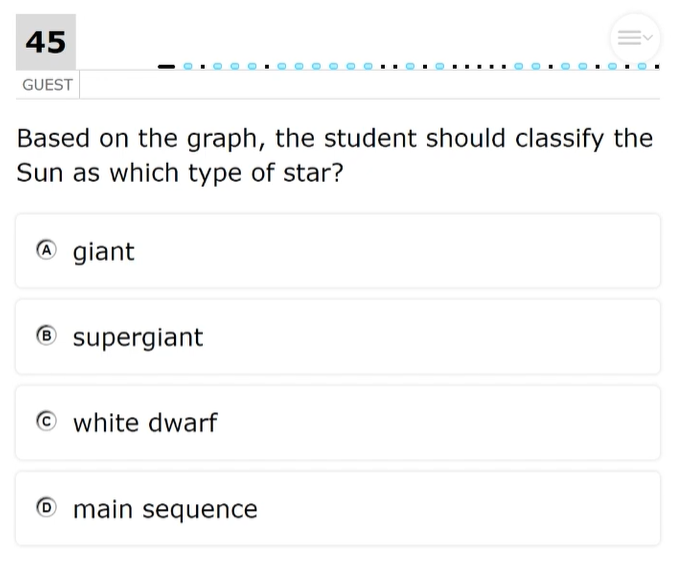


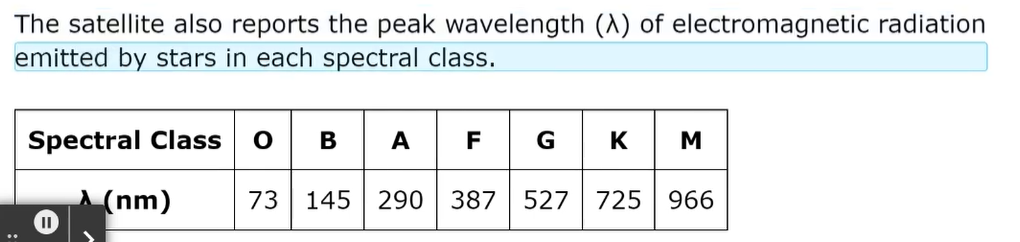


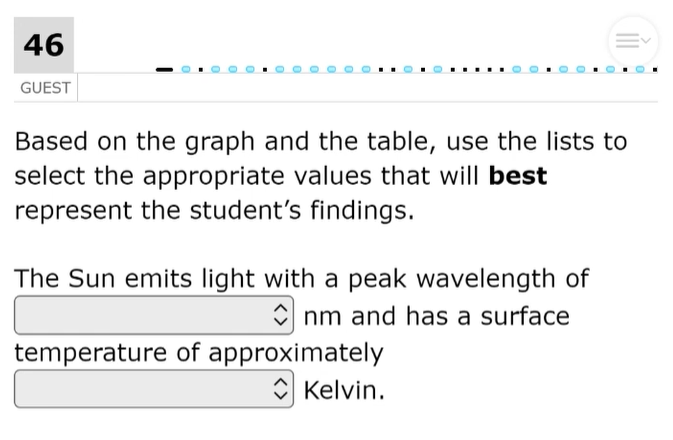

Supplement: Supplementary file 3 [file 7aa1c0e94da2cf2e2dfebef7.docx]
