# Supplementary material
Source: Research Square preprint supplement (doi:10.21203/rs.3.rs-10305653/v1)
Supplement: Supplementary file 2 [file 6c7910ce30687208dd62e101.xlsx]

## Sheet: All test & item summary
MA Test Items	Rating	Initial Coding Agreement	Final Coding Agreement		NY Test Items	Rating	Initial Coding Agreement	Final Coding Agreement		CA Test Items	Rating	Initial Coding Agreement	Final Coding Agreement		FL Test Items	Rating	Initial Coding Agreement	Final Coding Agreement		IL Test Items (ACT)	Rating	Initial Coding Agreement	Final Coding Agreement		TX Test Items	Rating	Initial Coding Agreement	Final Coding Agreement		NC Test Items	Rating	Initial Coding Agreement	Final Coding Agreement		All Ratings
1	5	1	1		1	5	1	1		1	5	1	1		1	5	1	1		1	F	1	1		1	F	1	1		1	5	1	1		5
2	5	1	1		2	5	1	1		2	5	1	1		2	5	1	1		2	F	1	1		2	5	1	1		2	5	1	1		5
3	5	1	1		3	5	1	1		3a	F	1	1		3	5	1	1		3	F	1	1		3	5 or R	0	0		3	5	1	1		5
4	5	1	1		4	5	1	1		3b	F	0	1		4	5	1	1		4	F	1	1		4a	5	1	1		4	5	1	1		5
5	5	1	1		5	5	0	1		4	5	1	1		5	5	1	1		5	5	1	1		4b	5	1	1		5	5	1	1		5
6A	F	1	1		6	5	1	1		5	5	1	1		6	5	1	1		6	5	1	1		5	5	1	1		6	5	1	1		F
6B	5	1	1		7	5	1	1		6	5	1	1		7	5	1	1		7	5	1	1		6	5	1	1		7	5	1	1		5
7	5	1	1		8	5	1	1		7	5	1	1		8	5	1	1		8	5	1	1		7	5	1	1		8	5	1	1		5
8	5	1	1		9	5	1	1		8	5	1	1		9	5	1	1		9	5	1	1		8	5	1	1		9	5	1	1		5
9	5	1	1		10	5	1	1		9	5	1	1		10	5	1	1		10	5	1	1		9	5	1	1		10	5	1	1		5
10A	5	1	1		11	5	1	1		10	5	1	1		11	5	1	1		11	5	1	1		10	5	1	1		11	5	1	1		5
10B	5	1	1		12	5	1	1		11	5	0	1		12	5	1	1		12	F	0	1		11	5	1	1		12	5	1	1		5
10C	5	1	1		13	5	0	1		12	5	1	1		Total agreement		12	12		13	F	0	1		12	5	1	1		13	5	1	1		5
11A	5	1	1		14	2	1	1		13	5	1	1		Percent agreement (FL)		100	100		14	5 or F	0	0		13	5	1	1		14	5	1	1		5
11B	5	1	1		15	5	1	1		14a	5	0	1							15	F	0	1		14	5	1	1		15	5	1	1		5
12	5	1	1		16	5	1	1		14bi	5	1	1							16	F	0	1		15	5	1	1		16	5	1	1		5
13	5	1	1		17	5	1	1		14bii	5	1	1							17	5	1	1		16	5	1	1		17	5	1	1		5
14	5	1	1		18	5	1	1		15	5	1	1							18	5	1	1		17	5	1	1		18	2	1	1		5
15A	5	0	1		19	5	1	1		16a	F	1	1							19	F	0	1		18	5	1	1		19	5	1	1		5 or F
15B	5	0	1		20	5	1	1		16b	5	1	1							20	F	0	1		19a	5	1	1		20	5	1	1		4 or 5 or F
16A	F	1	1		21	5	1	1		17a	5	1	1							21	5	1	1		19b	5	1	1		21	5	1	1		F
16B	5	1	1		22	5	1	1		17b	5	1	1							22	F	0	1		20	5	0	1		22	5	1	1		5
16C	5	1	1		23	5	1	1		18	5	1	1							23	R	0	1		21	5	1	1		23	5	0	1		5
17	5	1	1		24	5	0	1		19a	2	1	1							24	F	1	1		22	5	1	1		24	3	1	1		5
18	5	1	1		25	5	1	1		19b	2	1	1							25	F	1	1		23	5	1	1		25	5	1	1		5
19	5	1	1		26	5	1	1		19c	2	1	1							26	F	0	1		24	5	1	1		26	5	1	1		5
20A	5	1	1		27	5	1	1		20	5	1	1							27	F	1	1		25	5	1	1		27	5	1	1		5
20B	5	1	1		28	5	1	1		21a	5	1	1							28	F	1	1		26	5	1	1		28	5	1	1		5
20C	5	1	1		29	5	1	1		21b	5	1	1							29	F	1	1		27	5	1	1		29	5	1	1		5
20D	5	1	1		30	5	0	1		22	5	1	1							30	F	1	1		28	5	1	1		30	D	0	1		5
21A	5	1	1		31	5	0	1		23A	2	1	1							31	F	1	1		29	5	1	1		31	5	1	1		5
21B	5	0	1		32	5	0	1		23B	2	1	1							32	F	1	1		30	5	1	1		32	5	0	1		5 or F
21C	F	1	1		33	5	1	1		24A	5	1	1							33	5	1	1		31	F	0	1		33	5	1	1		F
21D	5	0	1		34	5	0	1		24B	5	1	1							34	5	1	1		32	5	1	1		34	5	1	1		5 or F
22	5	1	1		35	5	0	1		25	5	1	1							35	F	0	1		33	5	1	1		35	5	1	1		5
23	5	1	1		36	5	1	1		26	5	1	1							36	5	1	1		34	5	1	1		36	5	1	1		5
24	5	1	1		37	F	0	1		27	5	1	1							37	5	1	1		35	5	1	1		37	5	1	1		5
25A	5	1	1		38	5	0	1		28	5	1	1							38	F	0	1		36	5	1	1		38	5	1	1		5
25B	5	1	1		39	5	0	1		29	5	1	1							39	F	0	1		37	5	1	1		39	D	1	1		5
26	5	1	1		40	3	1	1		30	5	1	1							40	F	0	1		38	5	1	1		40	5	0	1		5
27	5	1	1		41	5	1	1		31	5	1	1							Total agreement		26	39		39	5	1	1		41	5	1	1		5
28	5	1	1		42	5	1	1		32a	F	1	1							Percent agreement (IL)		65	97.5		40	5	1	1		42	5	1	1		5
29	5	0	1		43	5	0	1		32b	F	1	1												41	5	1	1		43	5	1	1		5 or F
30	5	1	1		44	F	0	1		32c	5	1	1												42	5	1	1		44	5	1	1		5
31	5	1	1		45	F	0	1		33	5	1	1												43	5	1	1		45	5	1	1		5
32A	5	0	1		46	F	1	1		34	5	1	1												44	5	1	1		46	5	1	1		5 or F
32B	5	1	1		47	5	1	1		35	5	1	1												45	5	1	1		47	5	1	1		5
33	5	1	1		48	5	1	1		36a	5	1	1												Total agreement		44	46		48	5	1	1		5
34	5	0	1		49	5	0	1		36b	5	1	1												Percent agreement (TX)		93.617	97.8723		49	5	1	1		5 or F
35	5	1	1		50	5	0	1		37	5	1	1																	50	5	1	1		5
36A	5	1	1		51	5	0	1		38	5	1	1																	Total agreement		46	50		5
36B	5	1	1		52	5	1	1		39	5	1	1																	Percent agreement (NC)		0.92	100		5
37A	5	1	1		53	5	1	1		40a	5	0	1																						5
37B	5	1	1		54	5	1	1		40b	5	0	1																						5
38	5	1	1		55	5	1	1		41	5	0	1																						5
39	5	1	1		56	5	1	1		42a	F	0	1																						5
40	5	1	1		57	5	1	1		42b	F	0	1																						5
41A	5	1	1		58	5	0	1		42c	5	1	1																						5
41B	5	1	1		59	5	0	1		43	5 or F	0	0																						5
42A	5	0	1		60	3	0	1		44	5	1	1																						4 or 5
42B	5	0	1		61	5	1	1		45	F	1	1																						4 or 5
42C	5	0	1		62	5	1	1		46a	F	1	1																						4 or 5
42D	5	1	1		63	F	0	1		46b	F	1	1																						5
Total agreement		53	63		64	5	1	1		47a	F	1	1																						5
Percent agreement (MA)		84.127	100		65	5	1	1		47b	F	1	1																						5
					66	5	1	1		48	5	1	1																						5
					67	5	1	1		49A	5	0	1																						5
					68	5	1	1		49B	5	1	1																						5
	Mean	Standard deviation			69	5	1	1		Total agreement		58	67																						5
Overall initial agreement (percent)	81.1828	12.3172			70	5	0	1		Percent agreement (CA)		85.2941	98.5294																						5
Overall final agreement	98.9836	1.12745			71	5	1	1																											5
					72	5	1	1																											5
					73	5	1	1																											5
	Number of items agreement	No. of items initial disagreement	Percent disagreement		74	5	1	1																											5
MA	53	10	0.15873		75	F	0	1																											5
NY	57	28	0.329412		76	5	0	1																											5
CA	58	9	0.134328		77	5	1	1																											2
FL	12	0	0		78	5	1	1																											5
IL	26	13	0.333333		79	F	1	1																											5
TX	44	2	0.0434783		80	F	1	1																											5
Totals	250	62	0.198718		81	5	0	1																											5
					82	5	1	1																											5
					83	F	0	1																											5
					84	5	0	1																											5
					85	5	0	1																											5
					Total agreement		57	85																											5
					Percent agreement (NY)		67.0588	100																											5
MA																																			5
Rating	Count of Rating			Codes																															5
5	60		State	2	3	4	5	D	R	DISAGREE	TOTAL ITEMS	% Science for Citizenship																							5
F	3		CA	5	0	0	50	12	0	1	68	0.0735294																							5
Grand Total	63		FL	0	0	0	12	0	0	0	12	0																							5
			IL	0	0	0	14	24	1	1	40	0																							5
			MA	0	0	0	62	1	0	0	63	0																							5
			NY	1	2	0	73	9	0	0	85	0.0352941																							5
			TX	0	0	0	44	2	0	1	47	0																							5
NY			NC	1	1	0	46	2	0	0	50	0.04																							5
Rating	Count of Rating		Totals	7	3	0	301	50	1	3	365																								5
2	1		Percents	0.0191781	0.00821918	0	0.824658	0.136986	0.00273973	0.00821918	1	0.0273973																							5
3	2																																		F
5	73																																		5
F	9																																		5
Grand Total	85																																		3
																																			5
CA					Disagreement about F/D vs. R:																														5
Rating	Count of Rating			MA	0																														5
2	5			NY	0																														F
5	50			CA	0																														F
5 or F	1			FL	0																														F
F	12			IL	0																														5
Grand Total	68			TX	1	Item 31																													5
																																			5
FL																																			5
Rating	Sum of Rating																																		5
5	60																																		5
Grand Total	60																																		5
																																			5
IL																																			5
Rating	Count of Rating																																		5
5	14																																		5
5 or F	1																																		5
F	24																																		5
R	1																																		3
Grand Total	40																																		5
																																			5
TX																																			F
Rating	Count of Rating																																		5
5	44		Rating	Count of Rating																															5
5 or R	1		2	1																															5
F	2		3	1																															5
Grand Total	47		5	46																															5
			D	2
All Ratings Across All States (including NC)			Grand Total	50																															5
All Ratings	Count of All Ratings																											5
2	7																											5
3	3																											5
5	280																											5
4 or 5	3																											5
4 or 5 or F	1																											F
5 or F	8																											5
5 or R	1																											5
D	2																											5
F	47																											F
R	1																											F
(blank)																												5
Grand Total	353																																		5
Distribution of goals across all items																																			F
2	0.01983																																		5
3	0.00849858																																		5
4	0																																		5
5	0.793201																																		5
F	0.13881																																		F
R	0.00283286																																		F
Mixed ratings	0.0368272																																		5
																																			5
																																			5
																																			5
																																			5
																																			5
																																			5
																																			5
																																			5
																																			5
																																			5
																																			5
																																			5
																																			5
																																			F
																																			5
																																			5
																																			5
																																			5
																																			2
																																			2
																																			2
																																			5
																																			5
																																			5
																																			5
																																			2
																																			2
																																			5
																																			5
																																			5
																																			5
																																			5
																																			5
																																			5
																																			5
																																			5
																																			F
																																			F
																																			5
																																			5
																																			5
																																			5
																																			5
																																			5
																																			5
																																			5
																																			5
																																			5
																																			5
																																			5
																																			F
																																			F
																																			5
																																			5 or F
																																			5
																																			F
																																			F
																																			F
																																			F
																																			F
																																			5
																																			5
																																			5
																																			5
																																			5
																																			5
																																			5
																																			5
																																			5
																																			5
																																			5
																																			5
																																			5
																																			5
																																			5
																																			F
																																			F
																																			F
																																			F
																																			5
																																			5
																																			5
																																			5
																																			5
																																			5
																																			5
																																			F
																																			F
																																			5 or F
																																			F
																																			F
																																			5
																																			5
																																			F
																																			F
																																			5
																																			F
																																			R
																																			F
																																			F
																																			F
																																			F
																																			F
																																			F
																																			F
																																			F
																																			F
																																			5
																																			5
																																			F
																																			5
																																			5
																																			F
																																			F
																																			F
																																			F
																																			5
																																			5 or R
																																			5
																																			5
																																			5
																																			5
																																			5
																																			5
																																			5
																																			5
																																			5
																																			5
																																			5
																																			5
																																			5
																																			5
																																			5
																																			5
																																			5
																																			5
																																			5
																																			5
																																			5
																																			5
																																			5
																																			5
																																			5
																																			5
																																			5
																																			5
																																			5
																																			F
																																			5
																																			5
																																			5
																																			5
																																			5
																																			5
																																			5
																																			5
																																			5
																																			5
																																			5
																																			5
																																			5
																																			5
																																			5
																																			5
																																			5
																																			5
																																			5
																																			5
																																			5
																																			5
																																			5
																																			5
																																			5
																																			5
																																			5
																																			5
																																			5
																																			5
																																			5
																																			2
																																			5
																																			5
																																			5
																																			5
																																			5
																																			3
																																			5
																																			5
																																			5
																																			5
																																			5
																																			D
																																			5
																																			5
																																			5
																																			5
																																			5
																																			5
																																			5
																																			5
																																			D
																																			5
																																			5
																																			5
																																			5
																																			5
																																			5
																																			5
																																			5
																																			5
																																			5
																																			5

## Sheet: New Tables
Table 1
State	Subject Tested	Type of assessment (date)	Number of items
Massachusetts	Biology	Released (Spring 2024)	63
New York	Biology	Released (June 2025)	85
North Carolina	Biology	Released (2025)	50
Subtotal Items			198
California	Multiple sciences	Practice (2022)	68
Illinois	Multiple sciences	Practice (2025-2026)	40
Texas	Biology	Practice (2025)	47
Florida	Biology	Sample (2024)	12
Subtotal Items			167
Total Items			365
Table 3
	Mean	Standard deviation
Overall initial agreement (percent)	81.1828	12.3172
Overall final agreement	98.9836	1.12745
Table 4
State	2	3	4	5	D	R	Items with Disagreement	Total Items	% Science for Citizenship
Released Assessments
MA	0	0	0	62	1	0	0	63	0
NY	1	2	0	73	9	0	0	85	0.0352941
NC	1	1	0	46	2	0	0	50	0.04
Subtotals	2	3	0	181	12	0	0	198	0.0752941
Subtotal Percents	0.010101	0.0151515	0	0.914141	0.0606061	0	0
Practice/Sample Assessments
CA	5	0	0	50	12	0	1	68	0.0735294
IL	0	0	0	14	24	1	1	40	0
FL	0	0	0	12	0	0	0	12	0
TX	0	0	0	44	2	0	1	47	0
Subtotals	5	0	0	120	38	1	3	167	0.0735294
Totals	7	3	0	301	50	1	3	365
Total Percents	0.0191781	0.00821918	0	0.824658	0.136986	0.00273973	0.00821918		0.0273973
