# Supplementary material
Source: Research Square preprint supplement (doi:10.21203/rs.3.rs-10305653/v1)

**Texas Biology Test Screenshots**


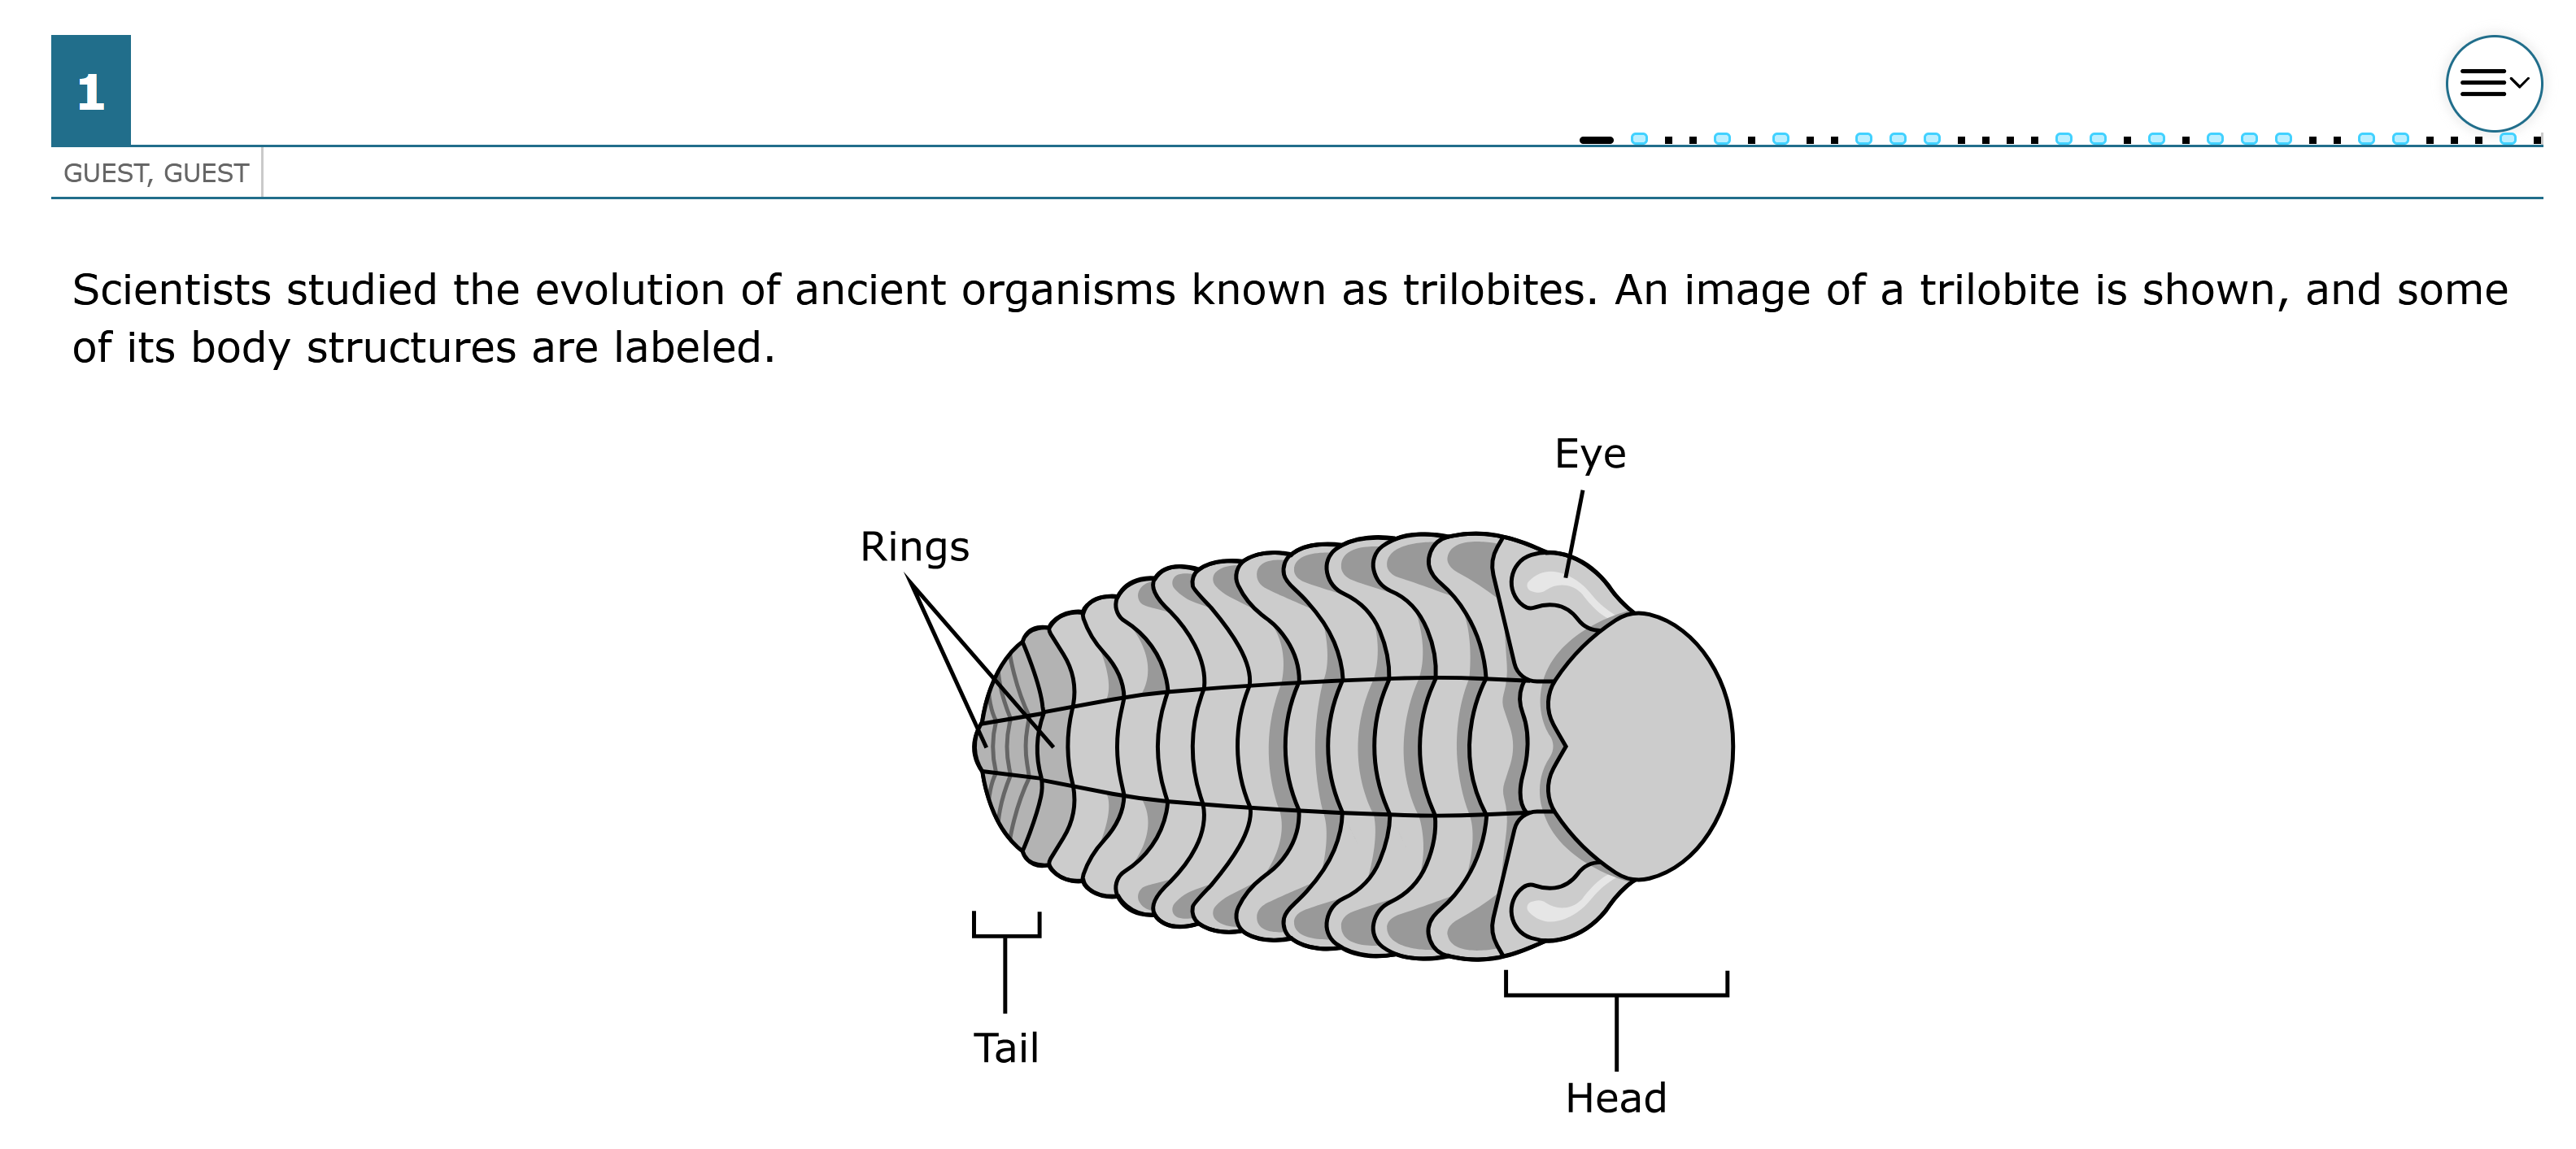


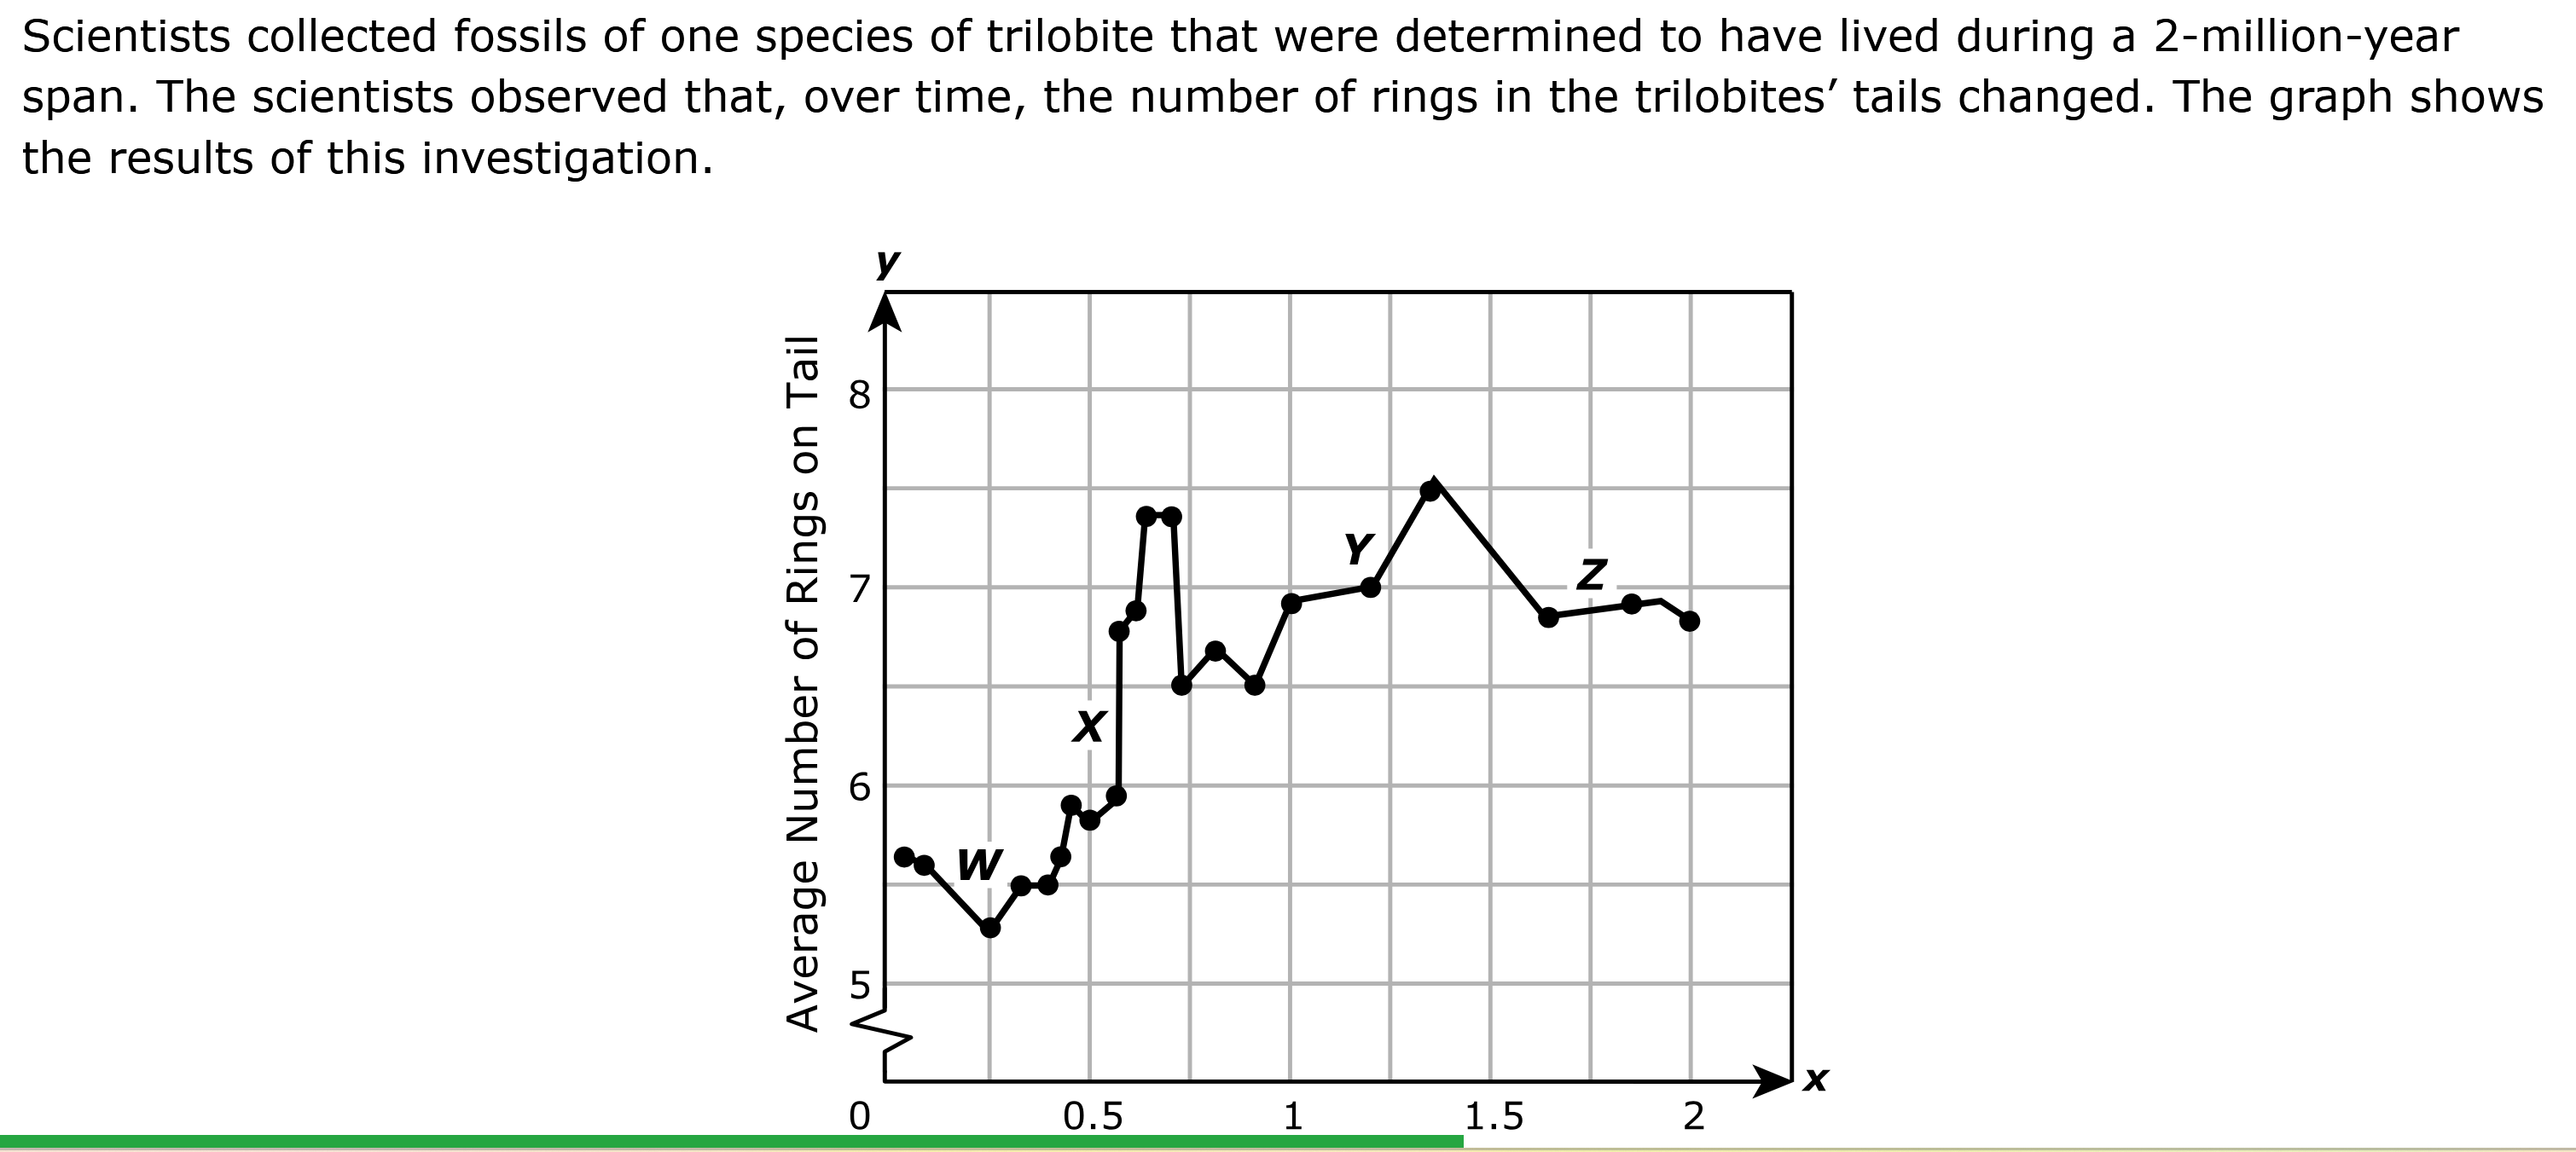


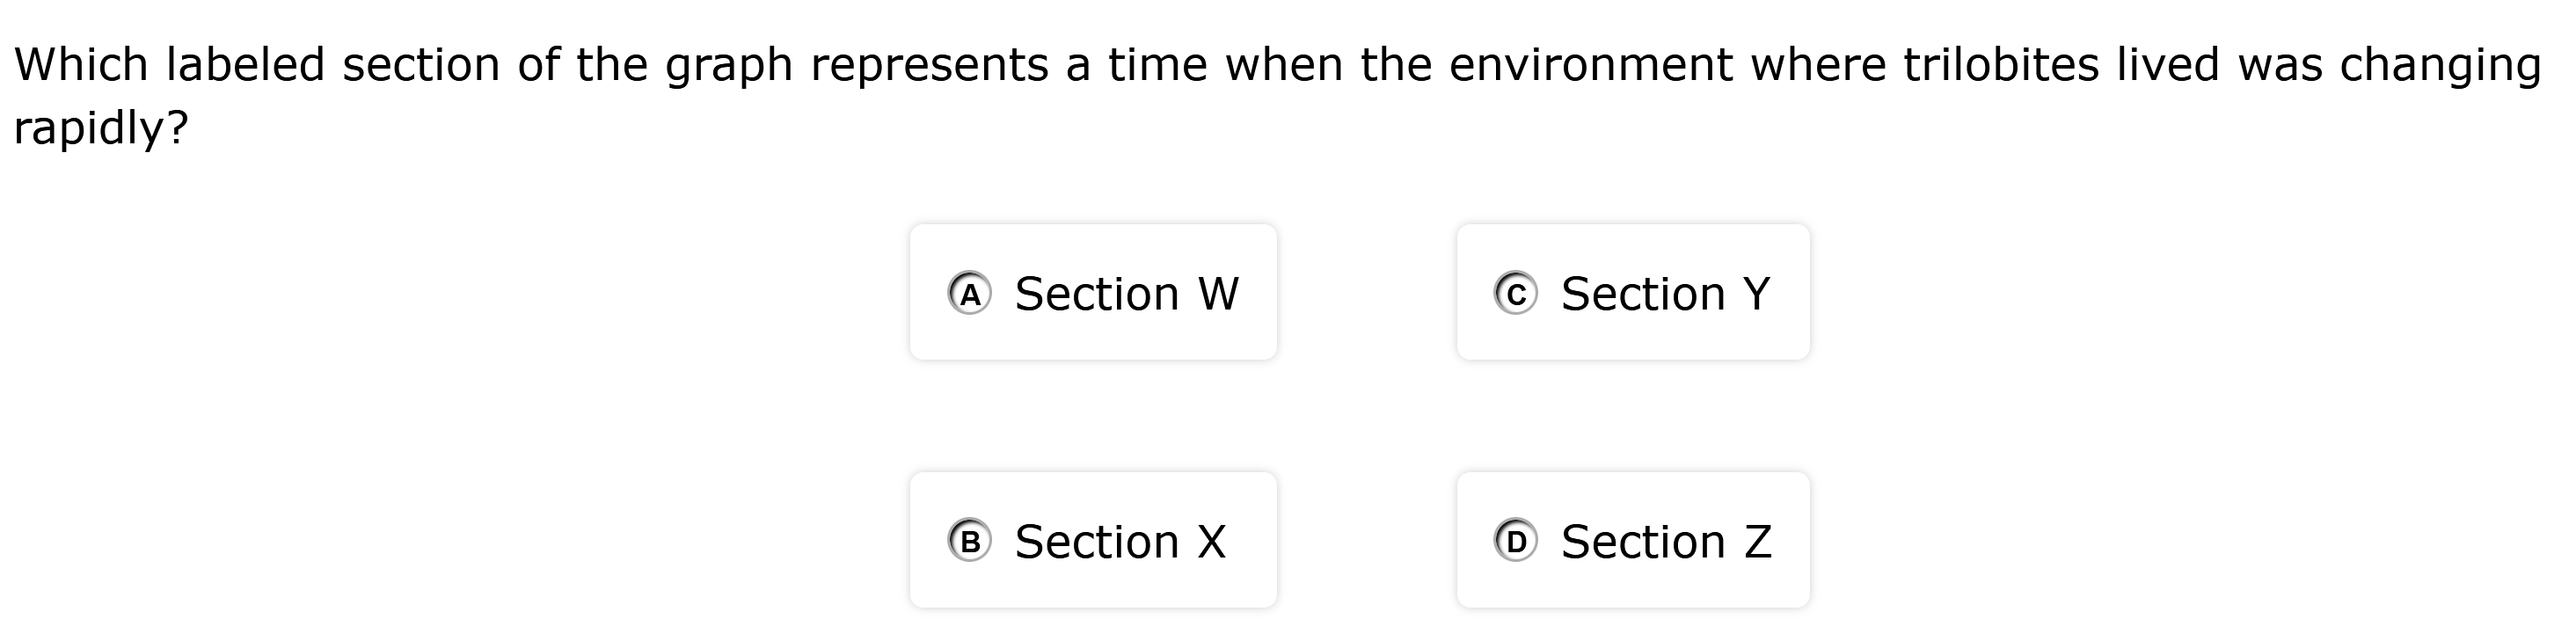


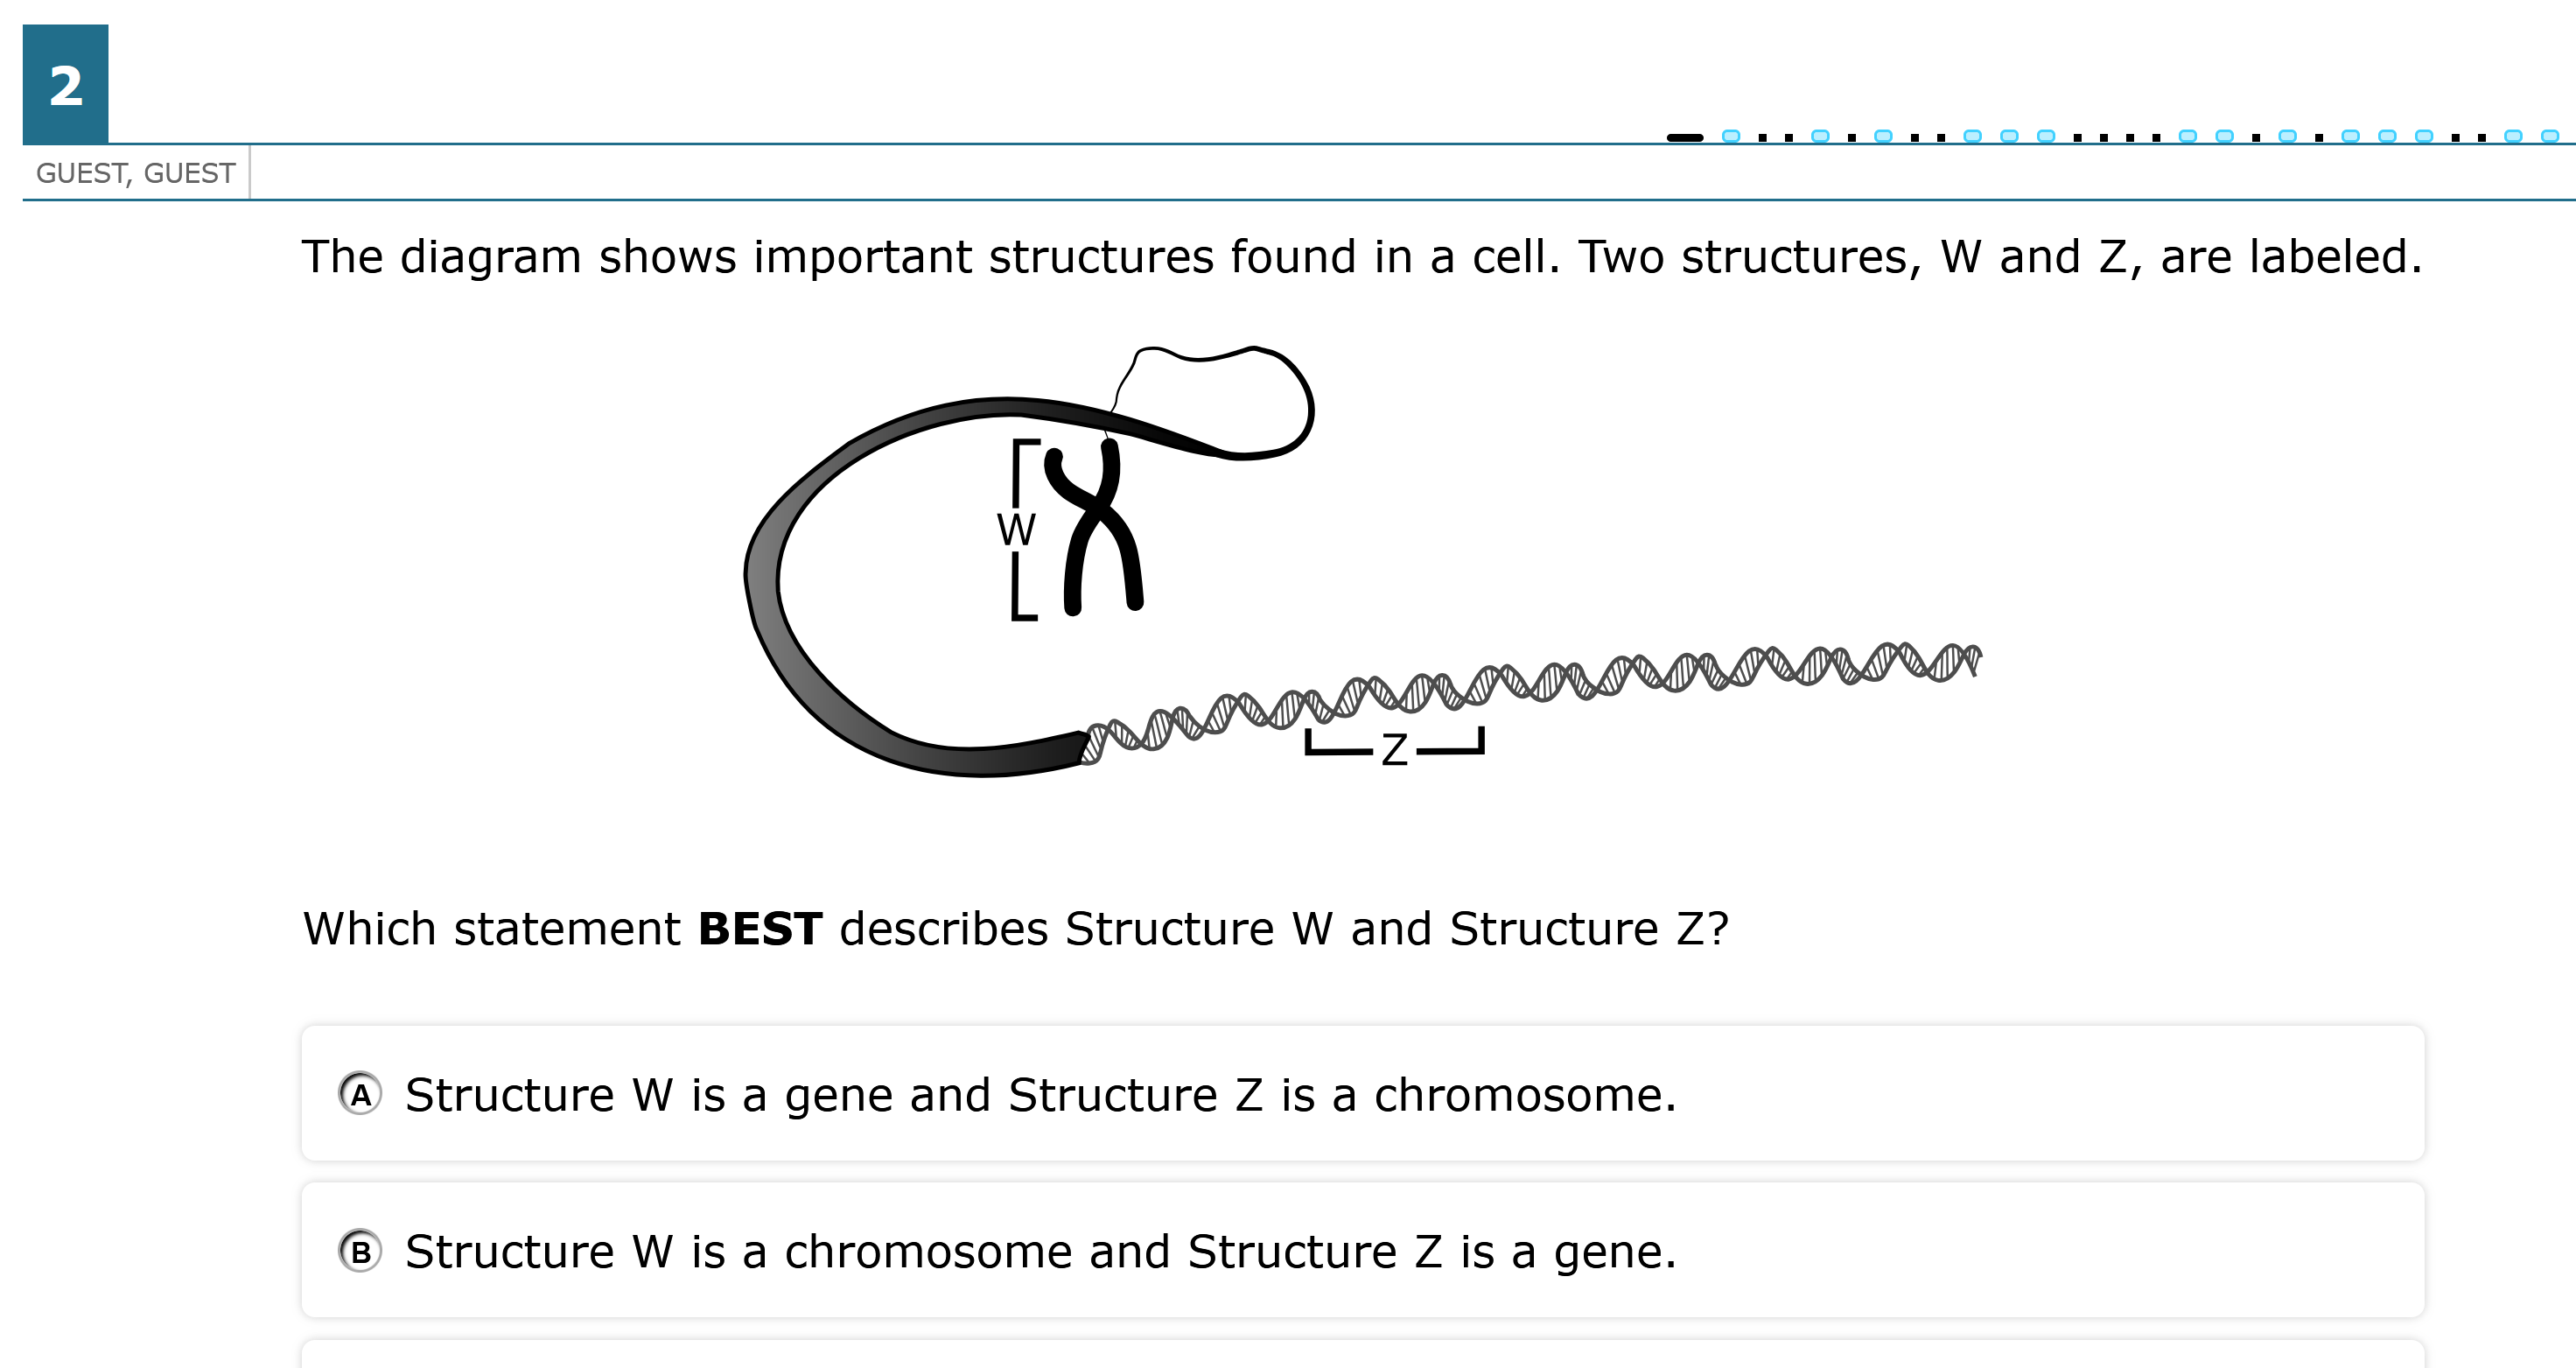


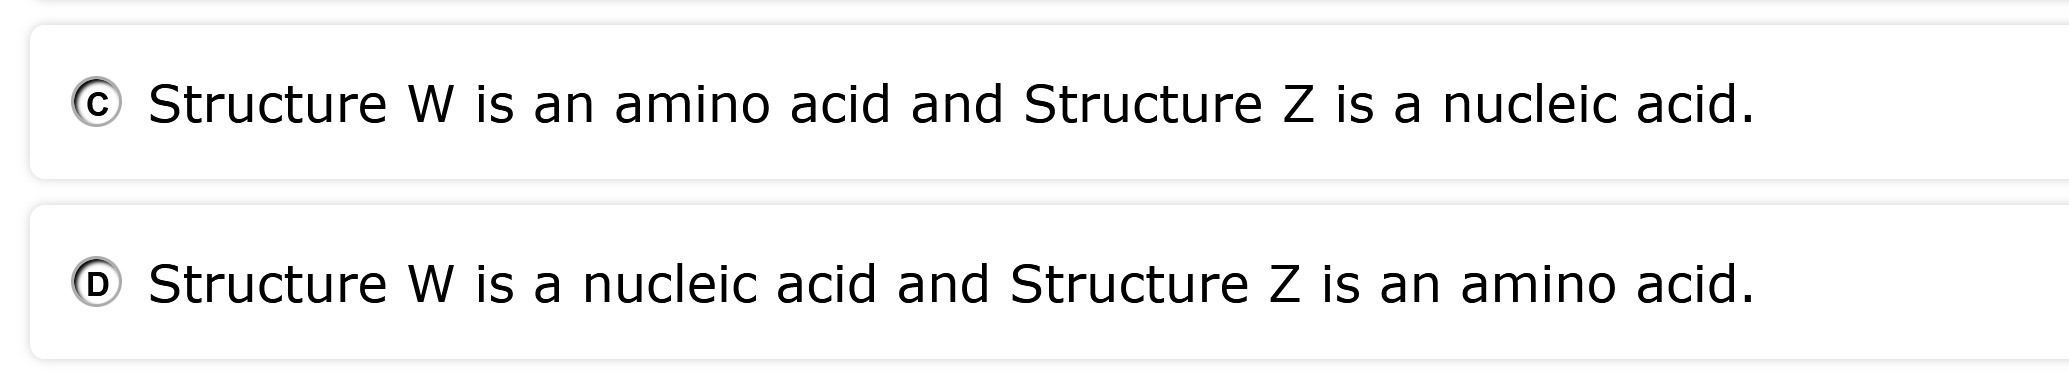


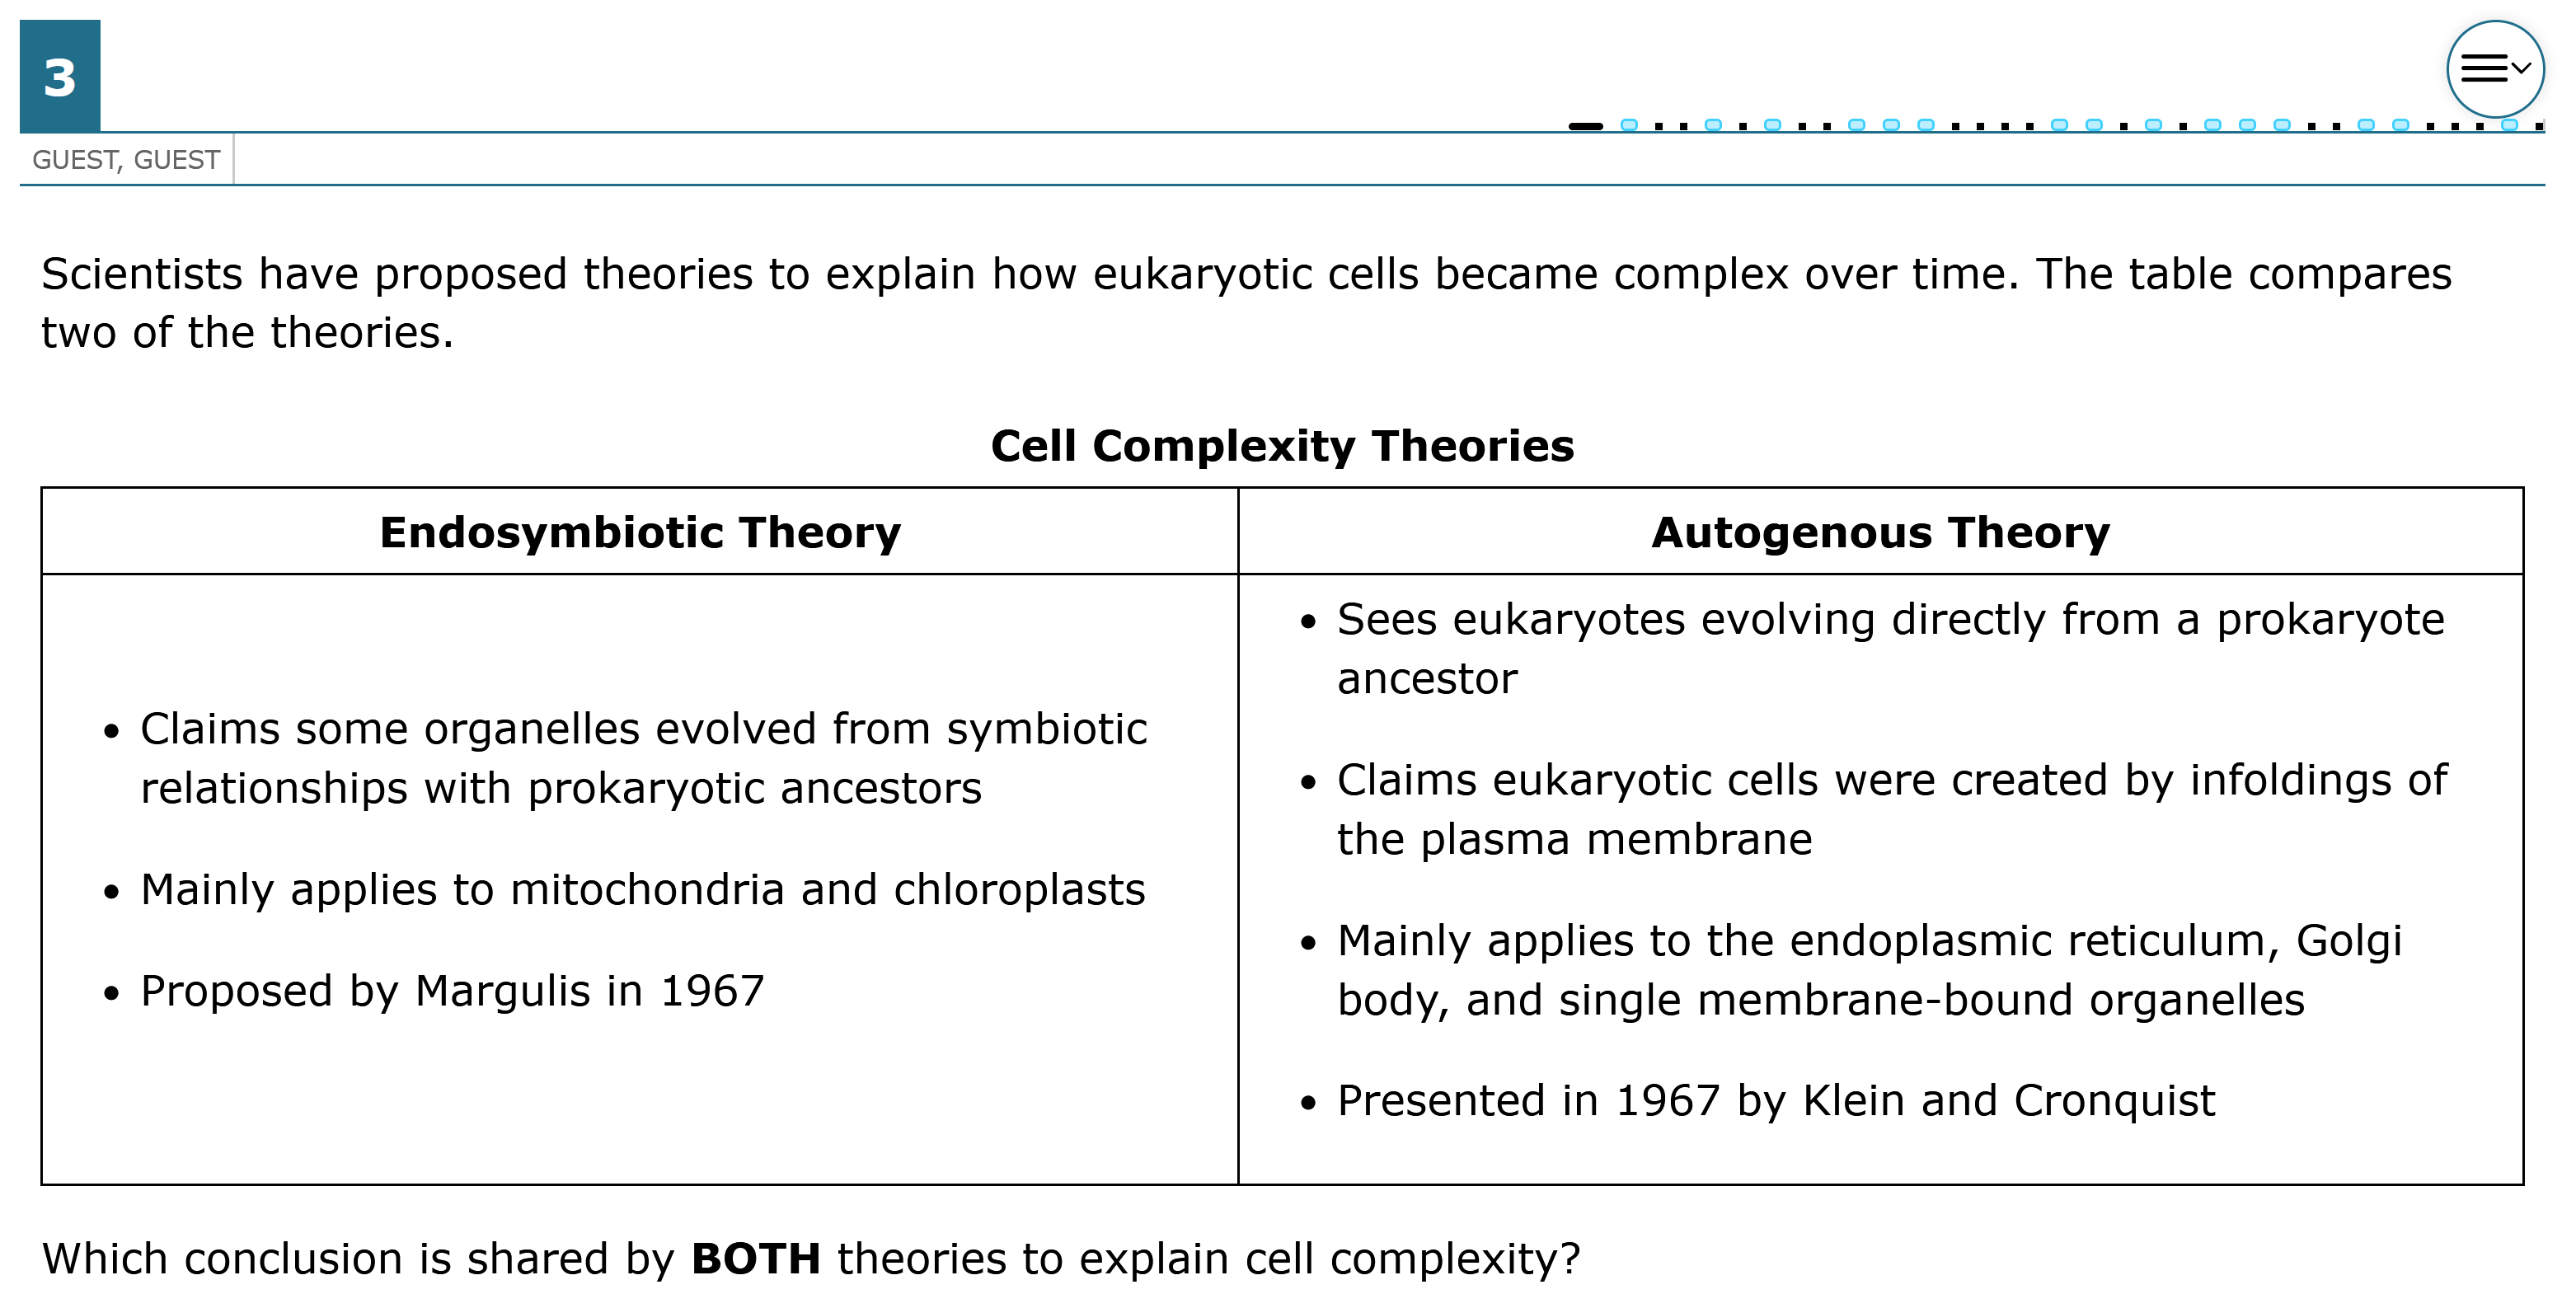


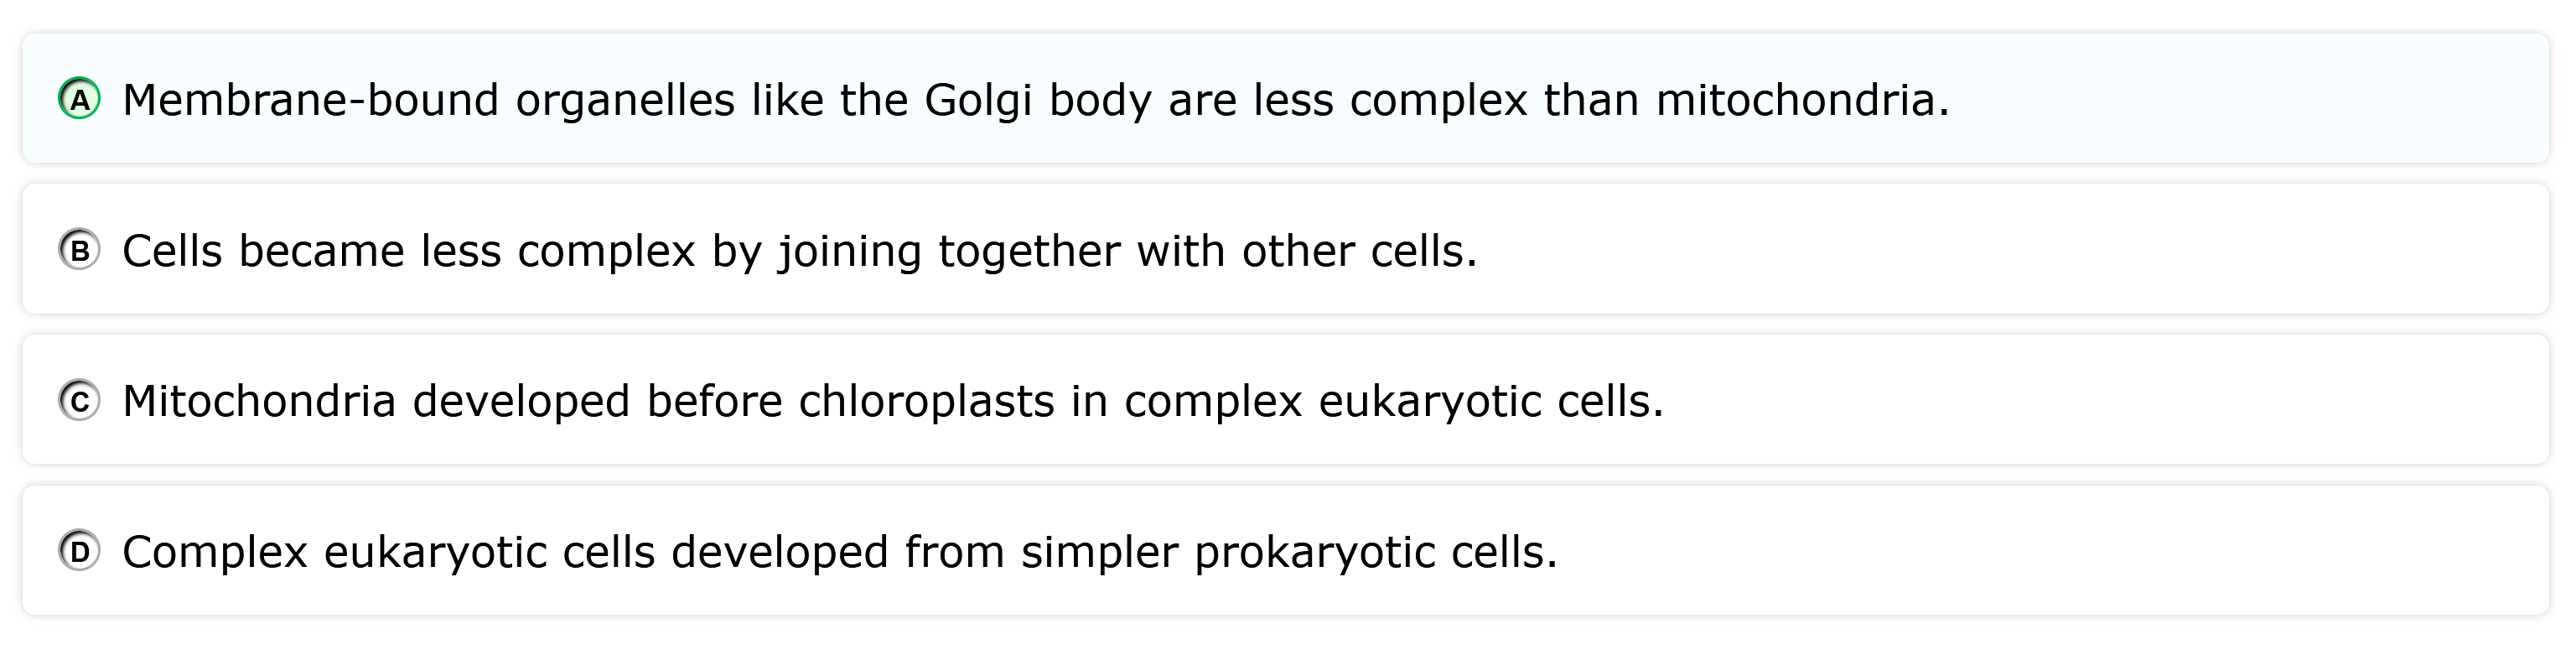


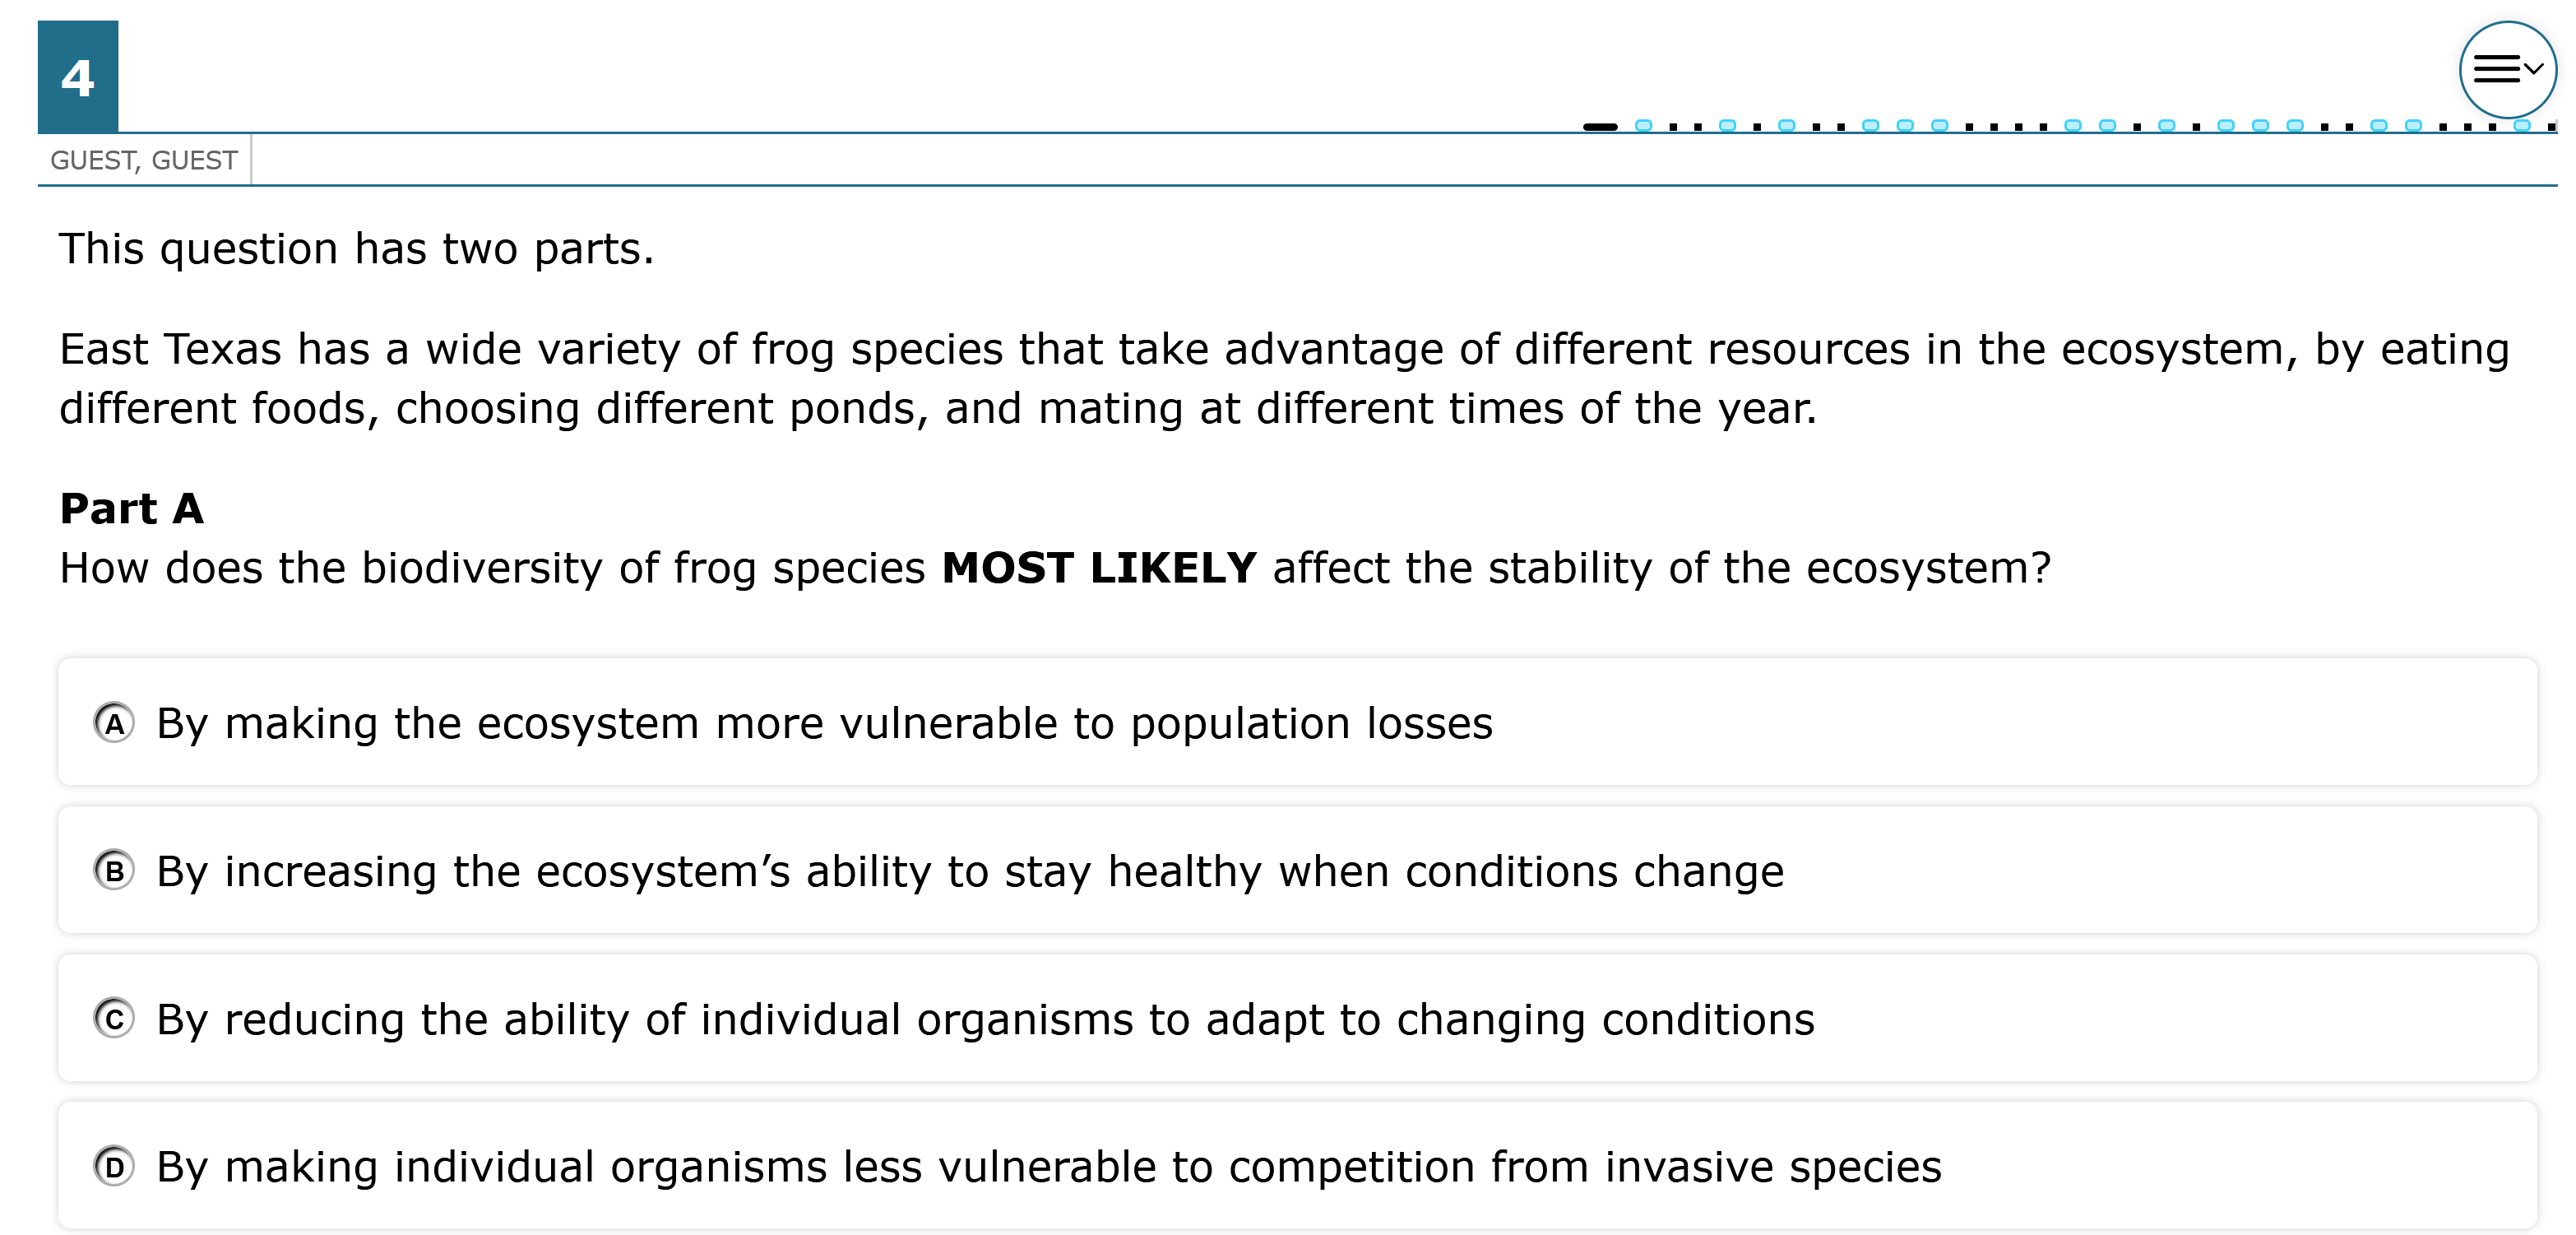


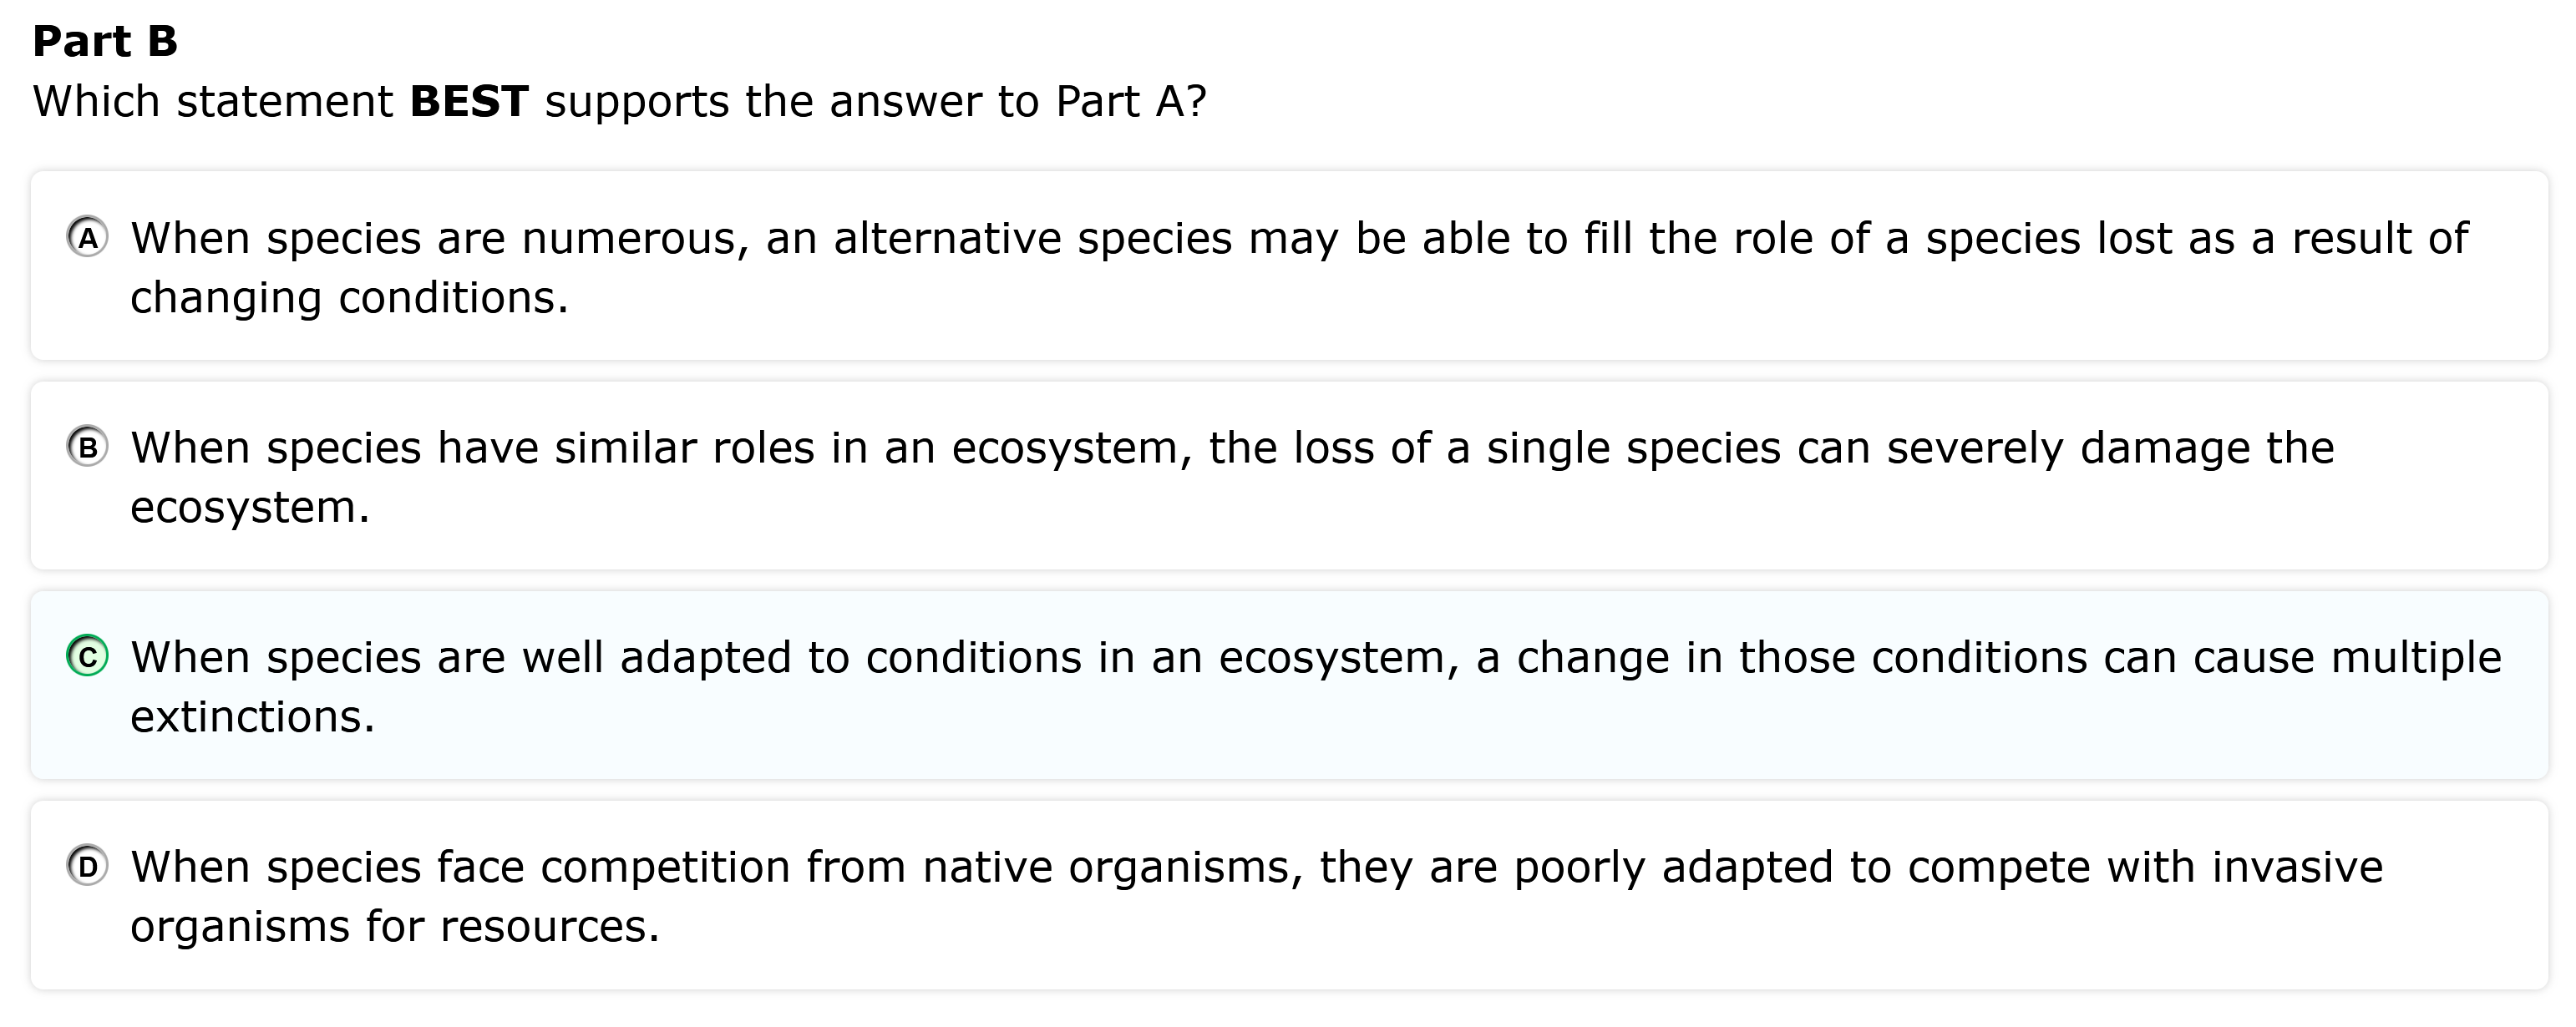


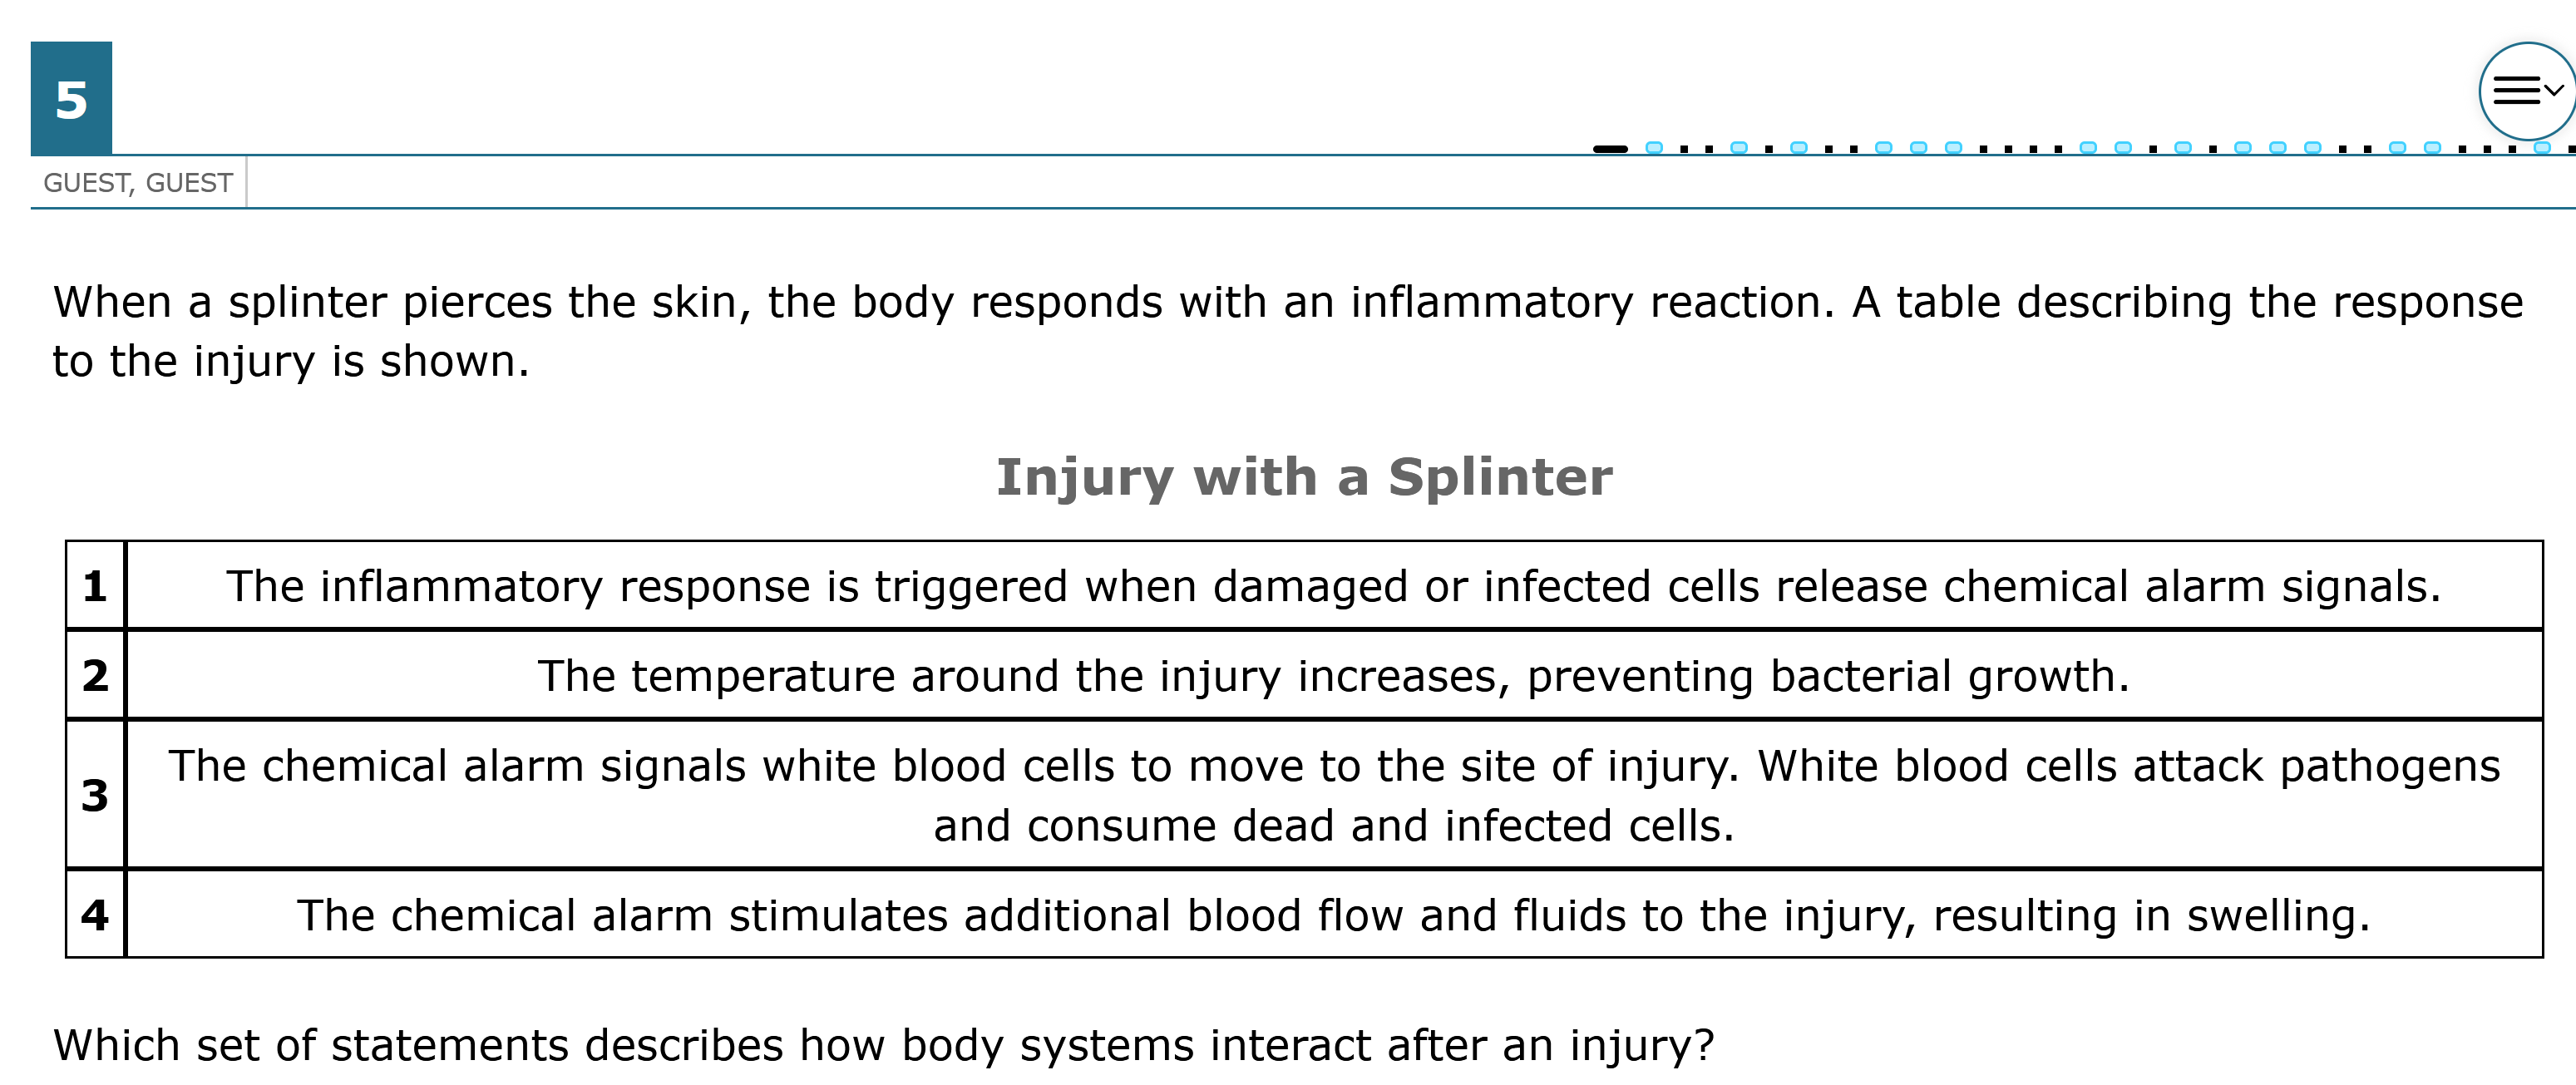


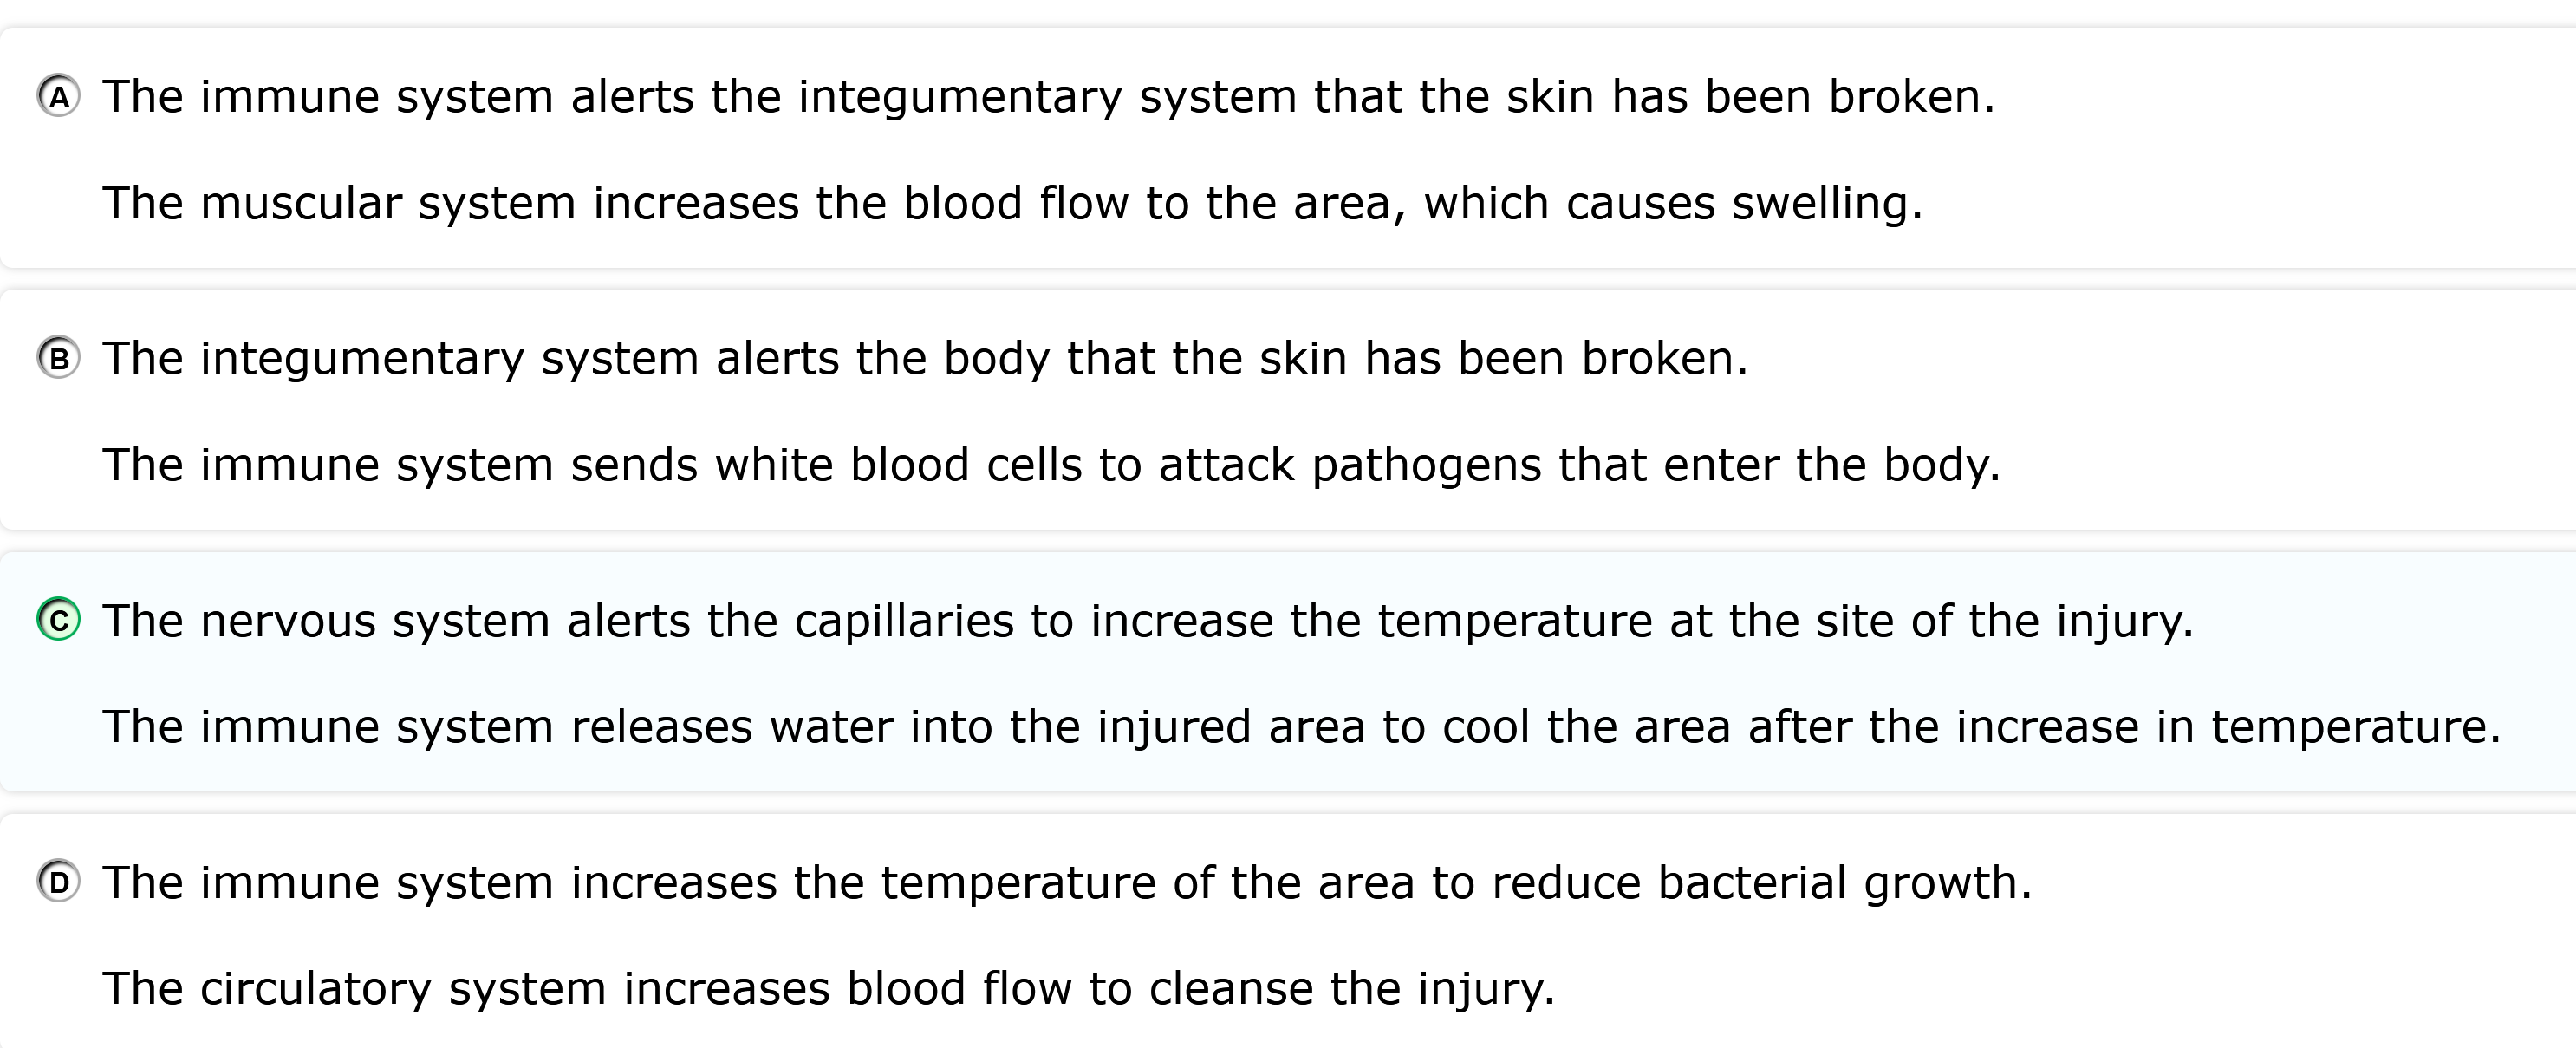


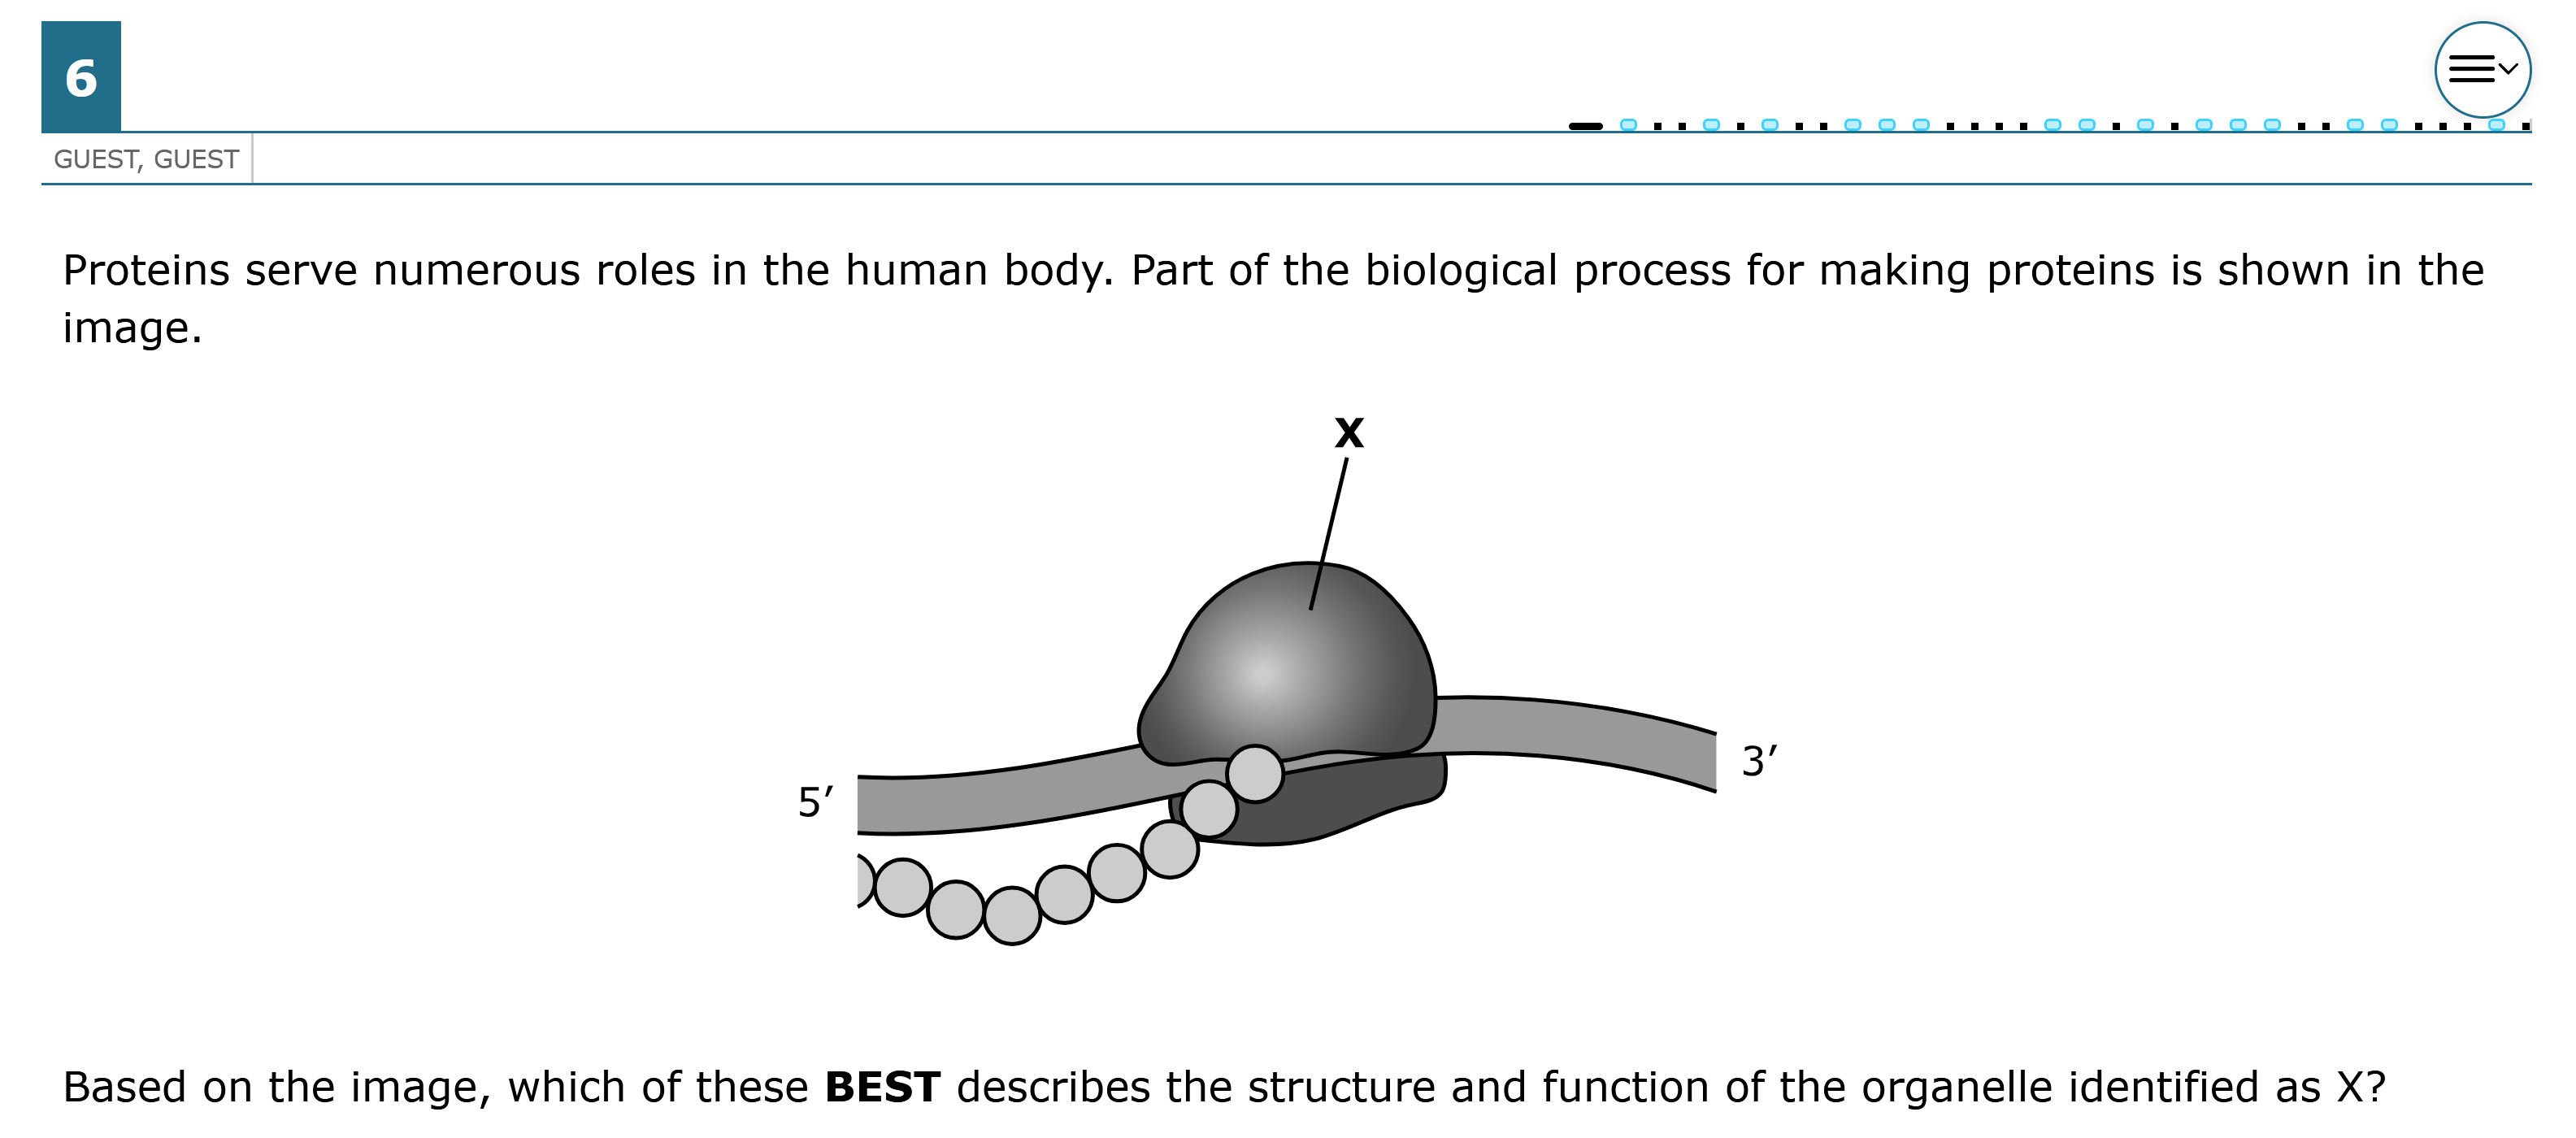


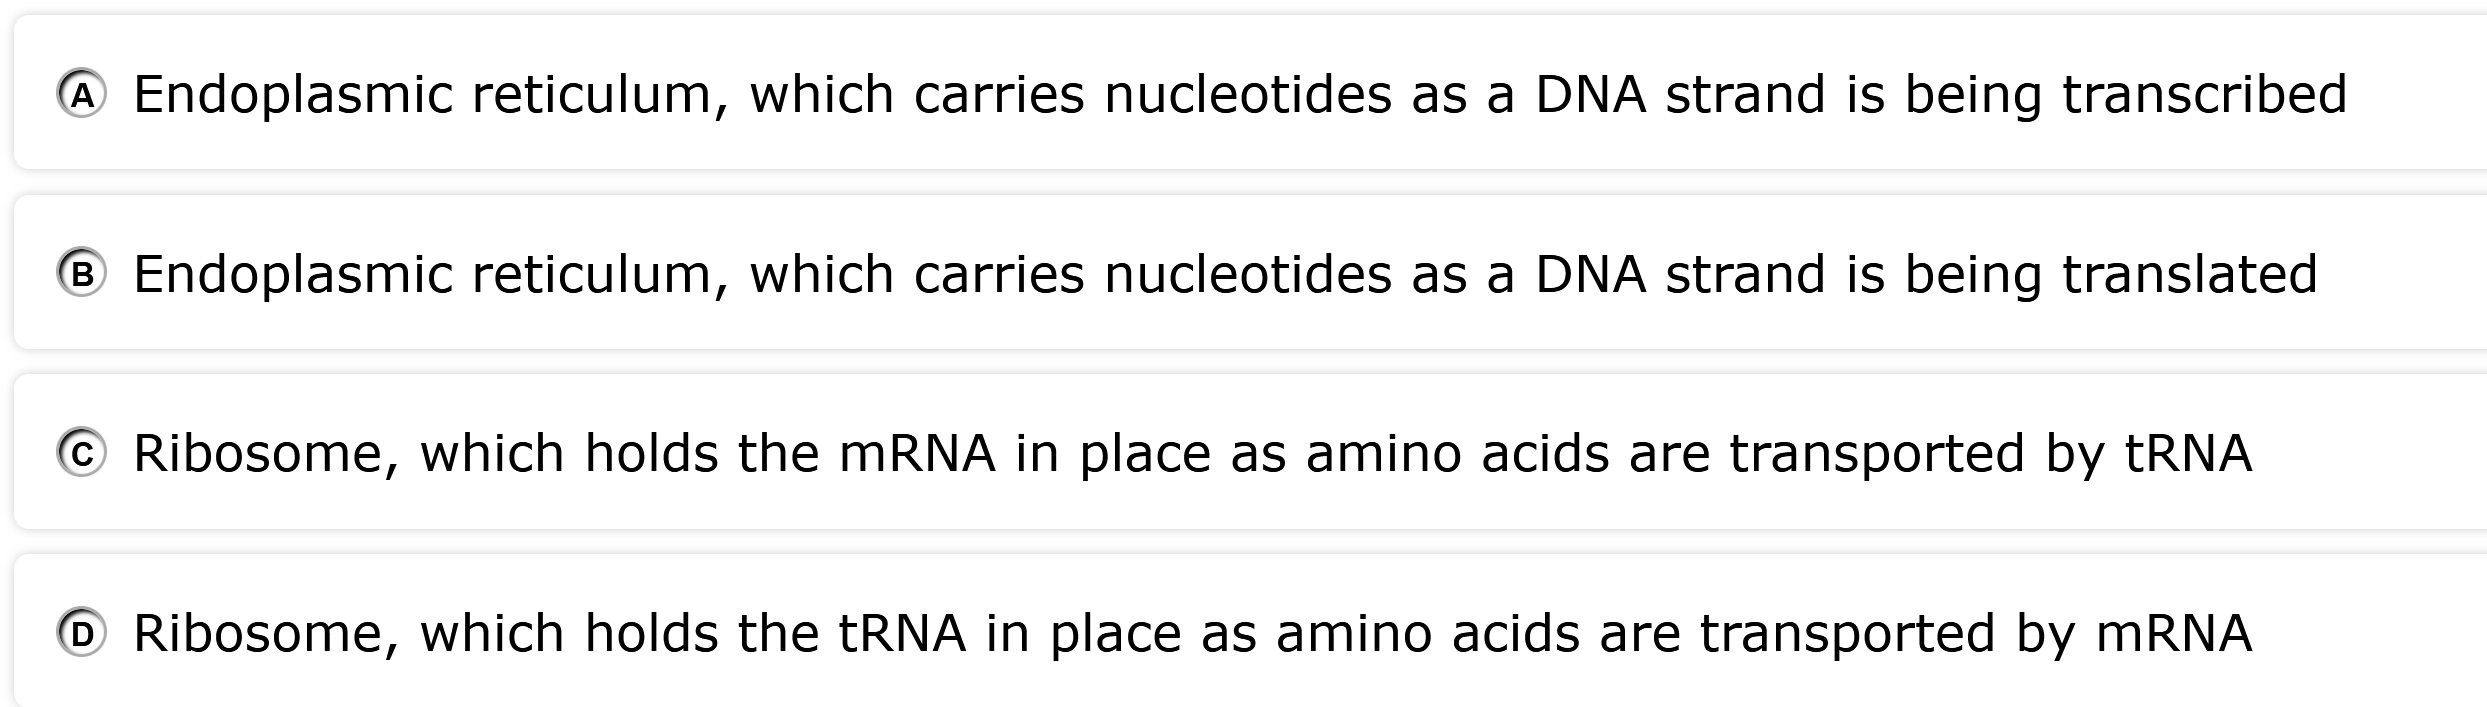


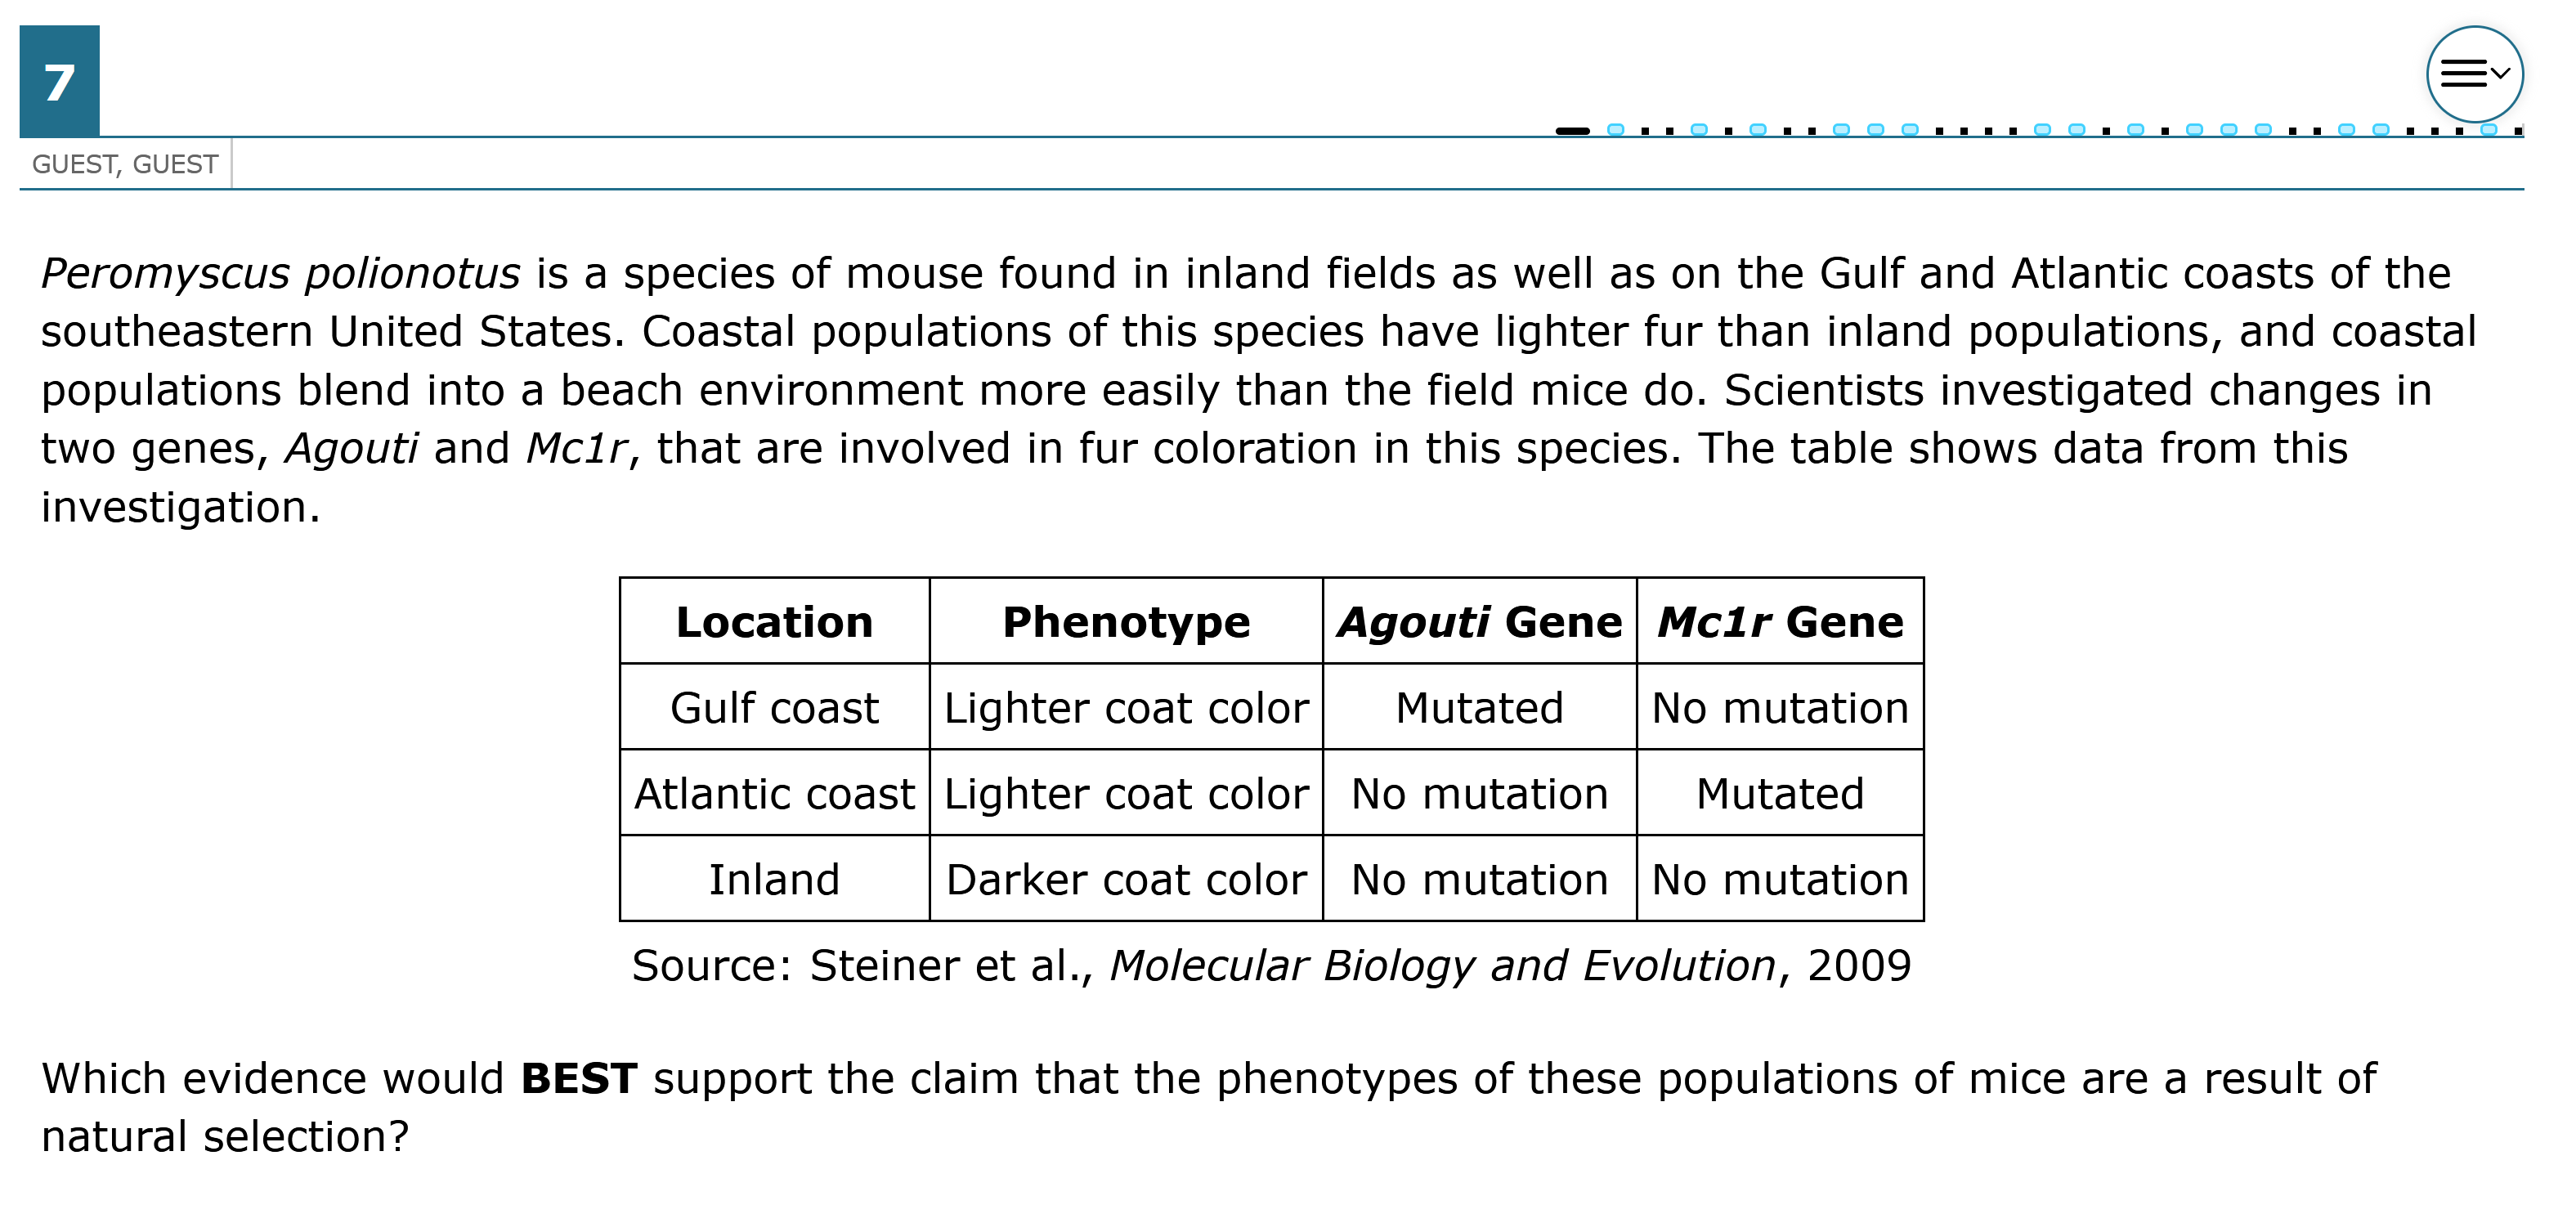


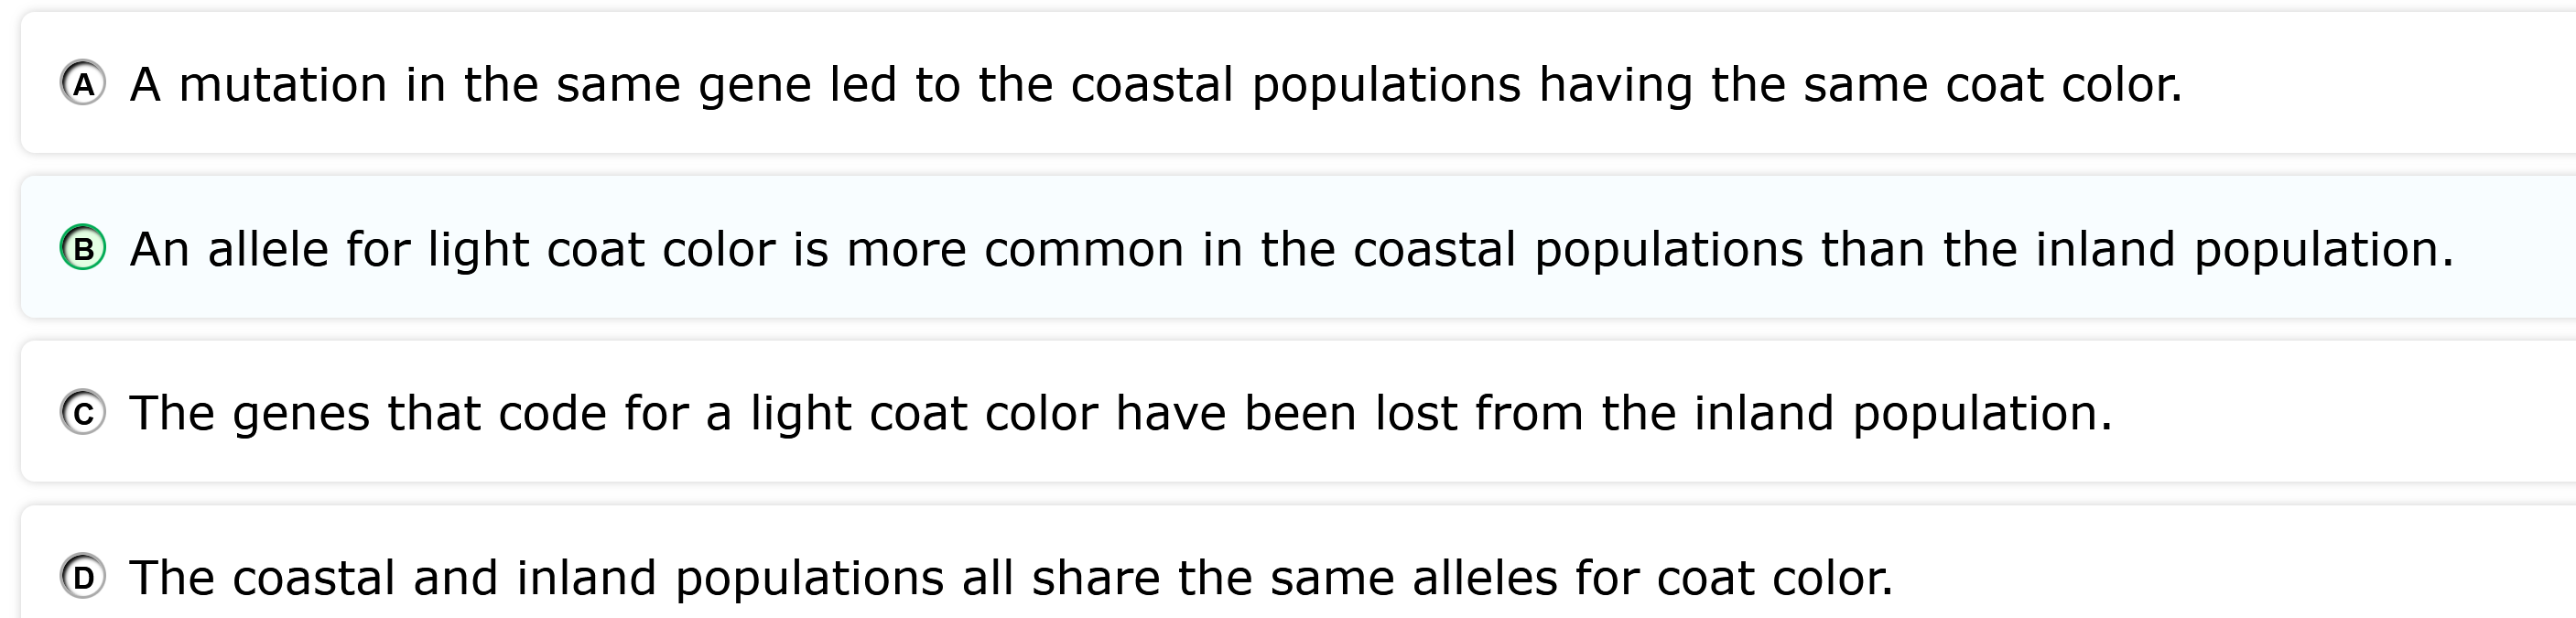


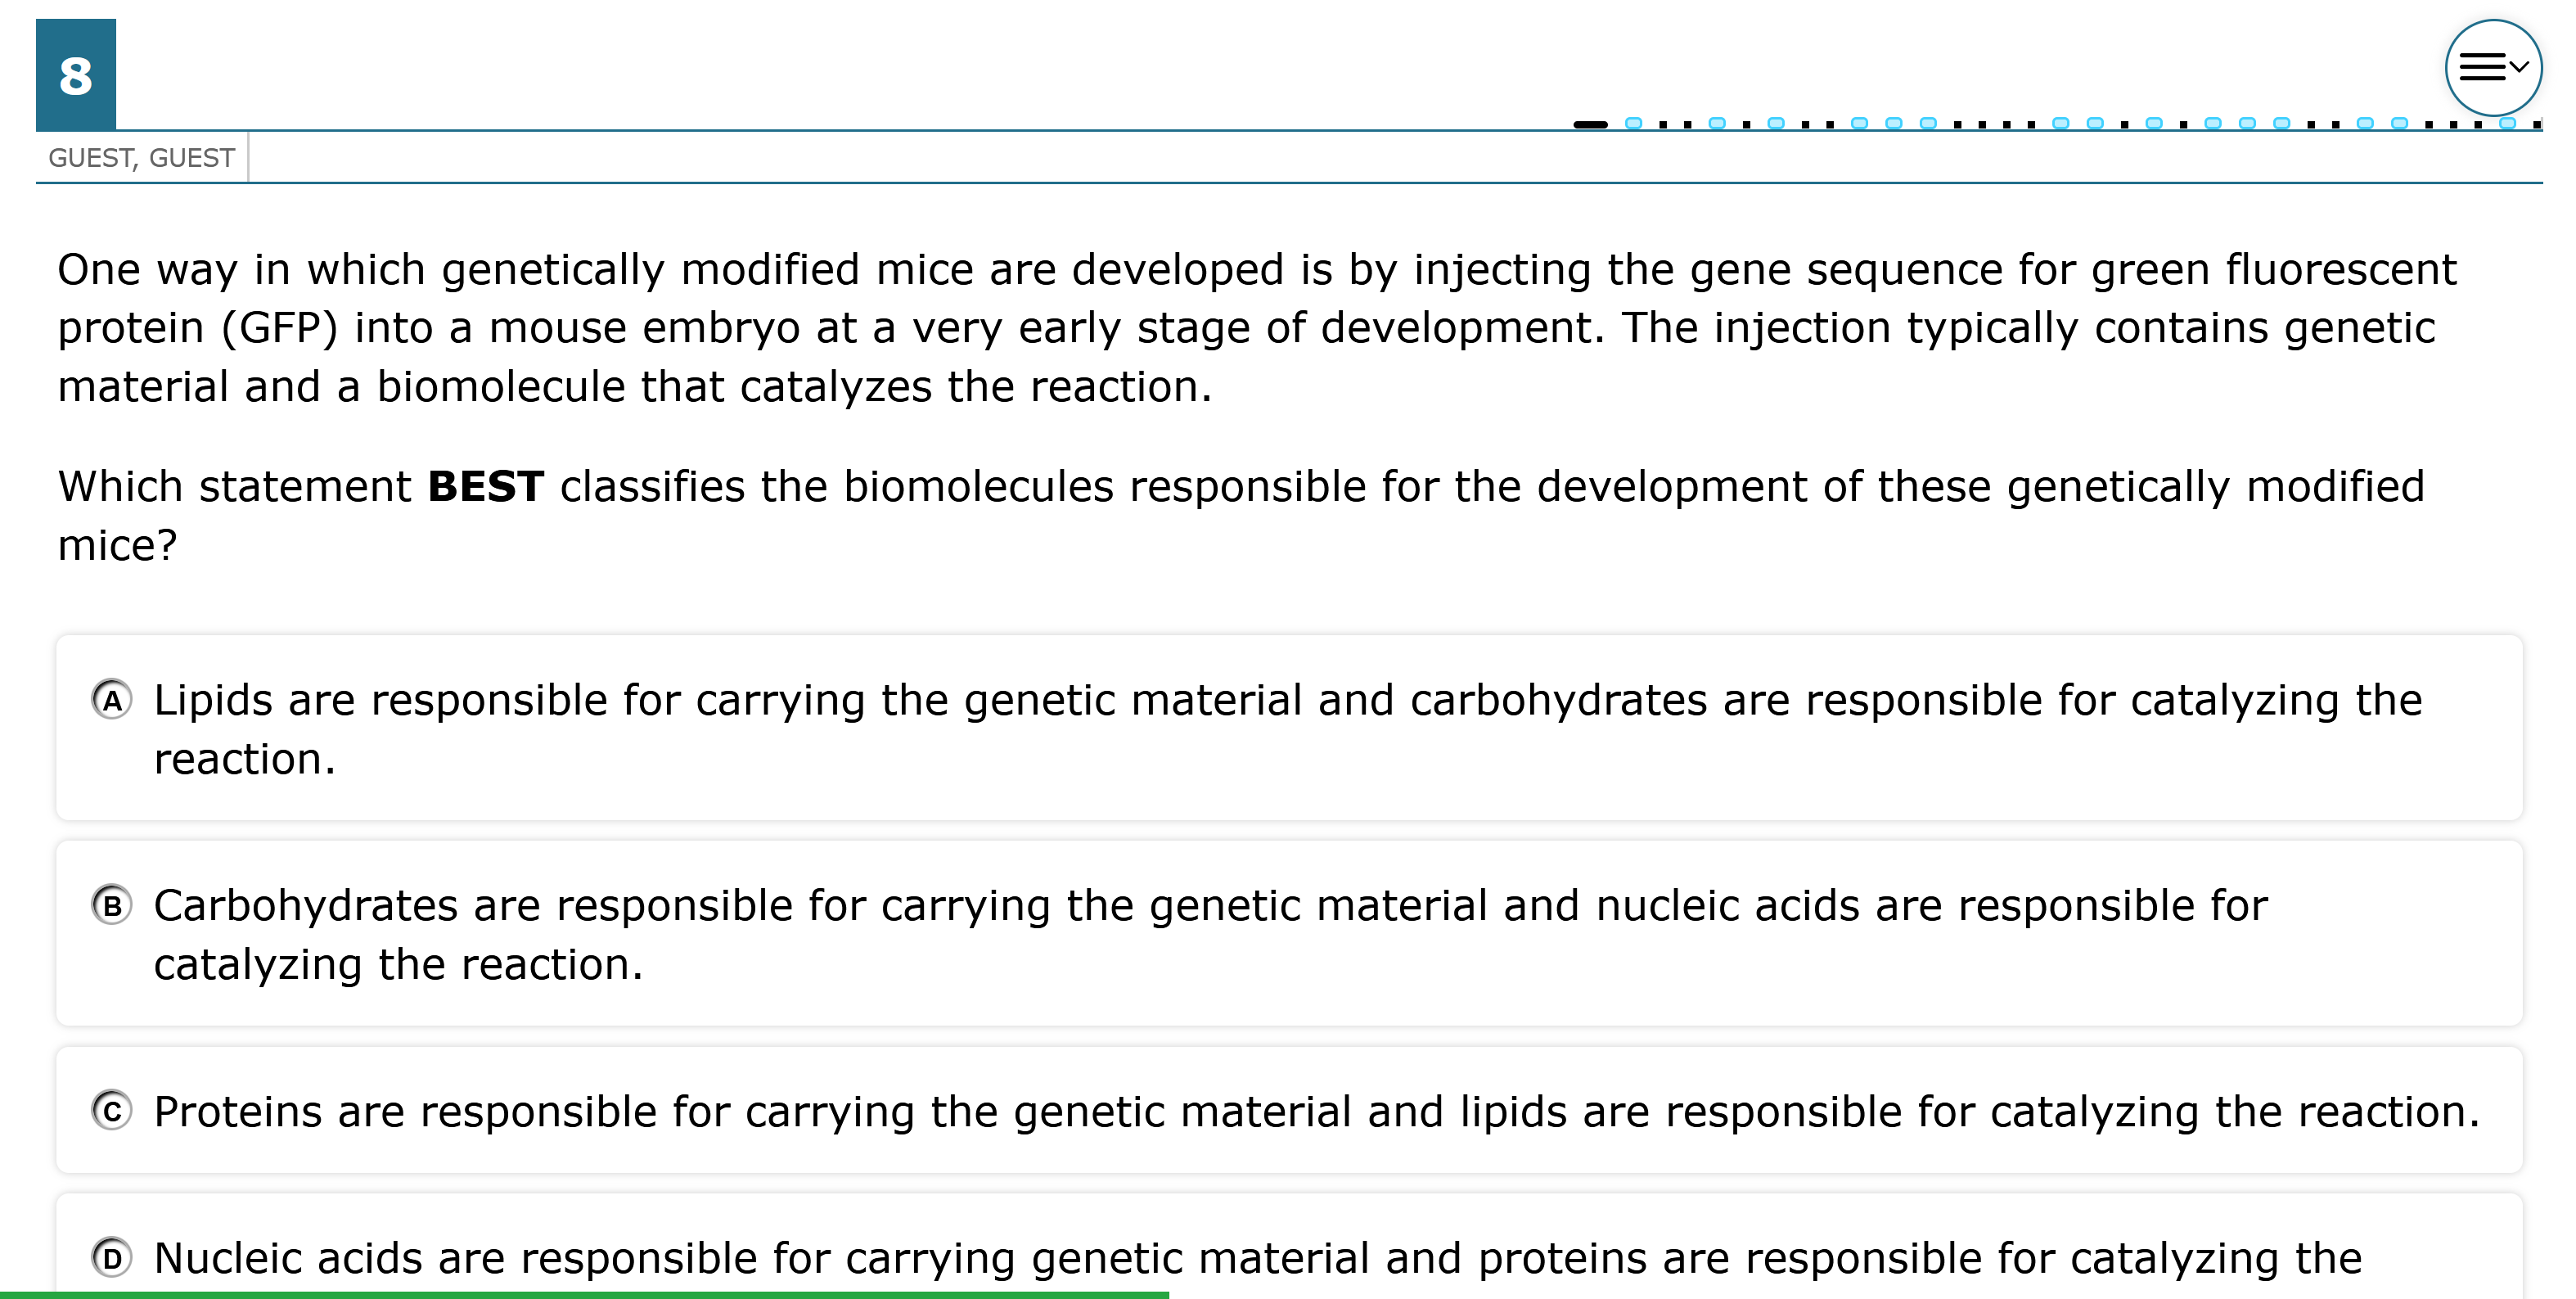


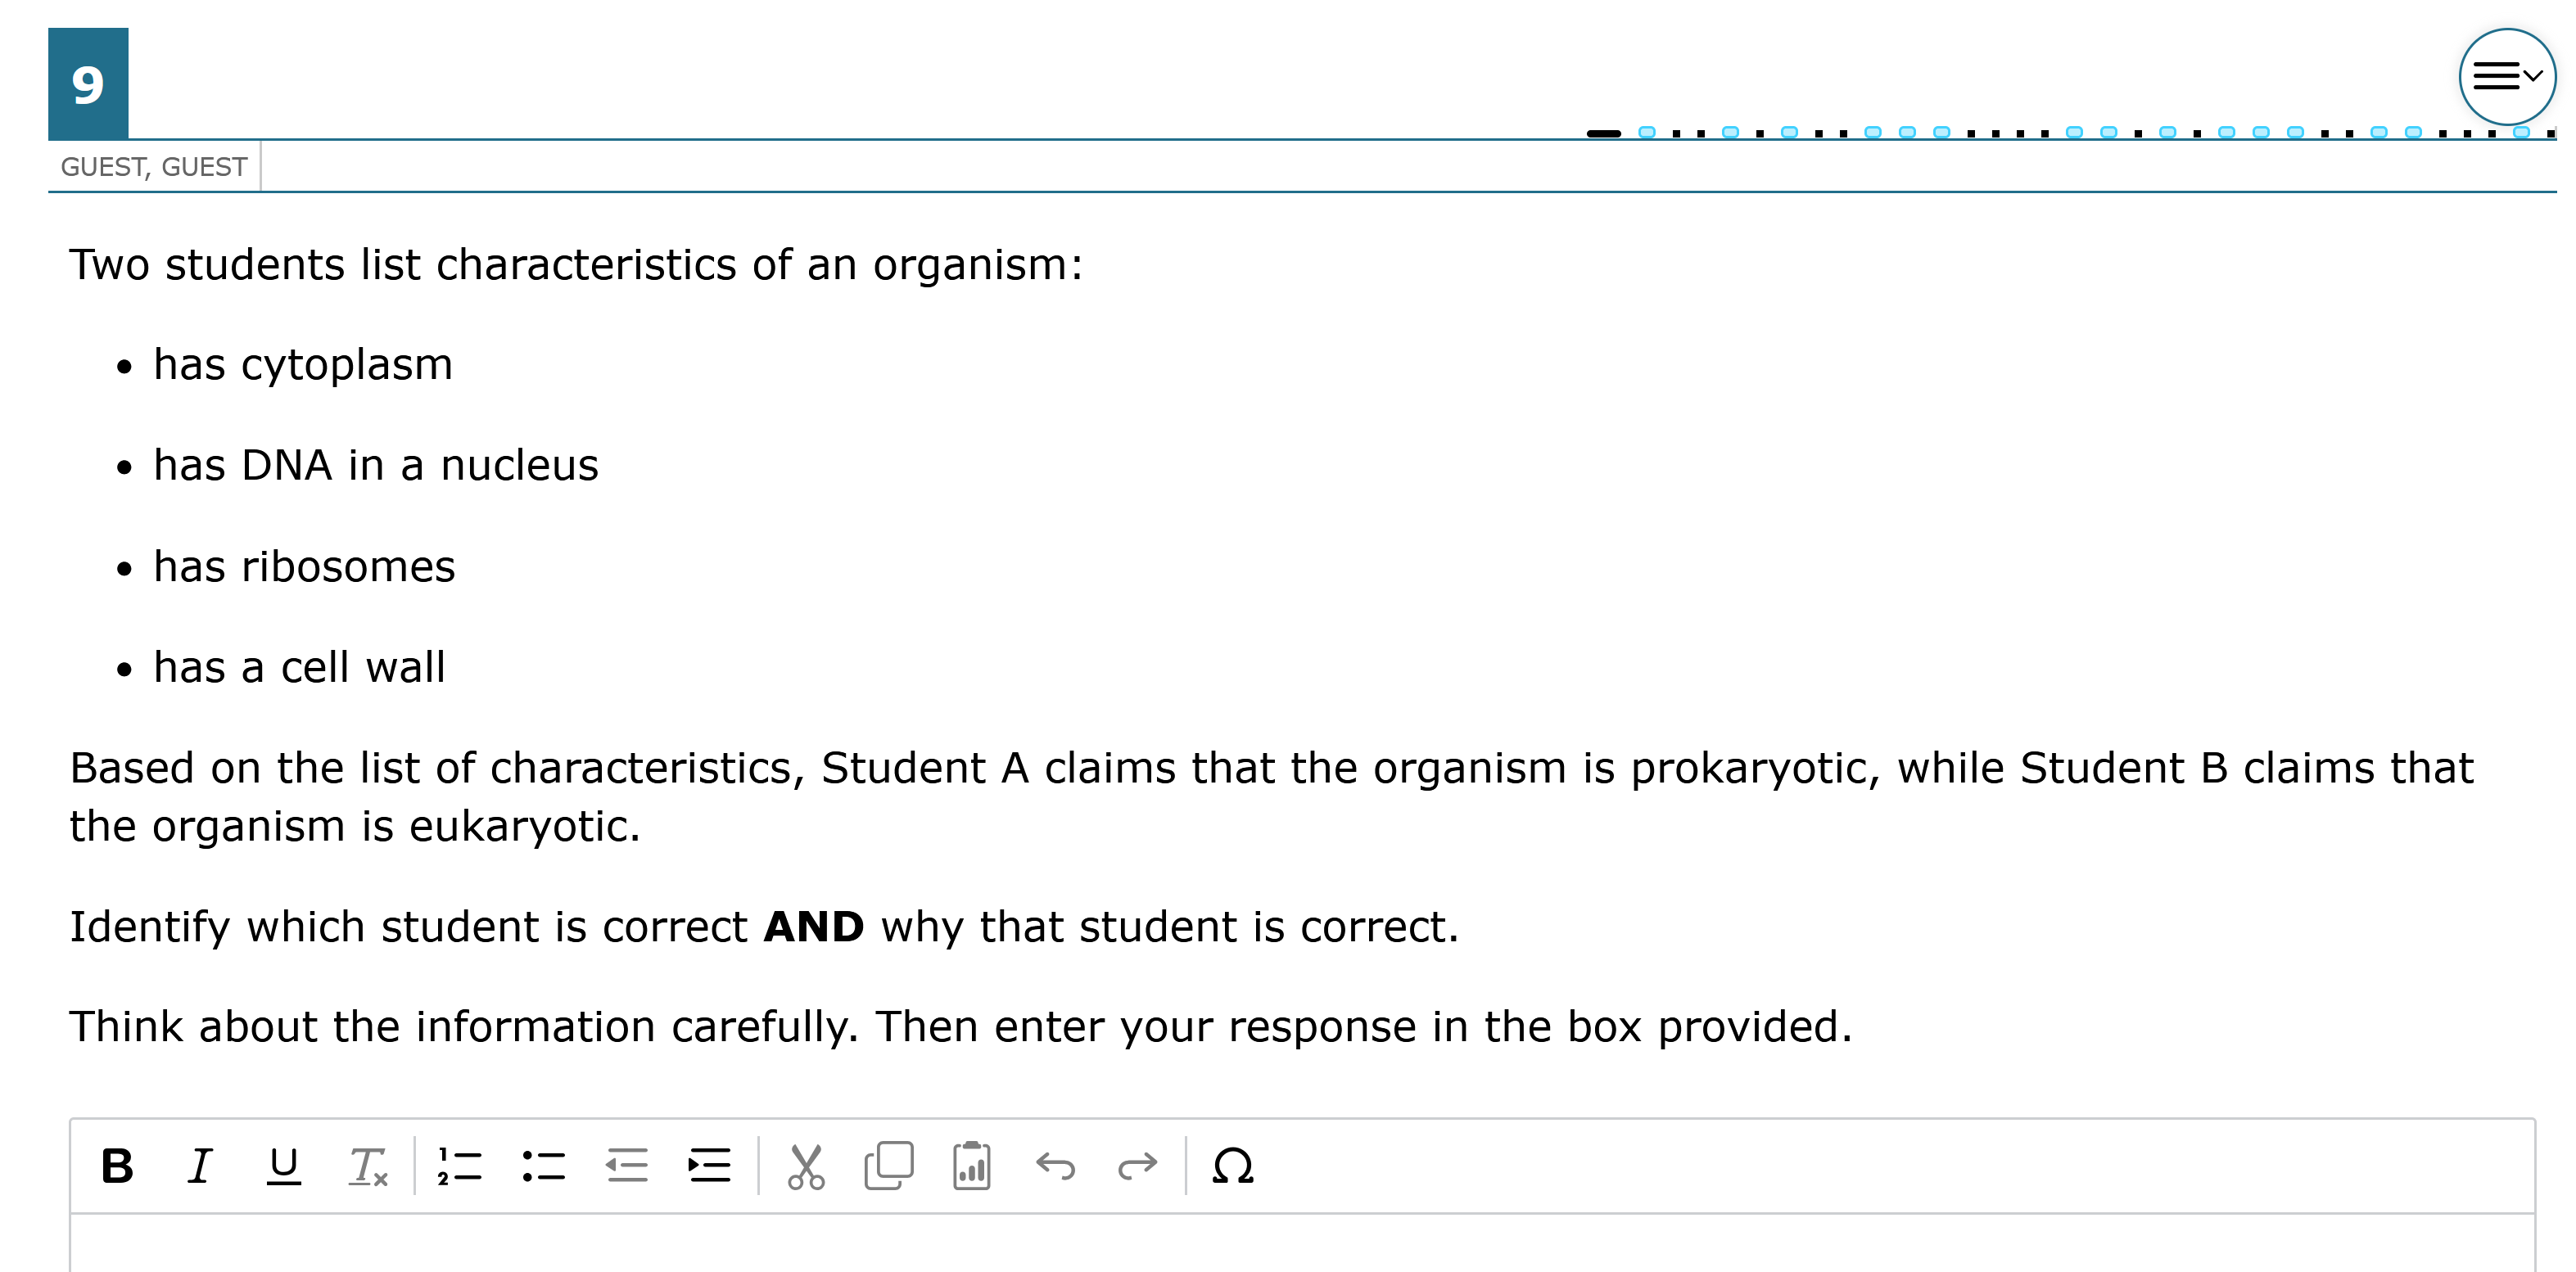


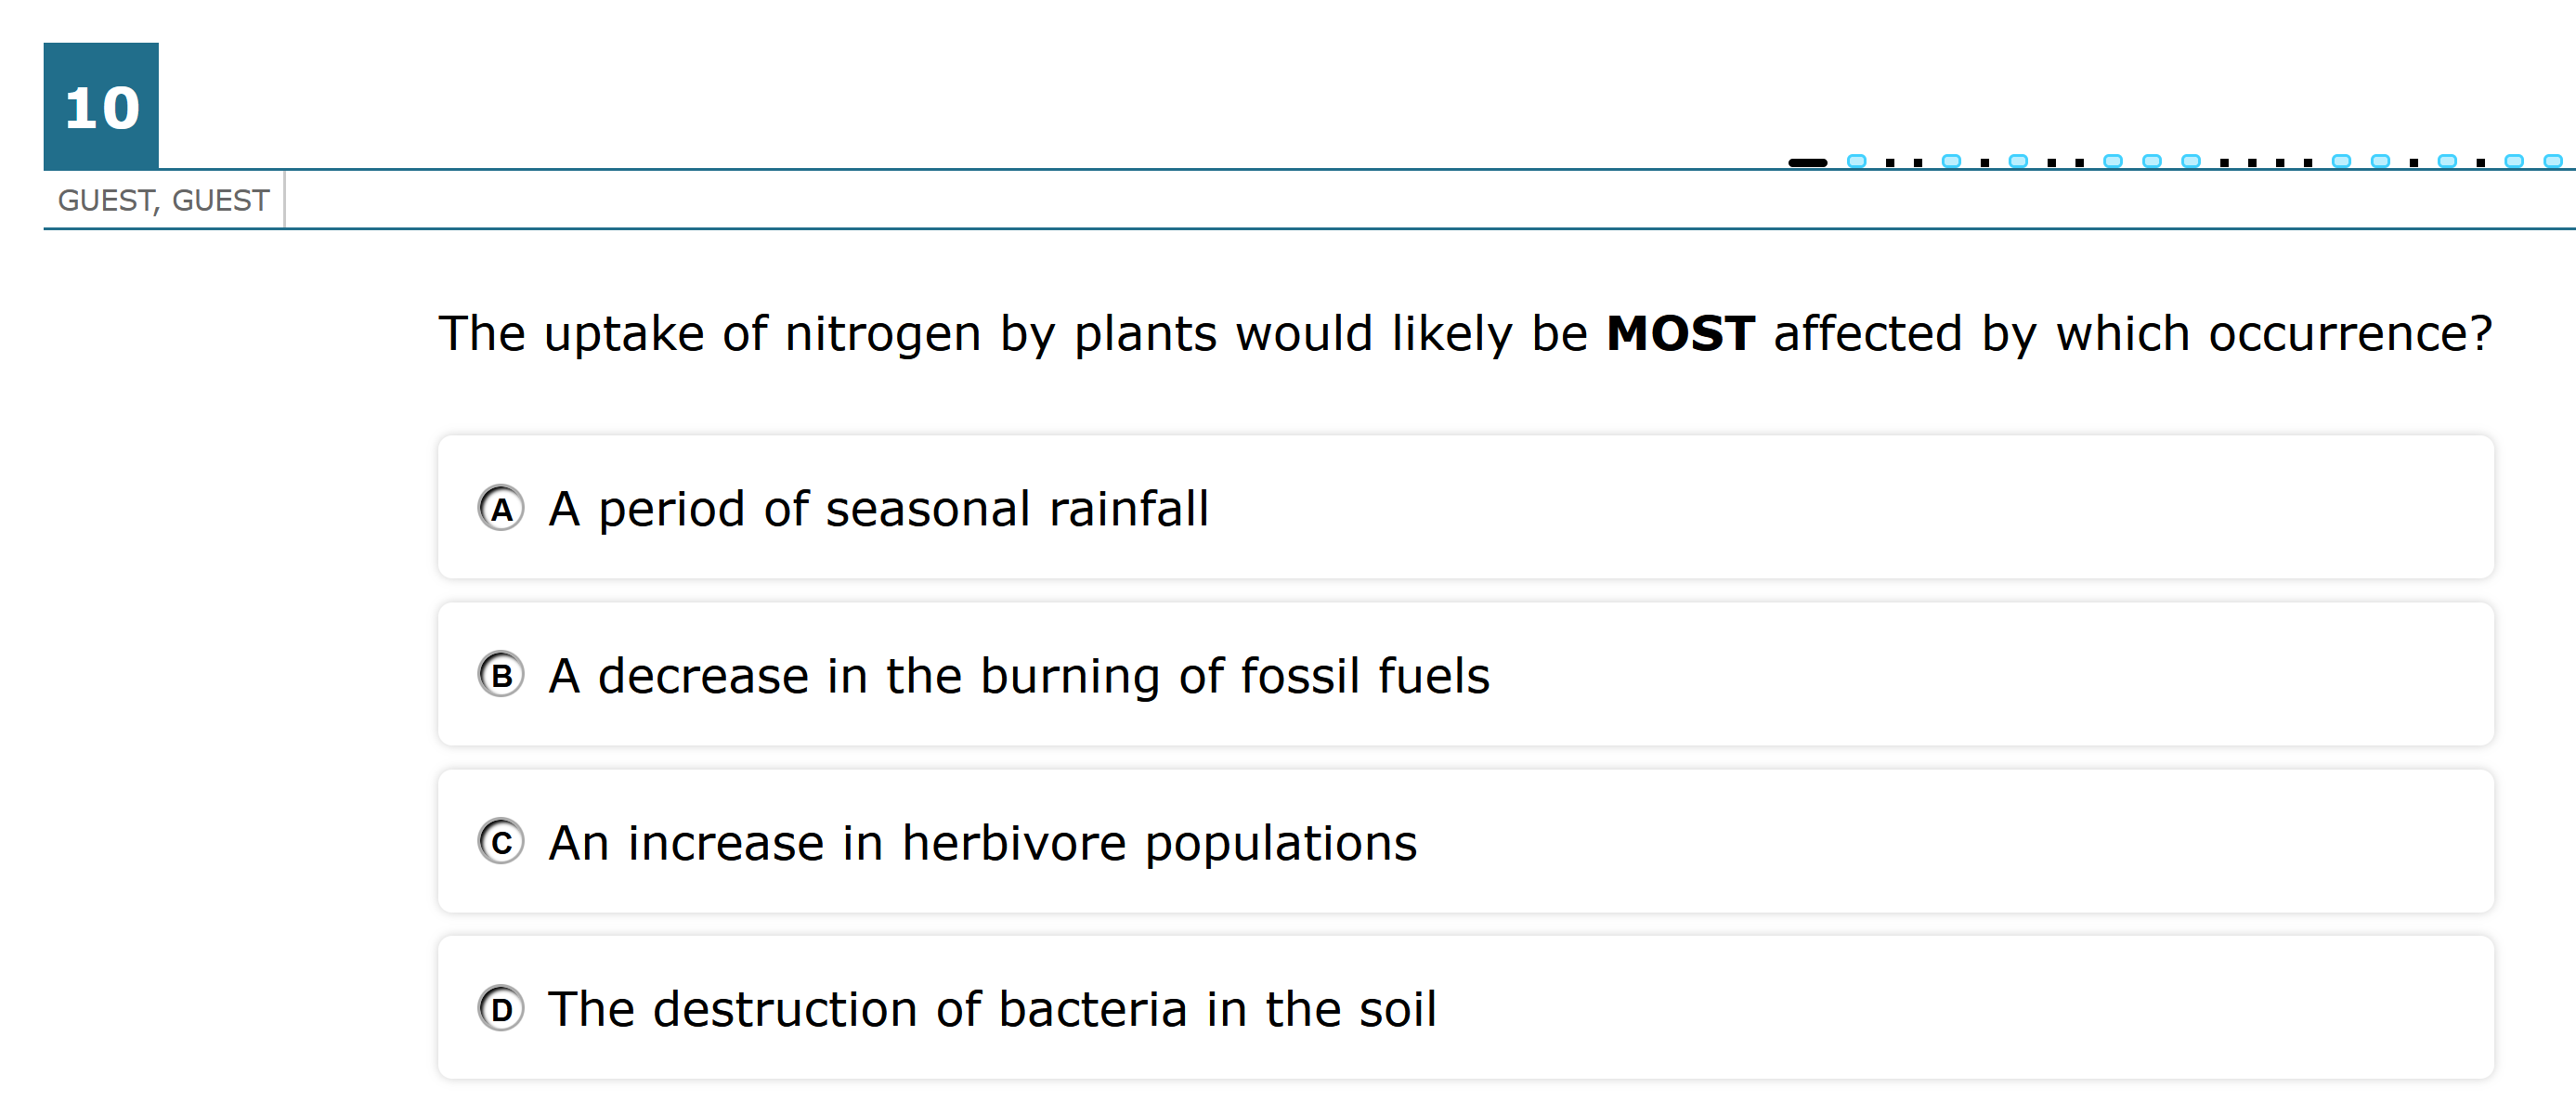


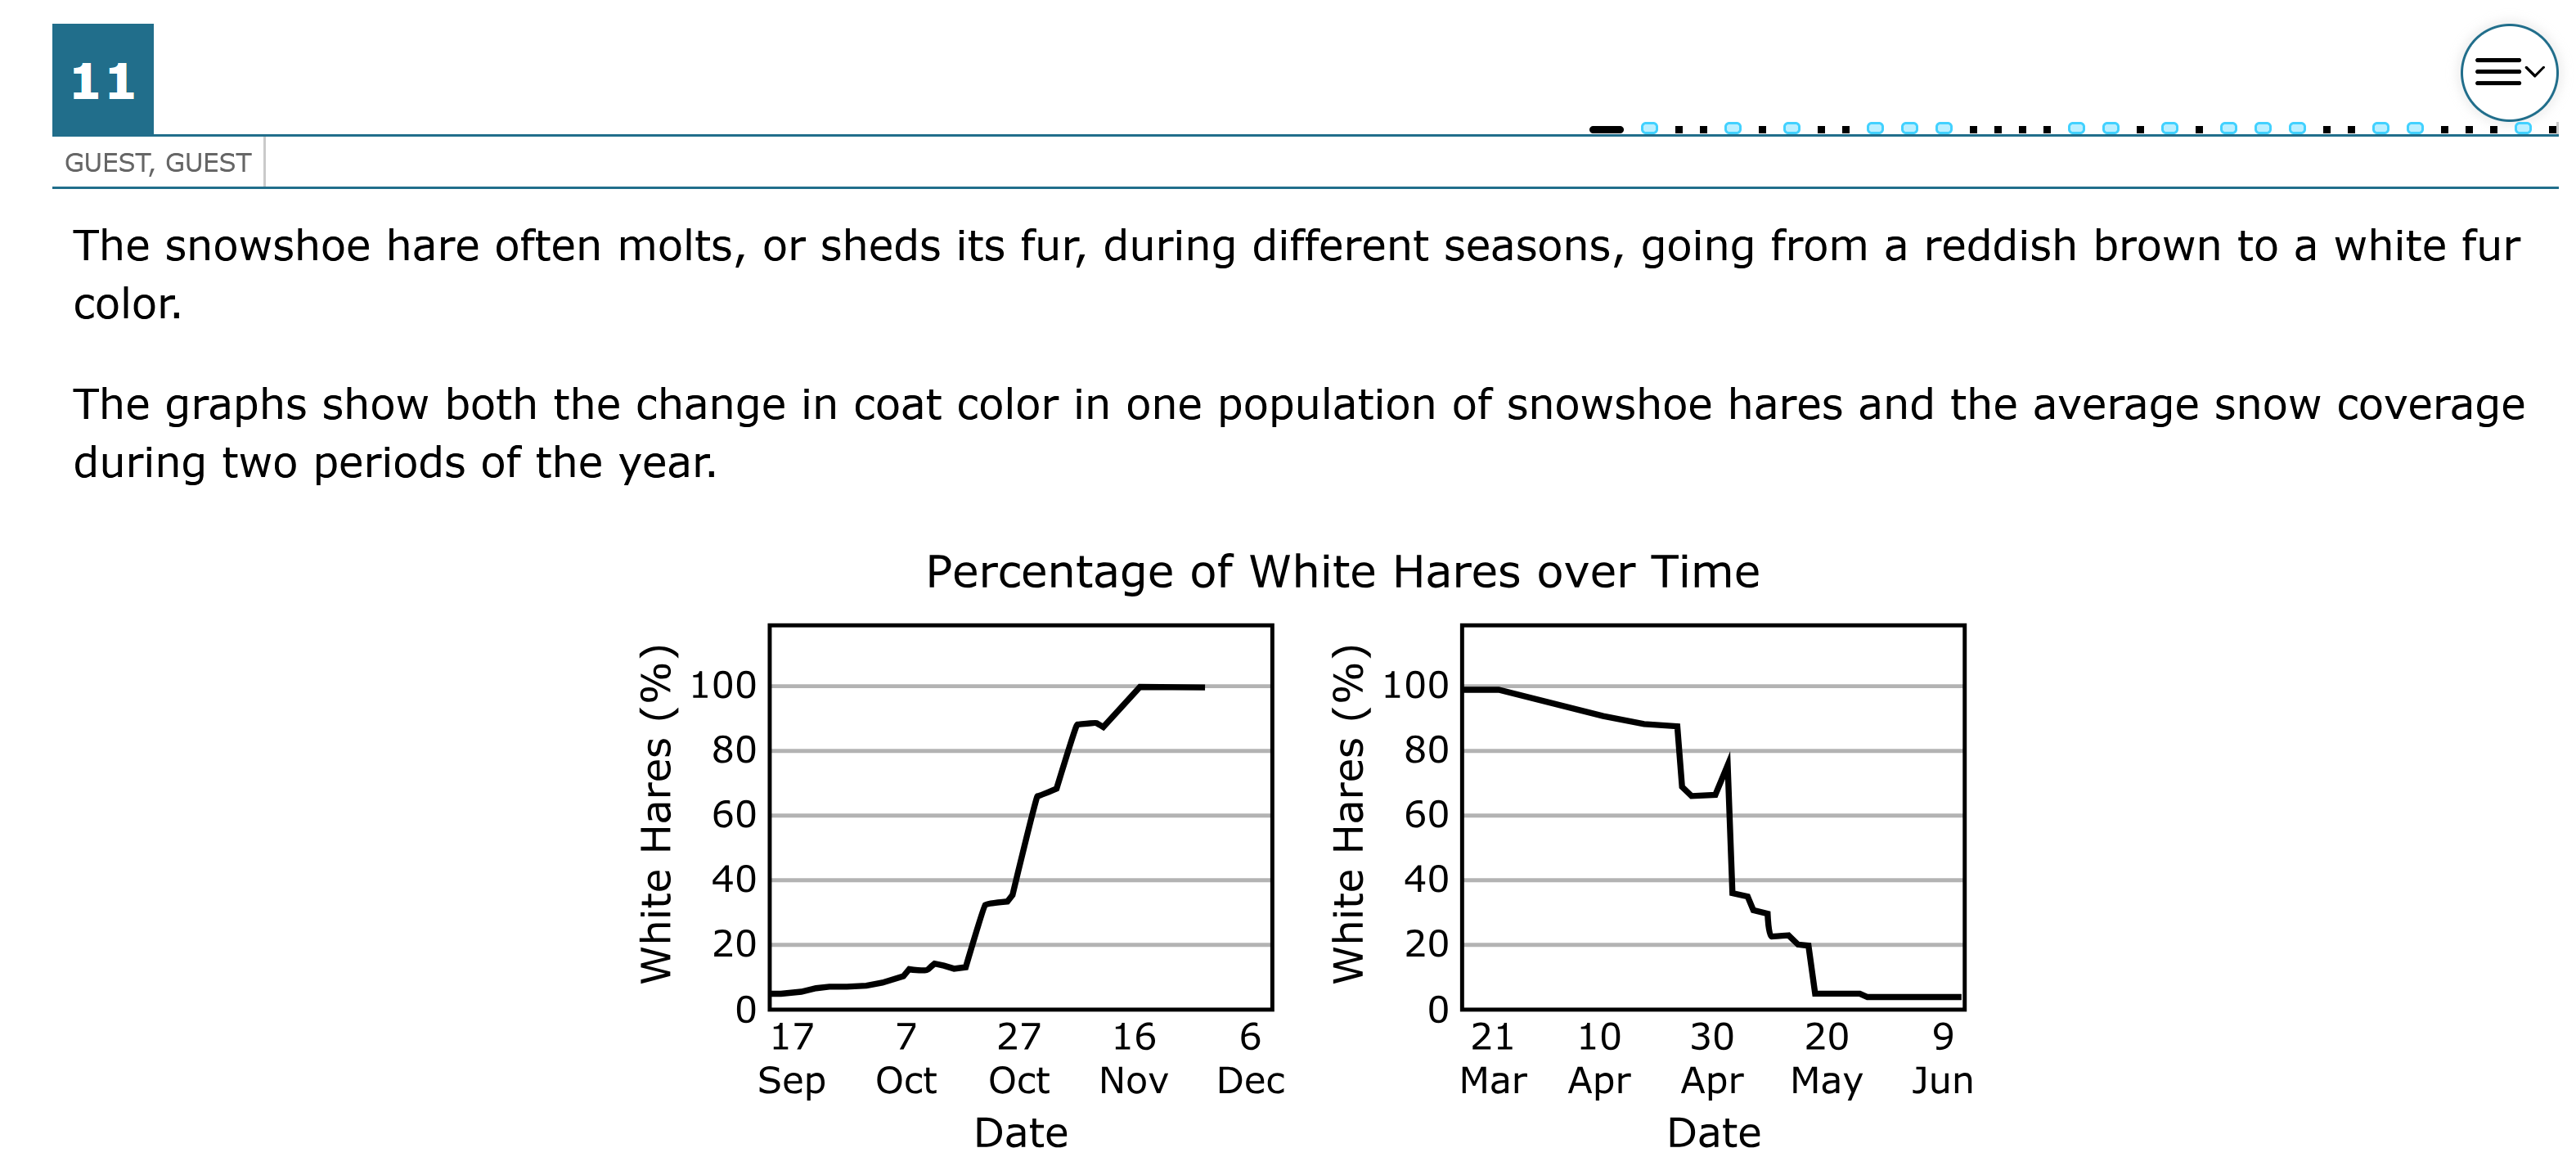


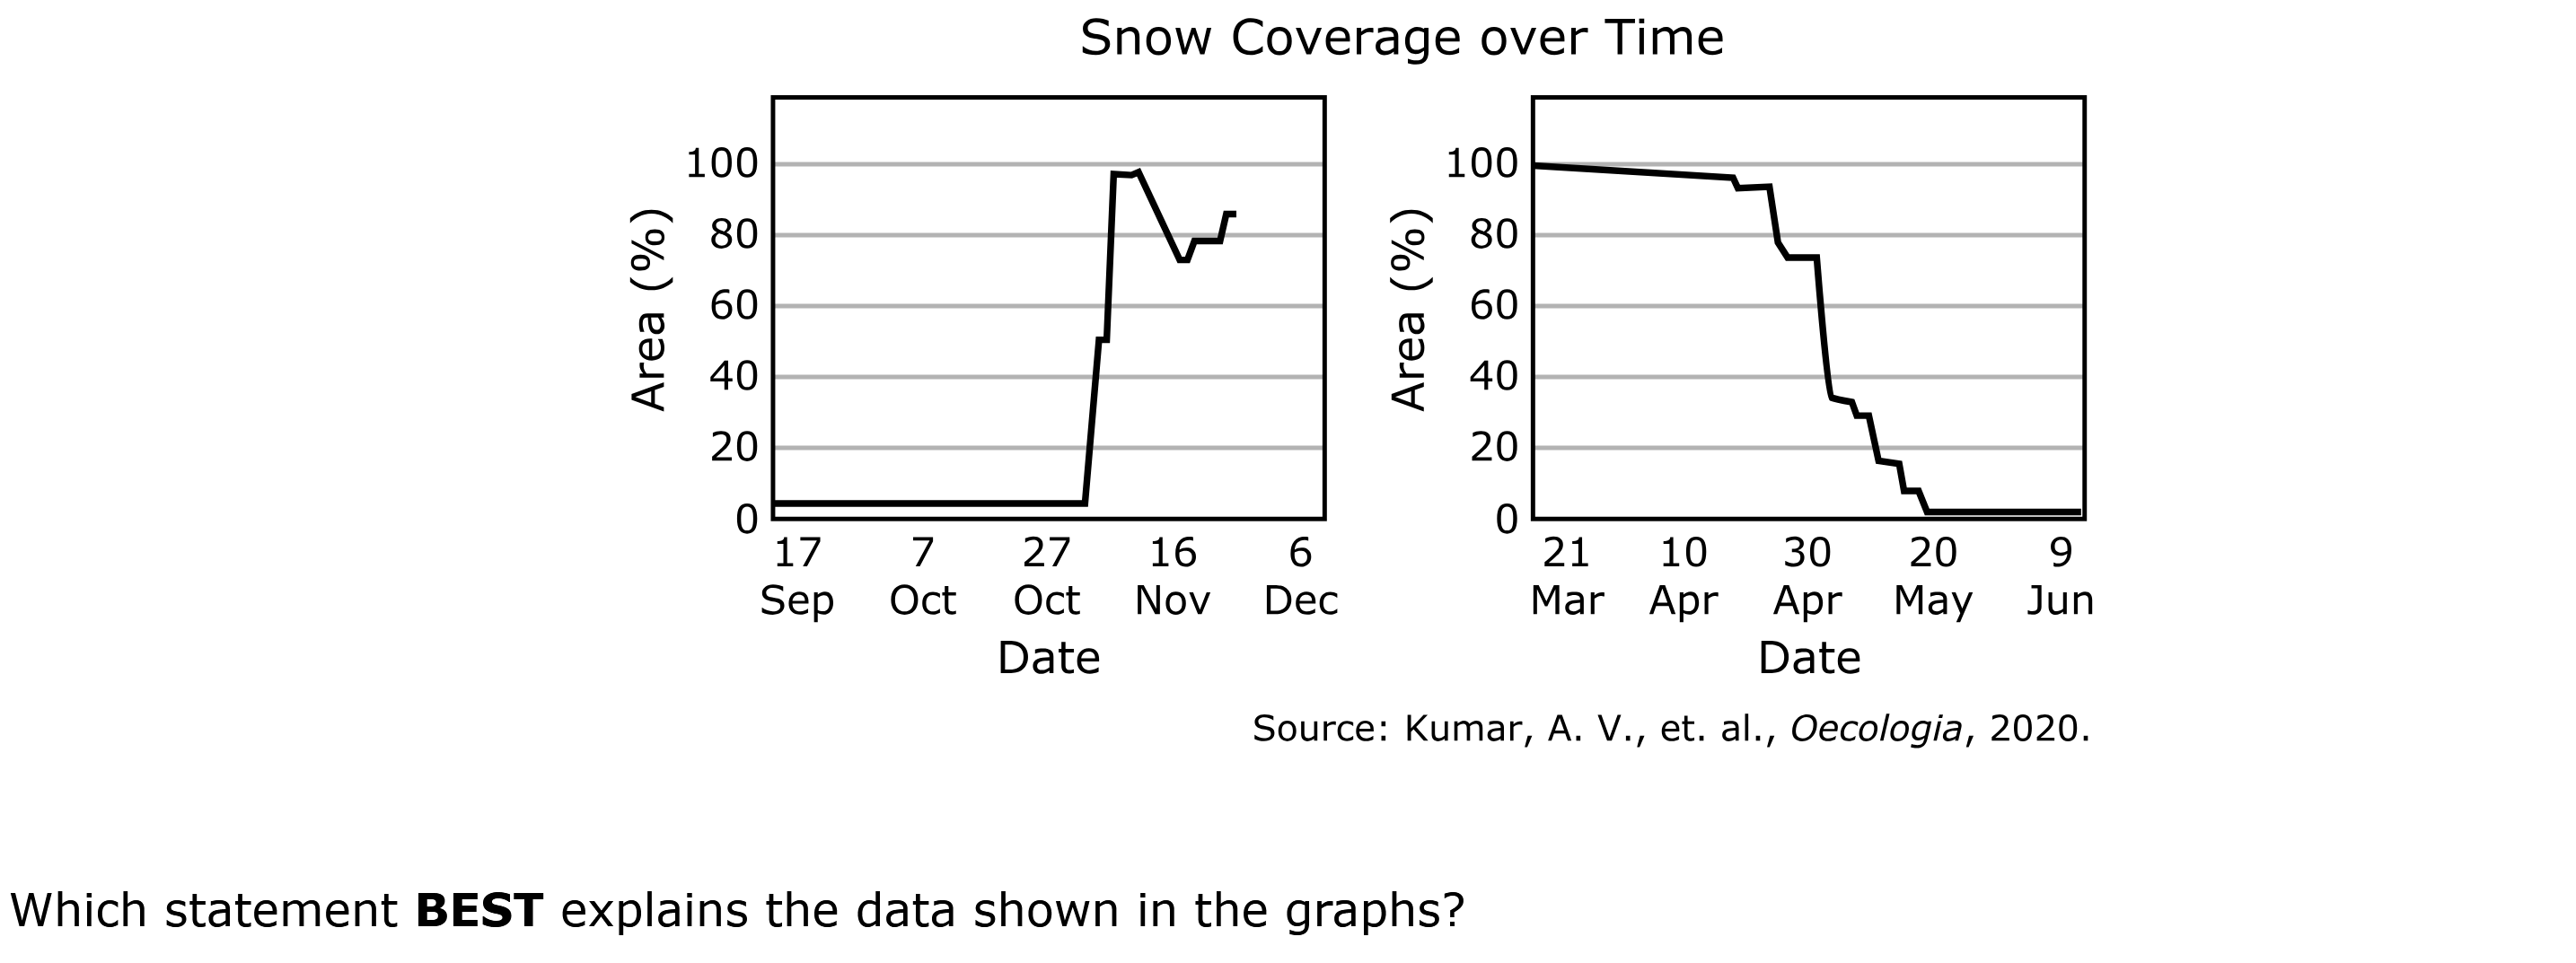


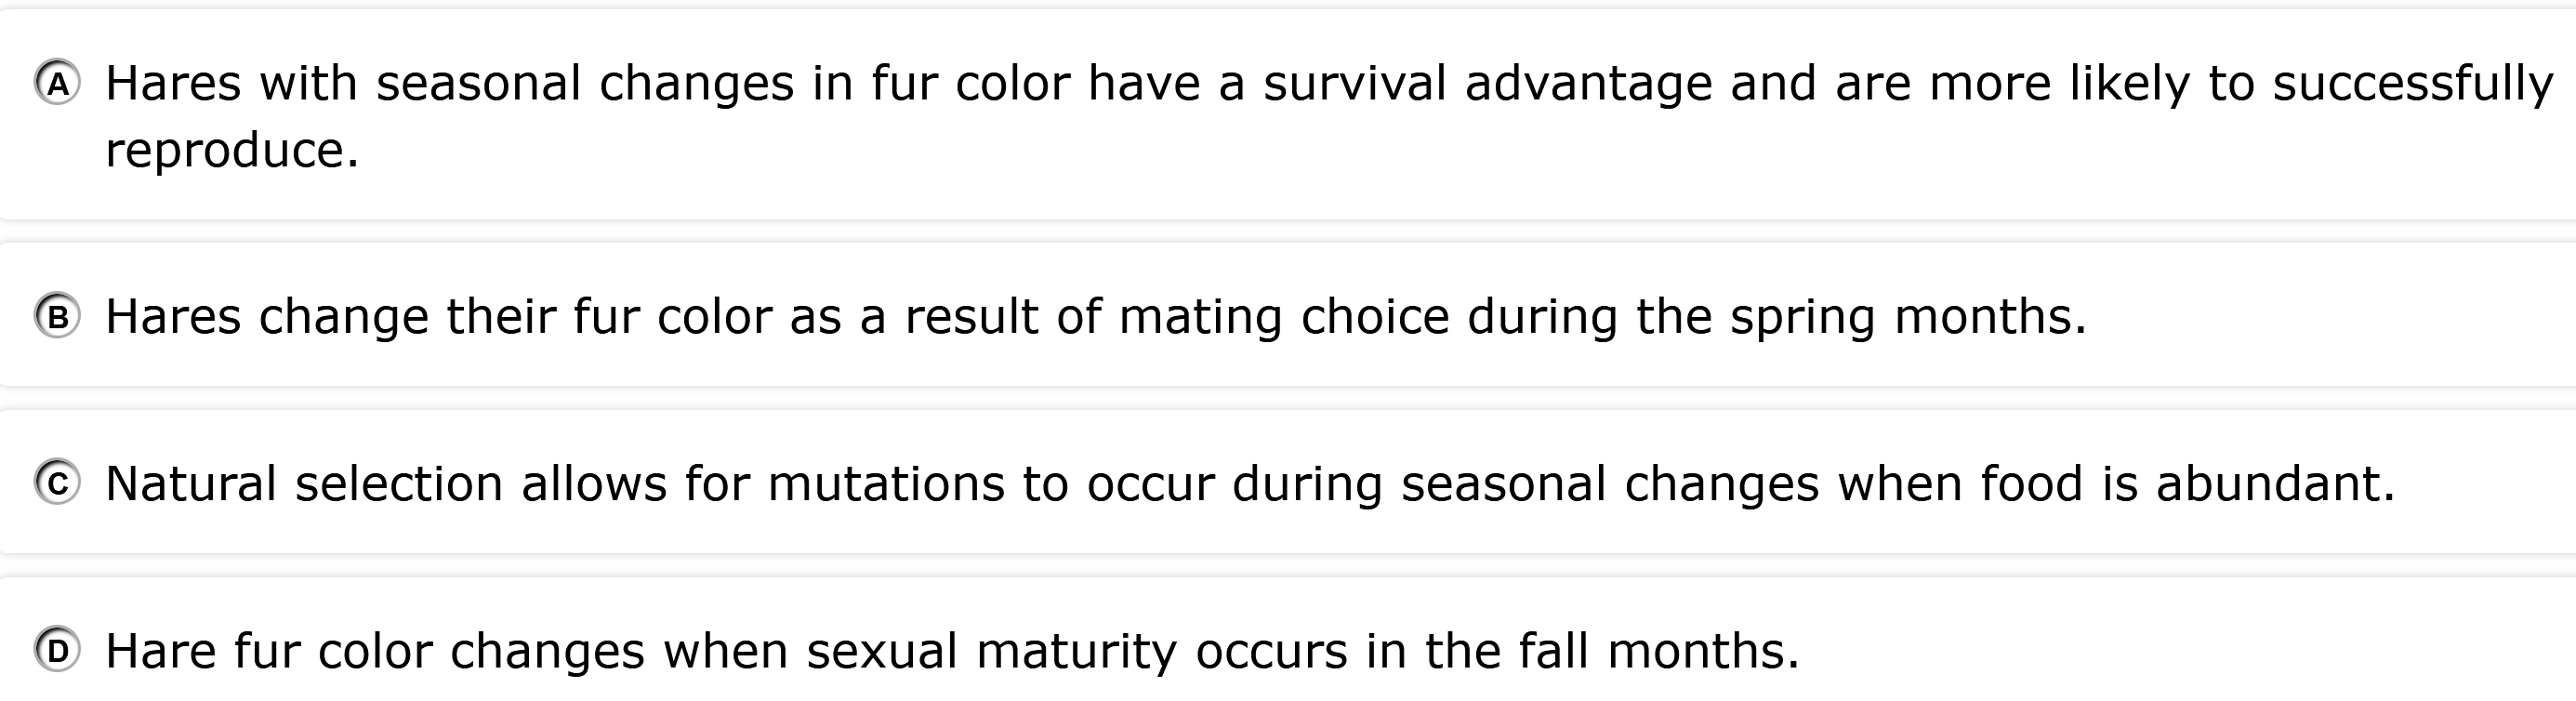


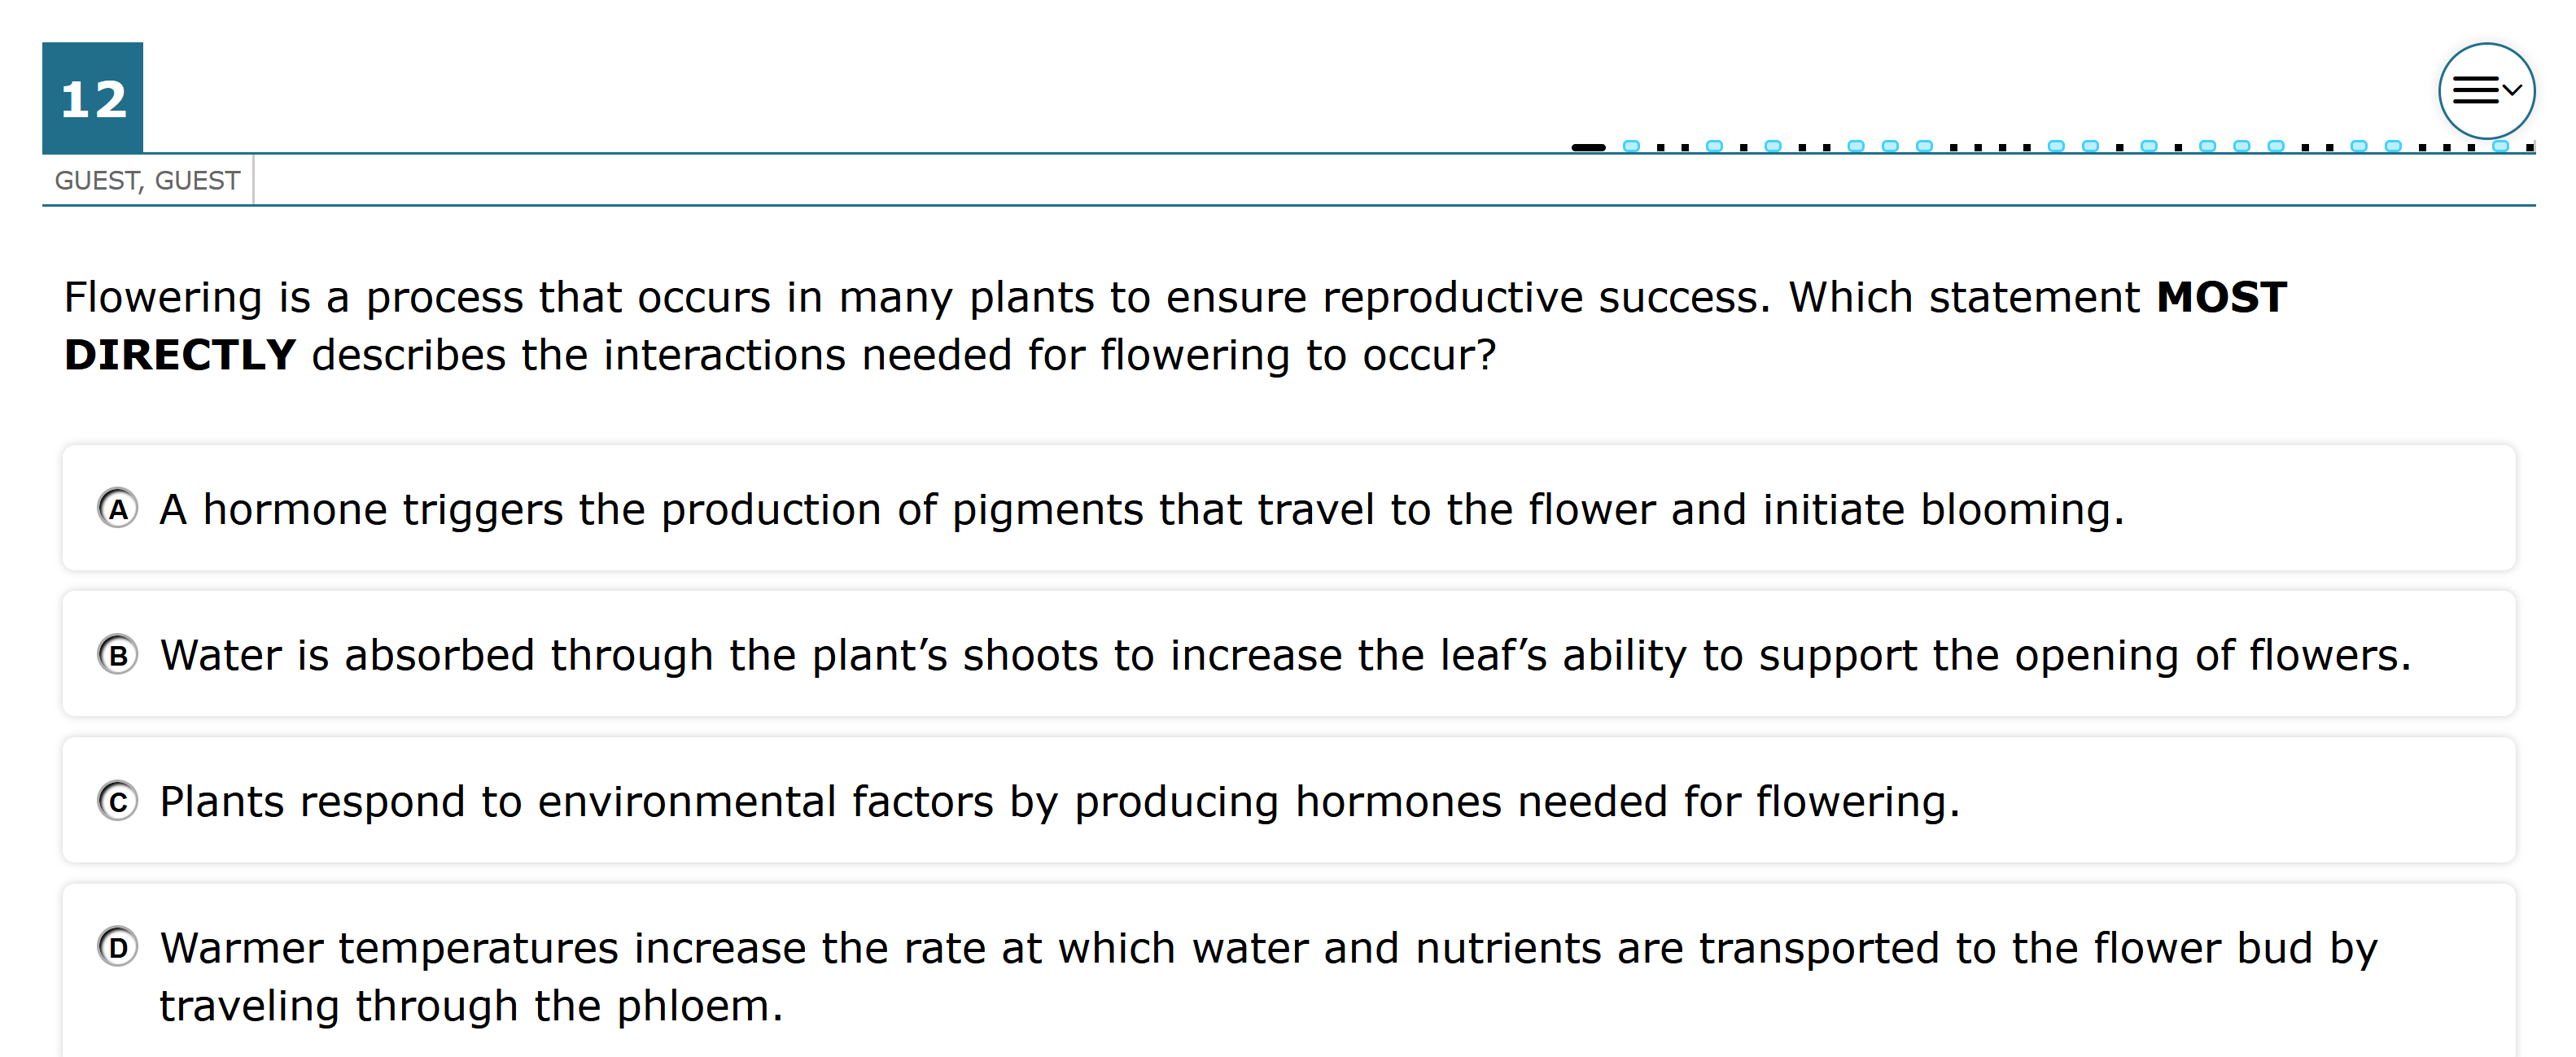


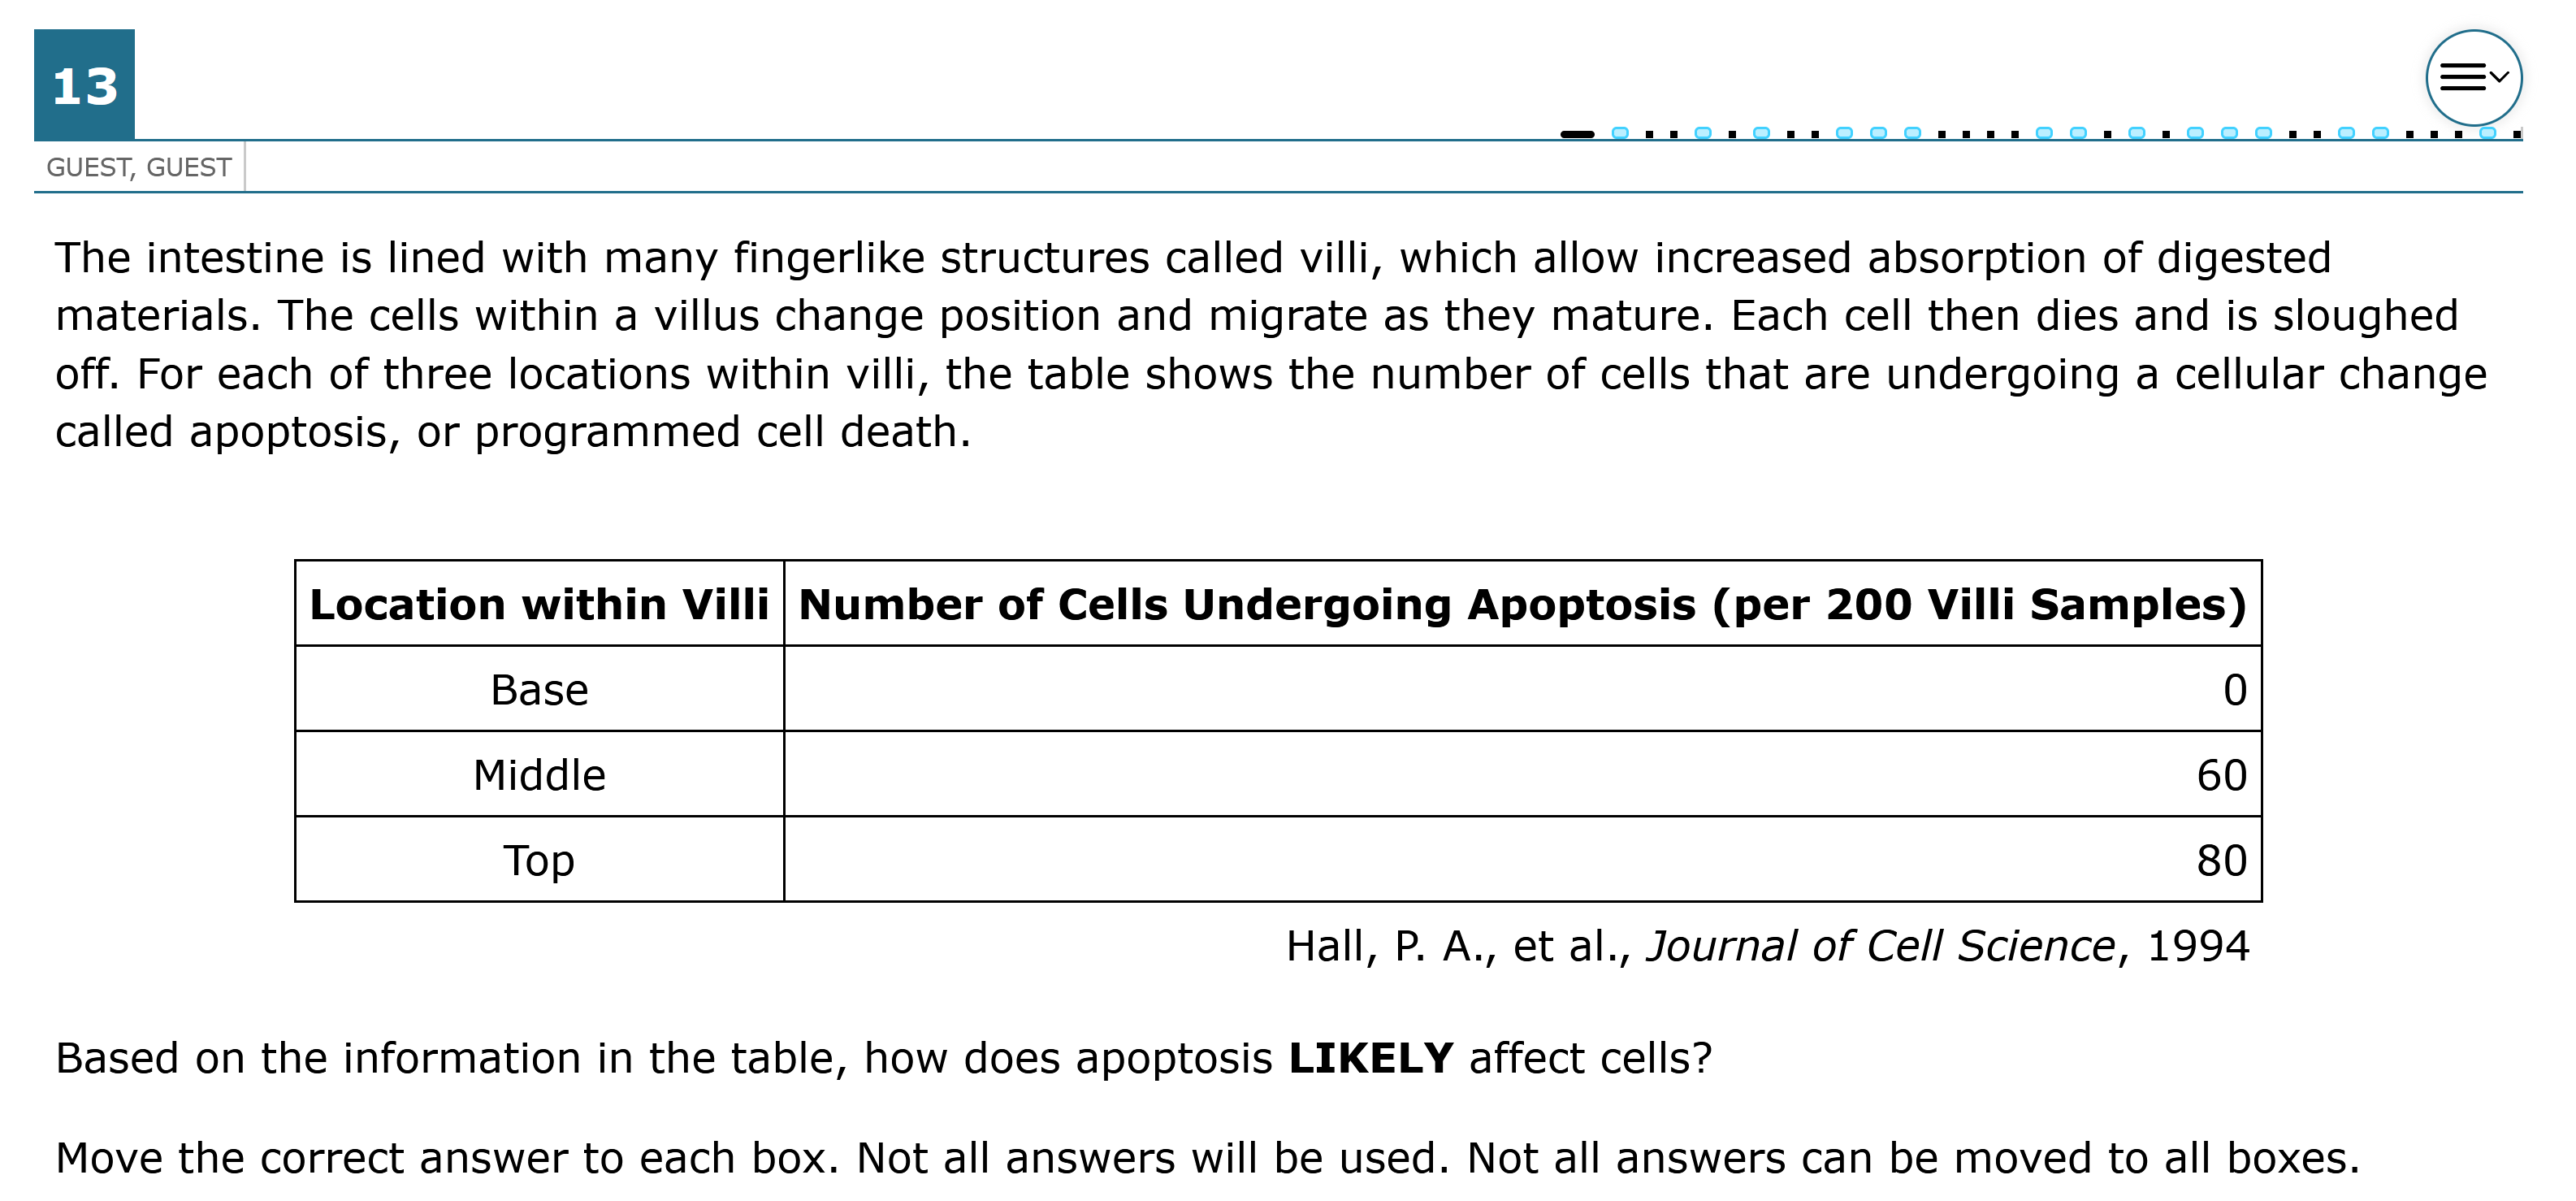


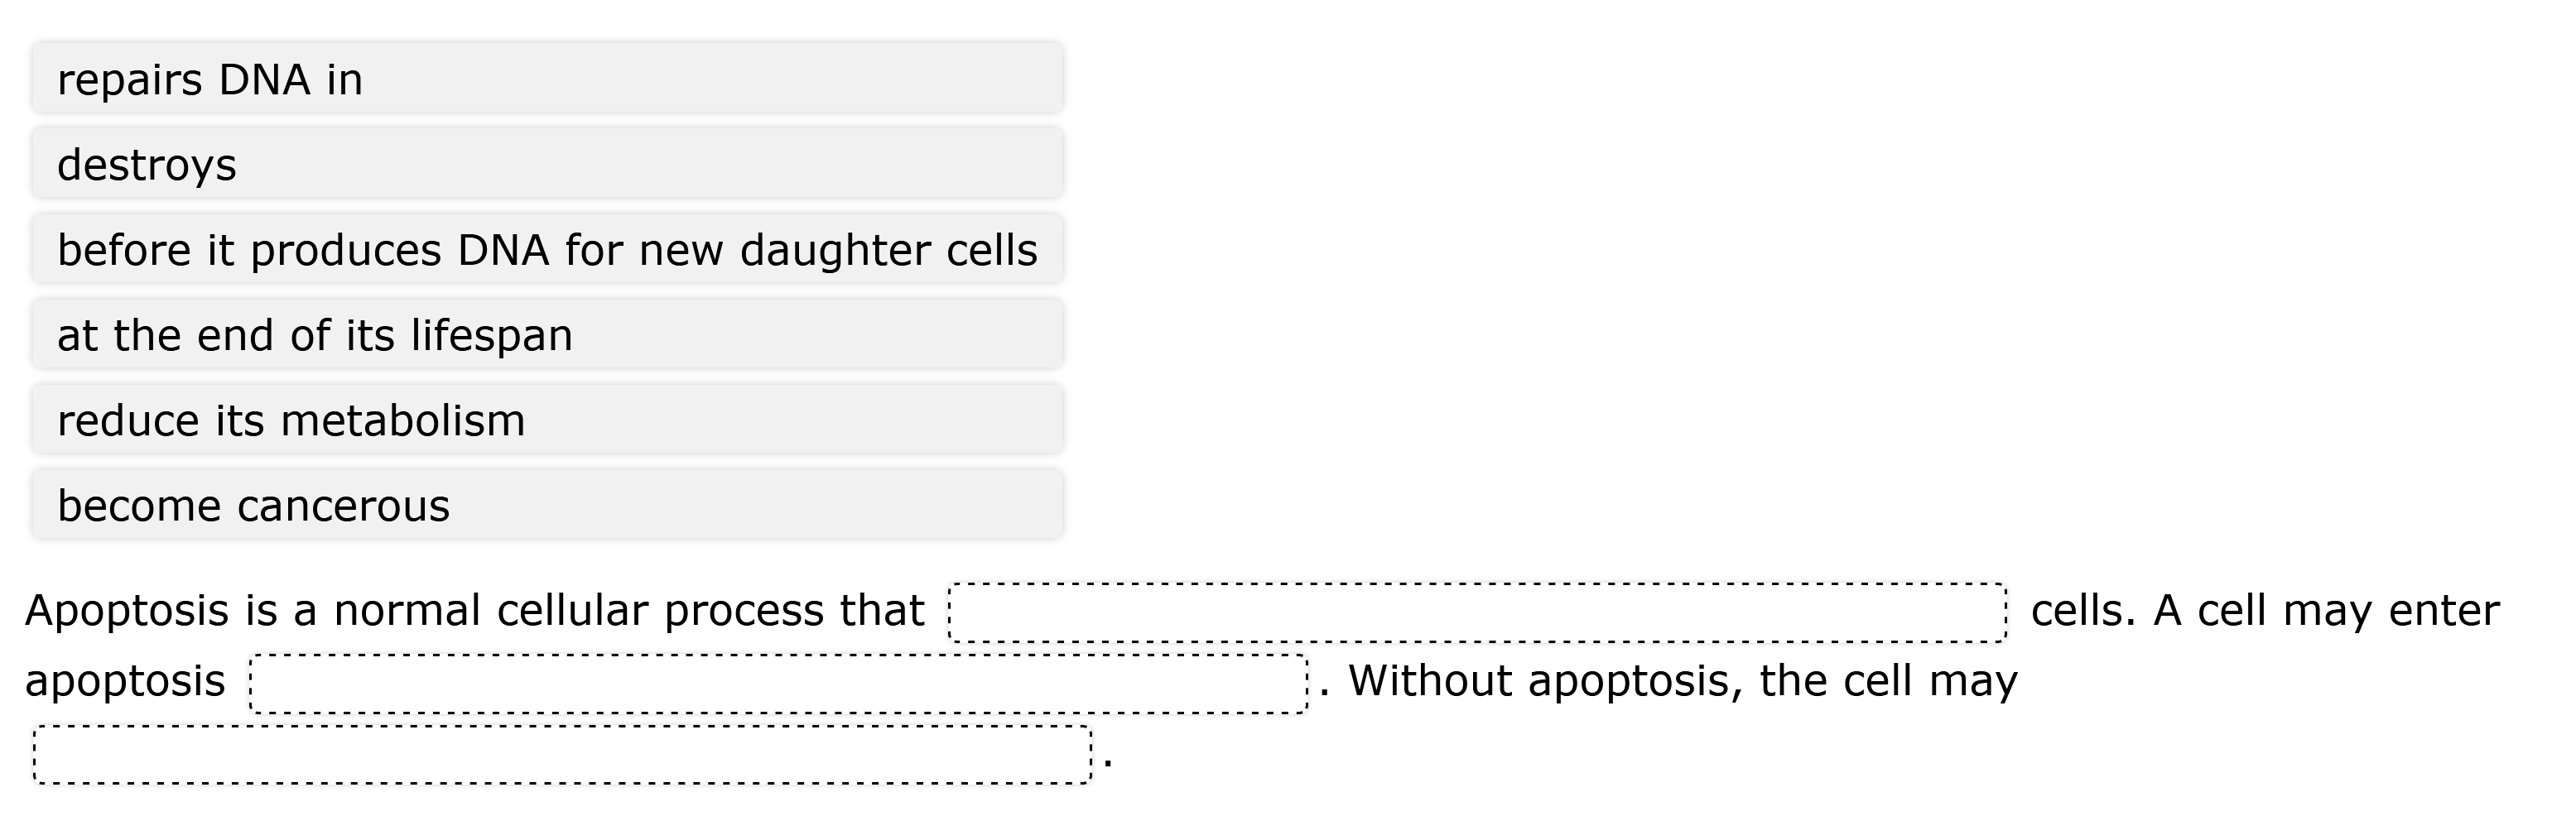


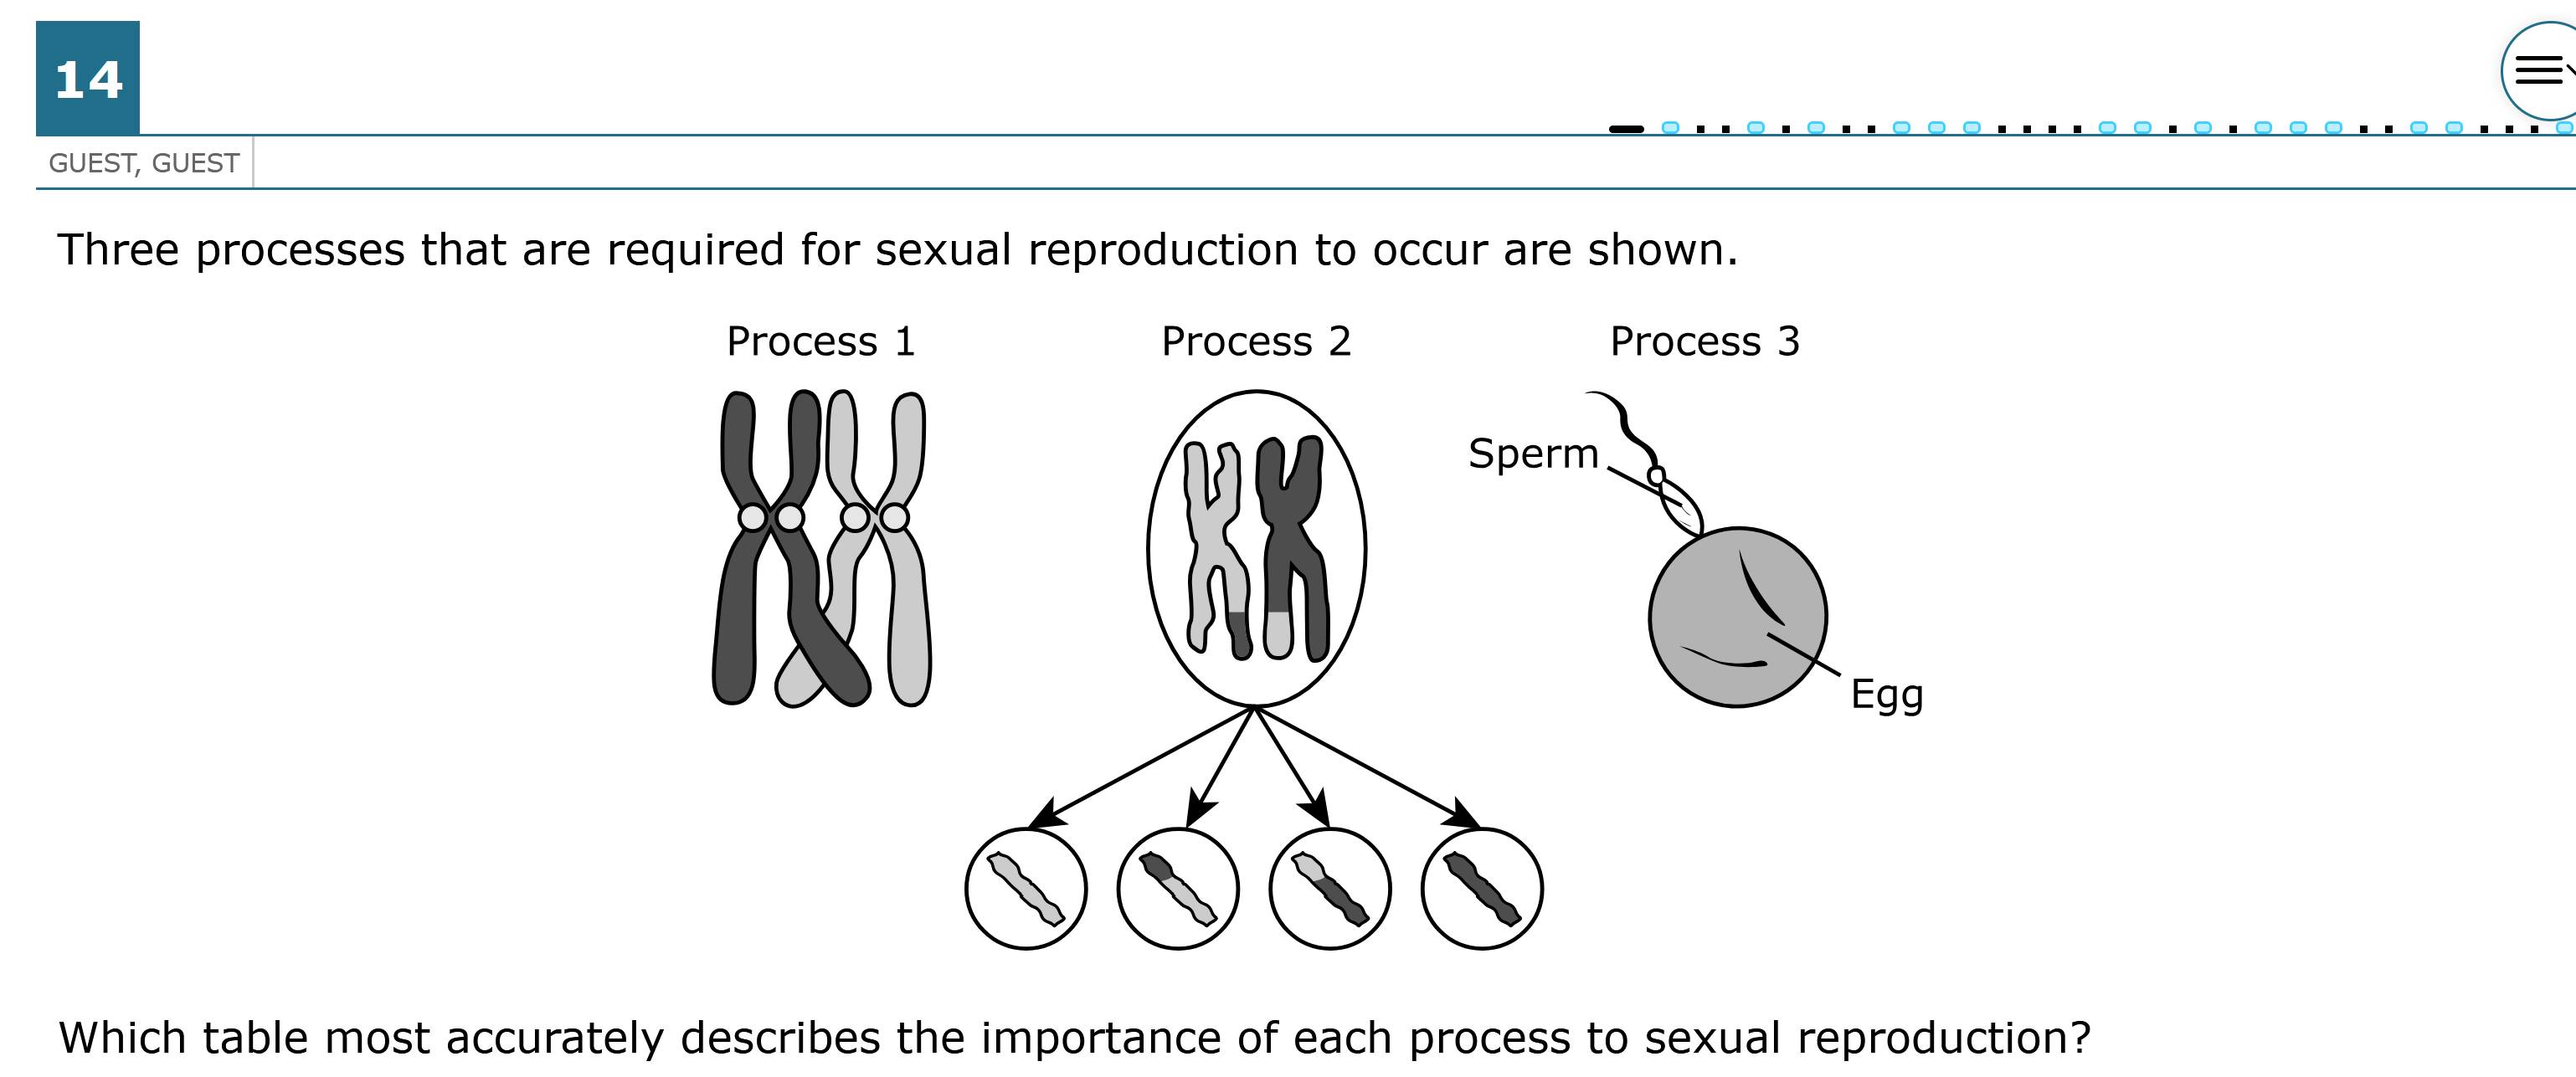


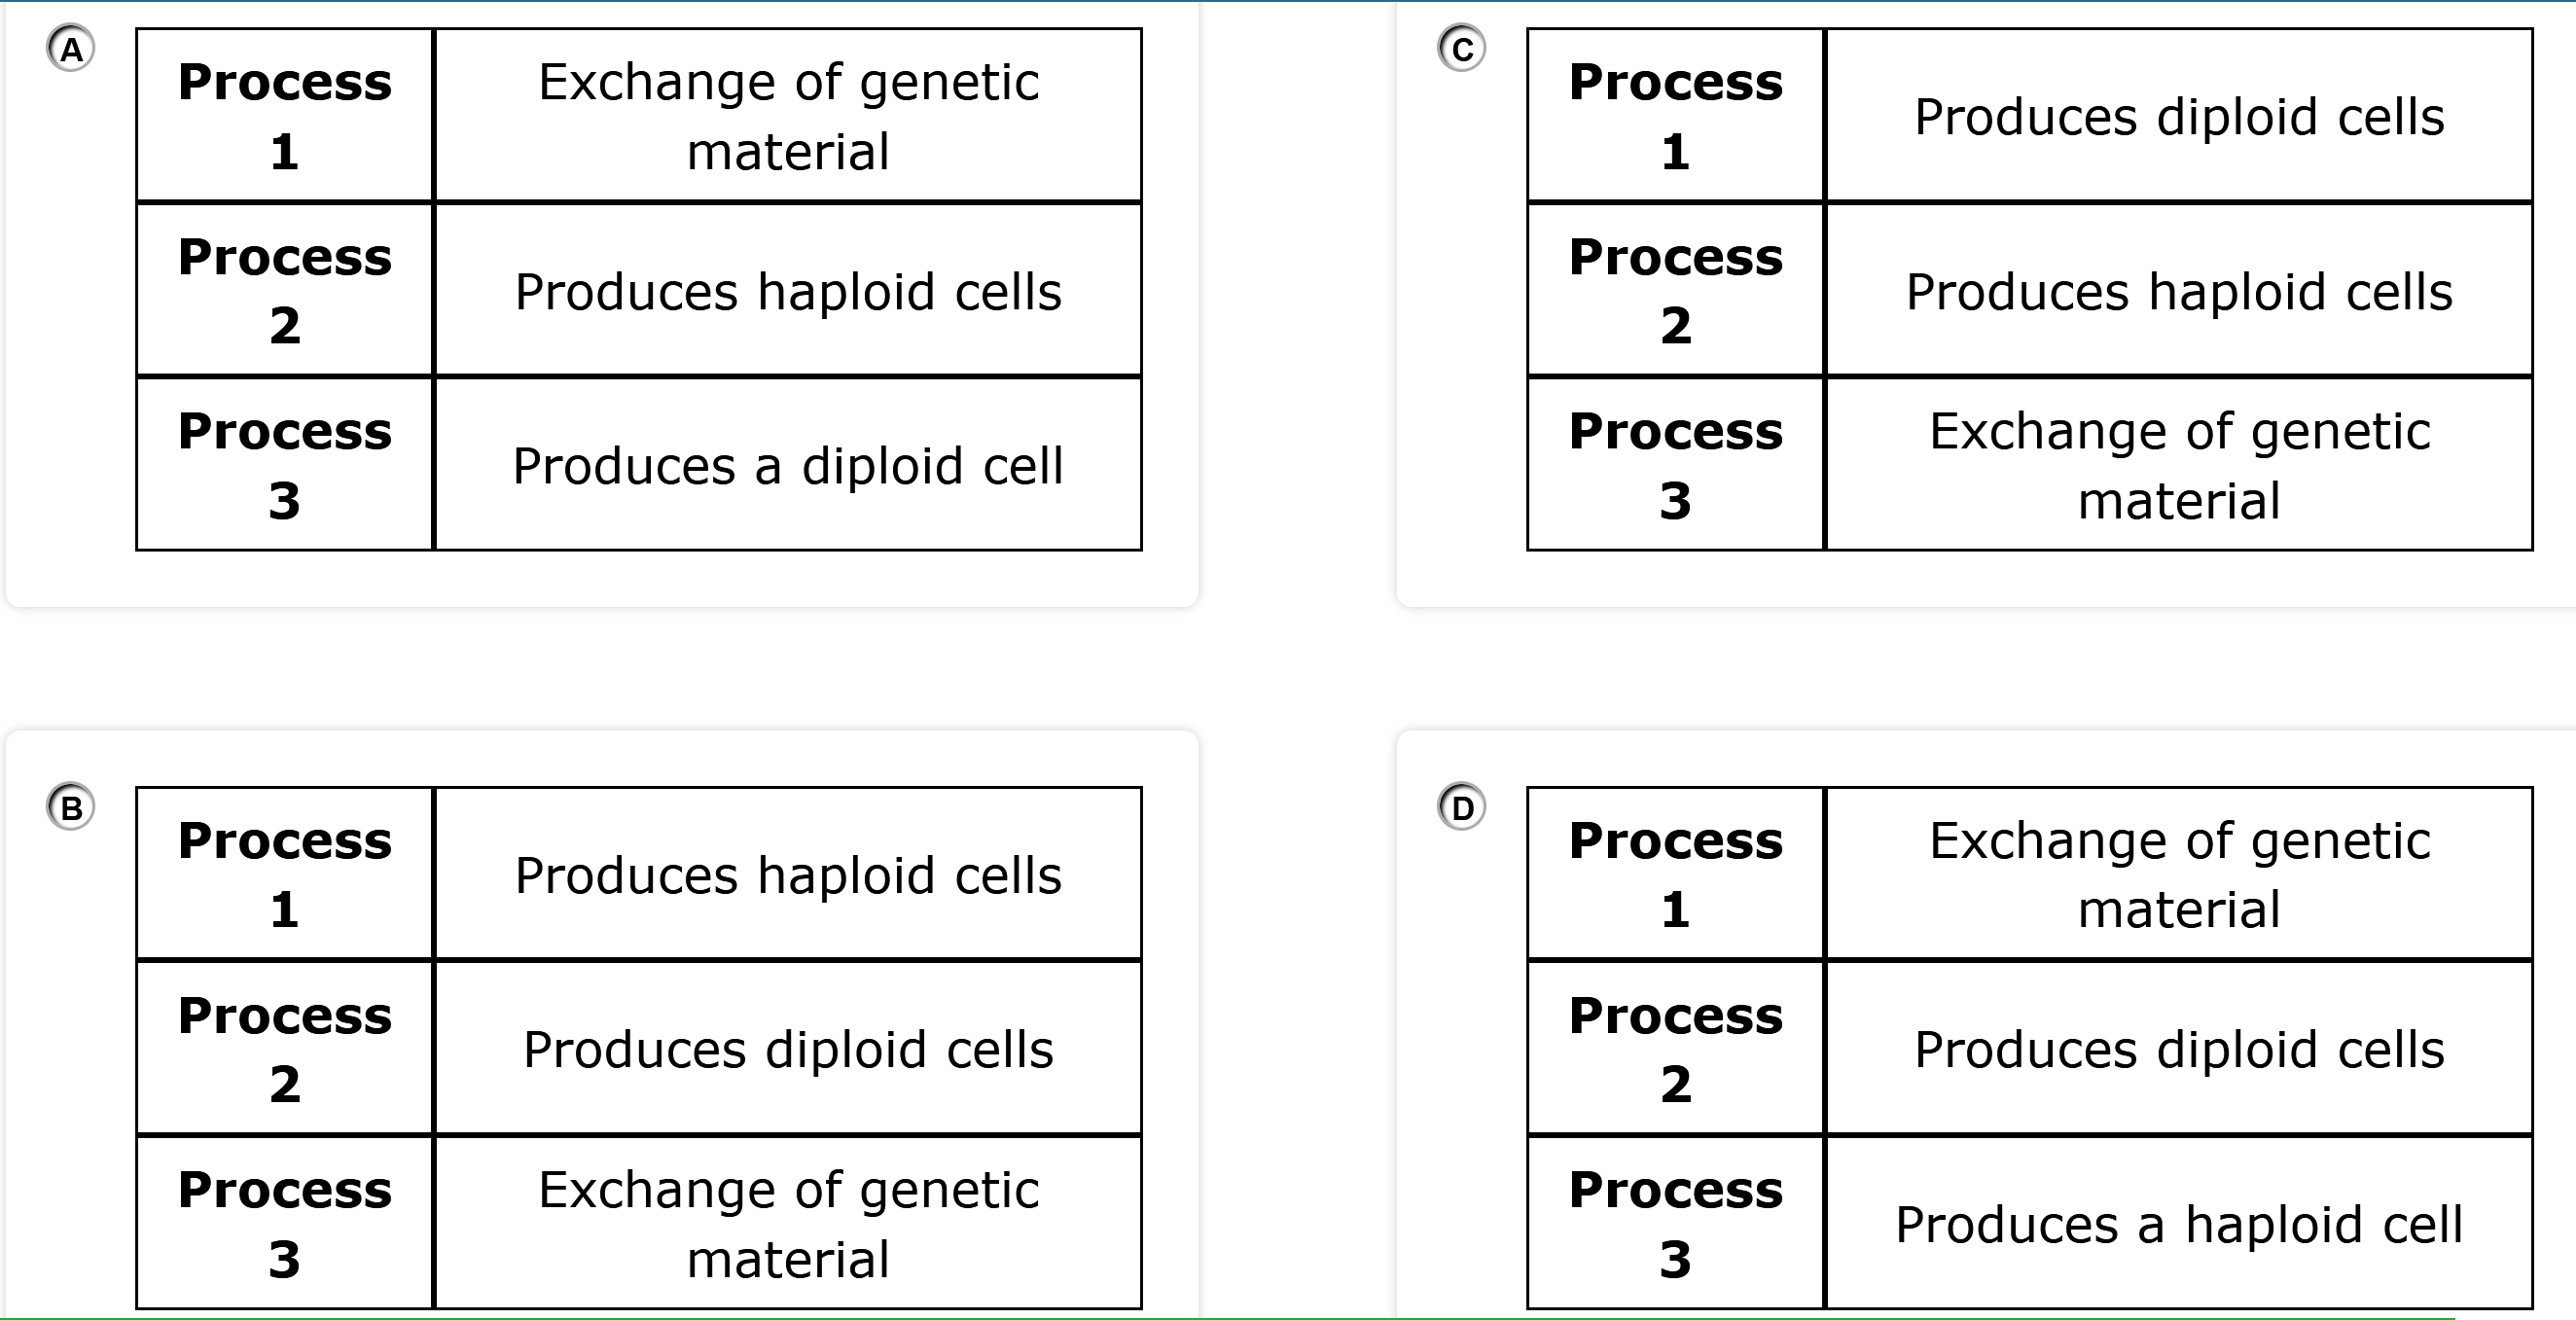


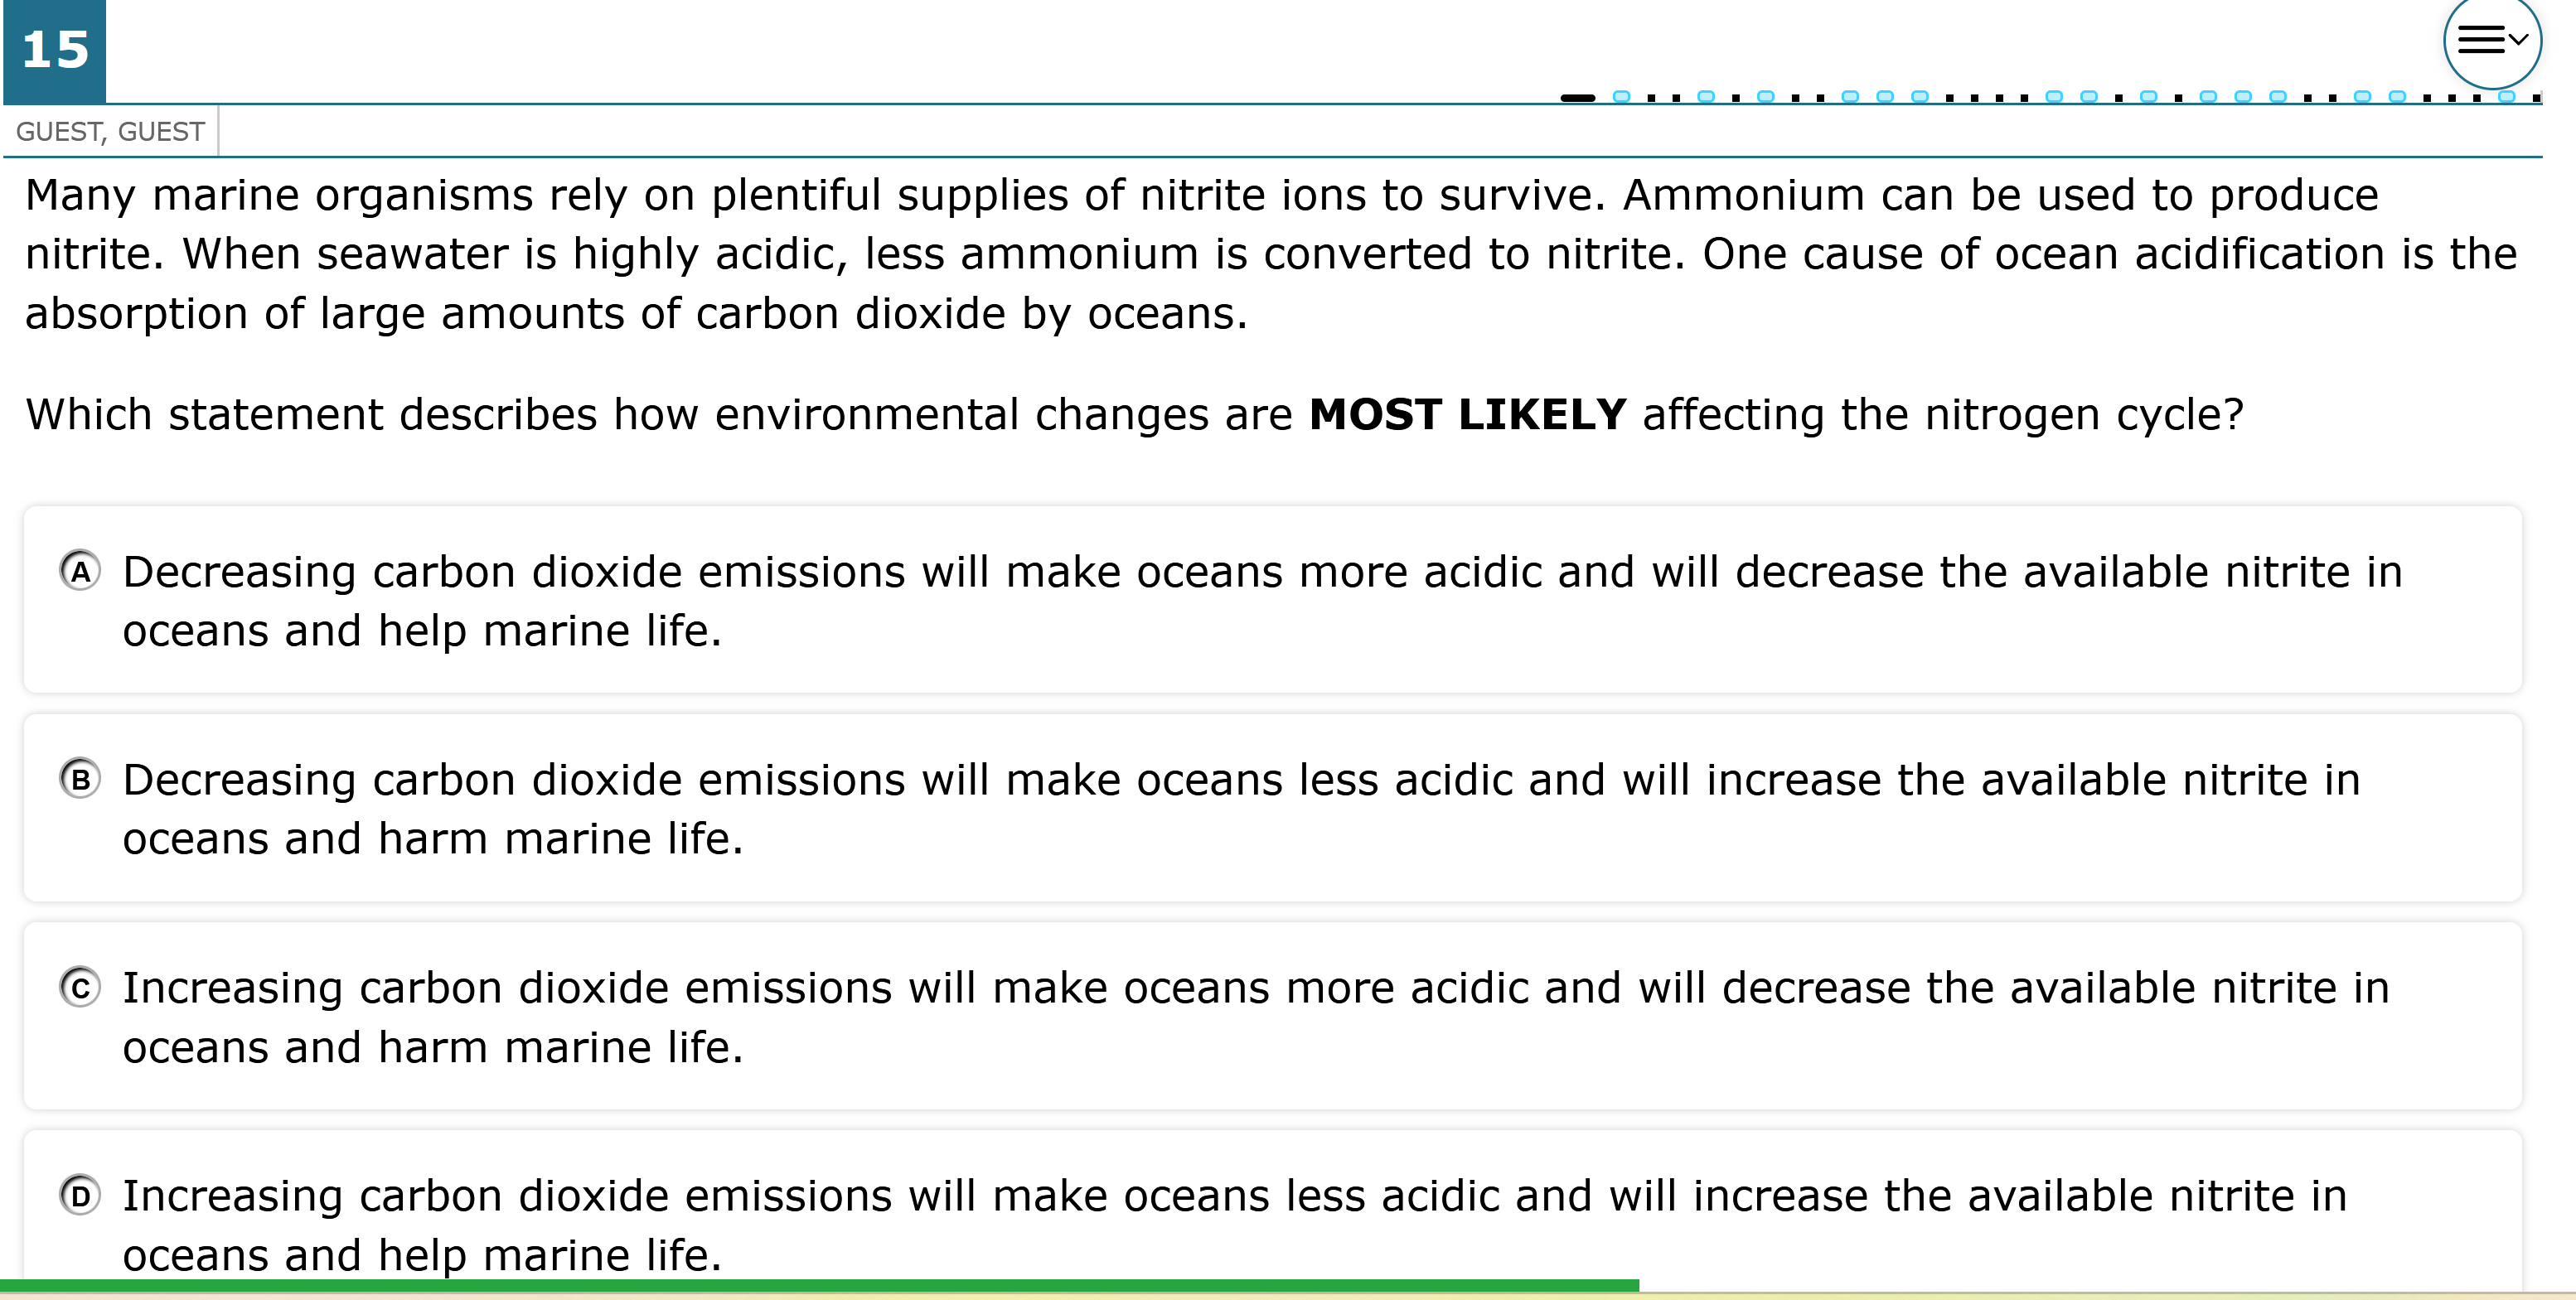


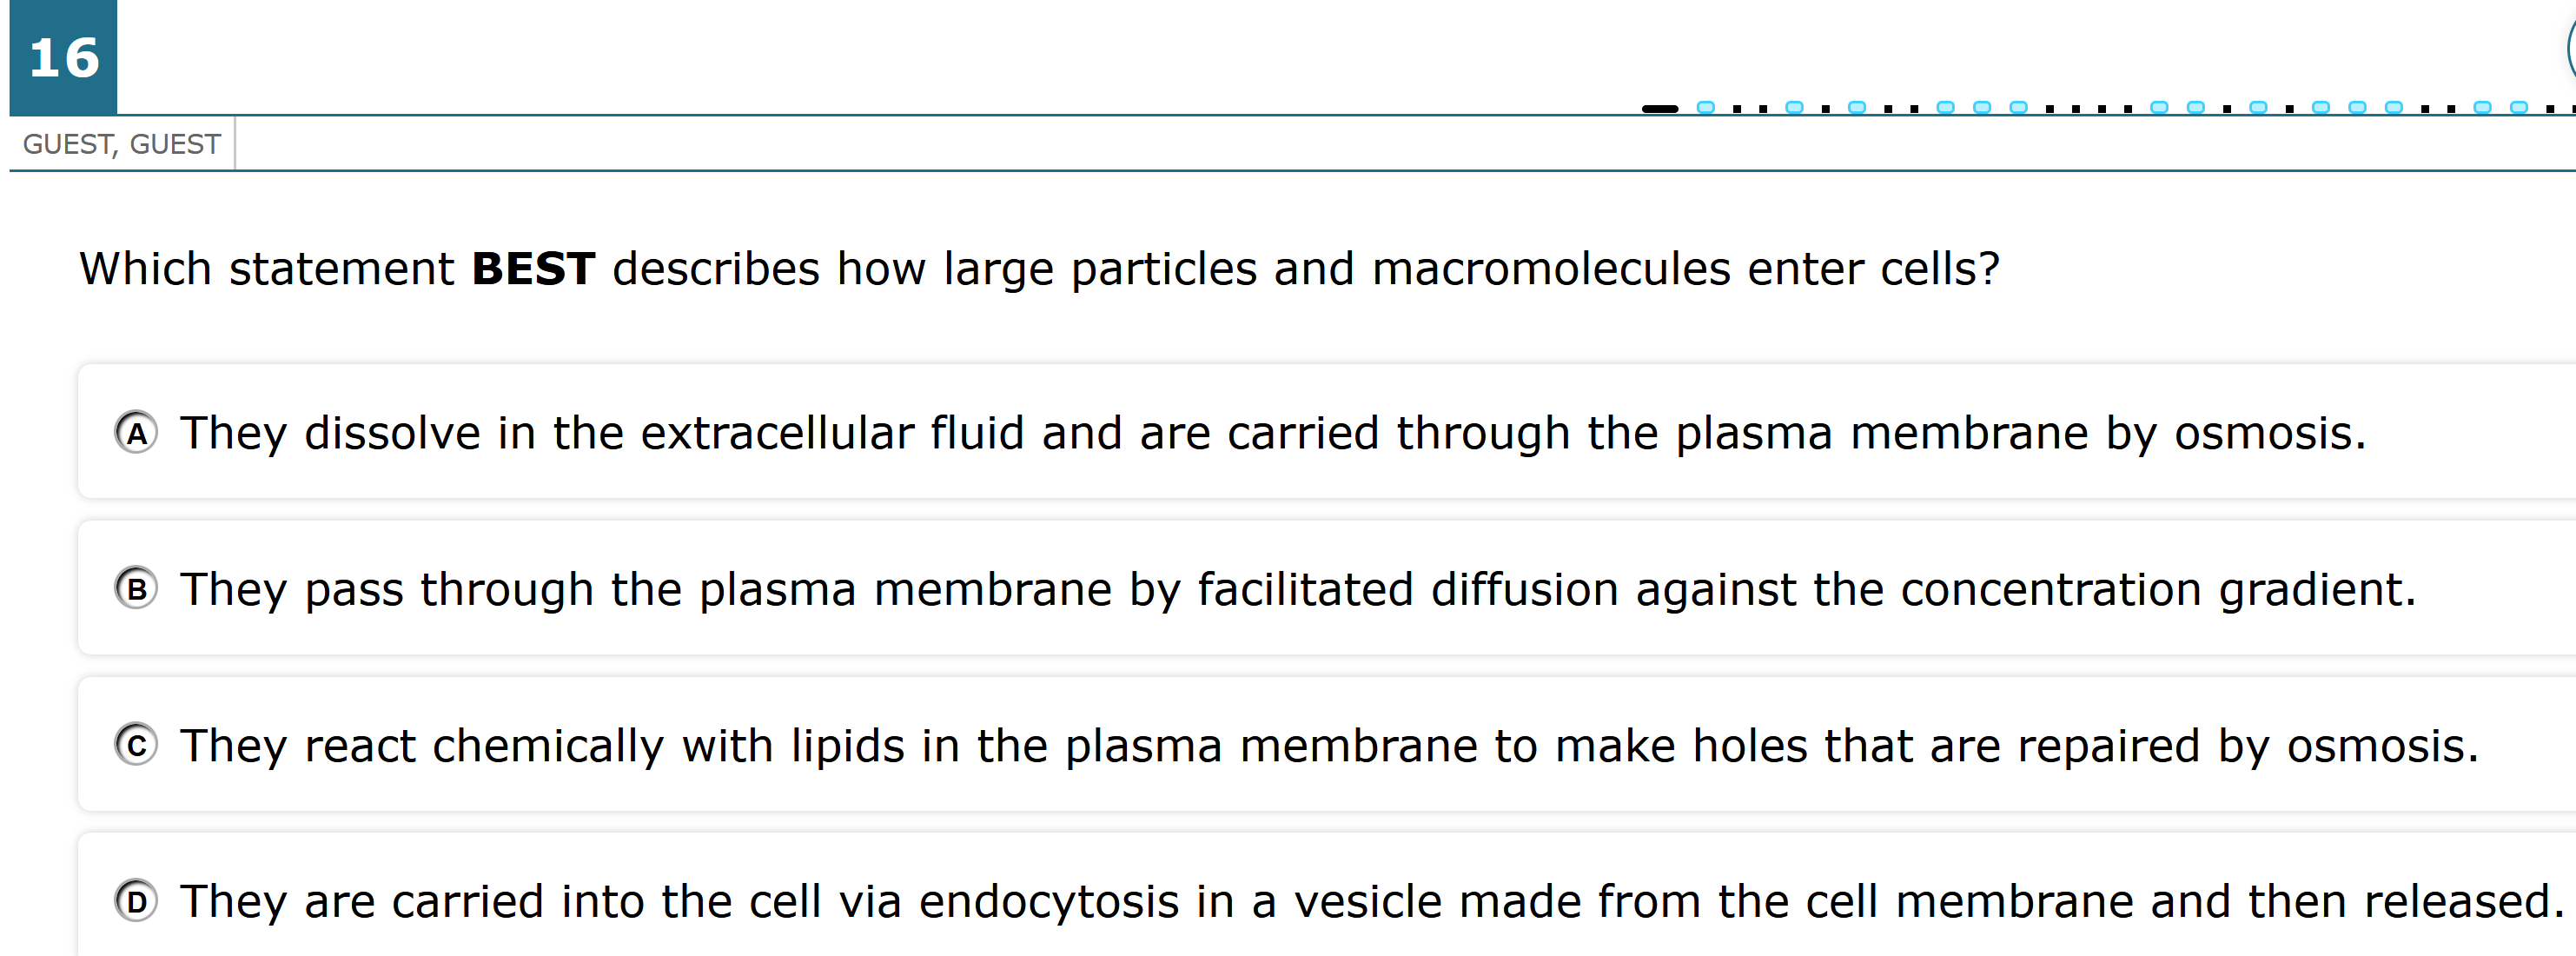


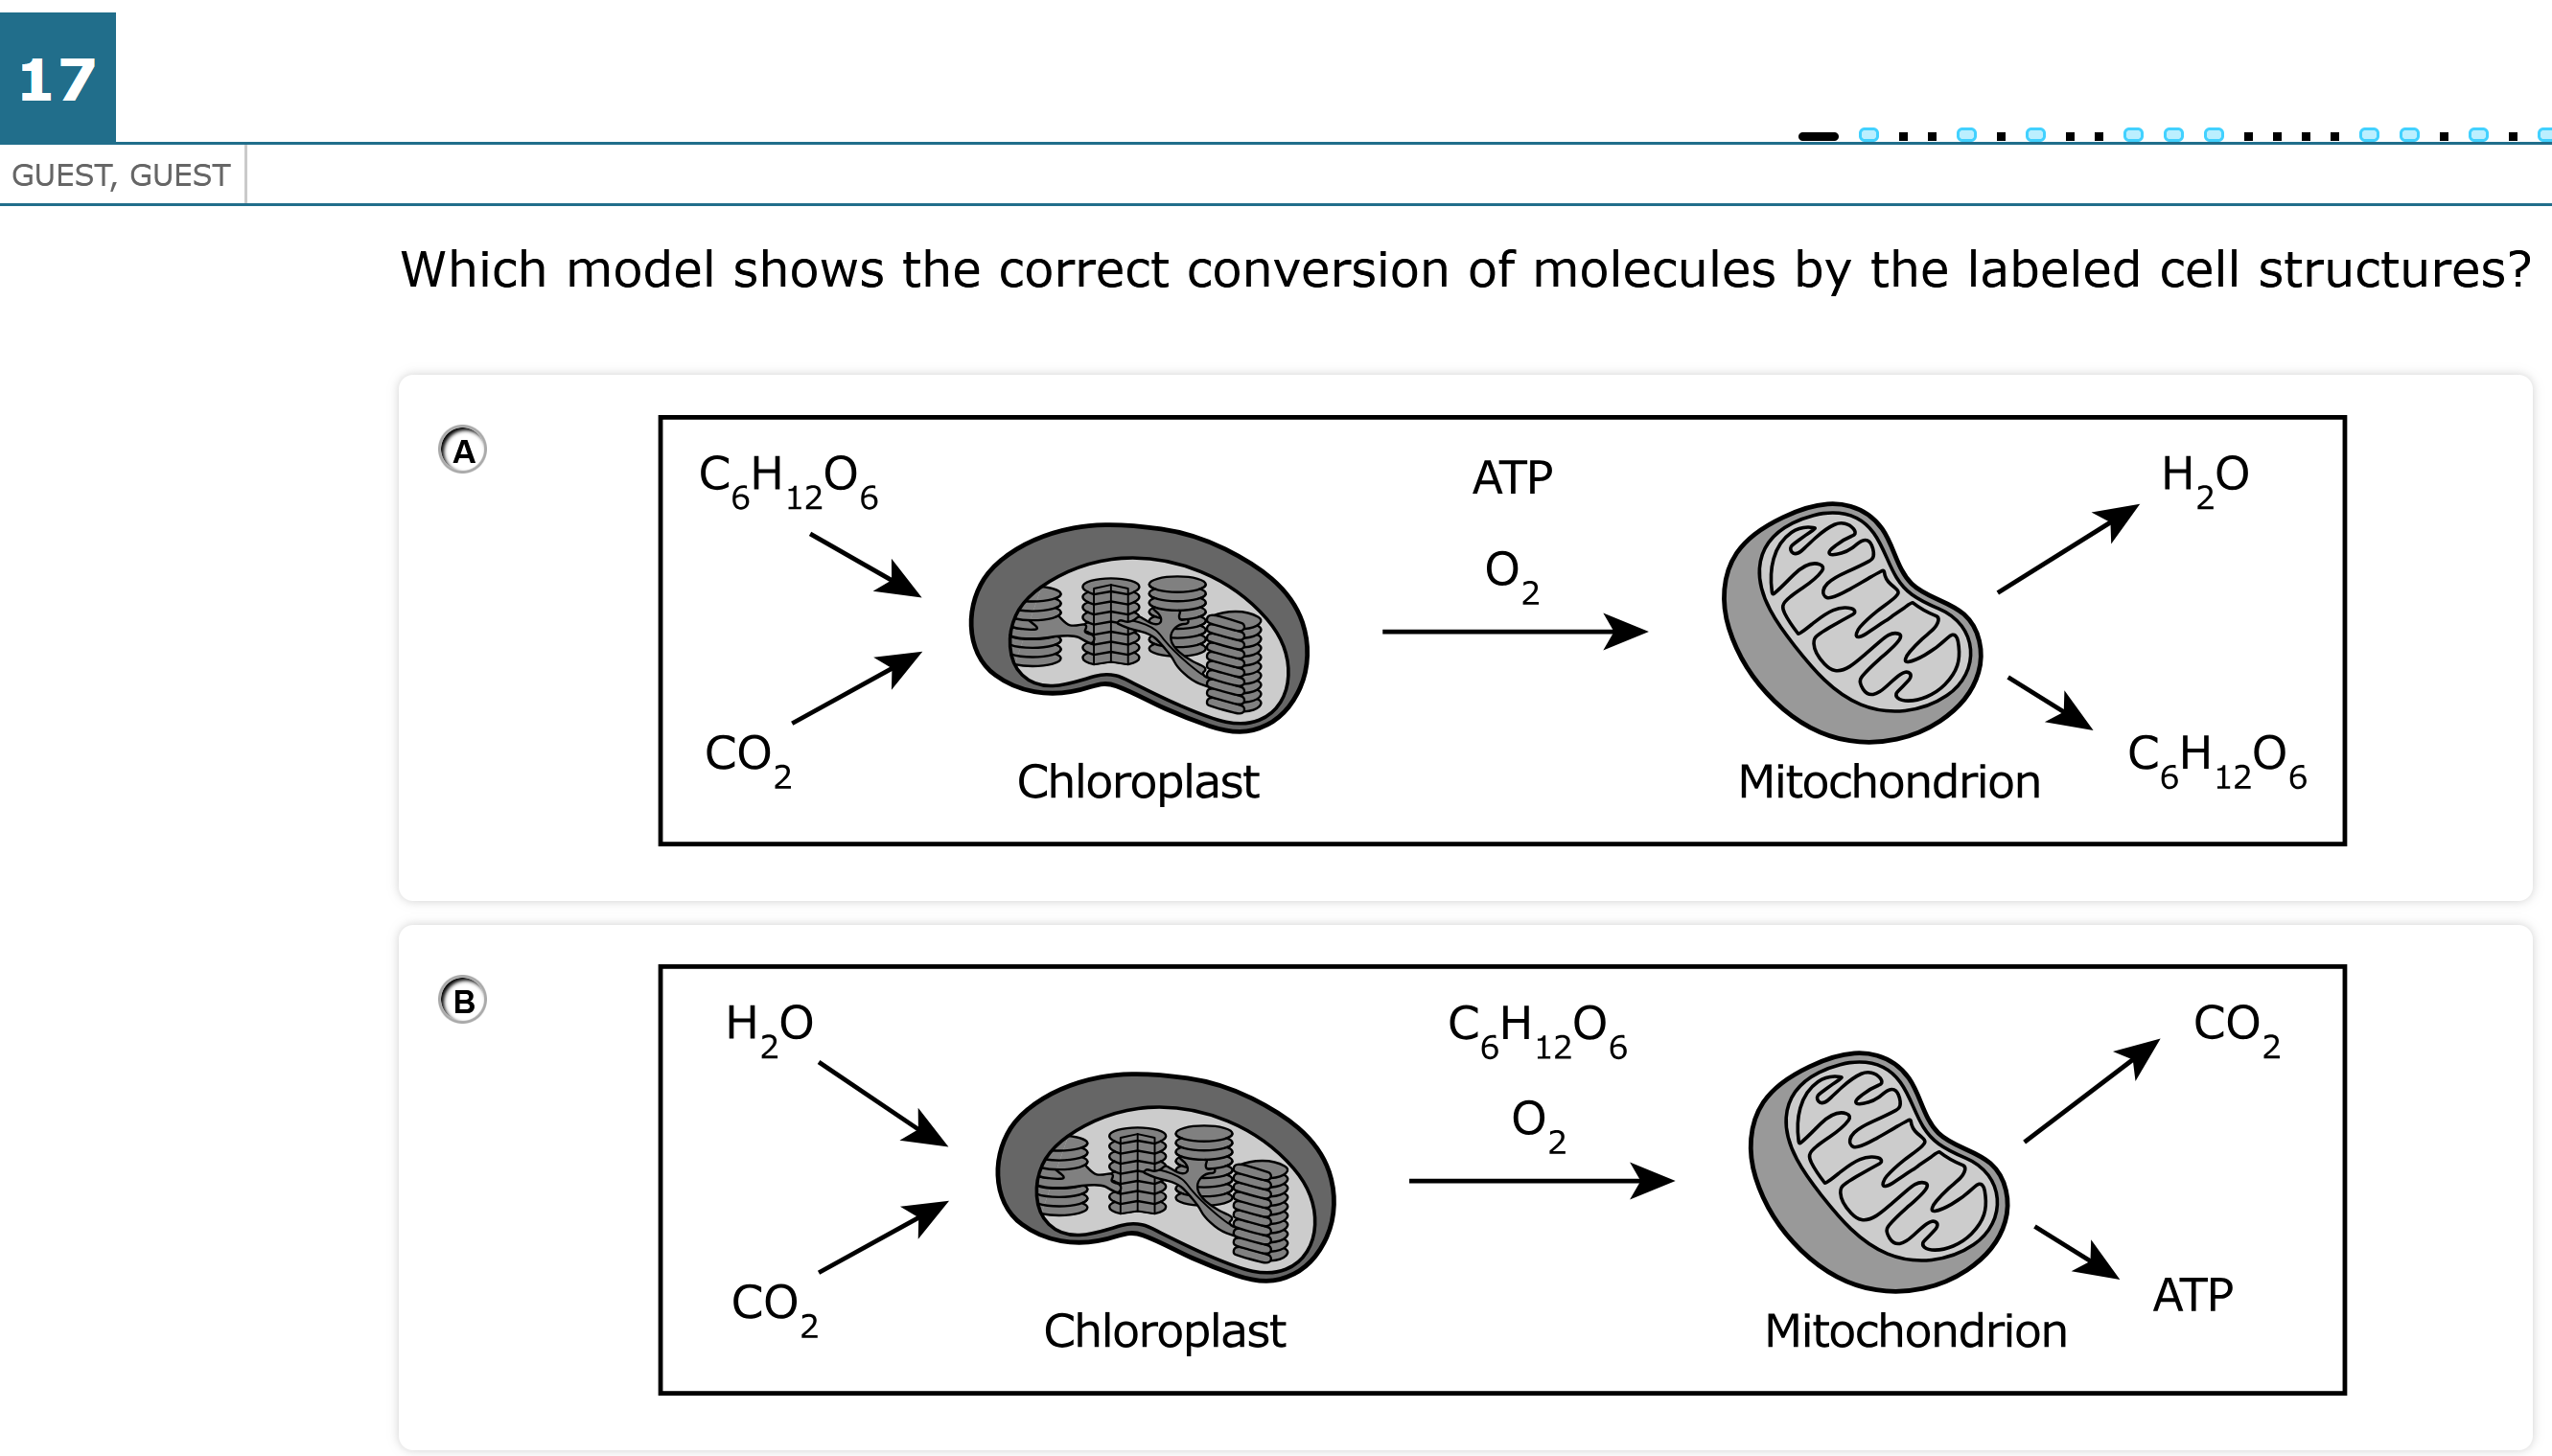


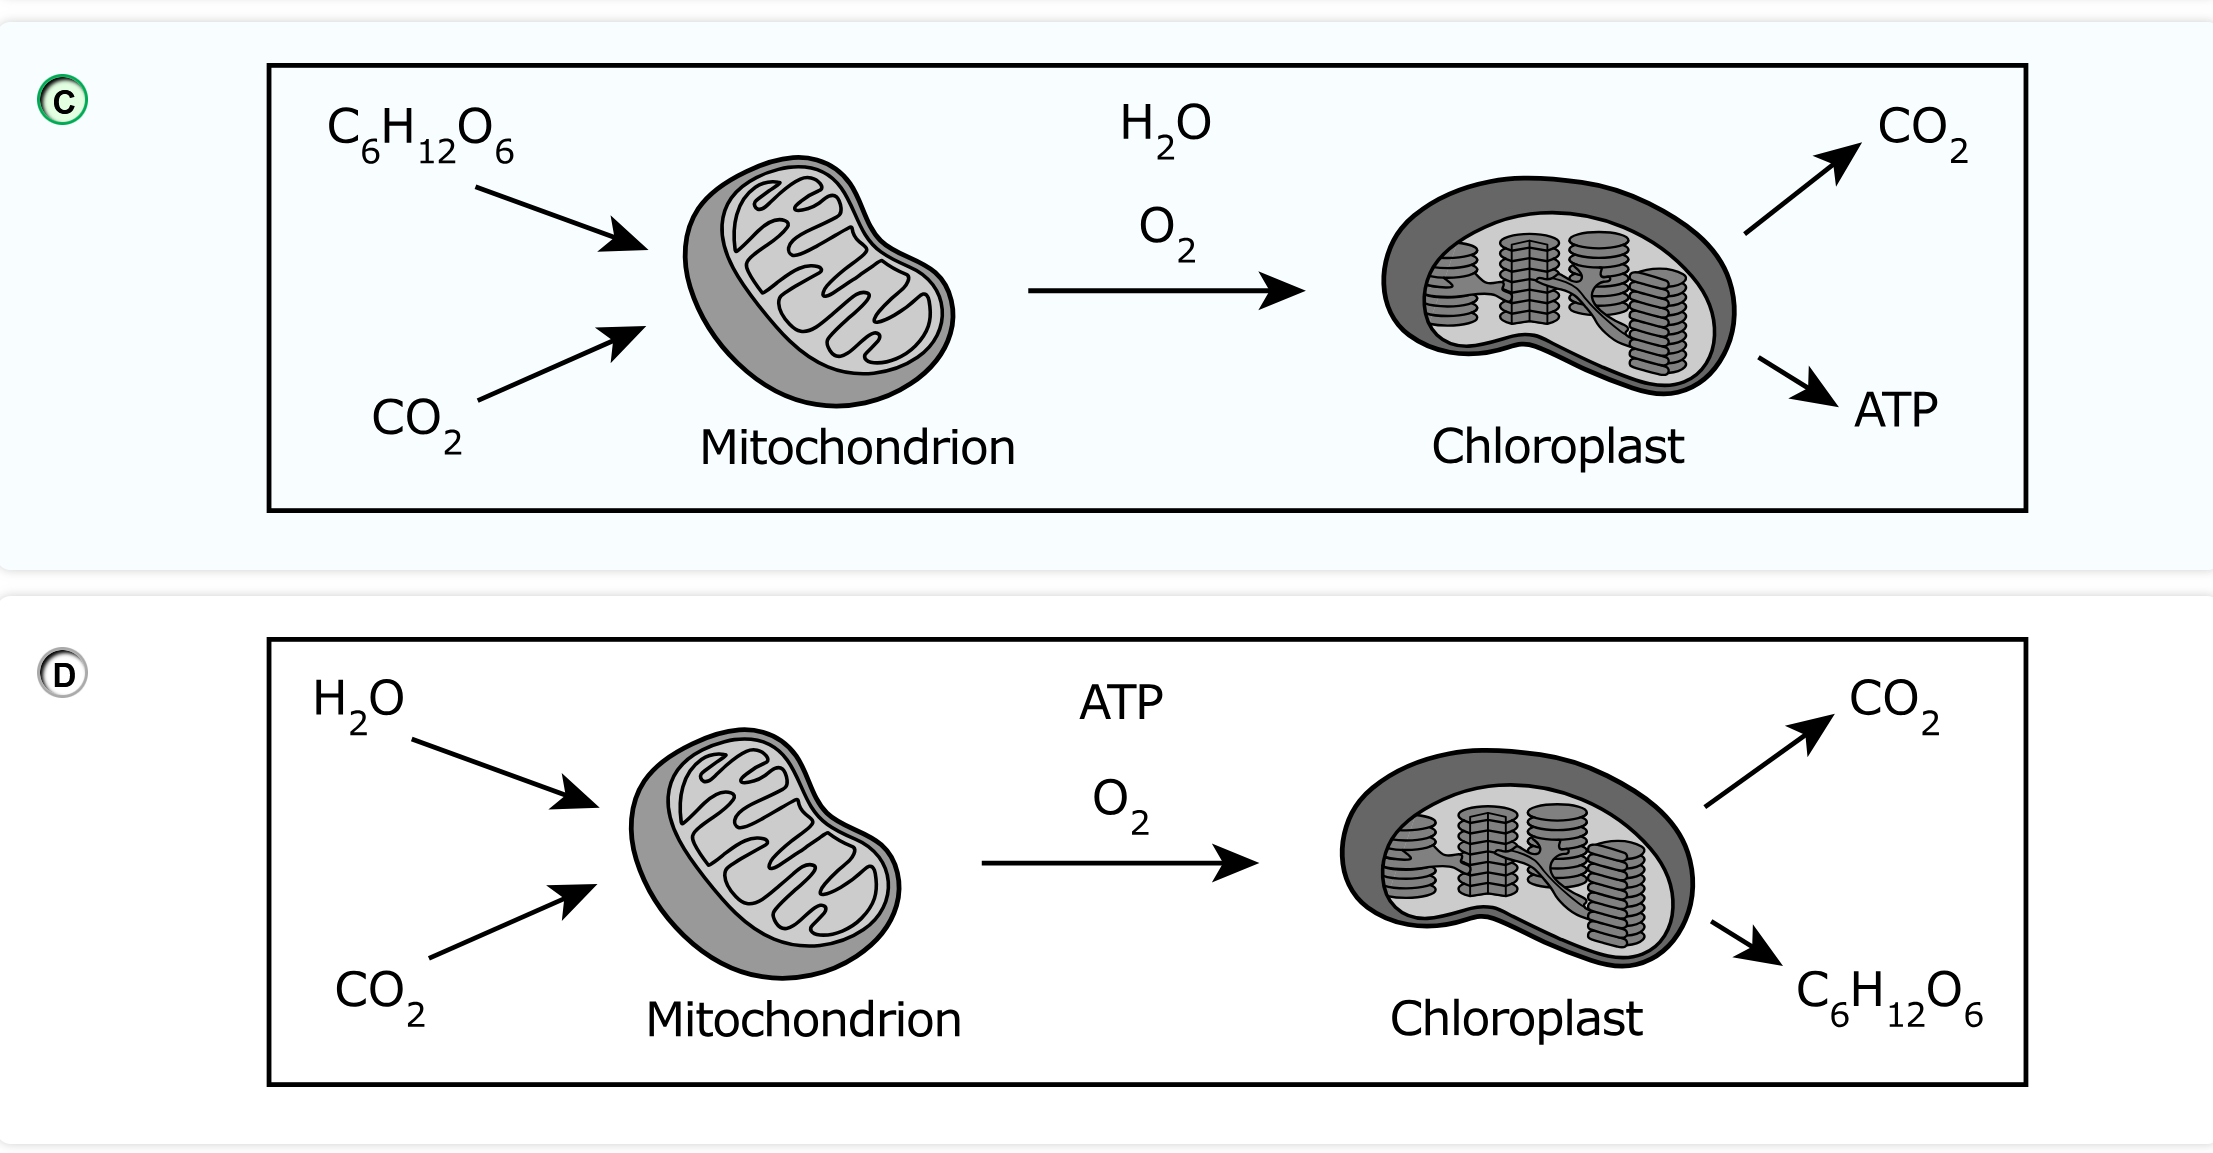


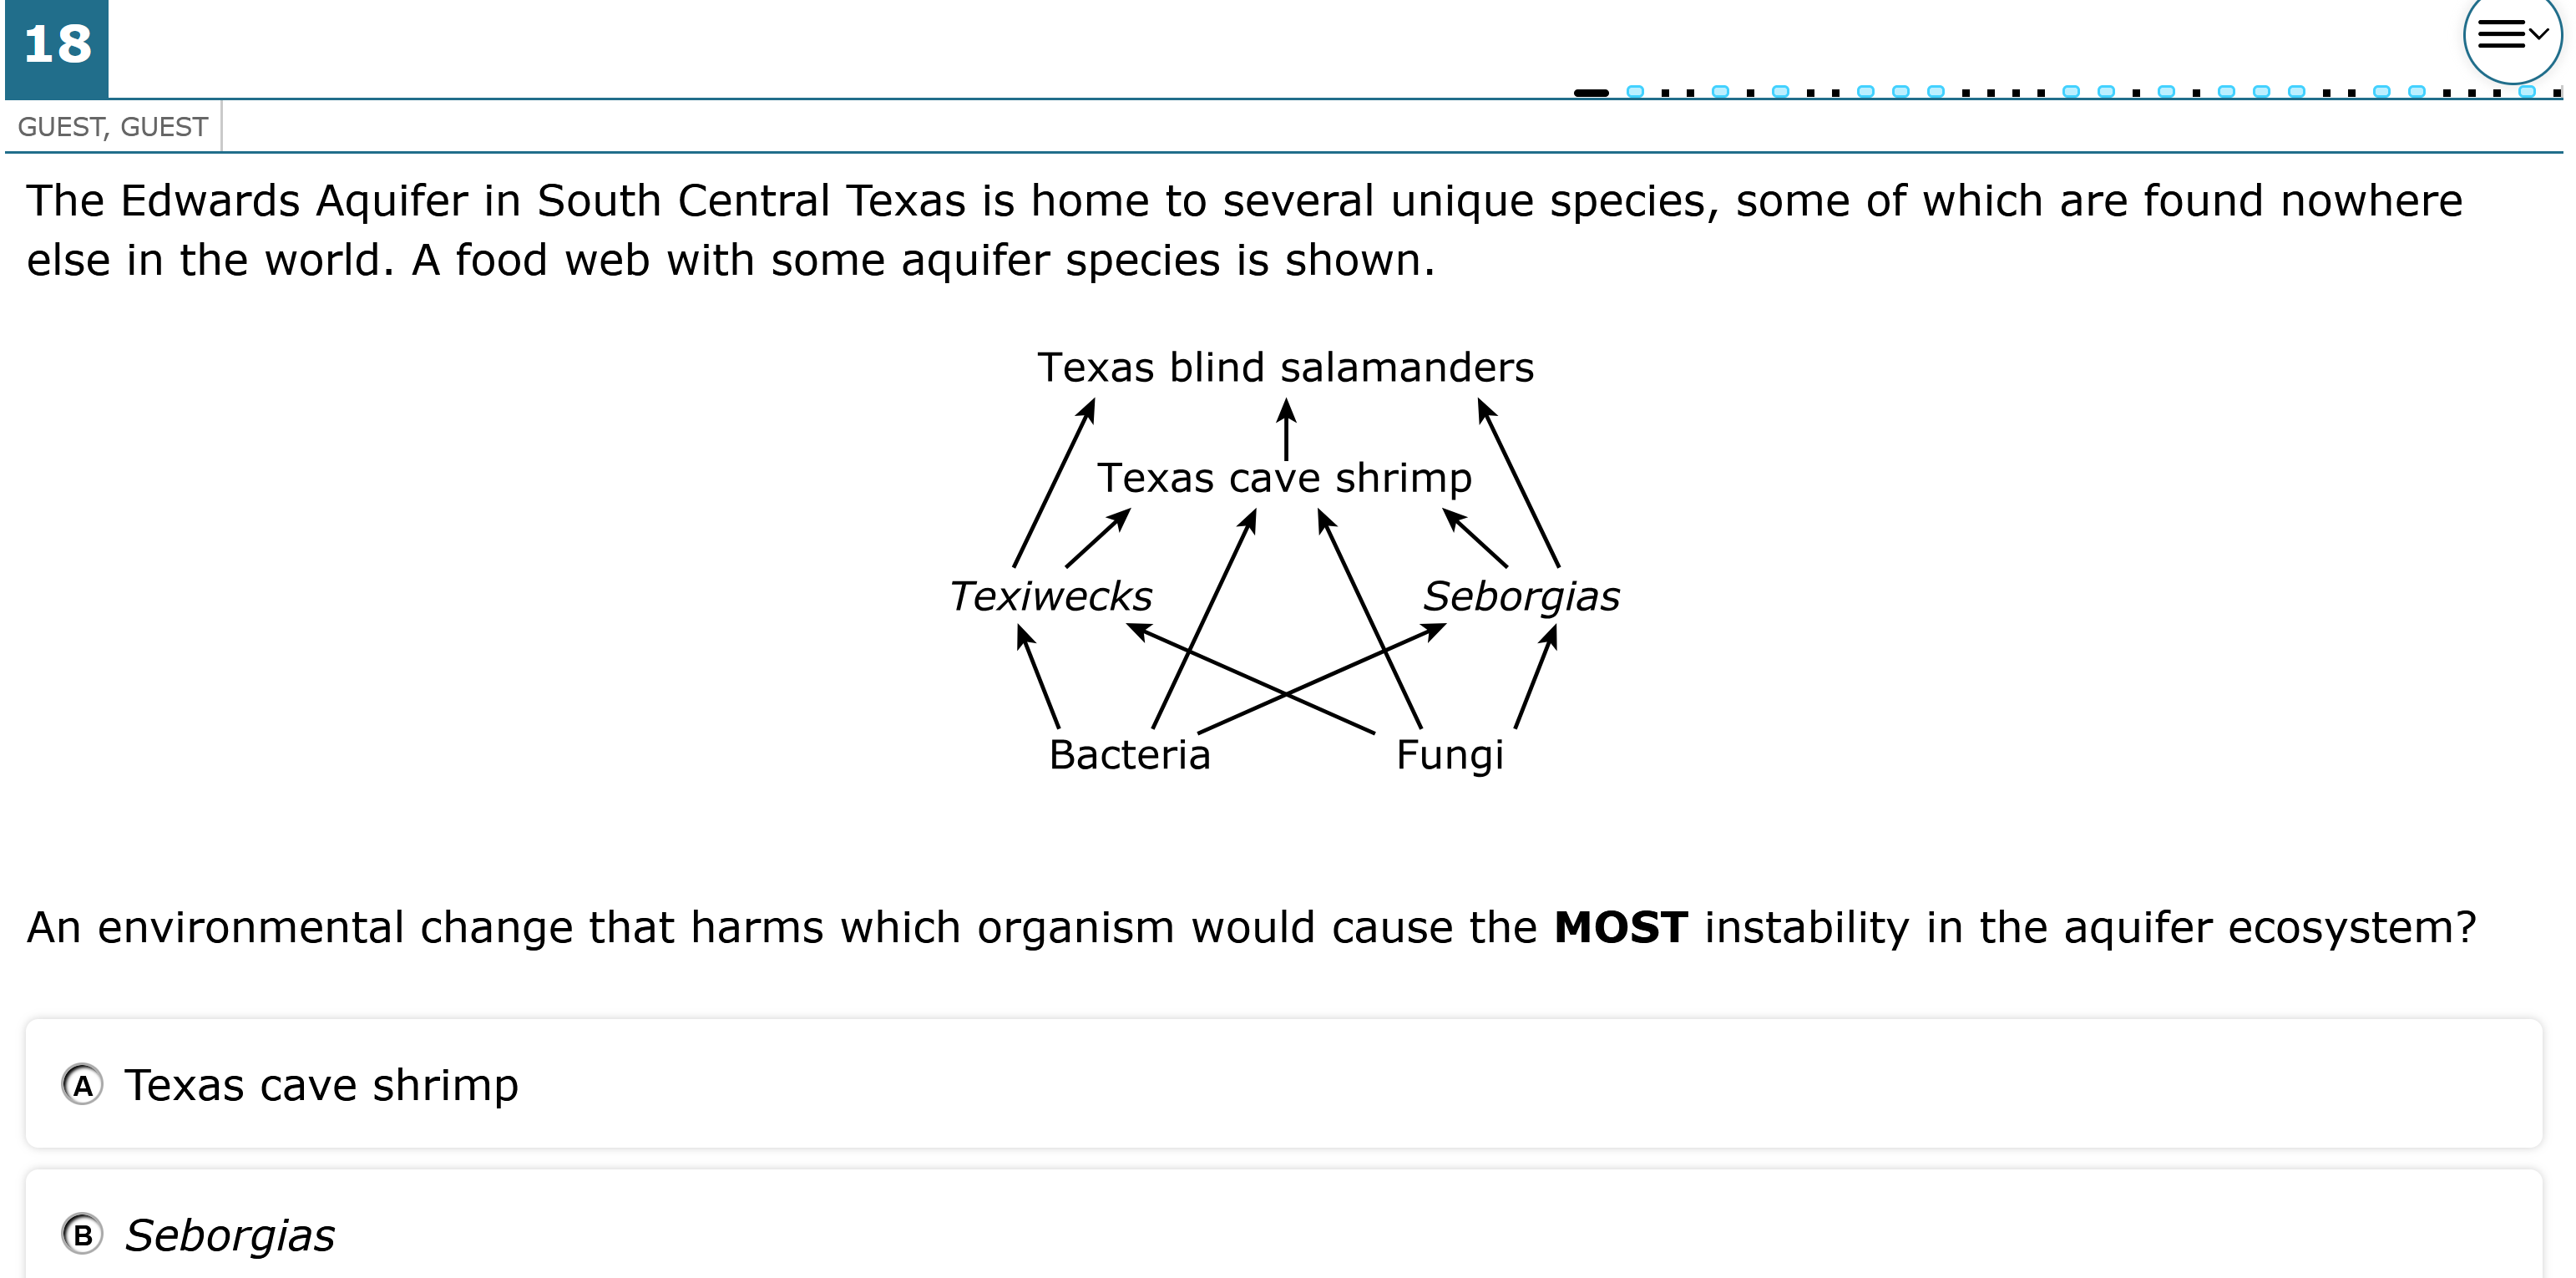


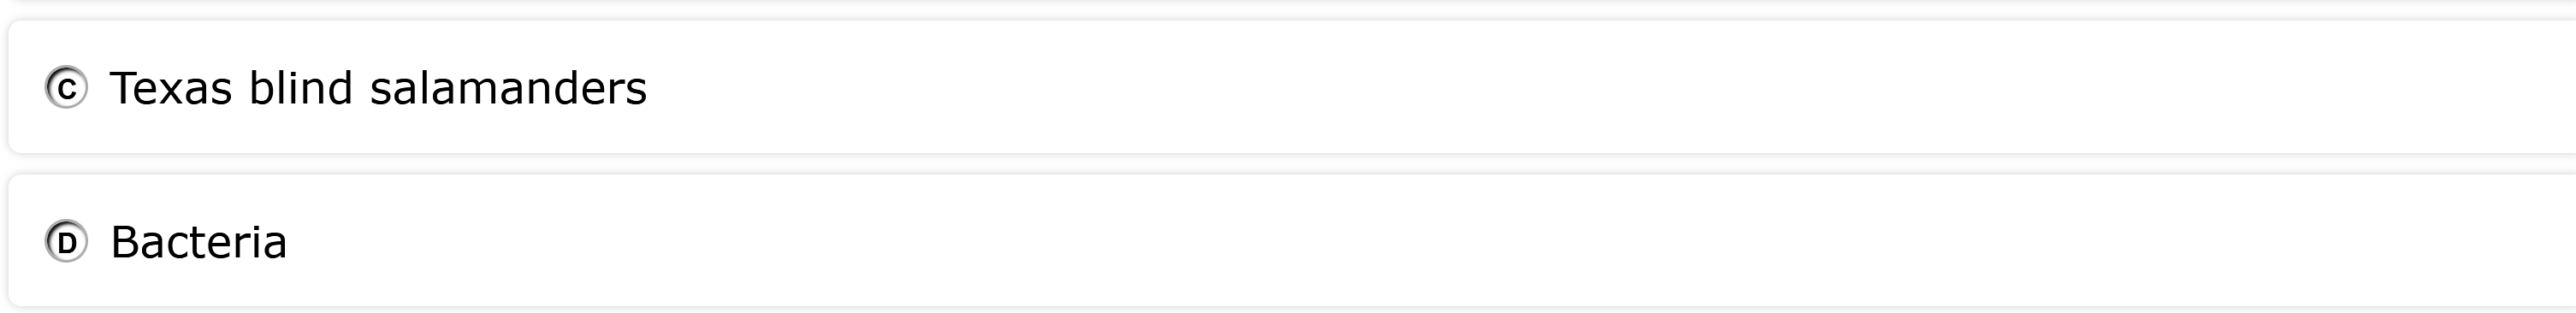


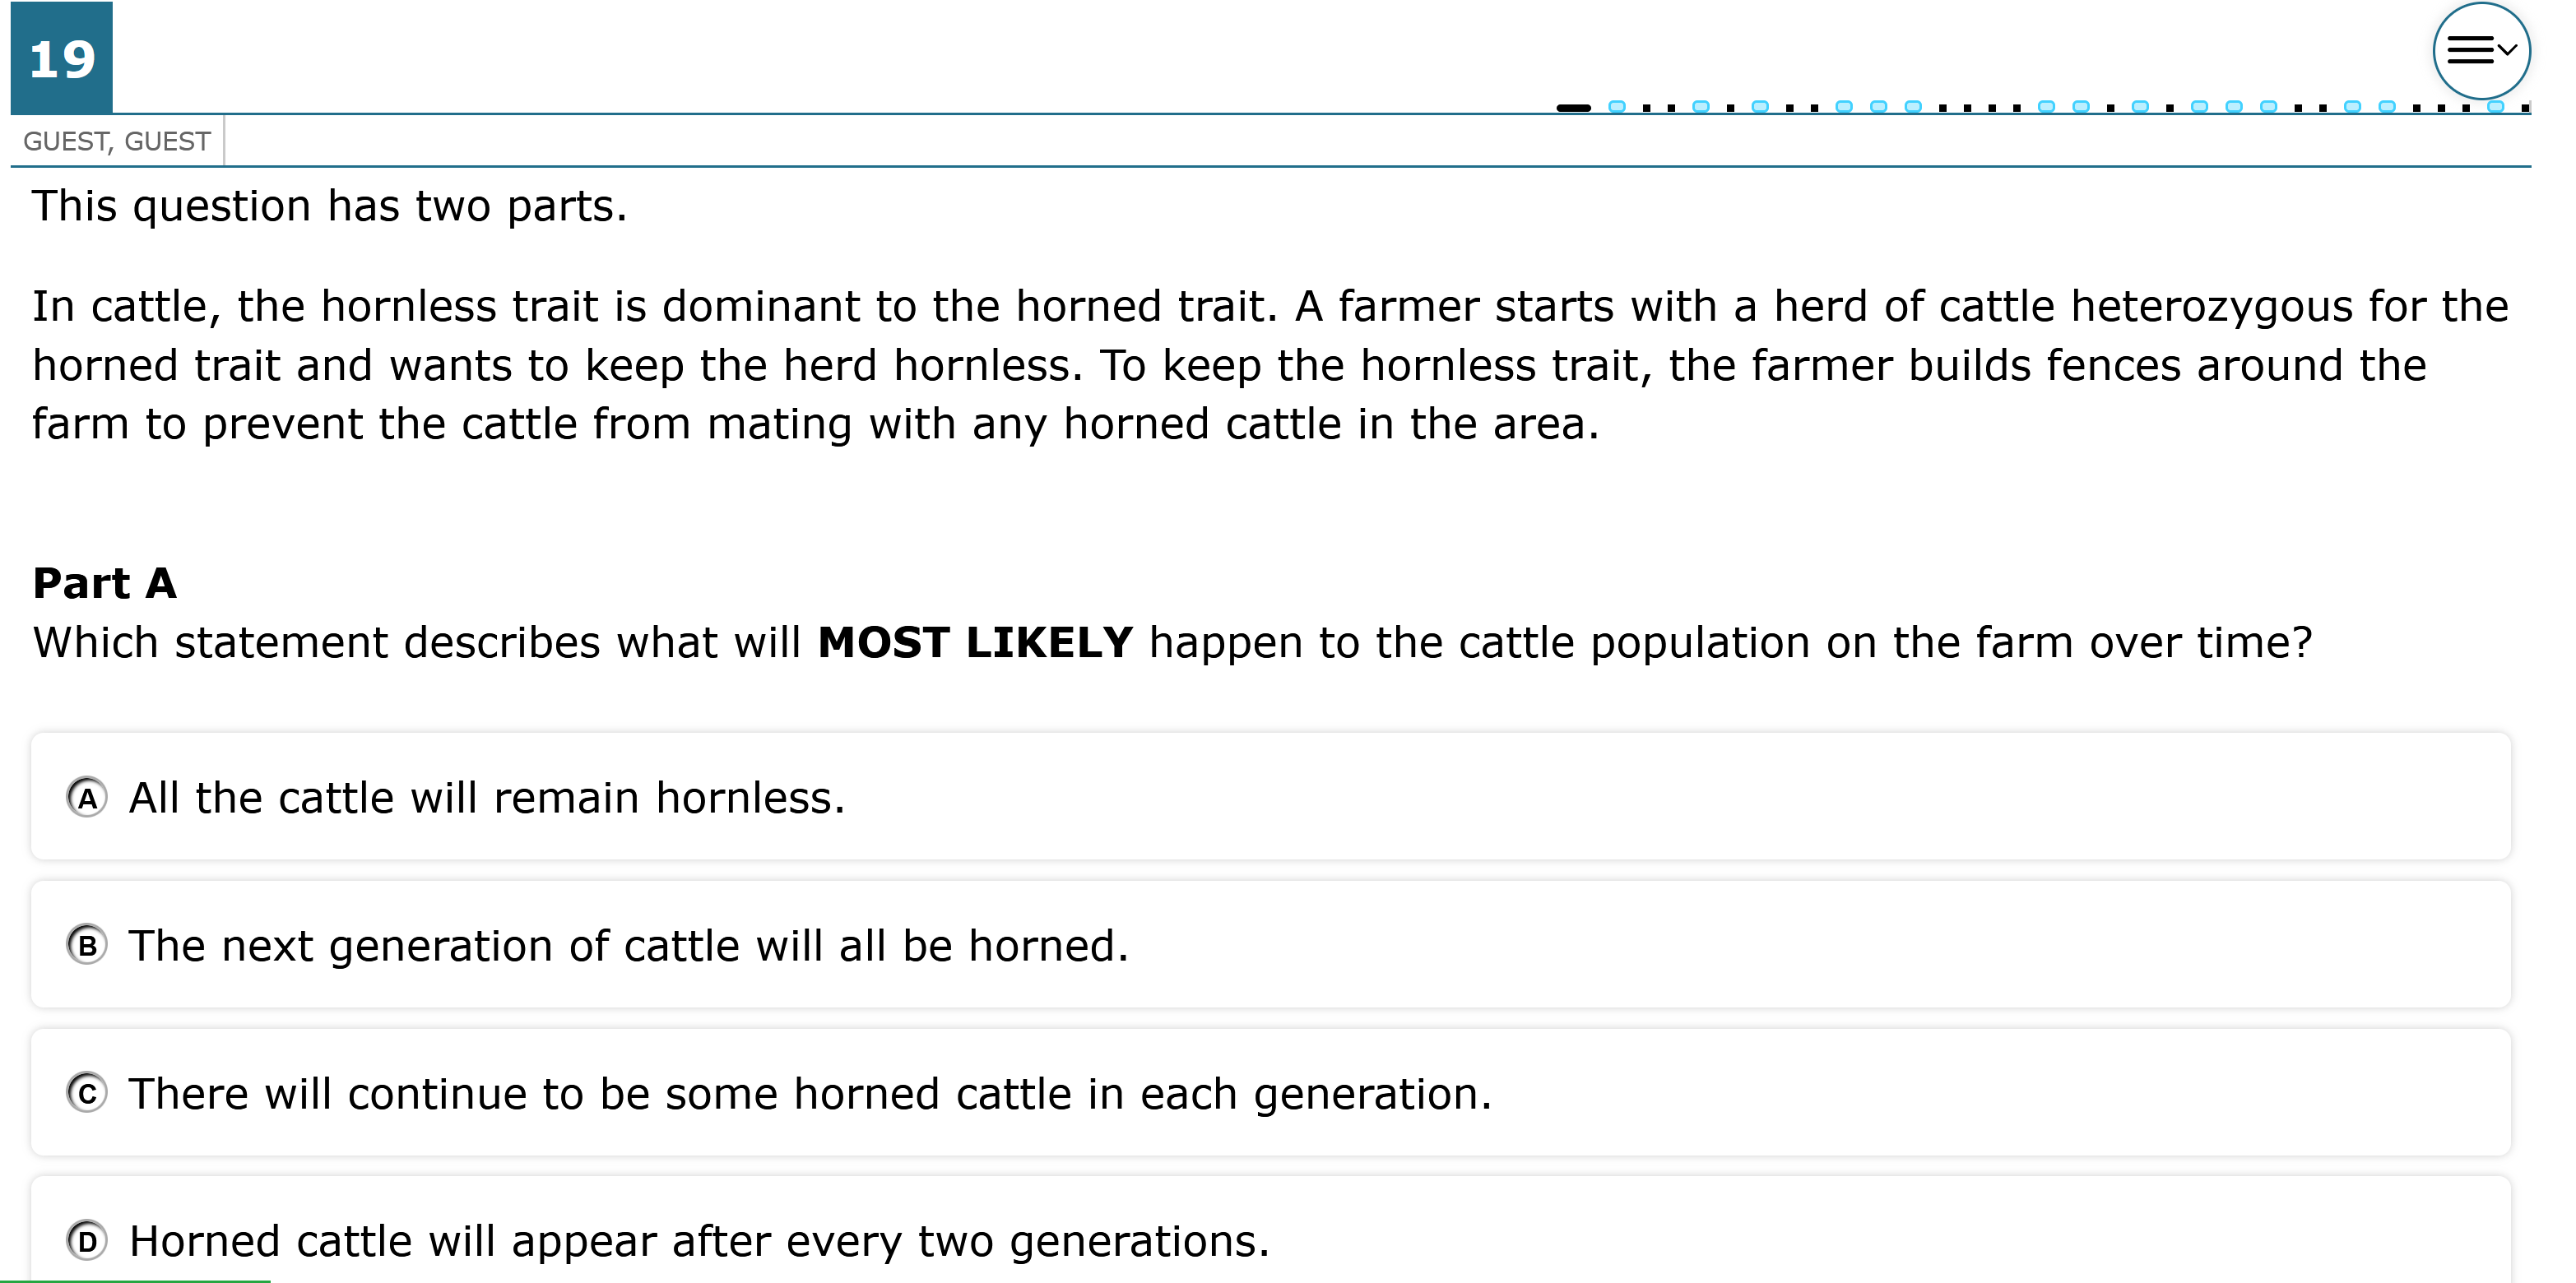


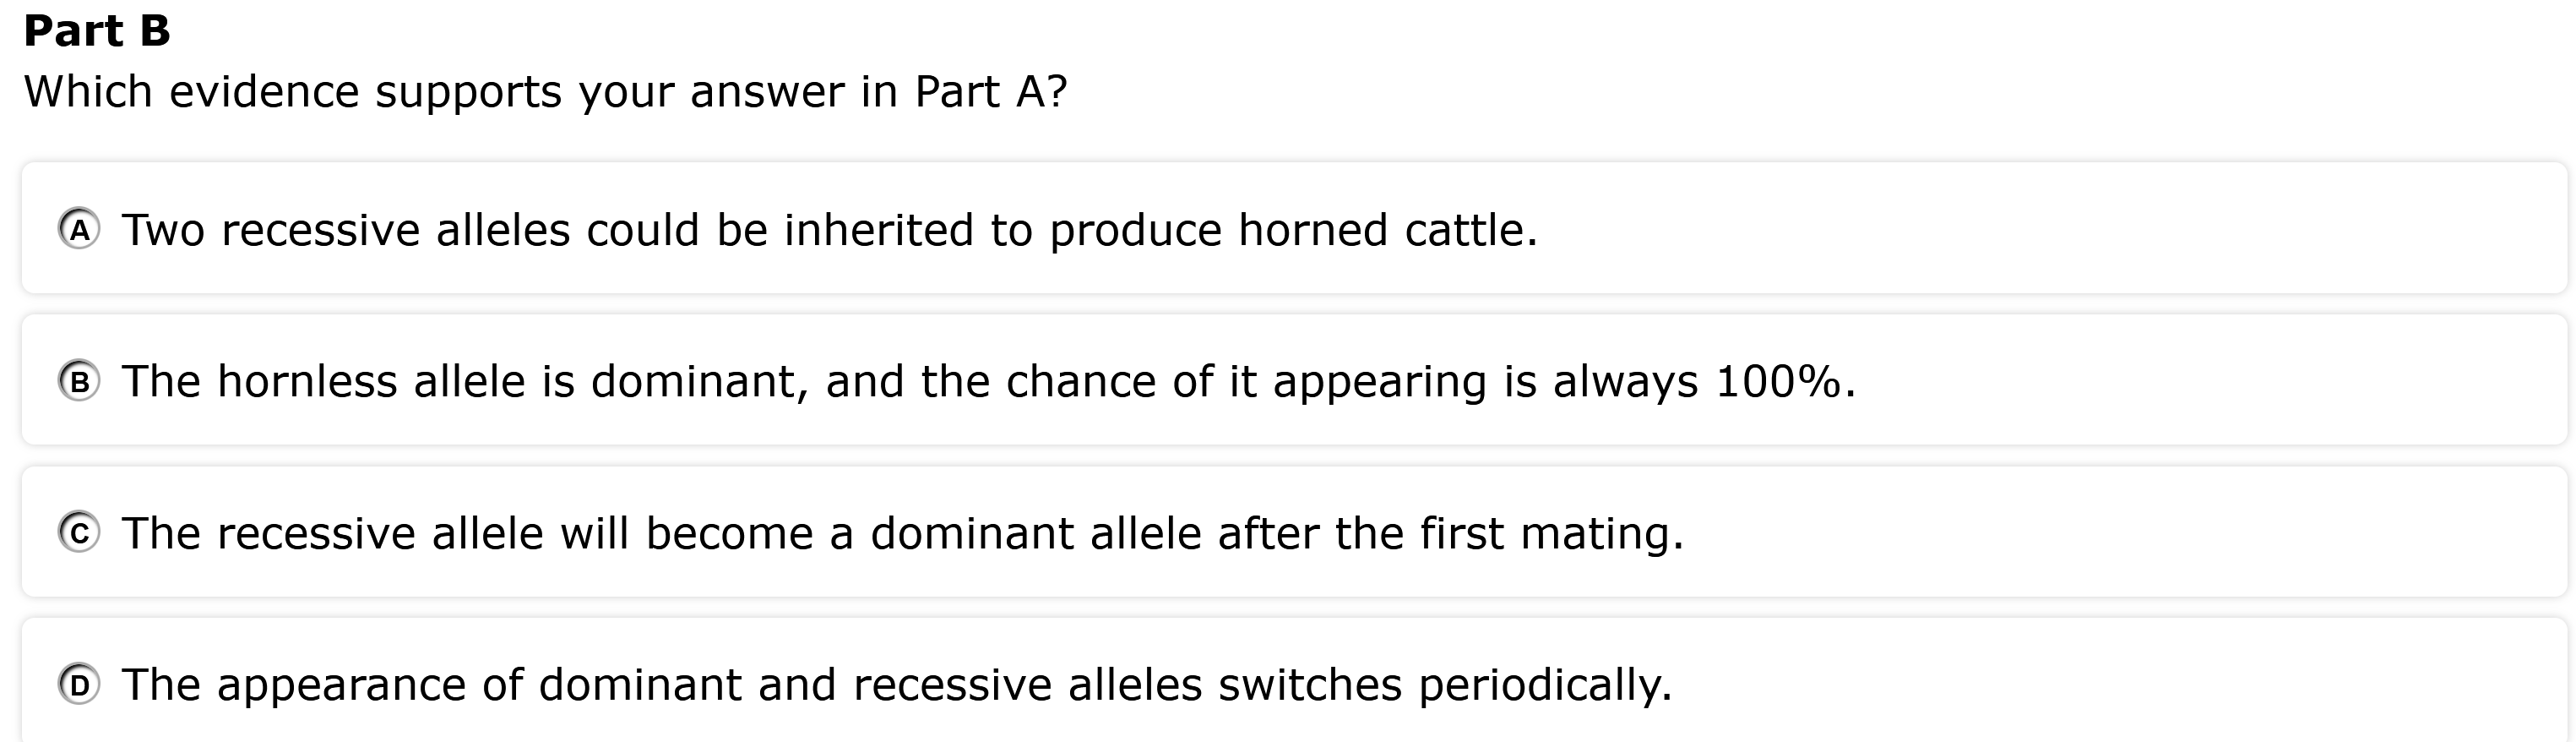


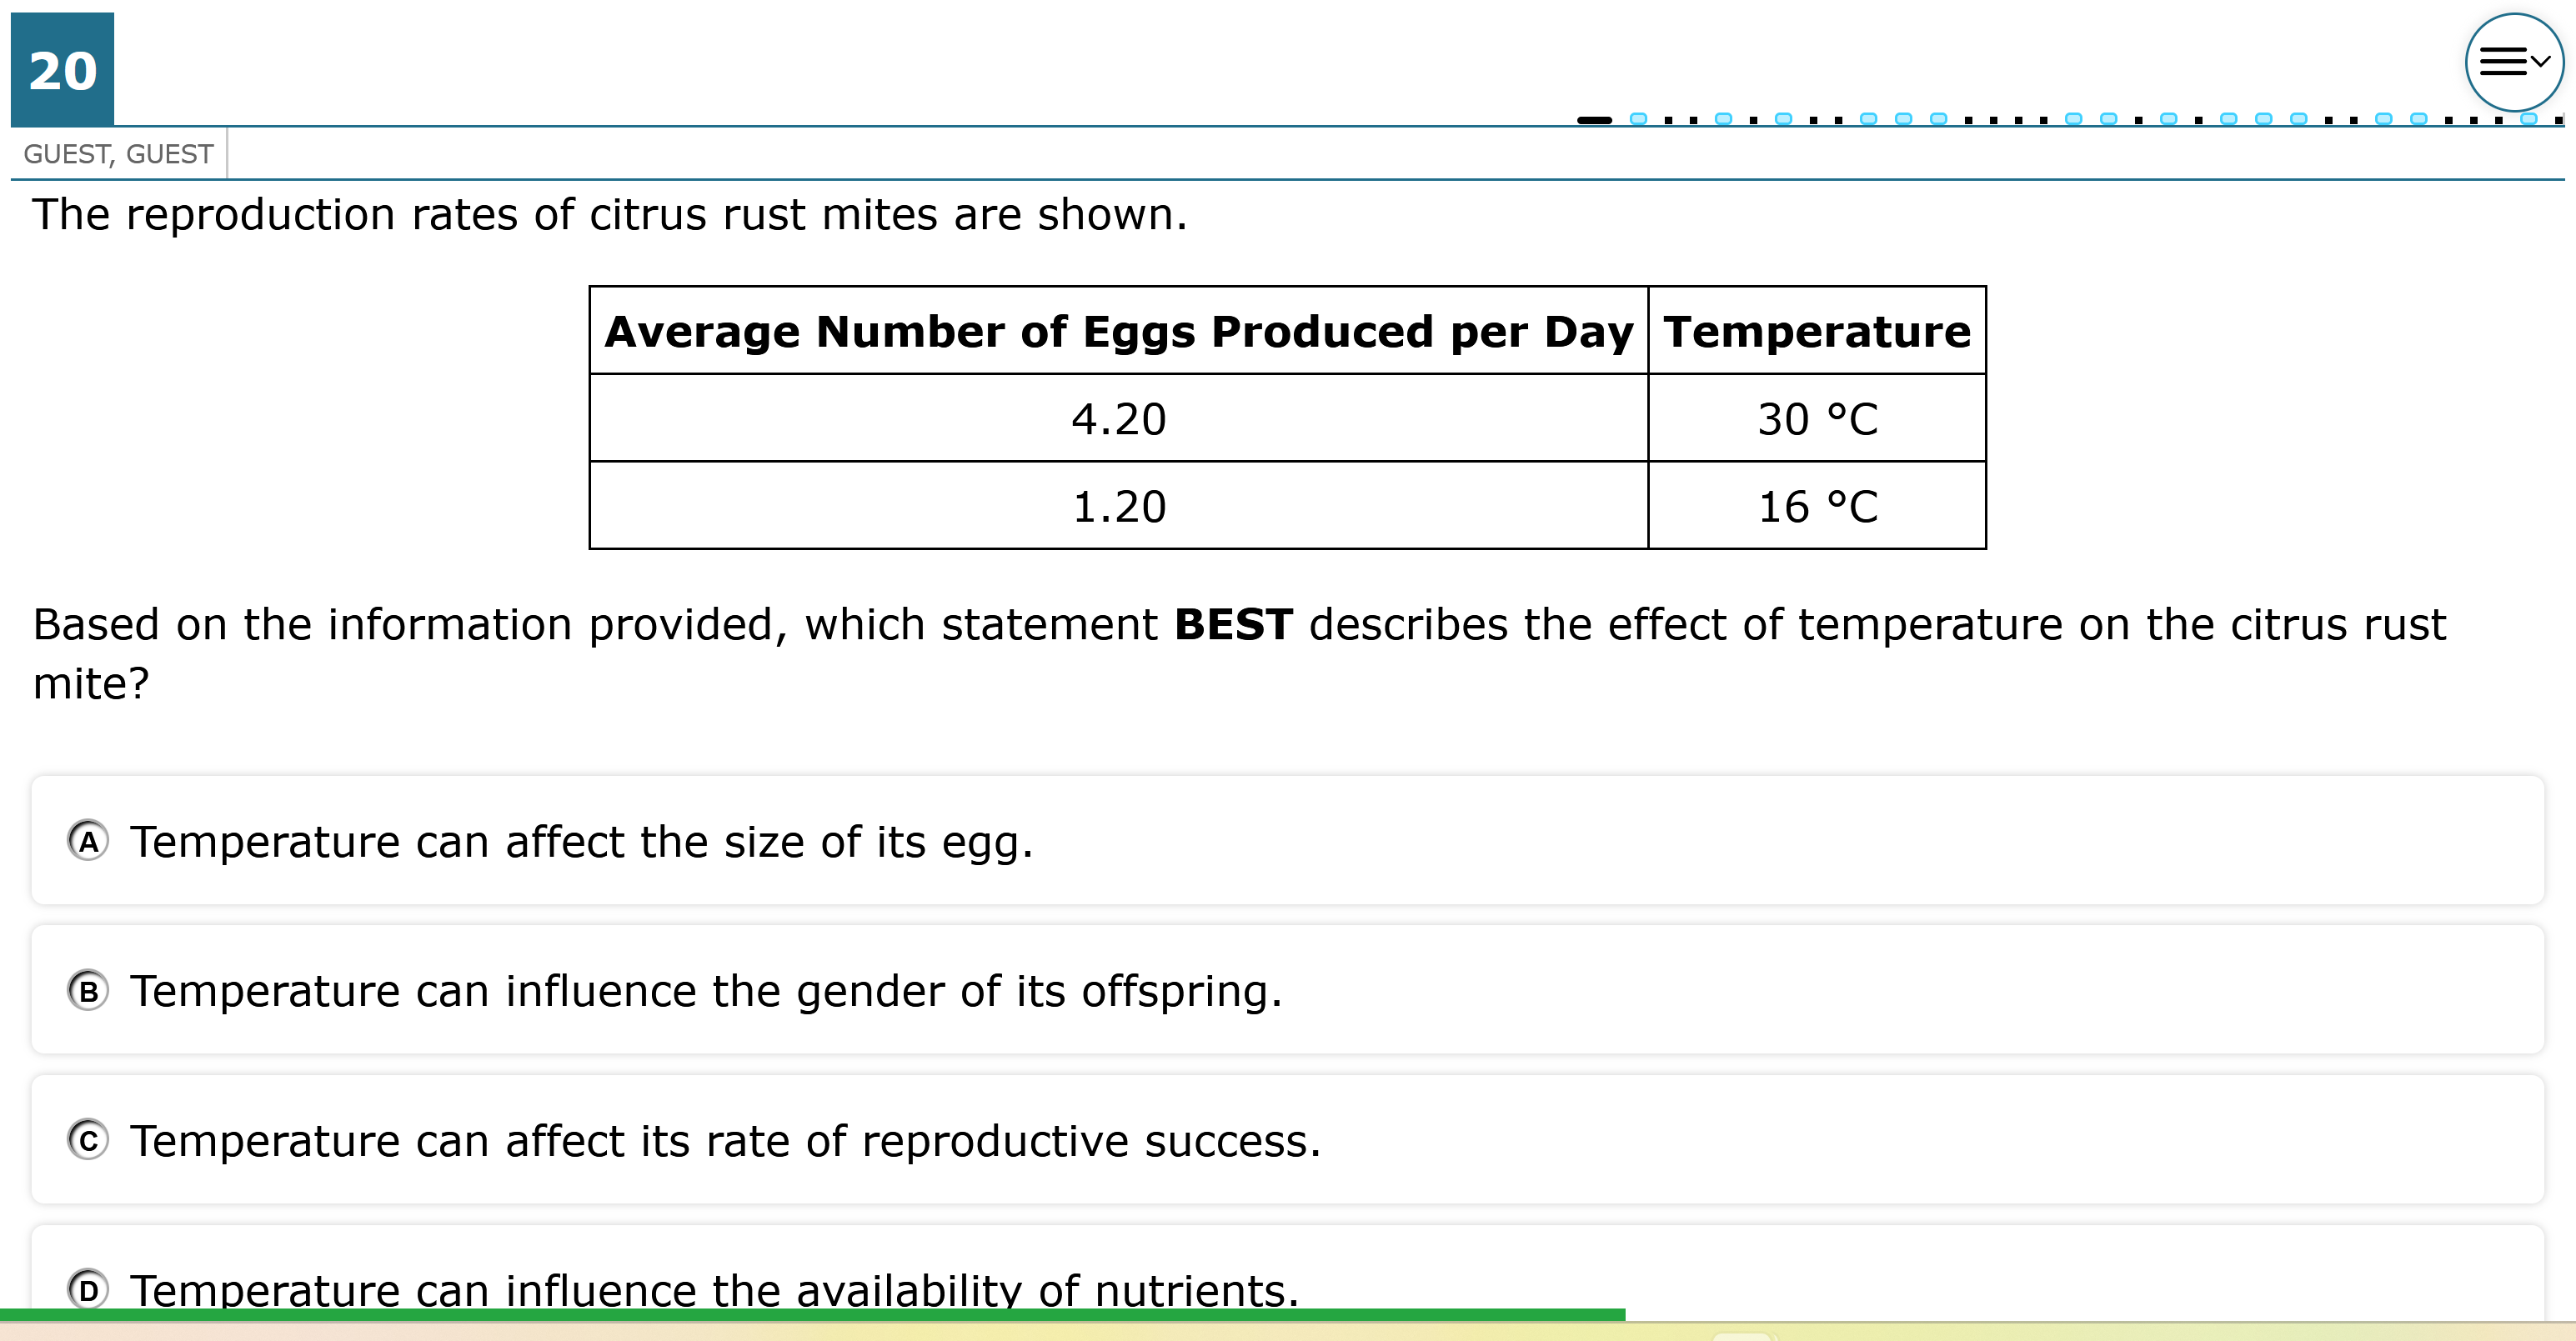


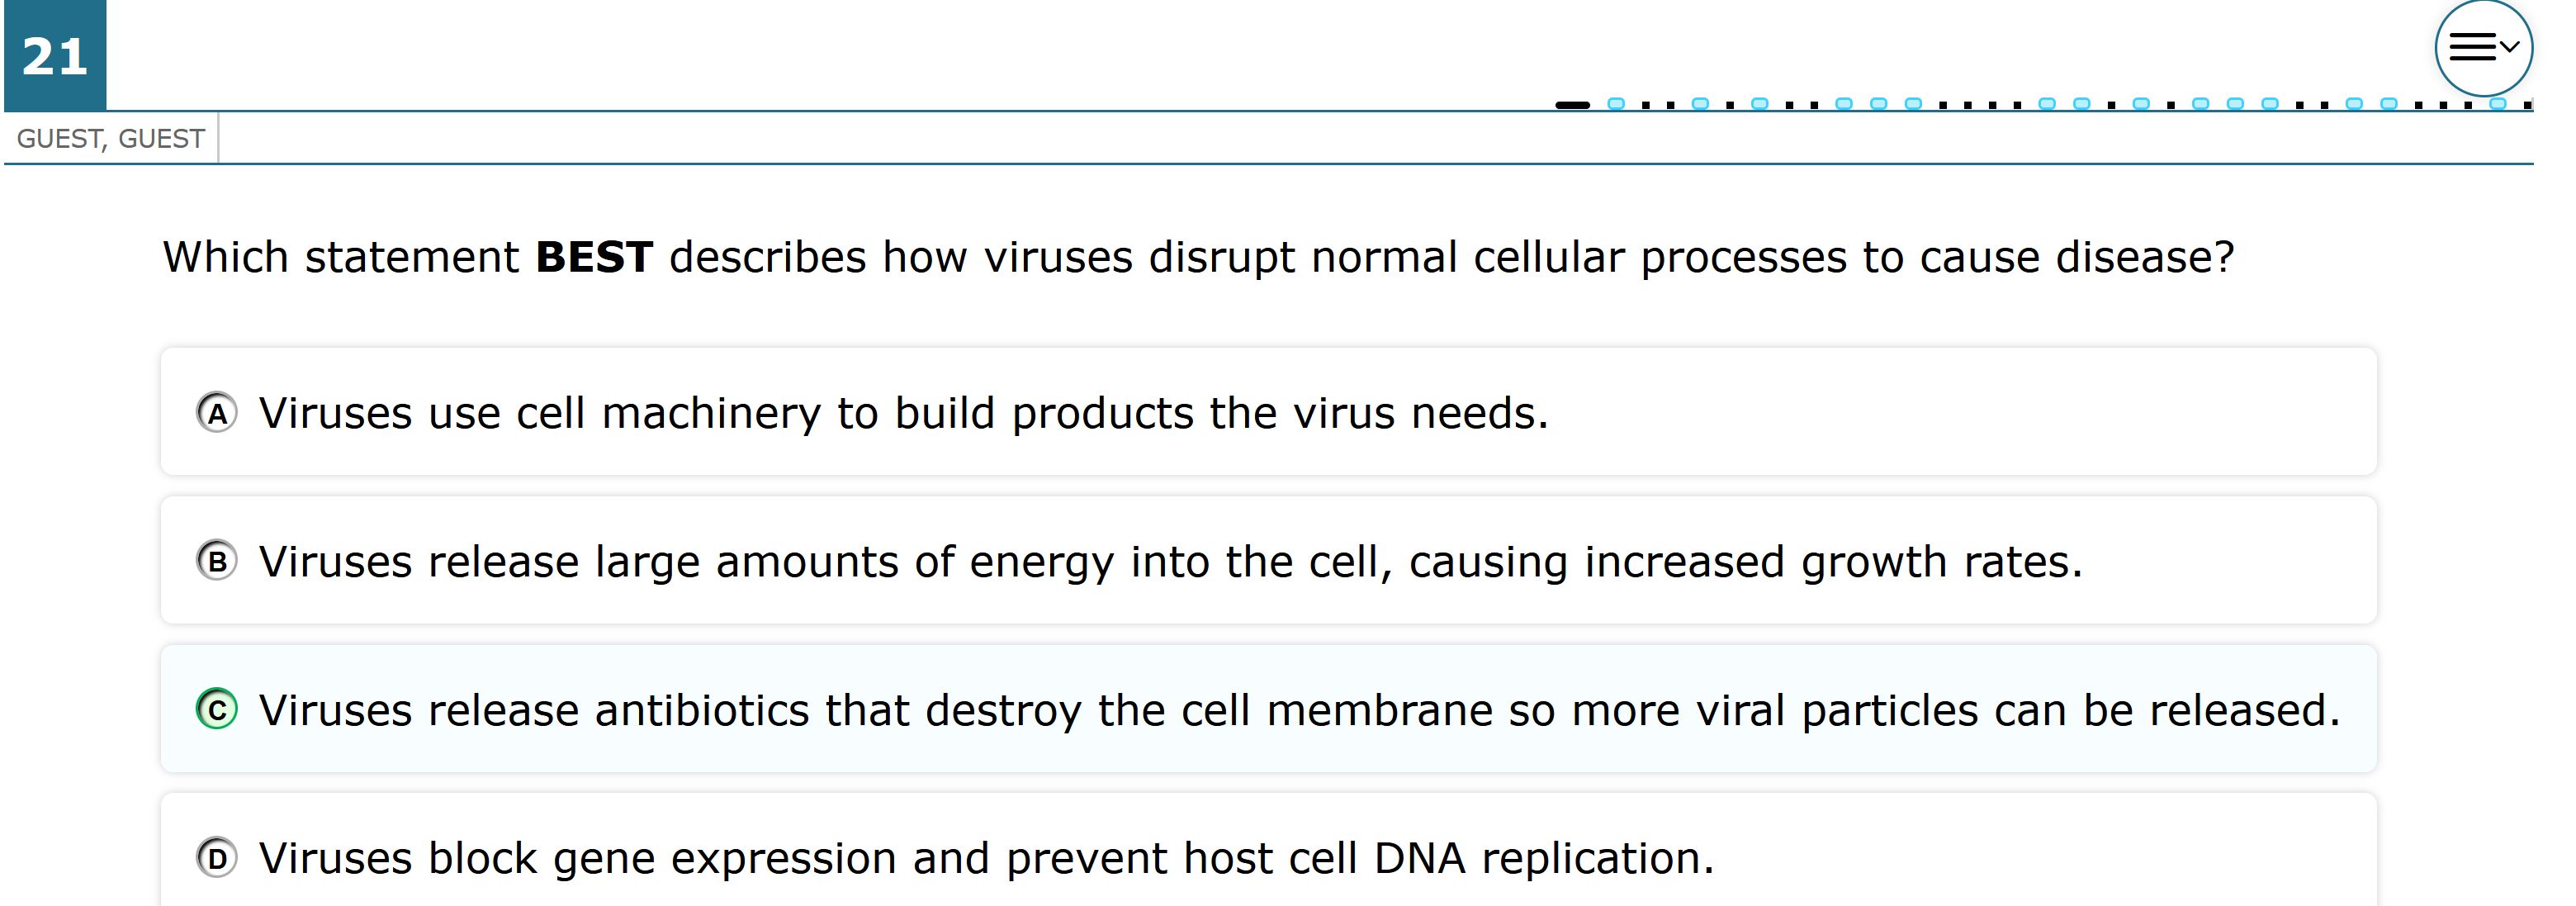


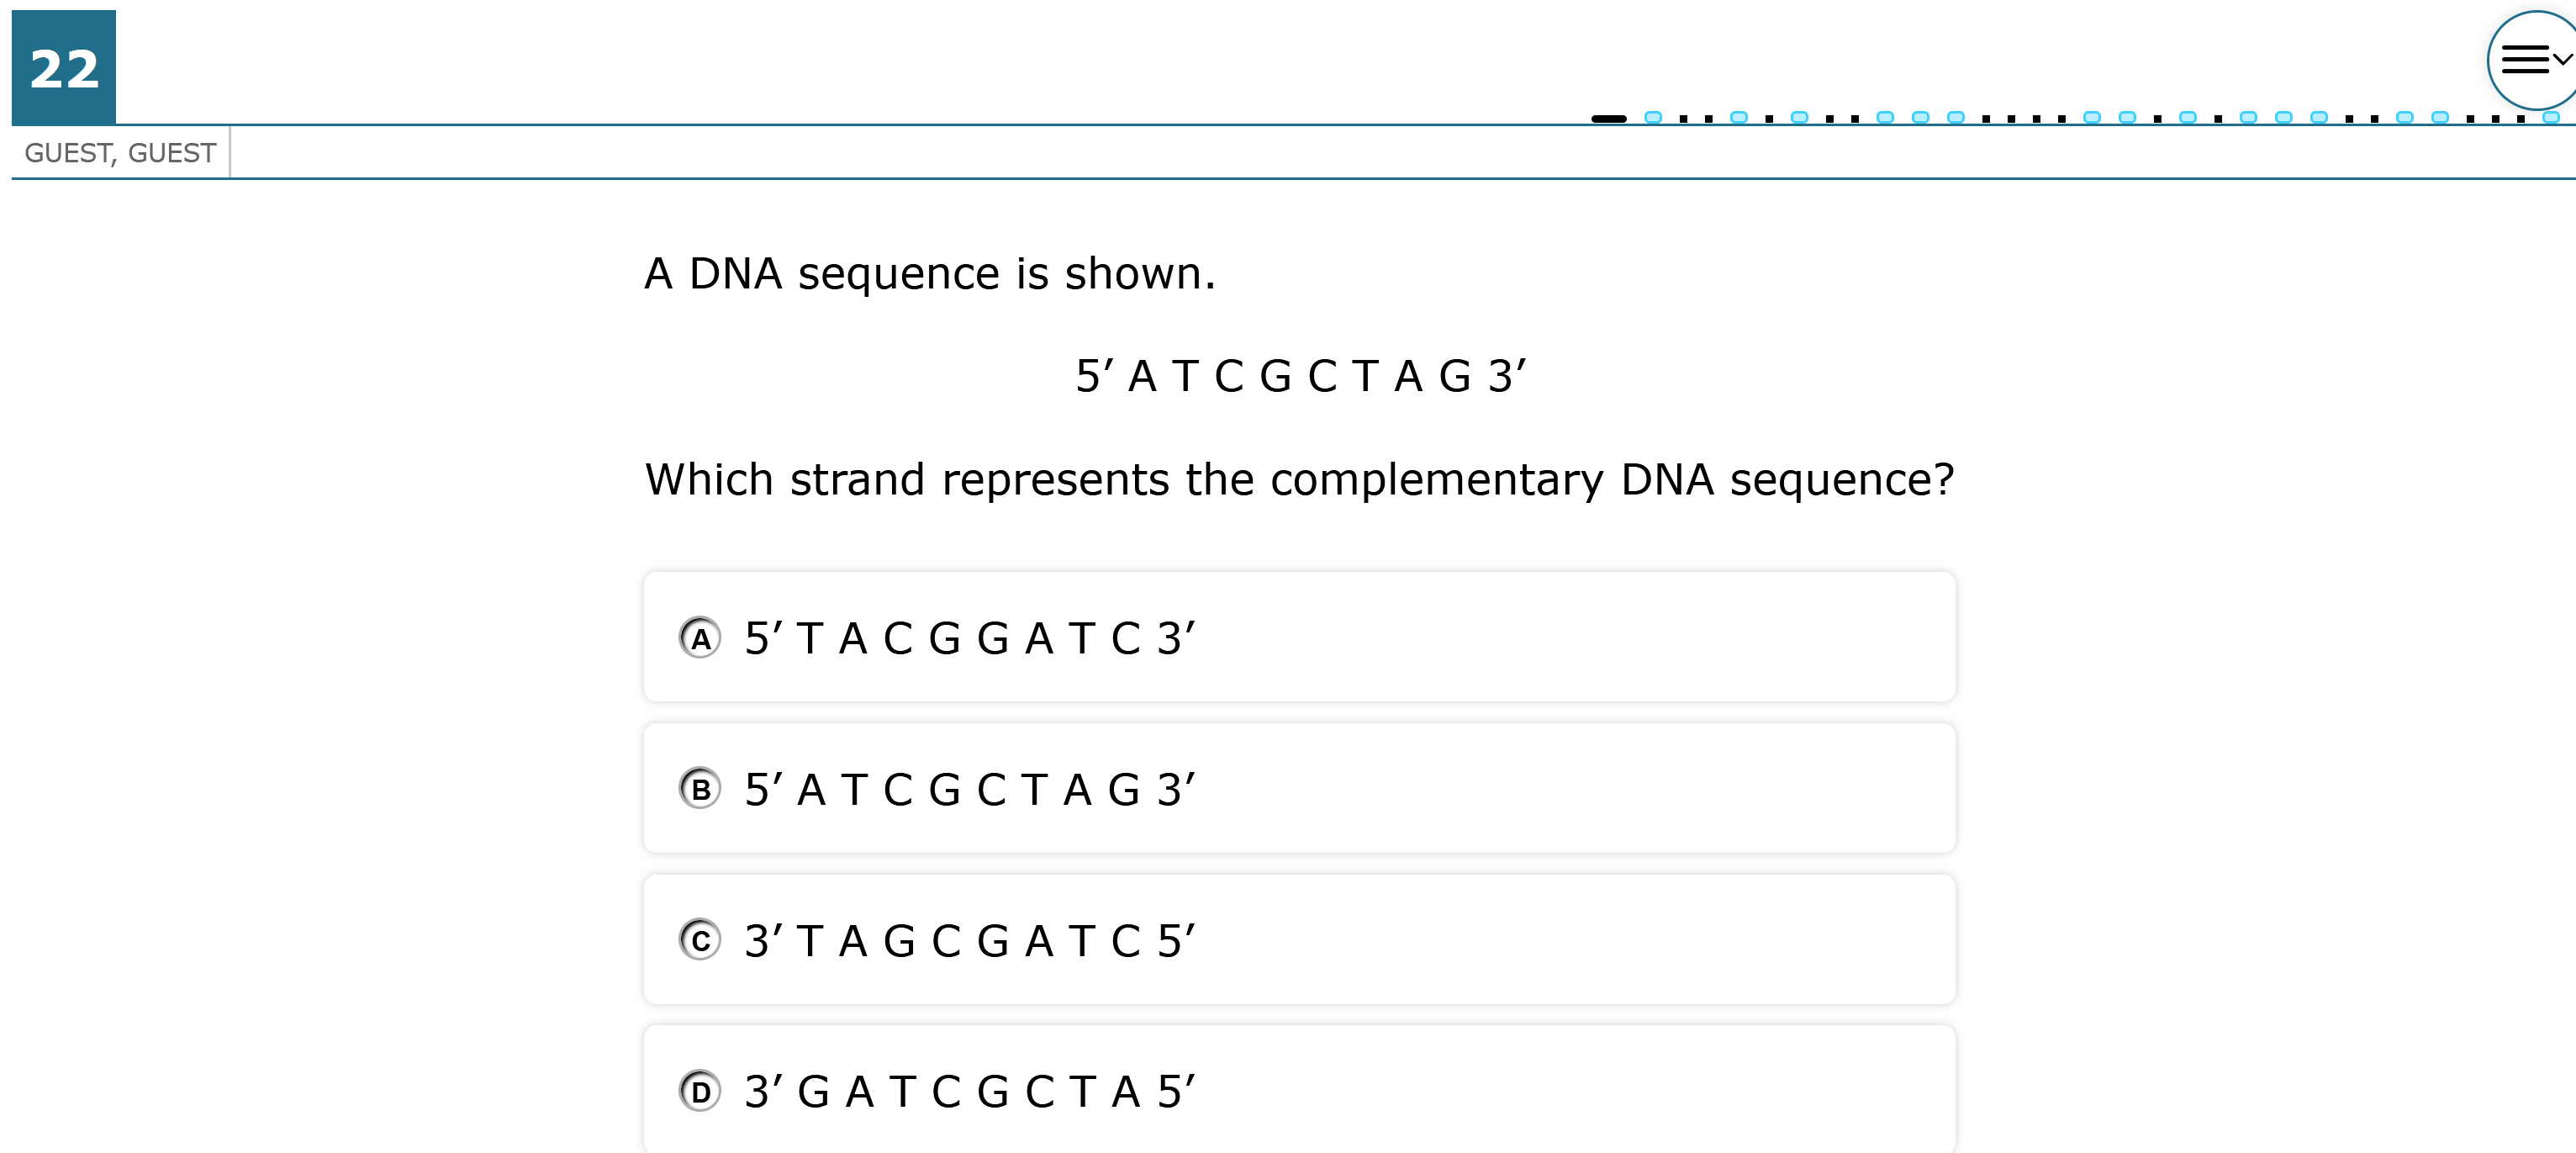


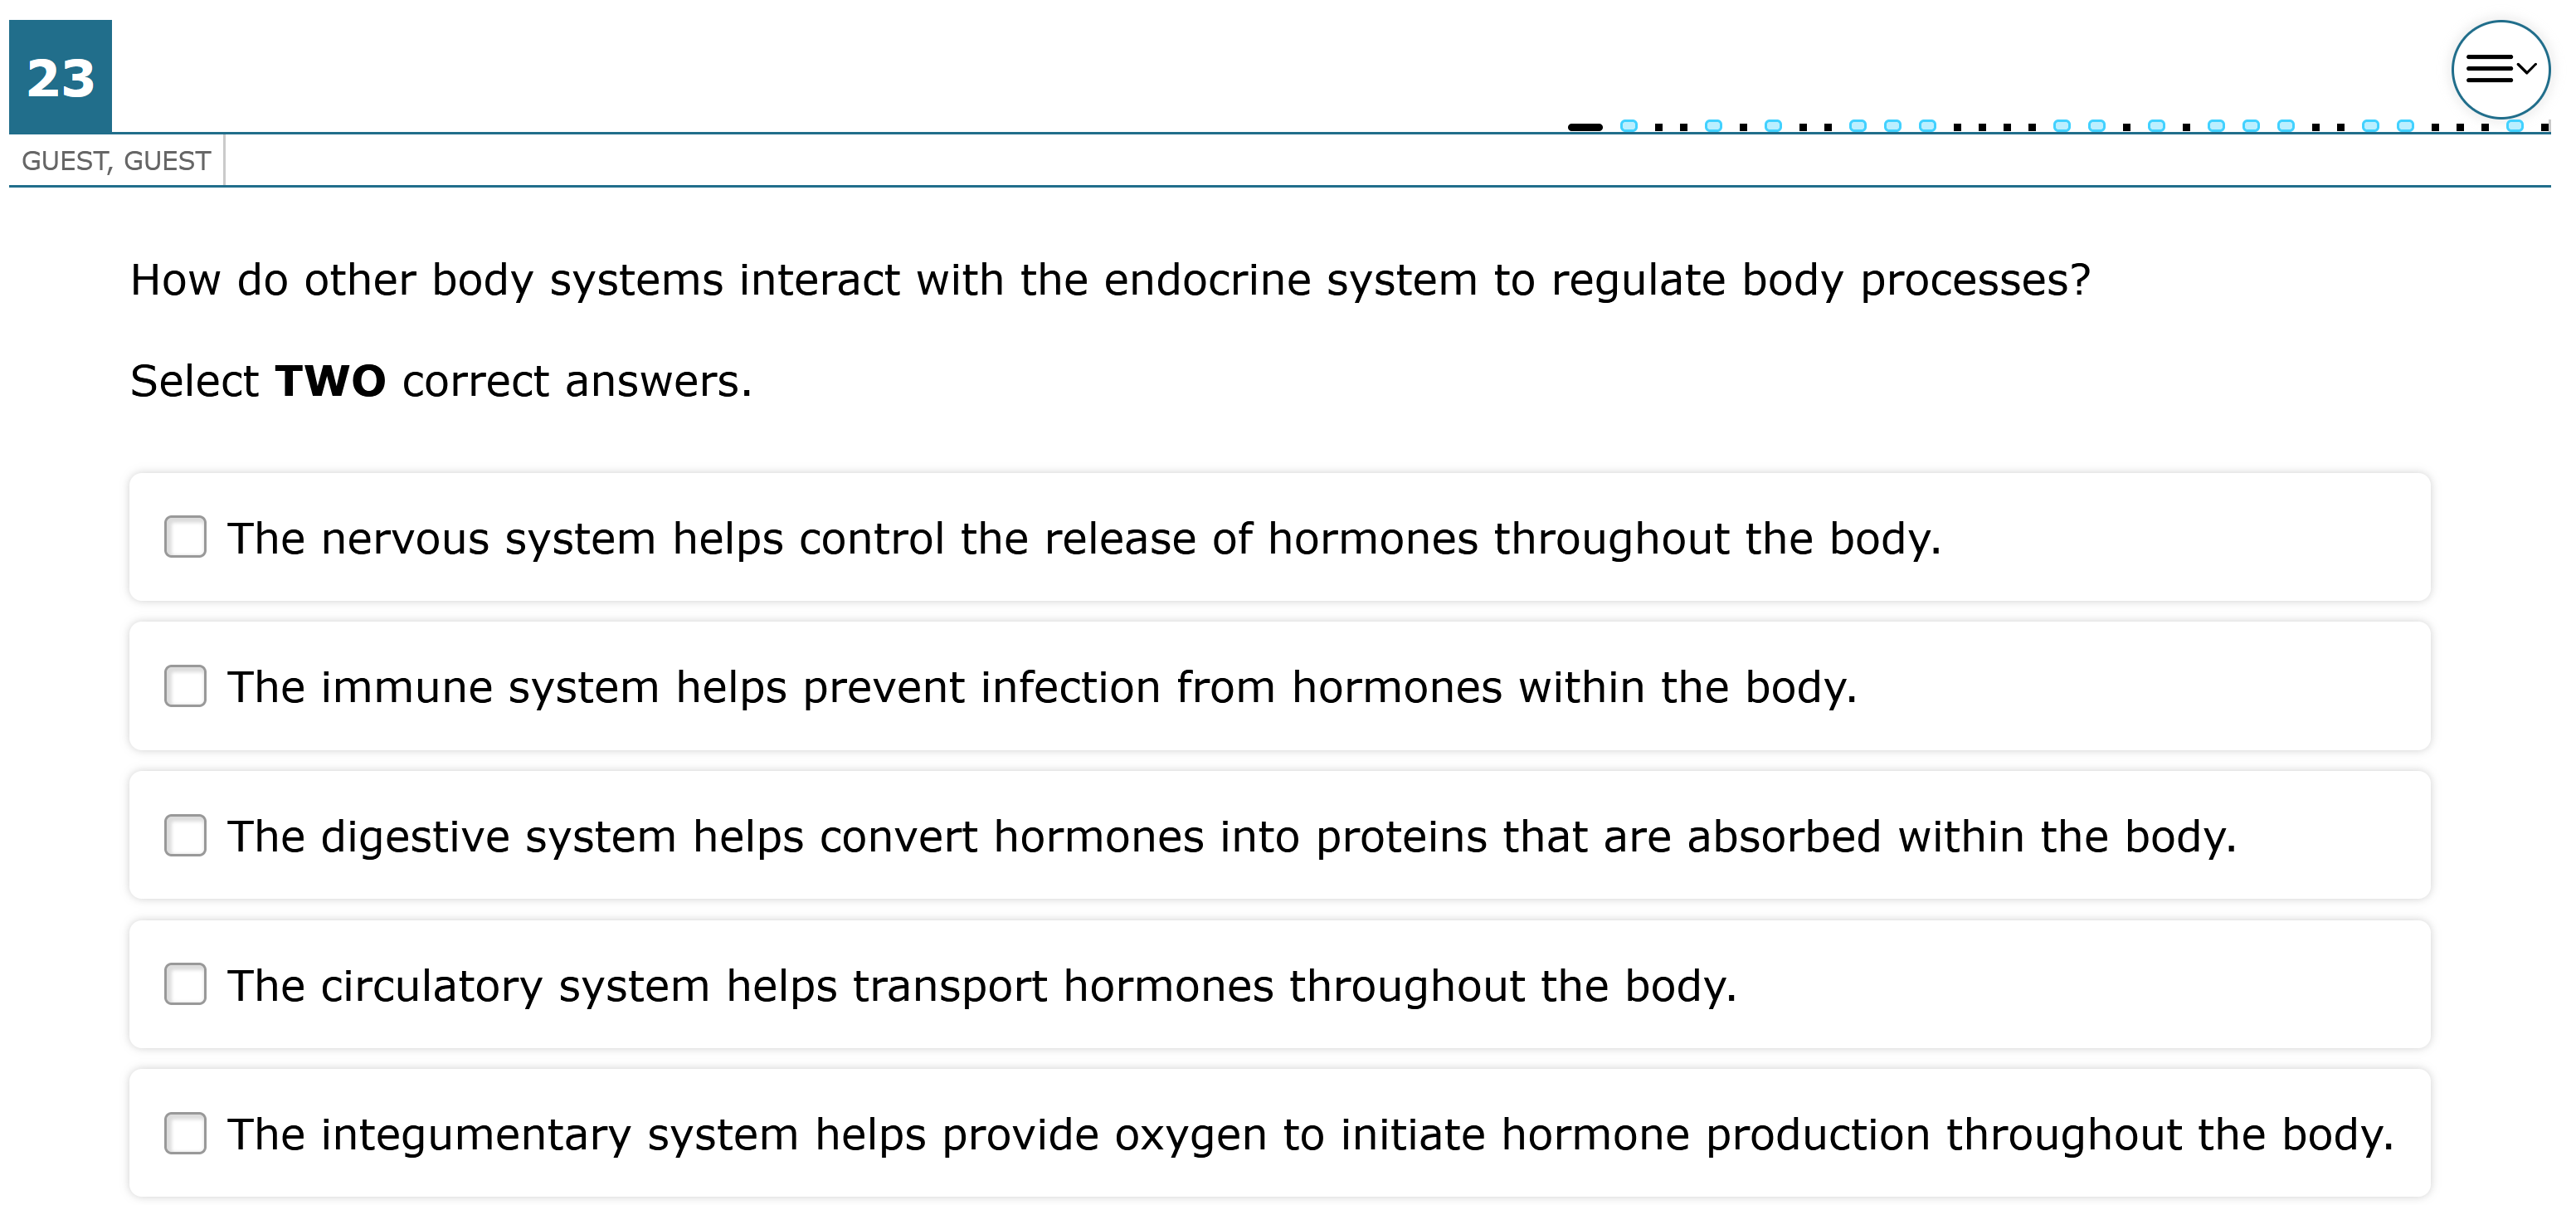


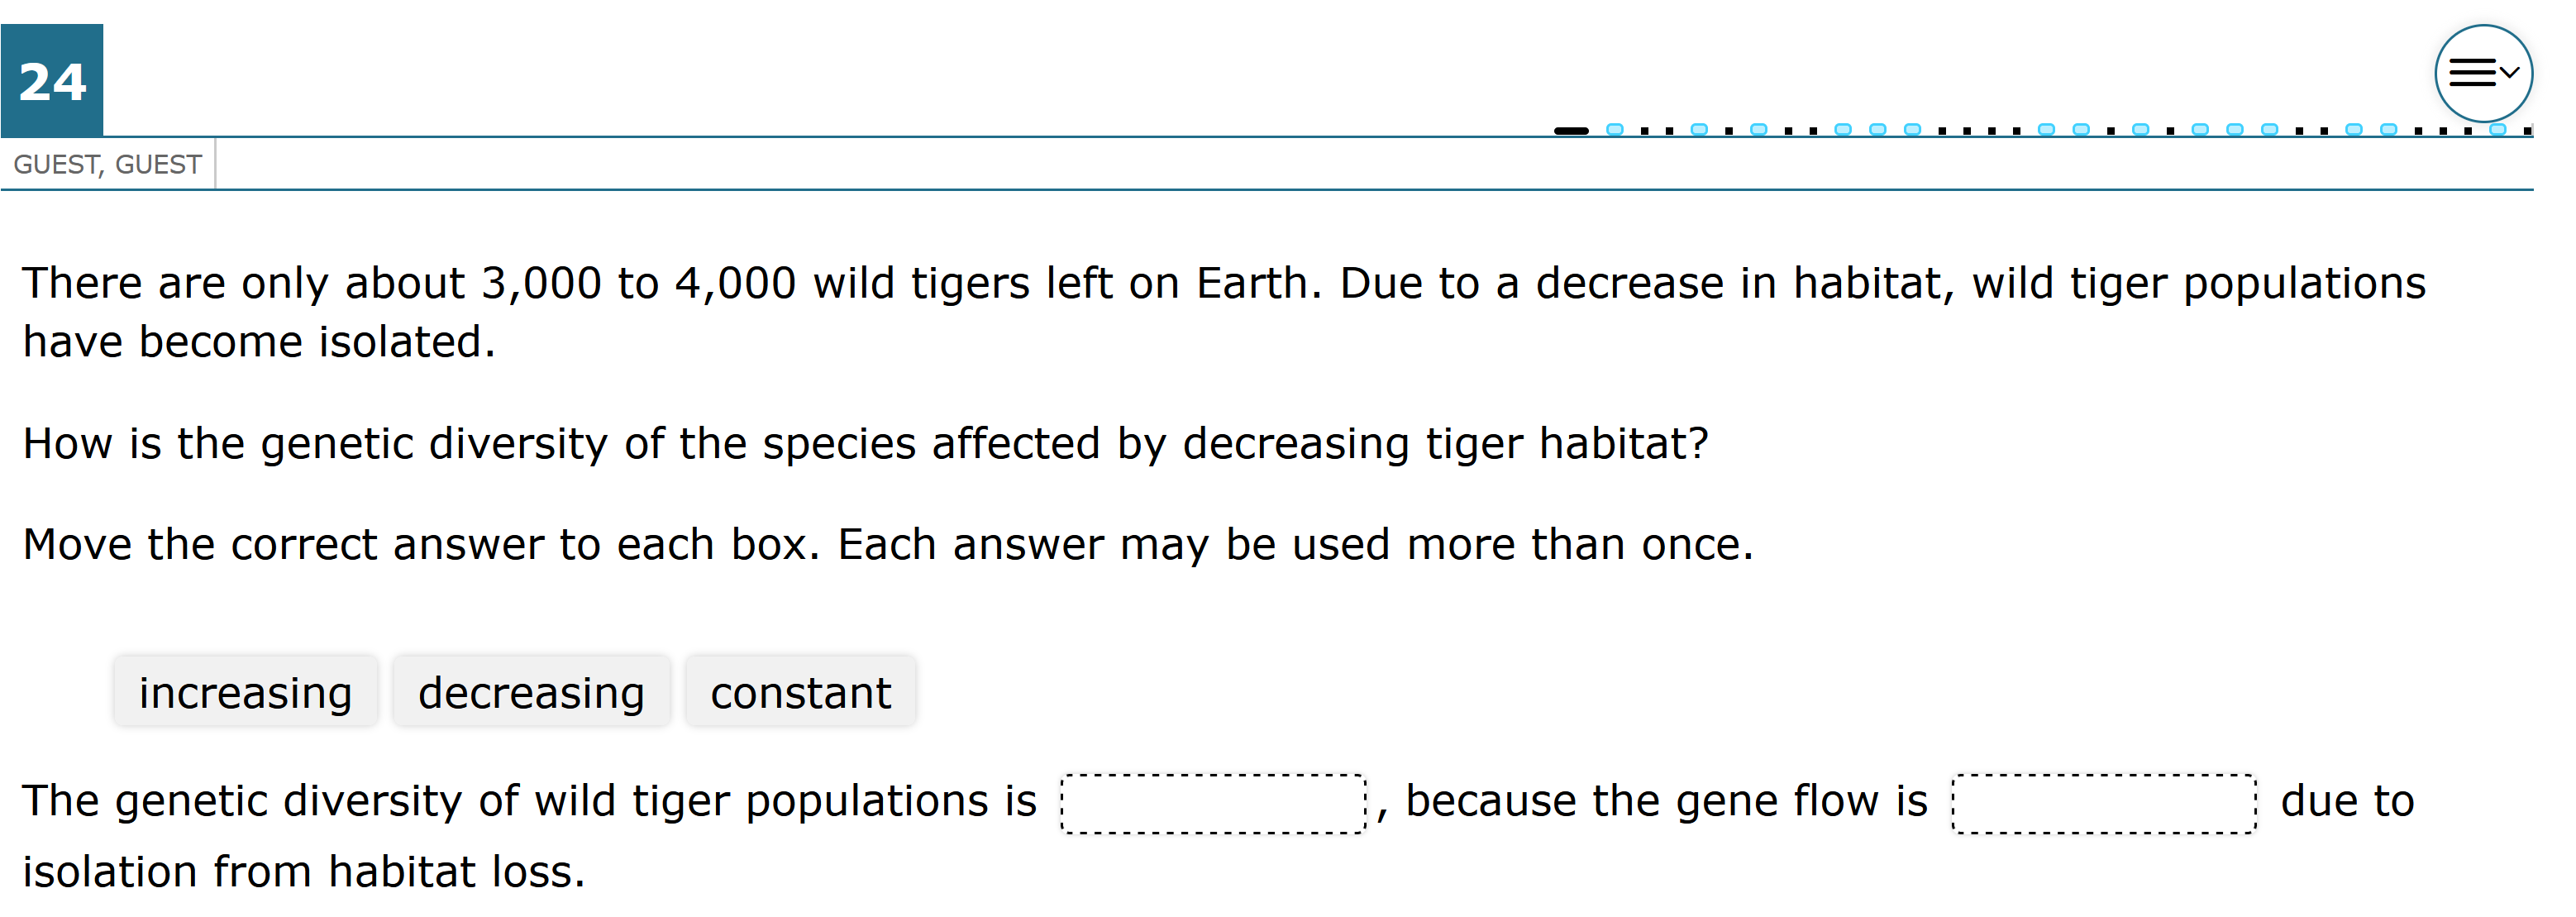


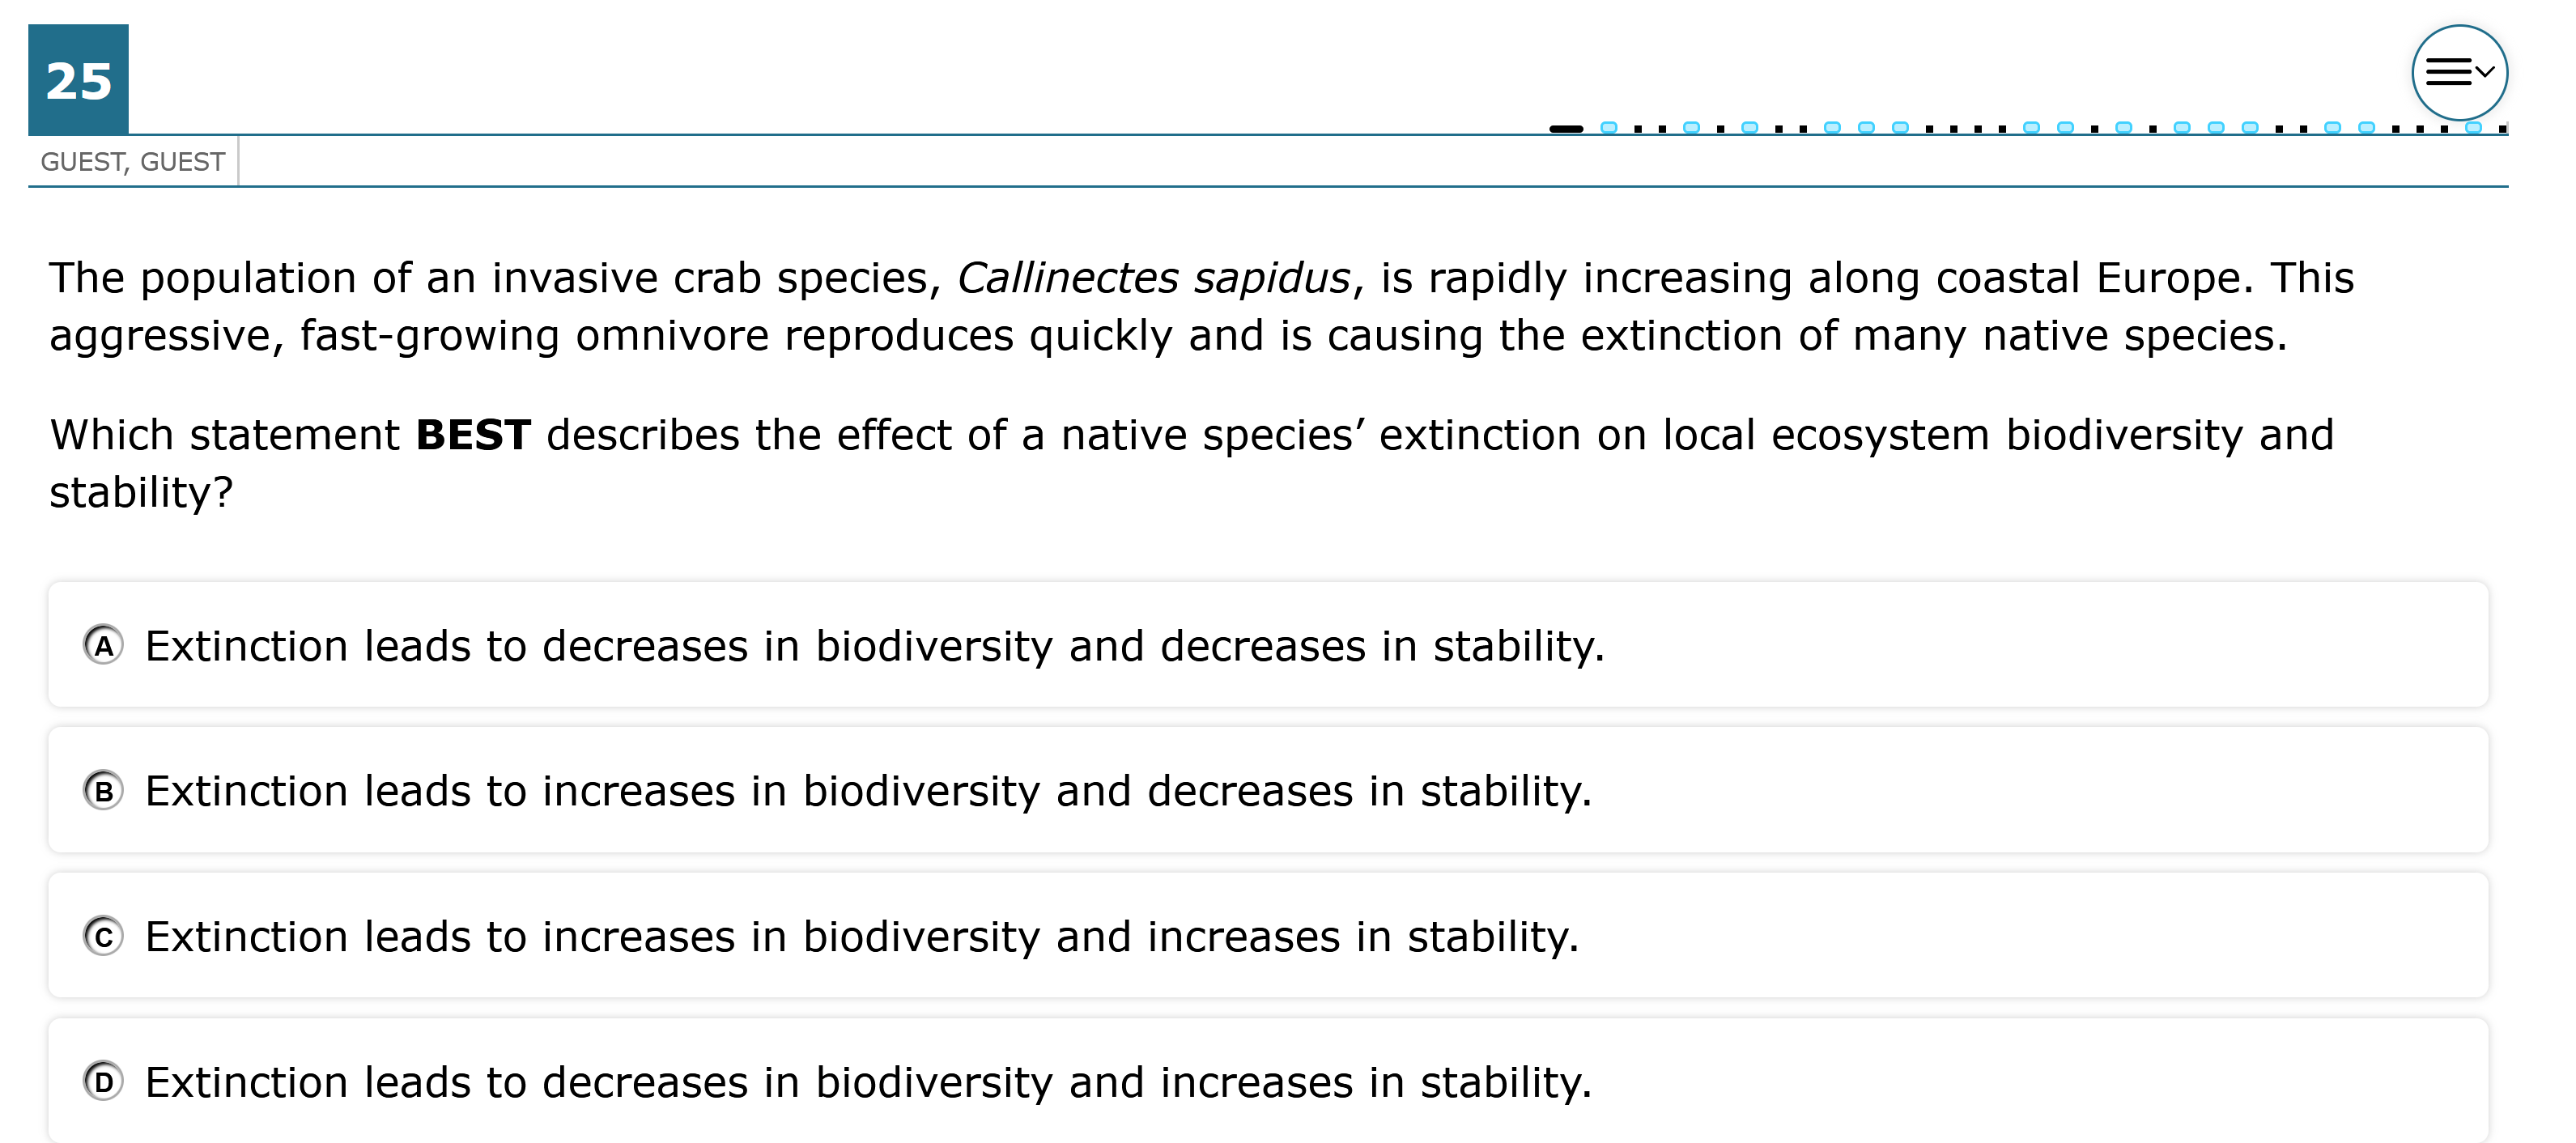


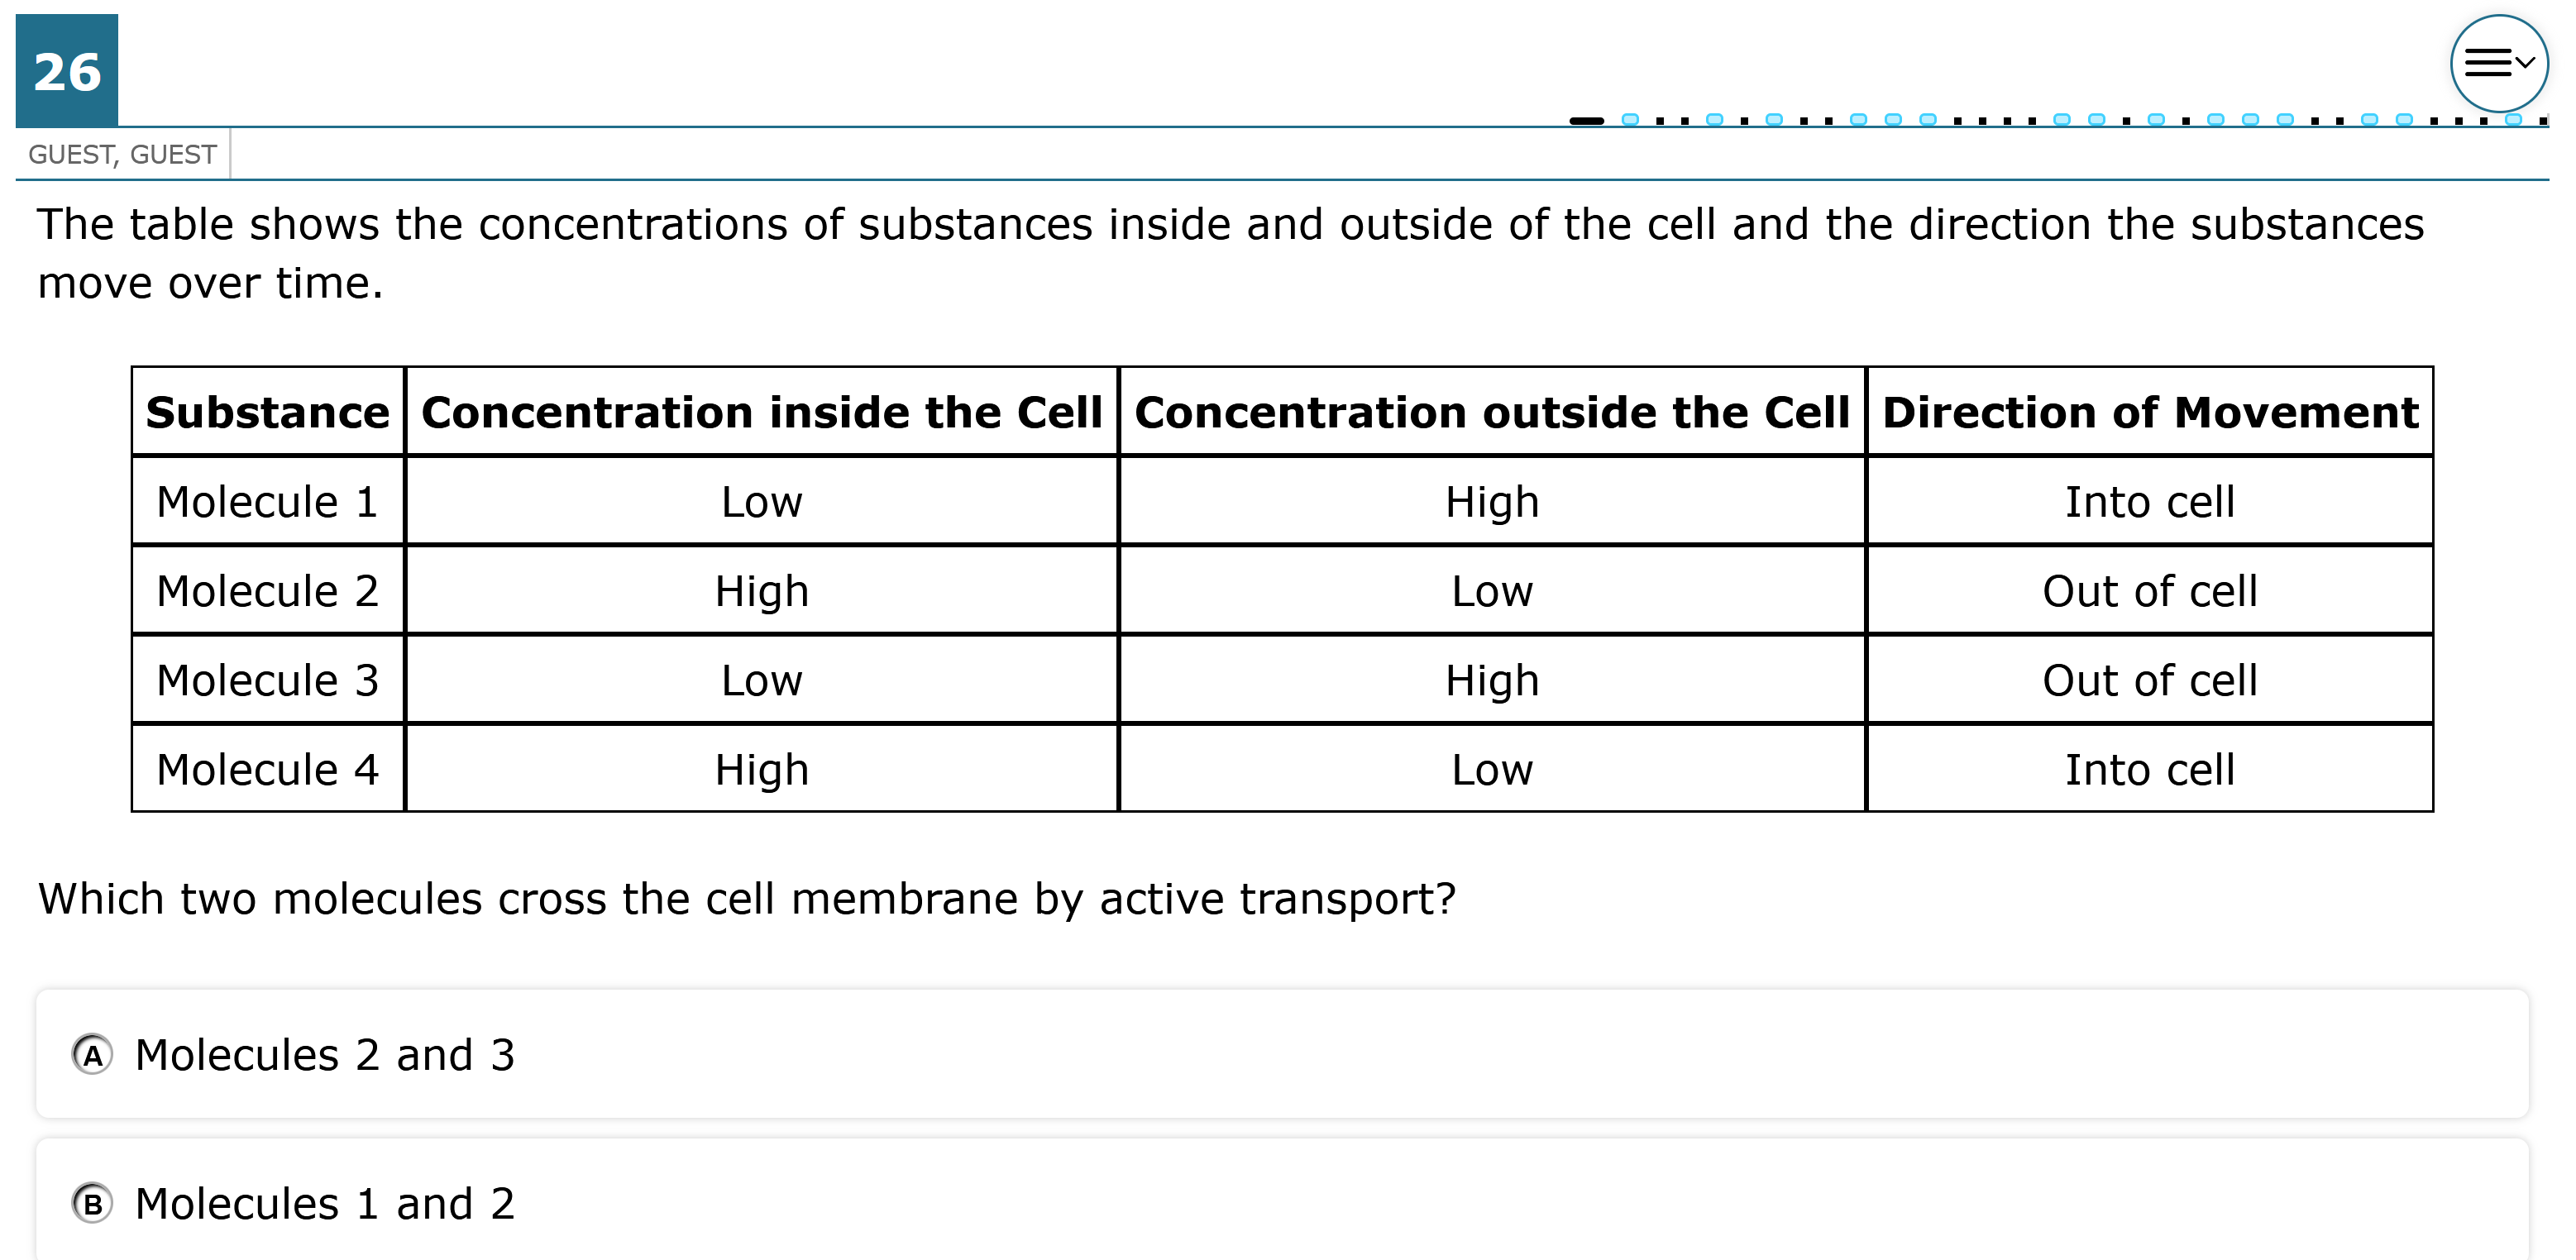


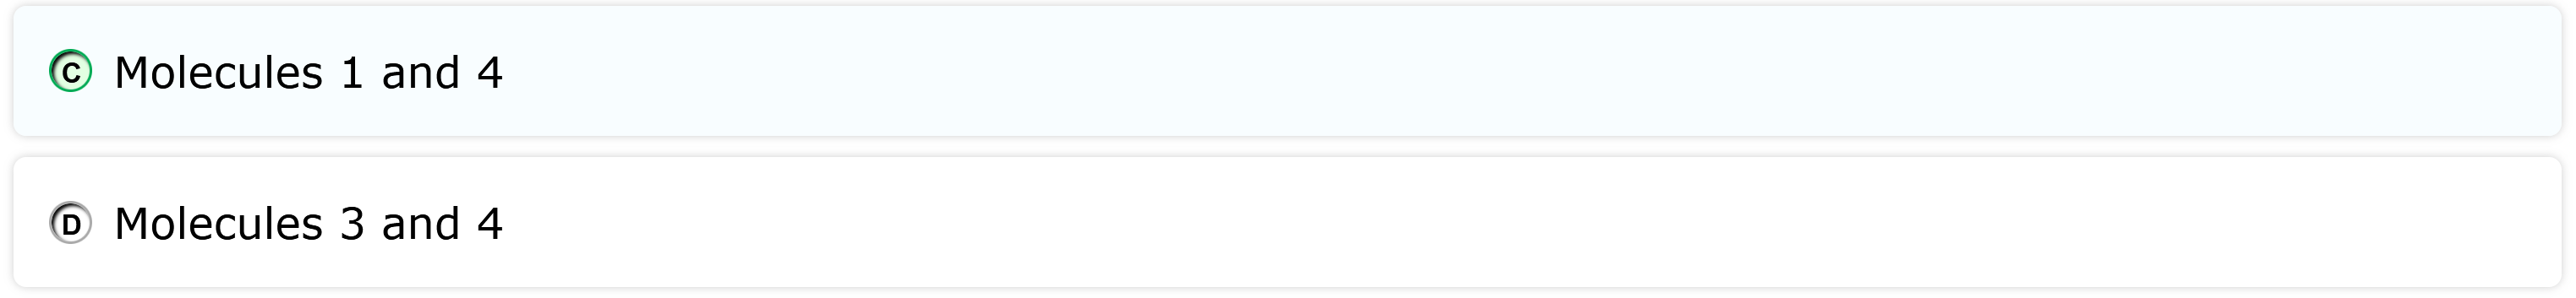


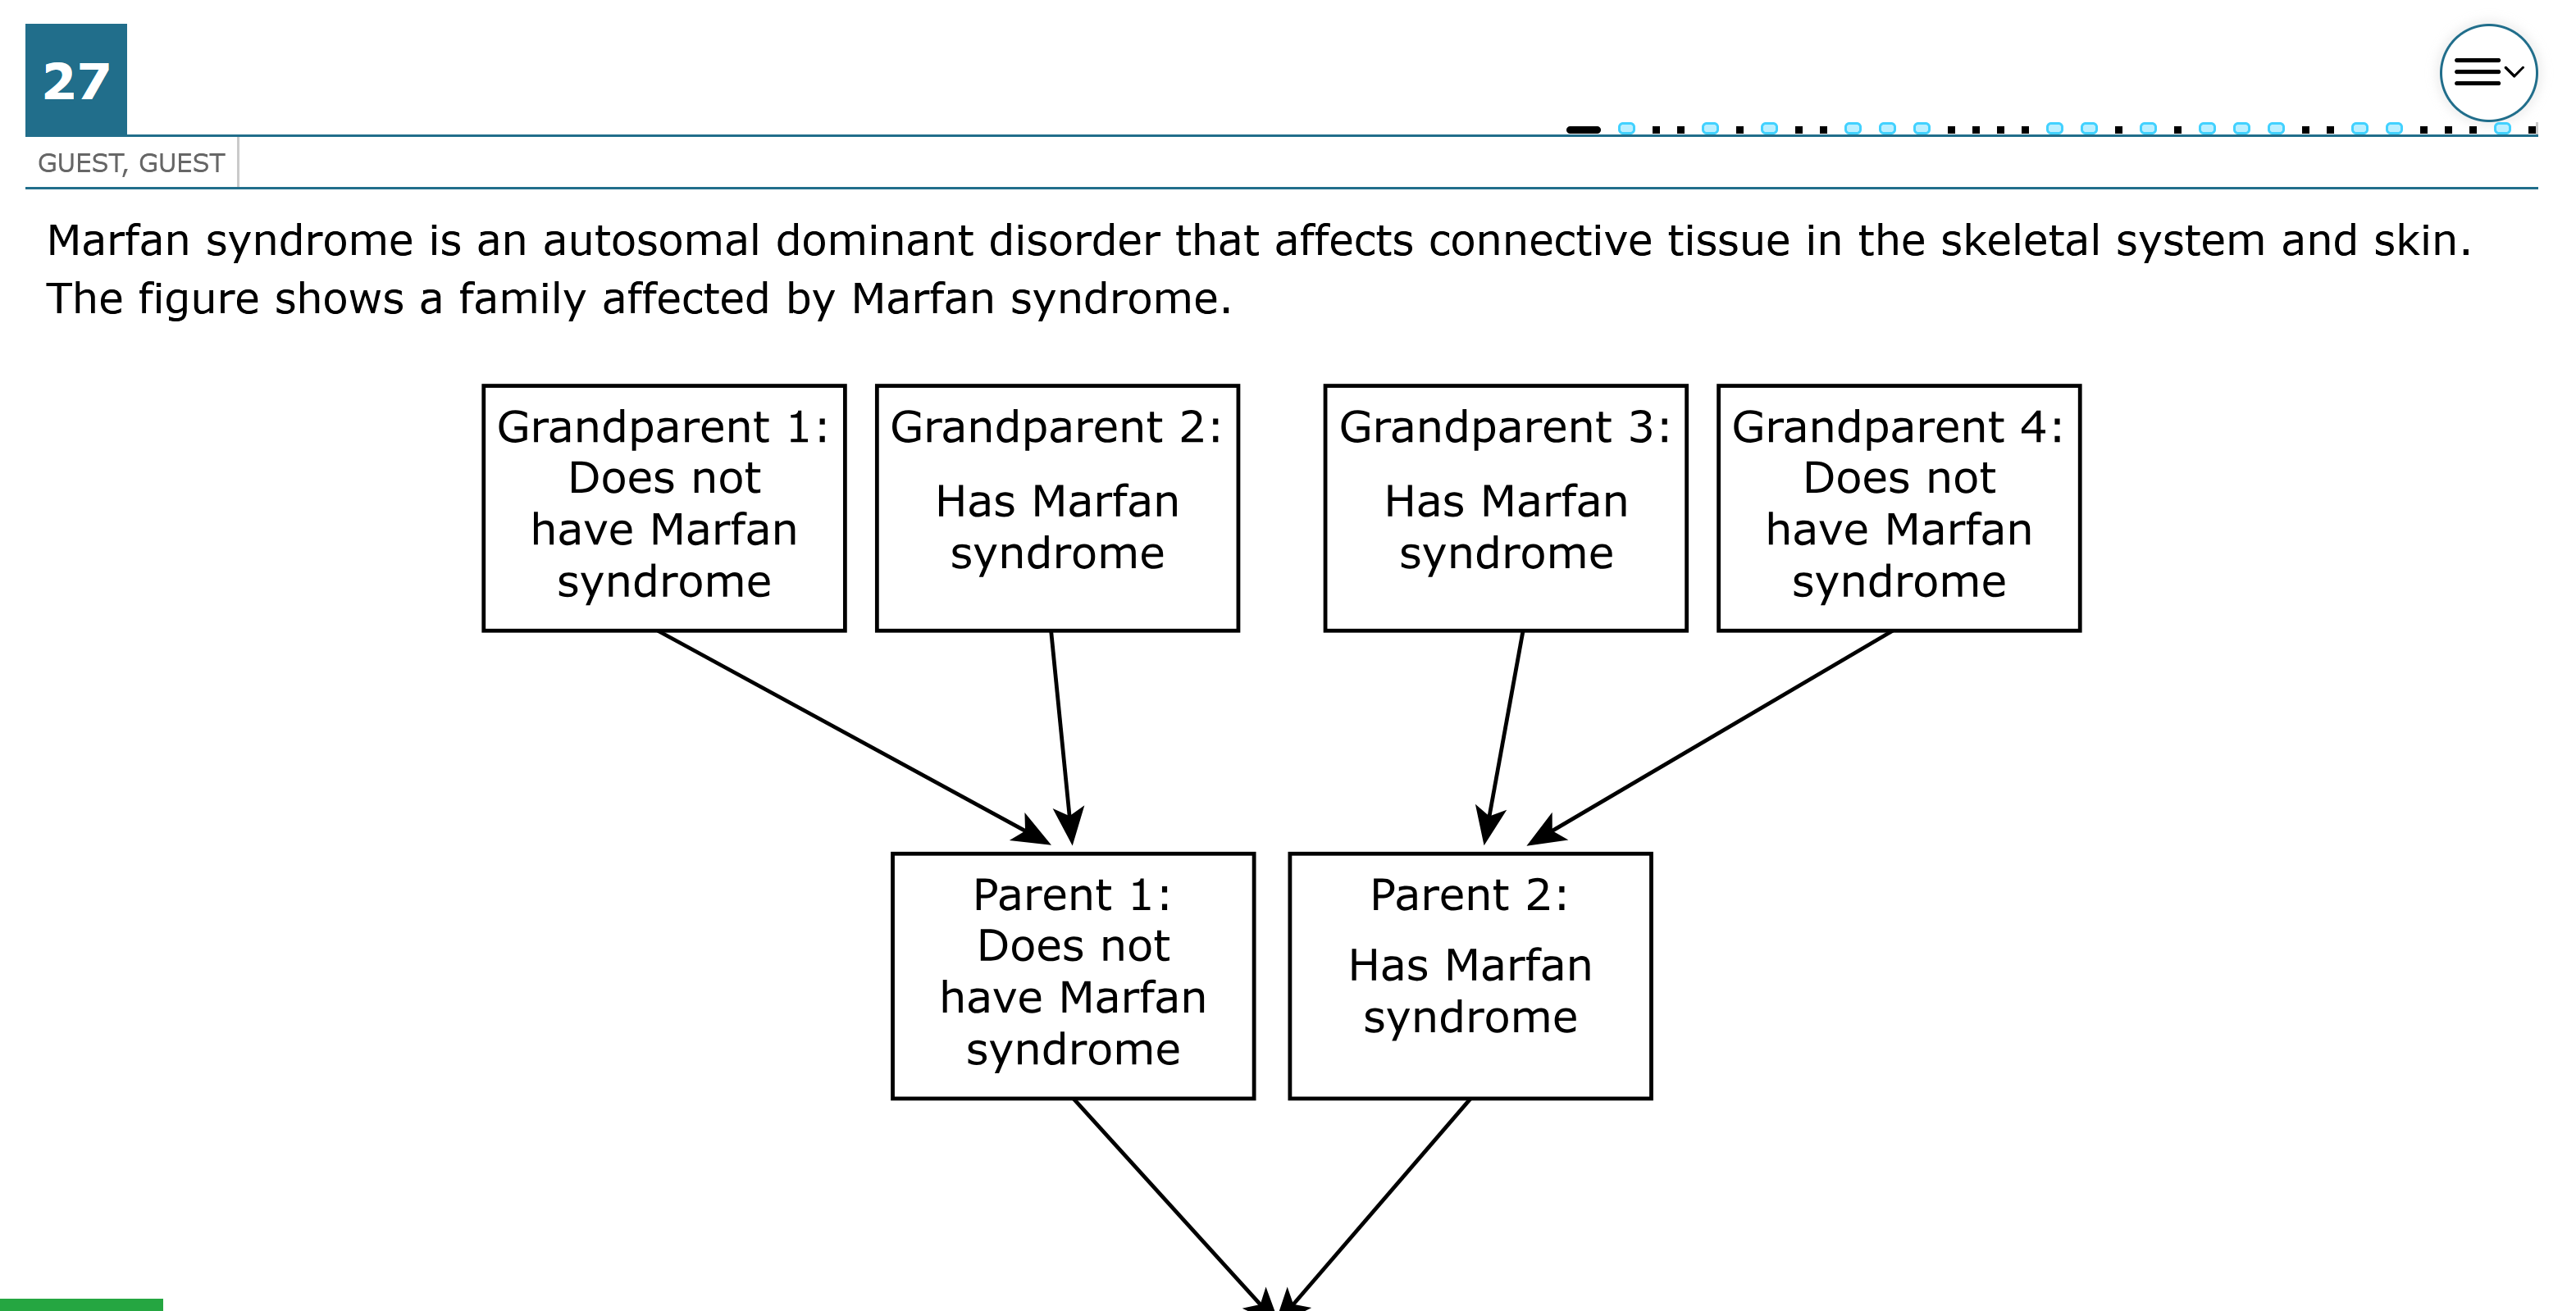


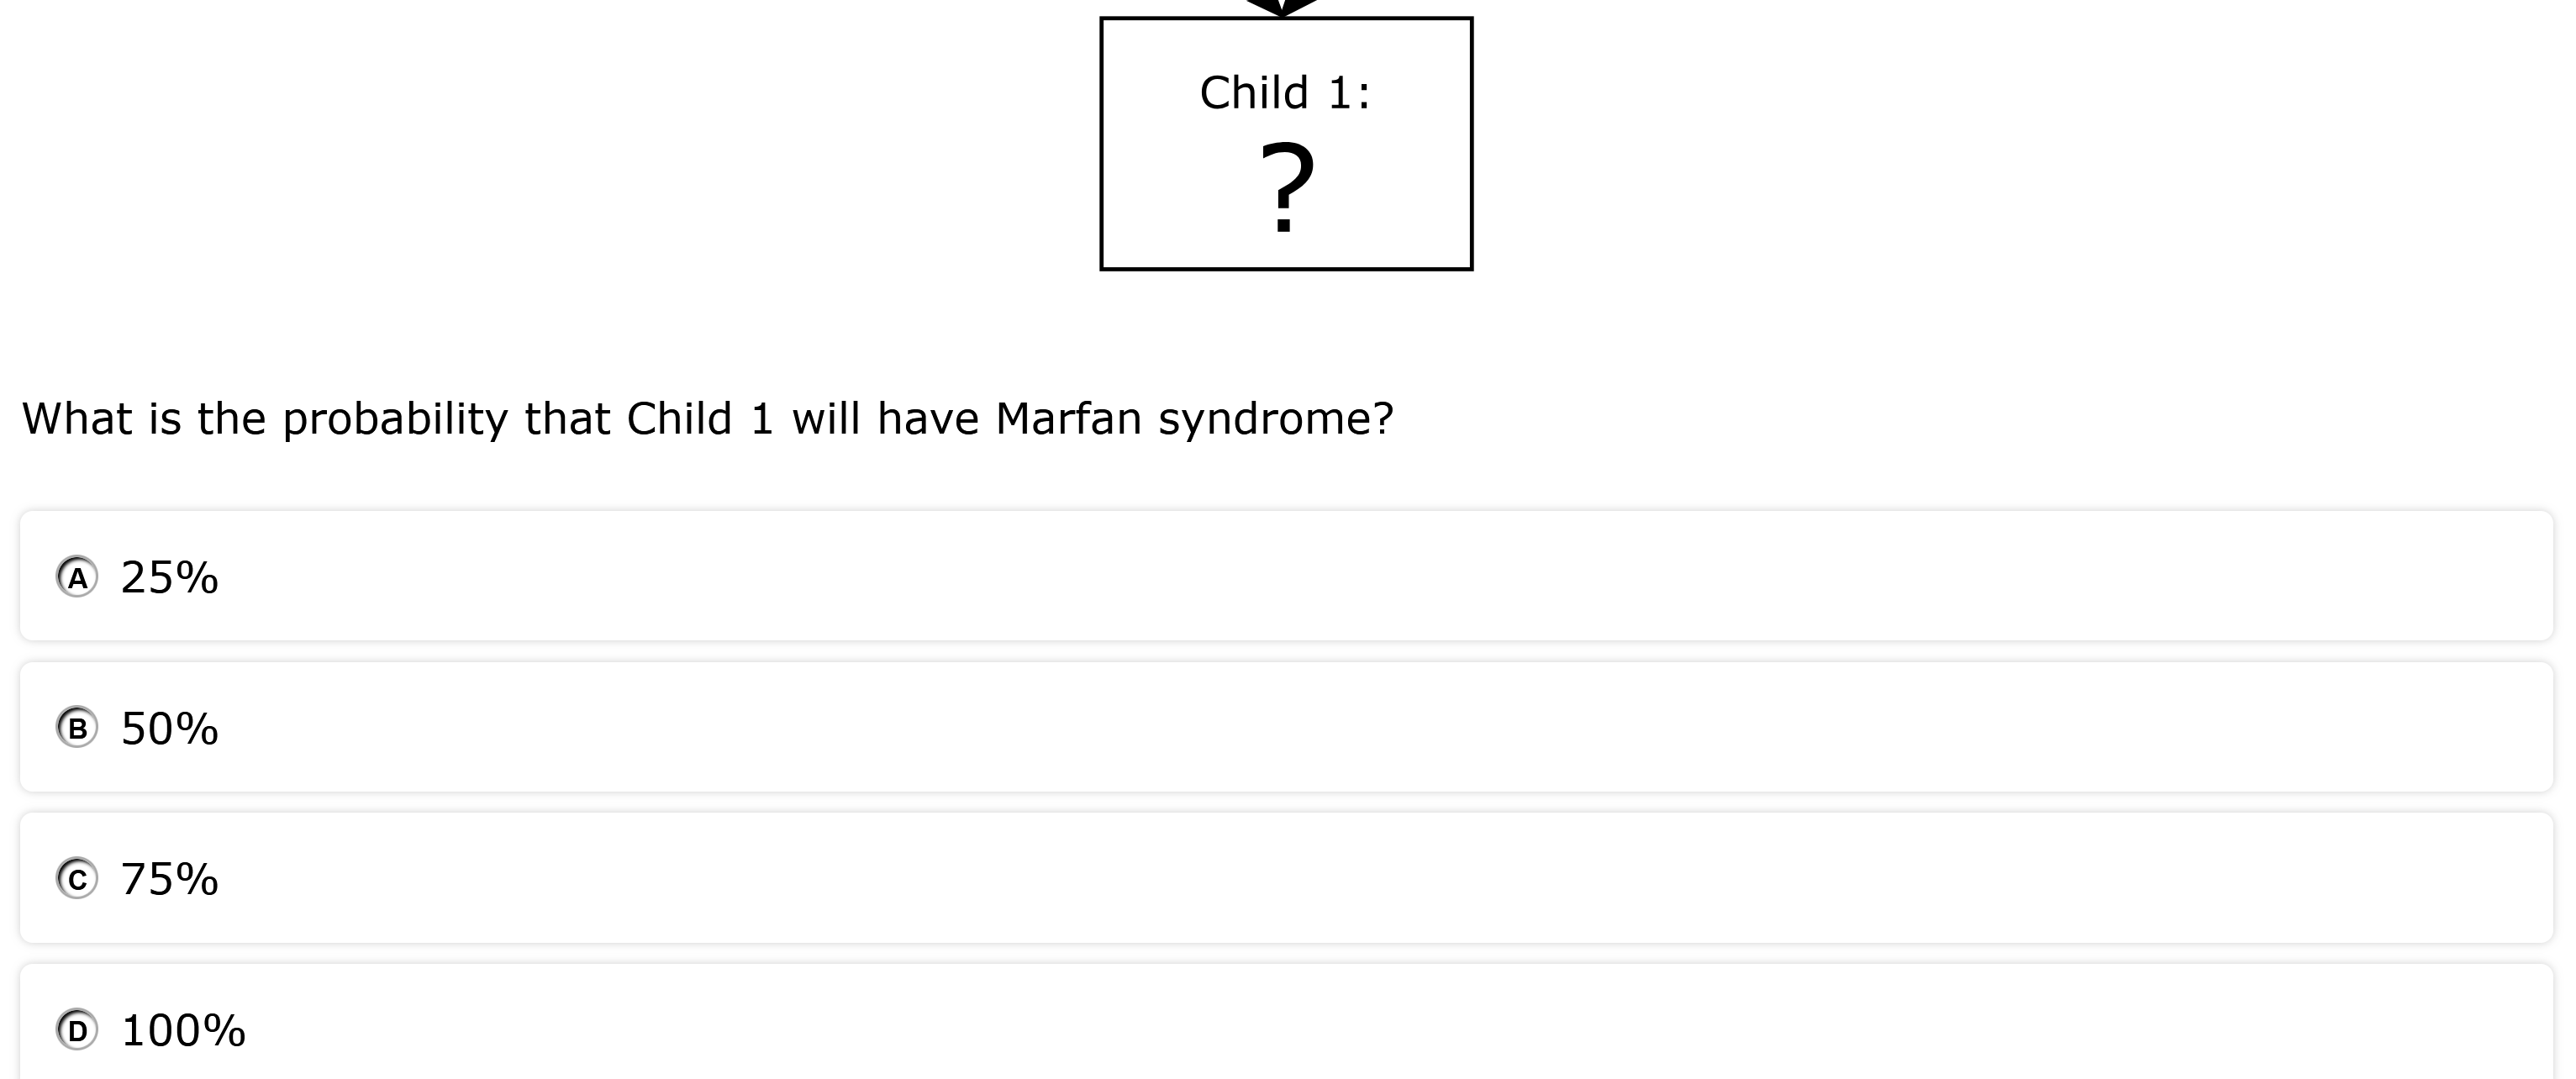


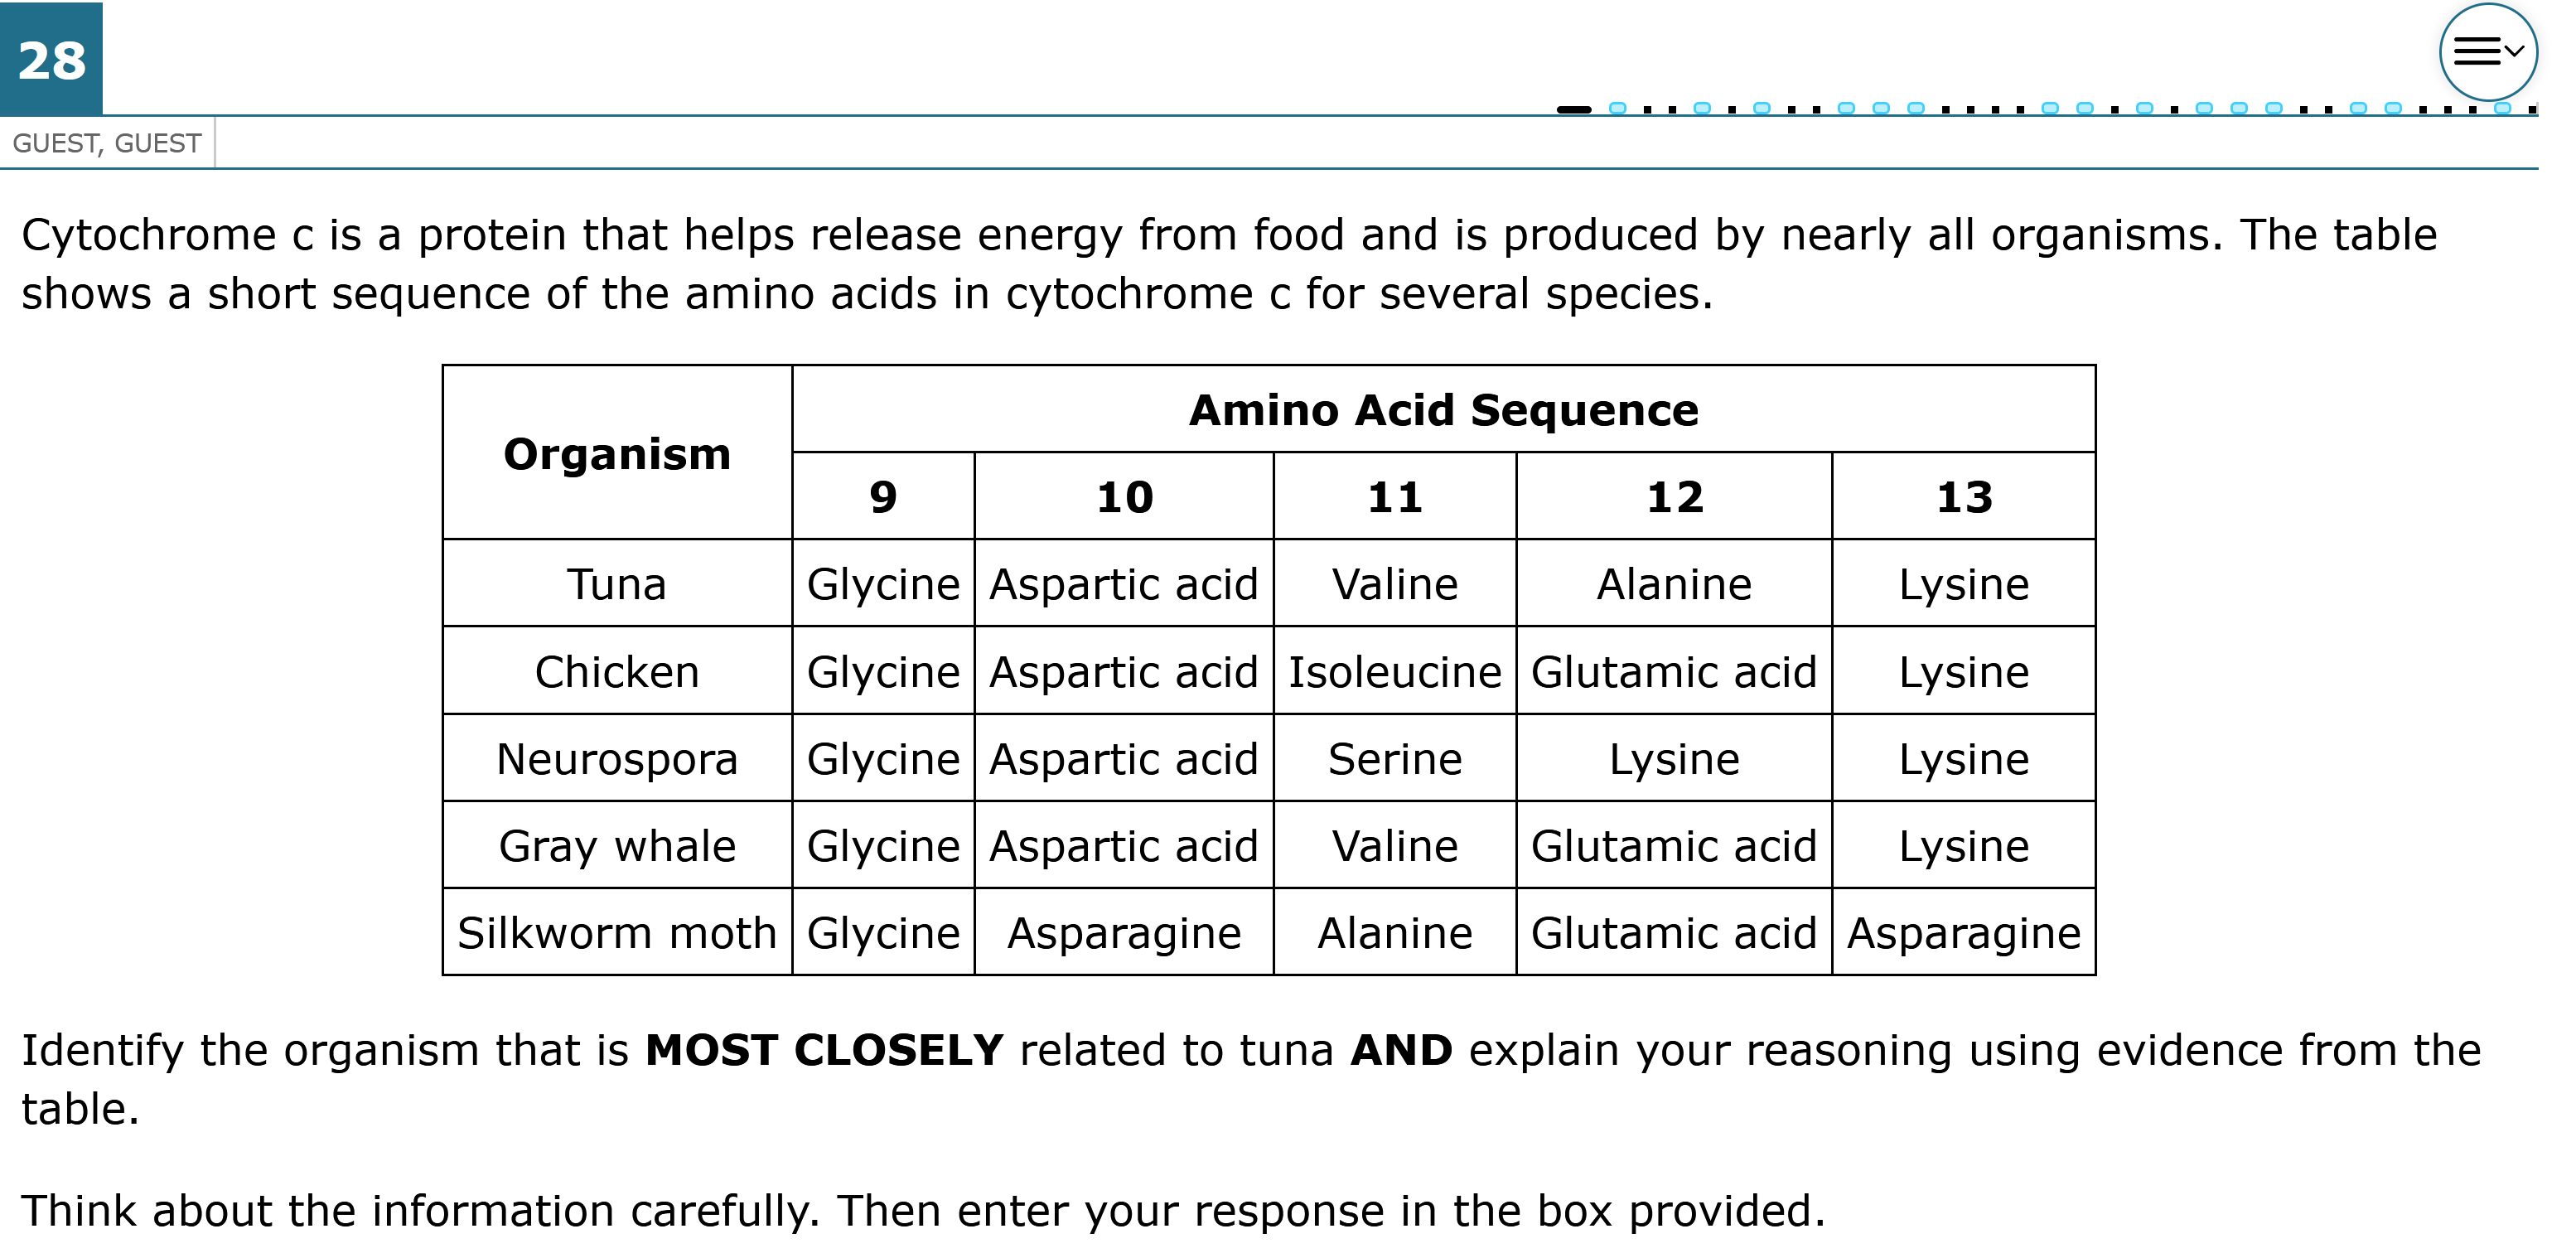


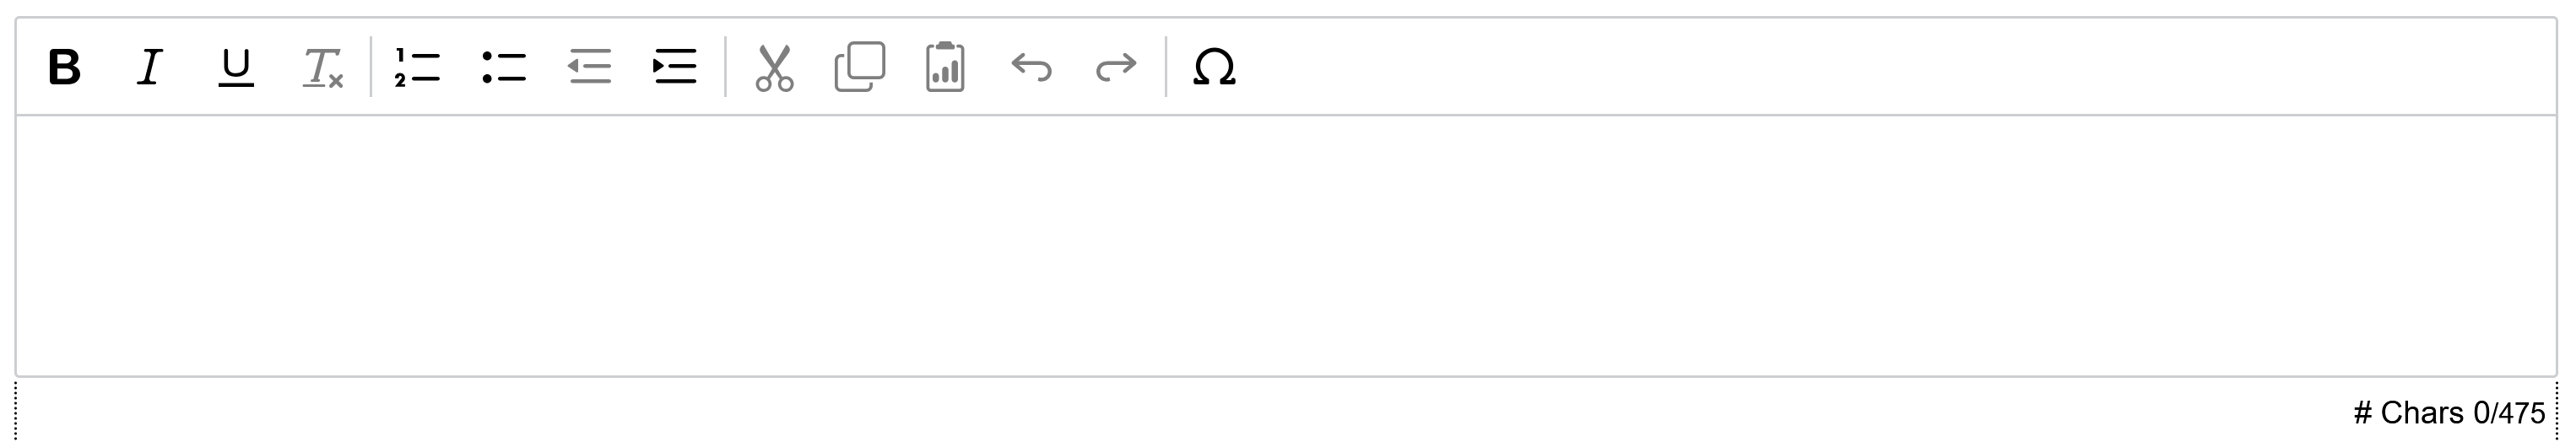


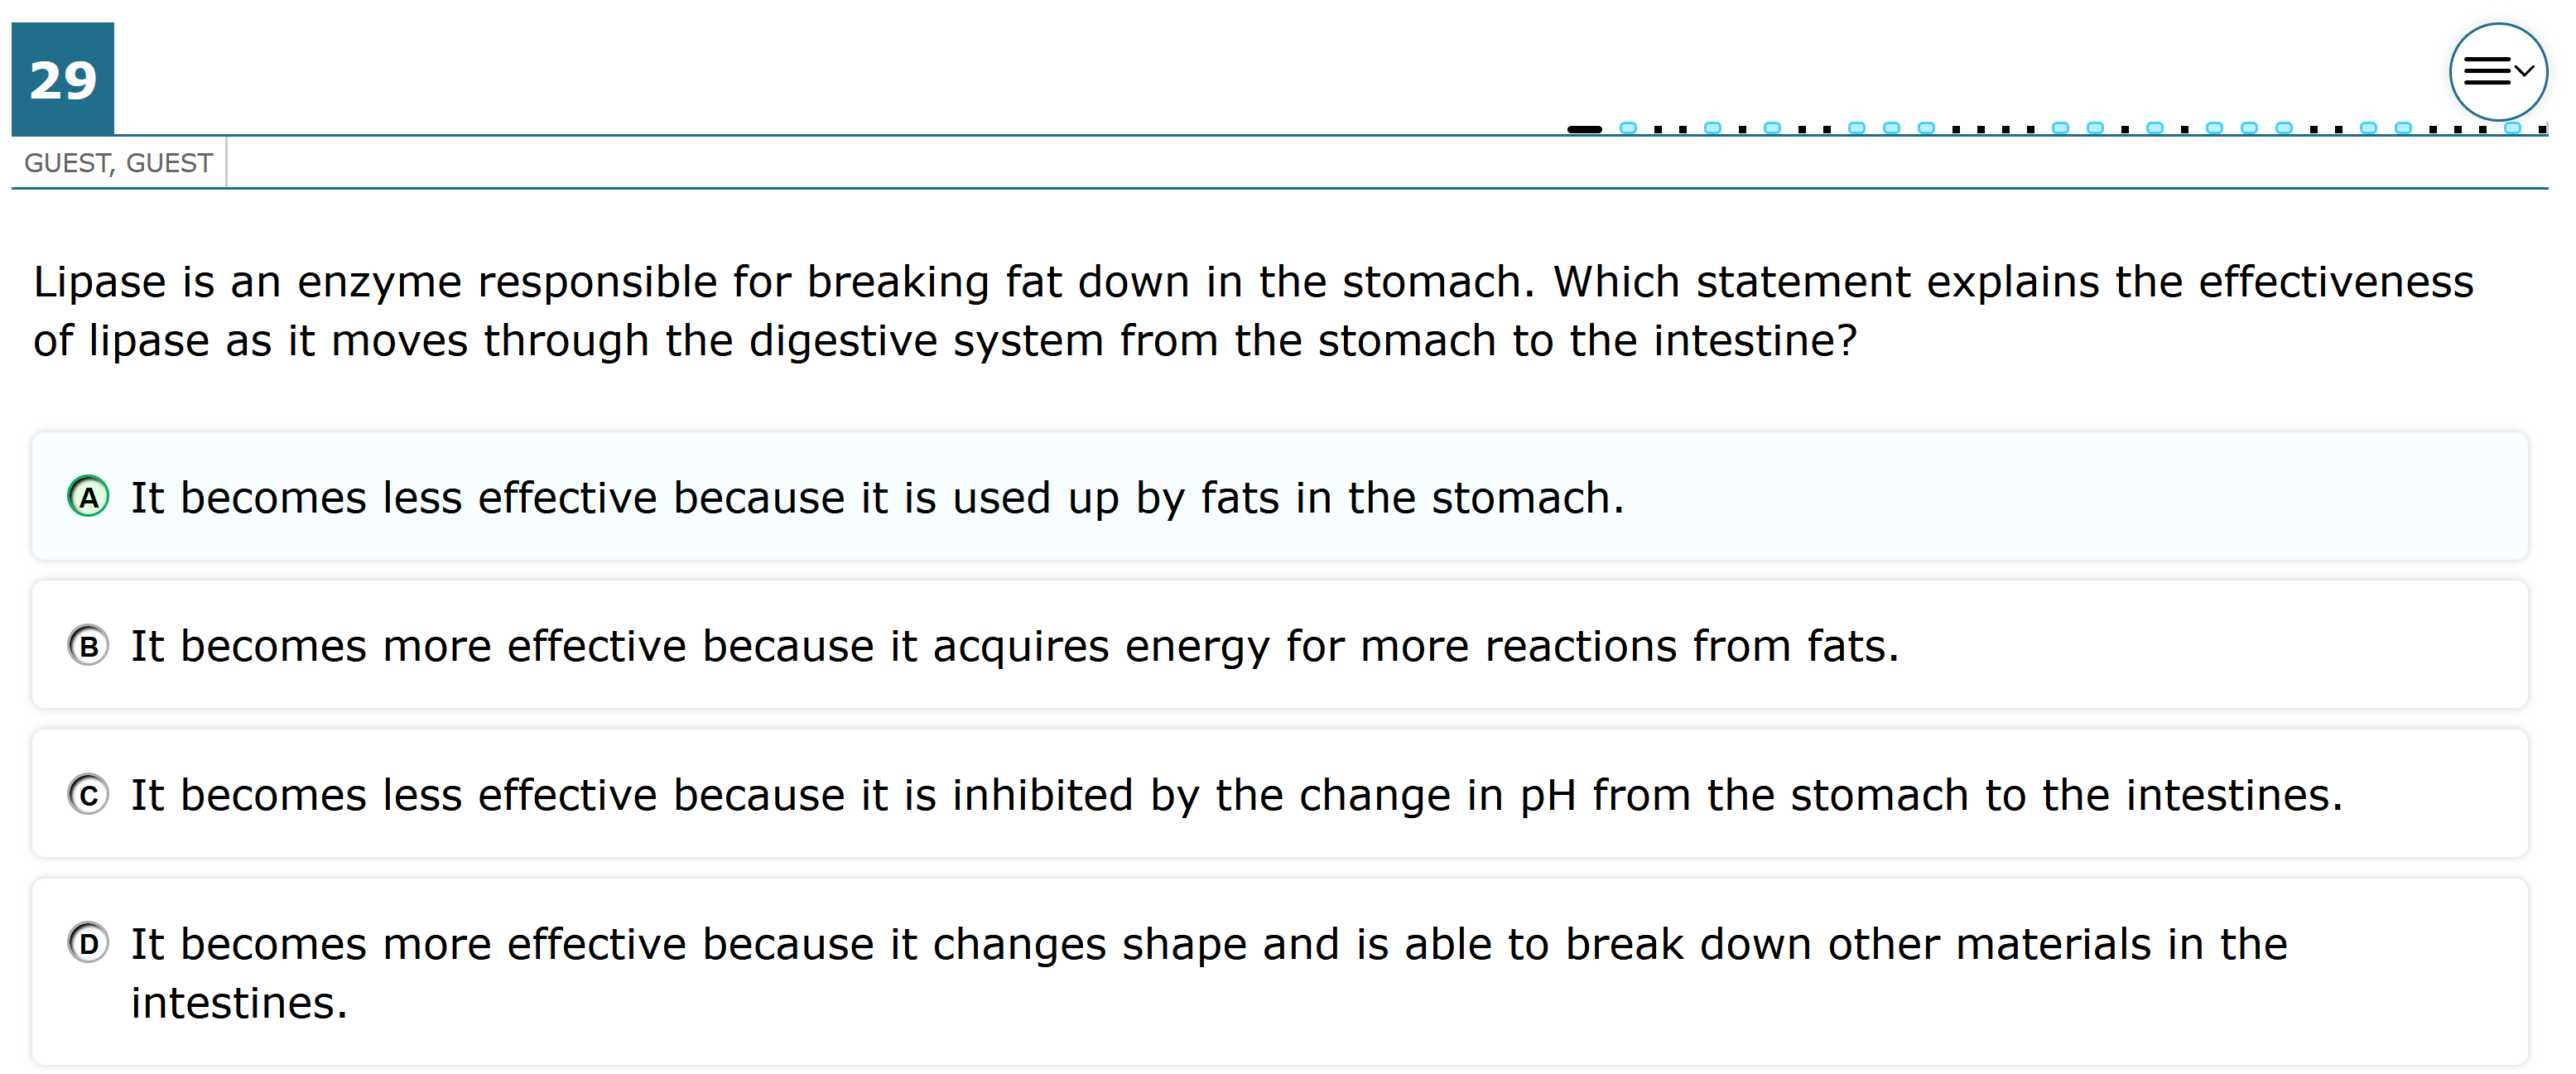


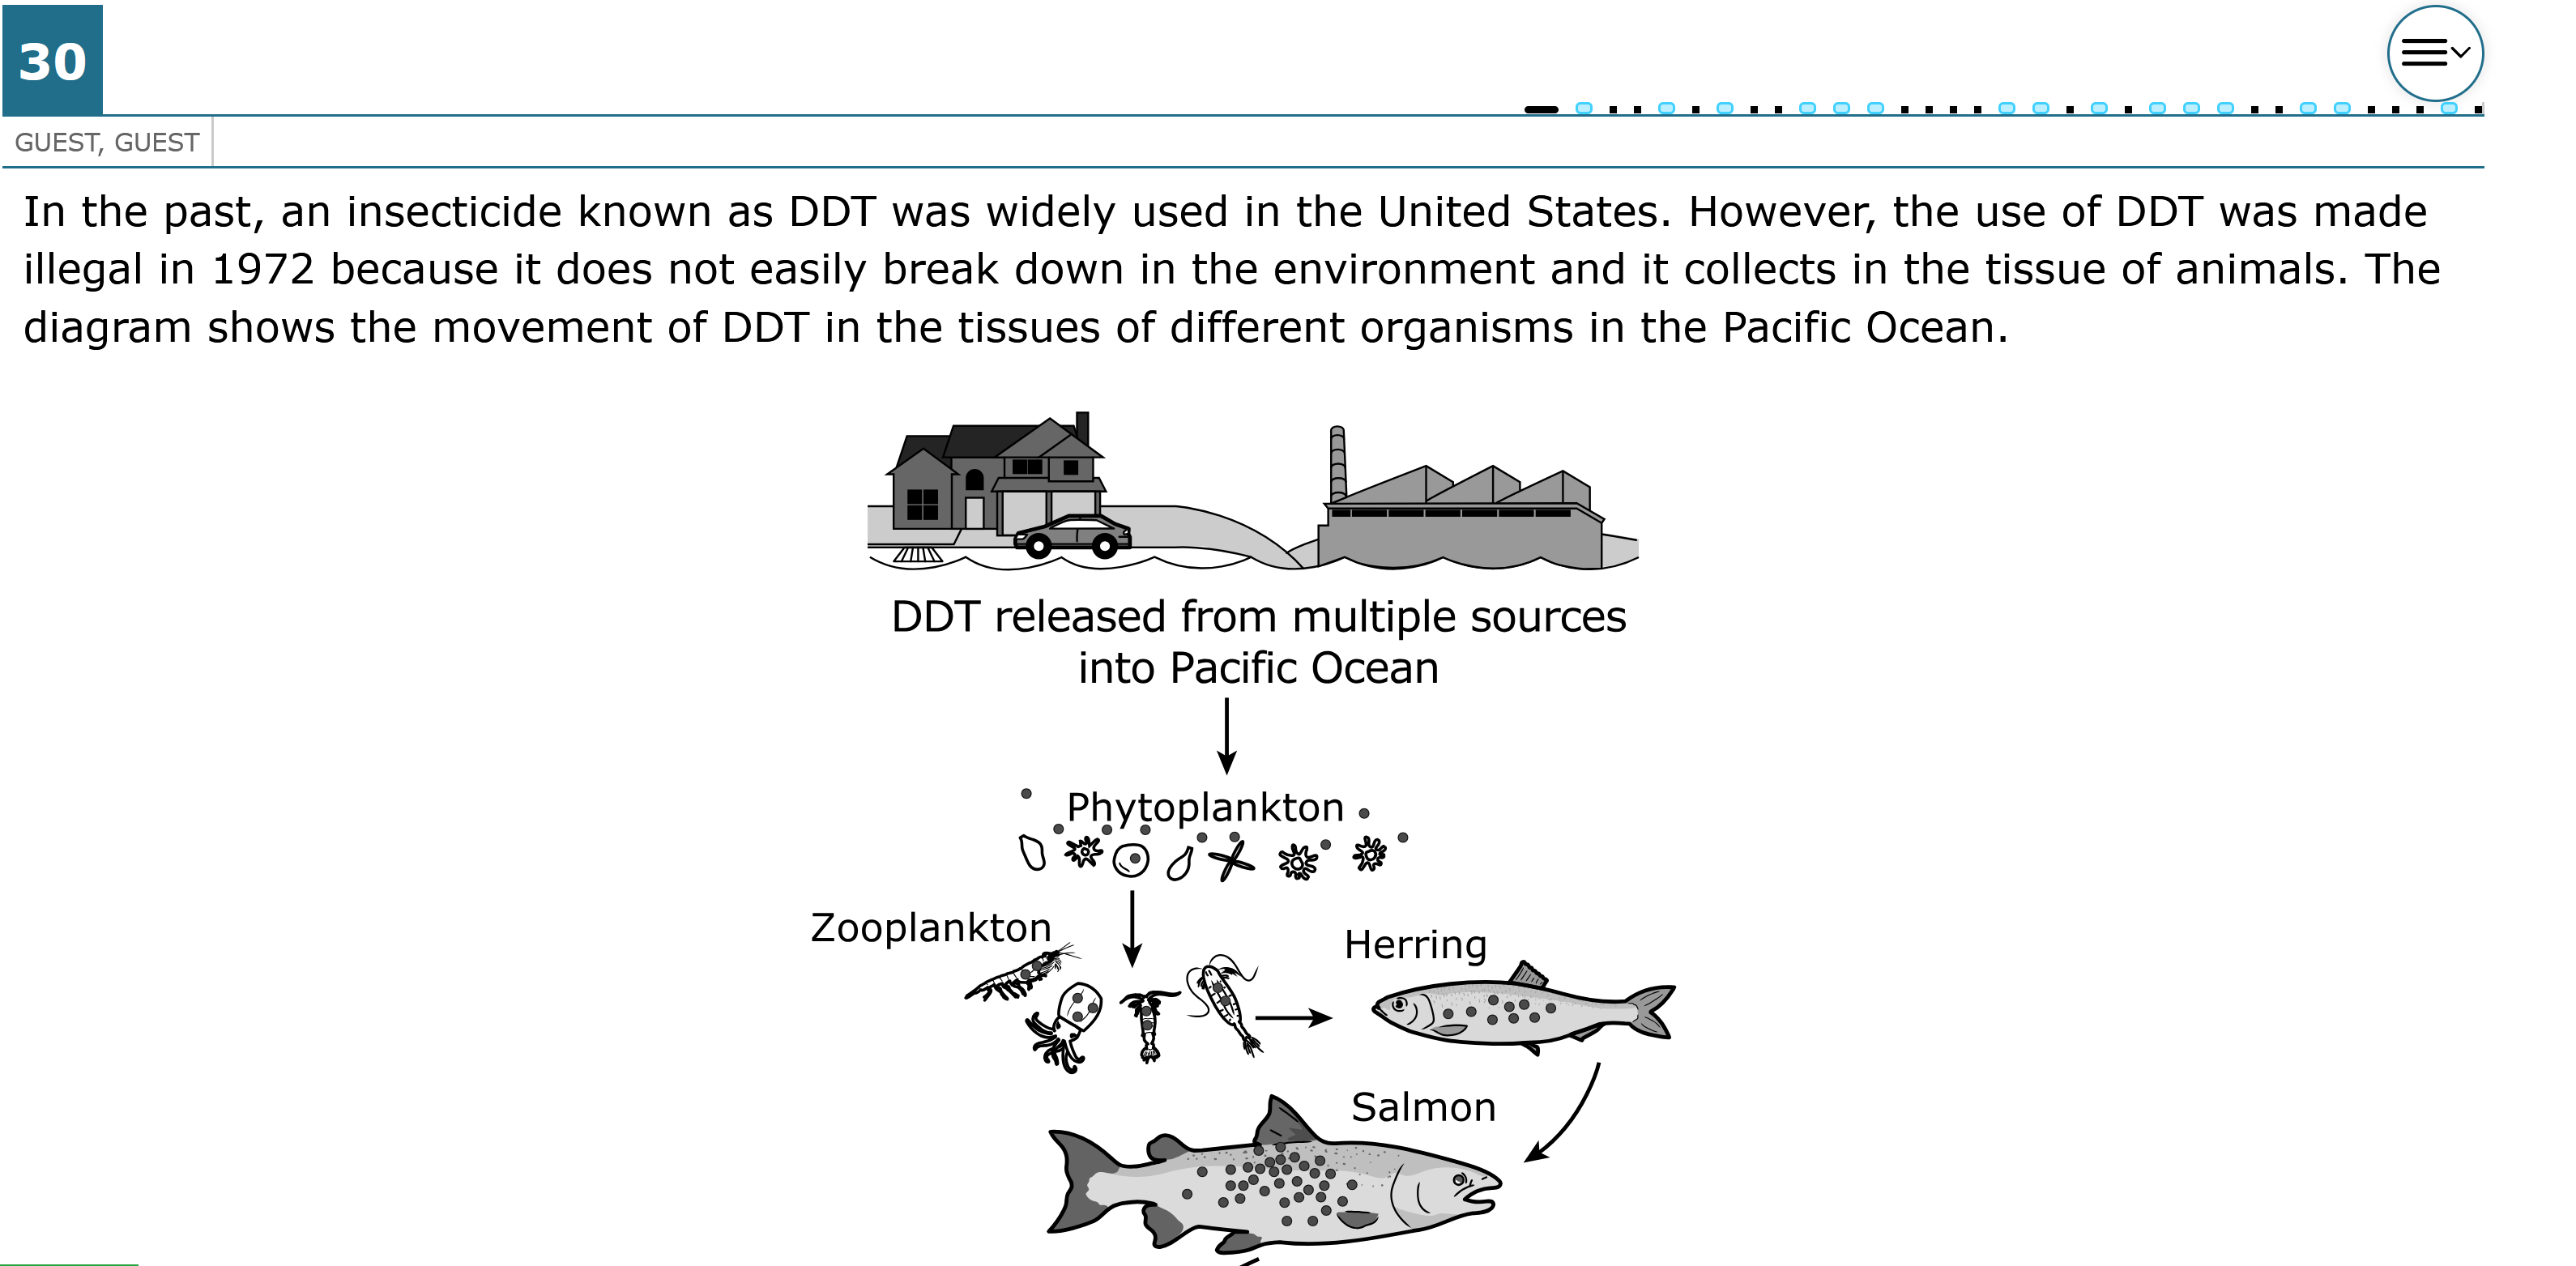


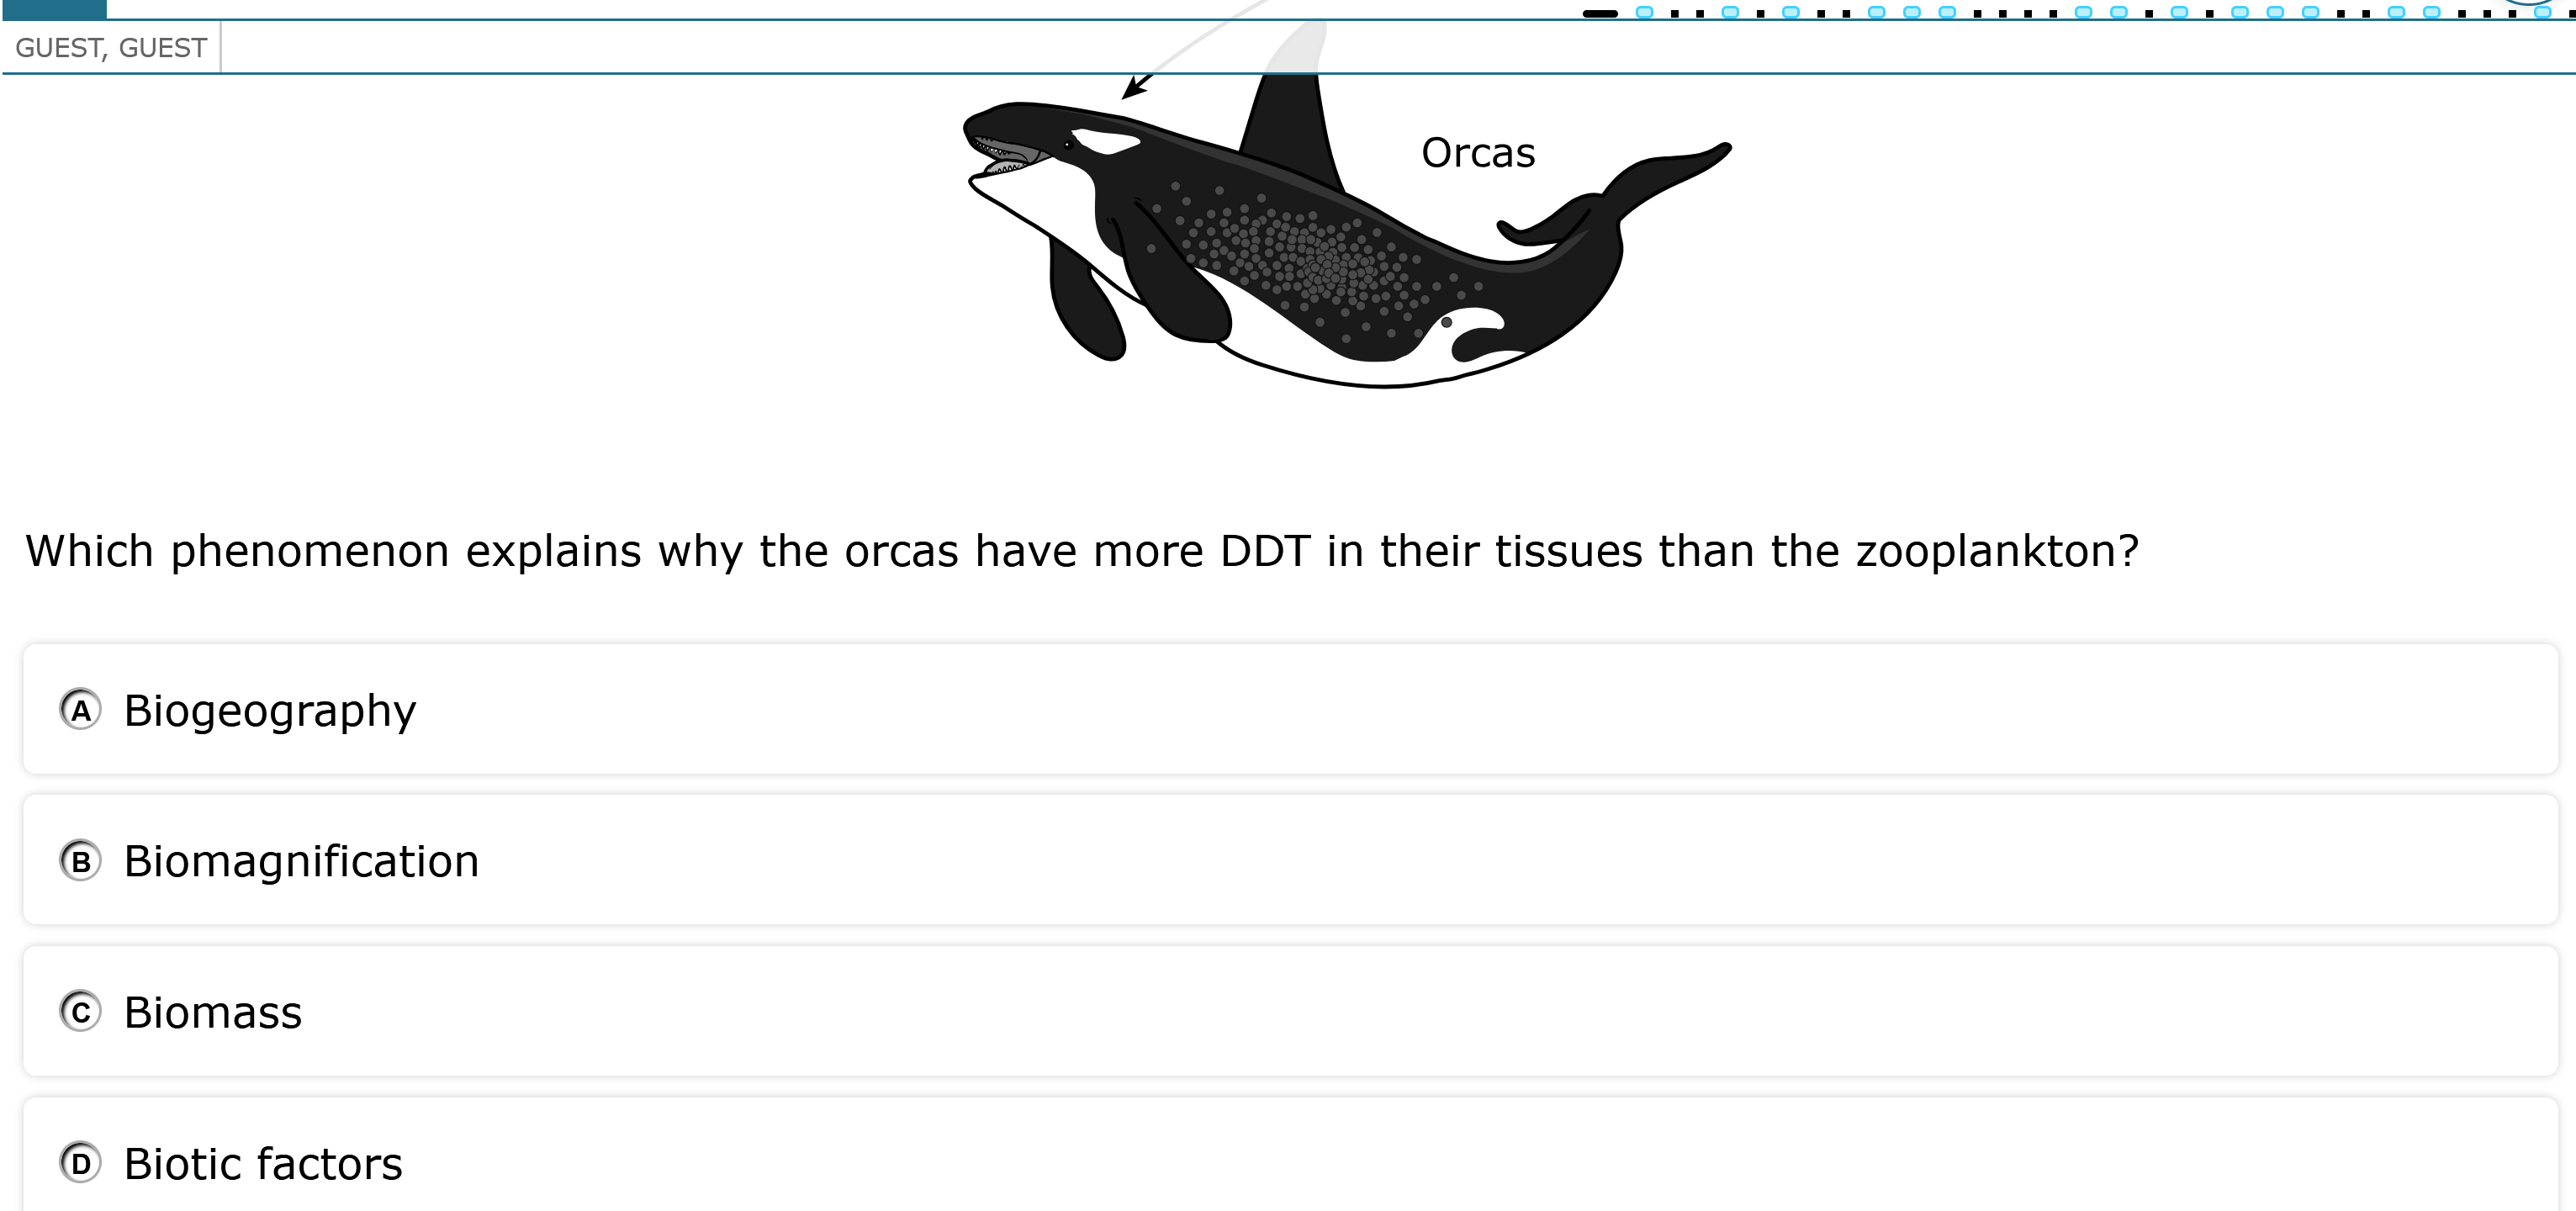


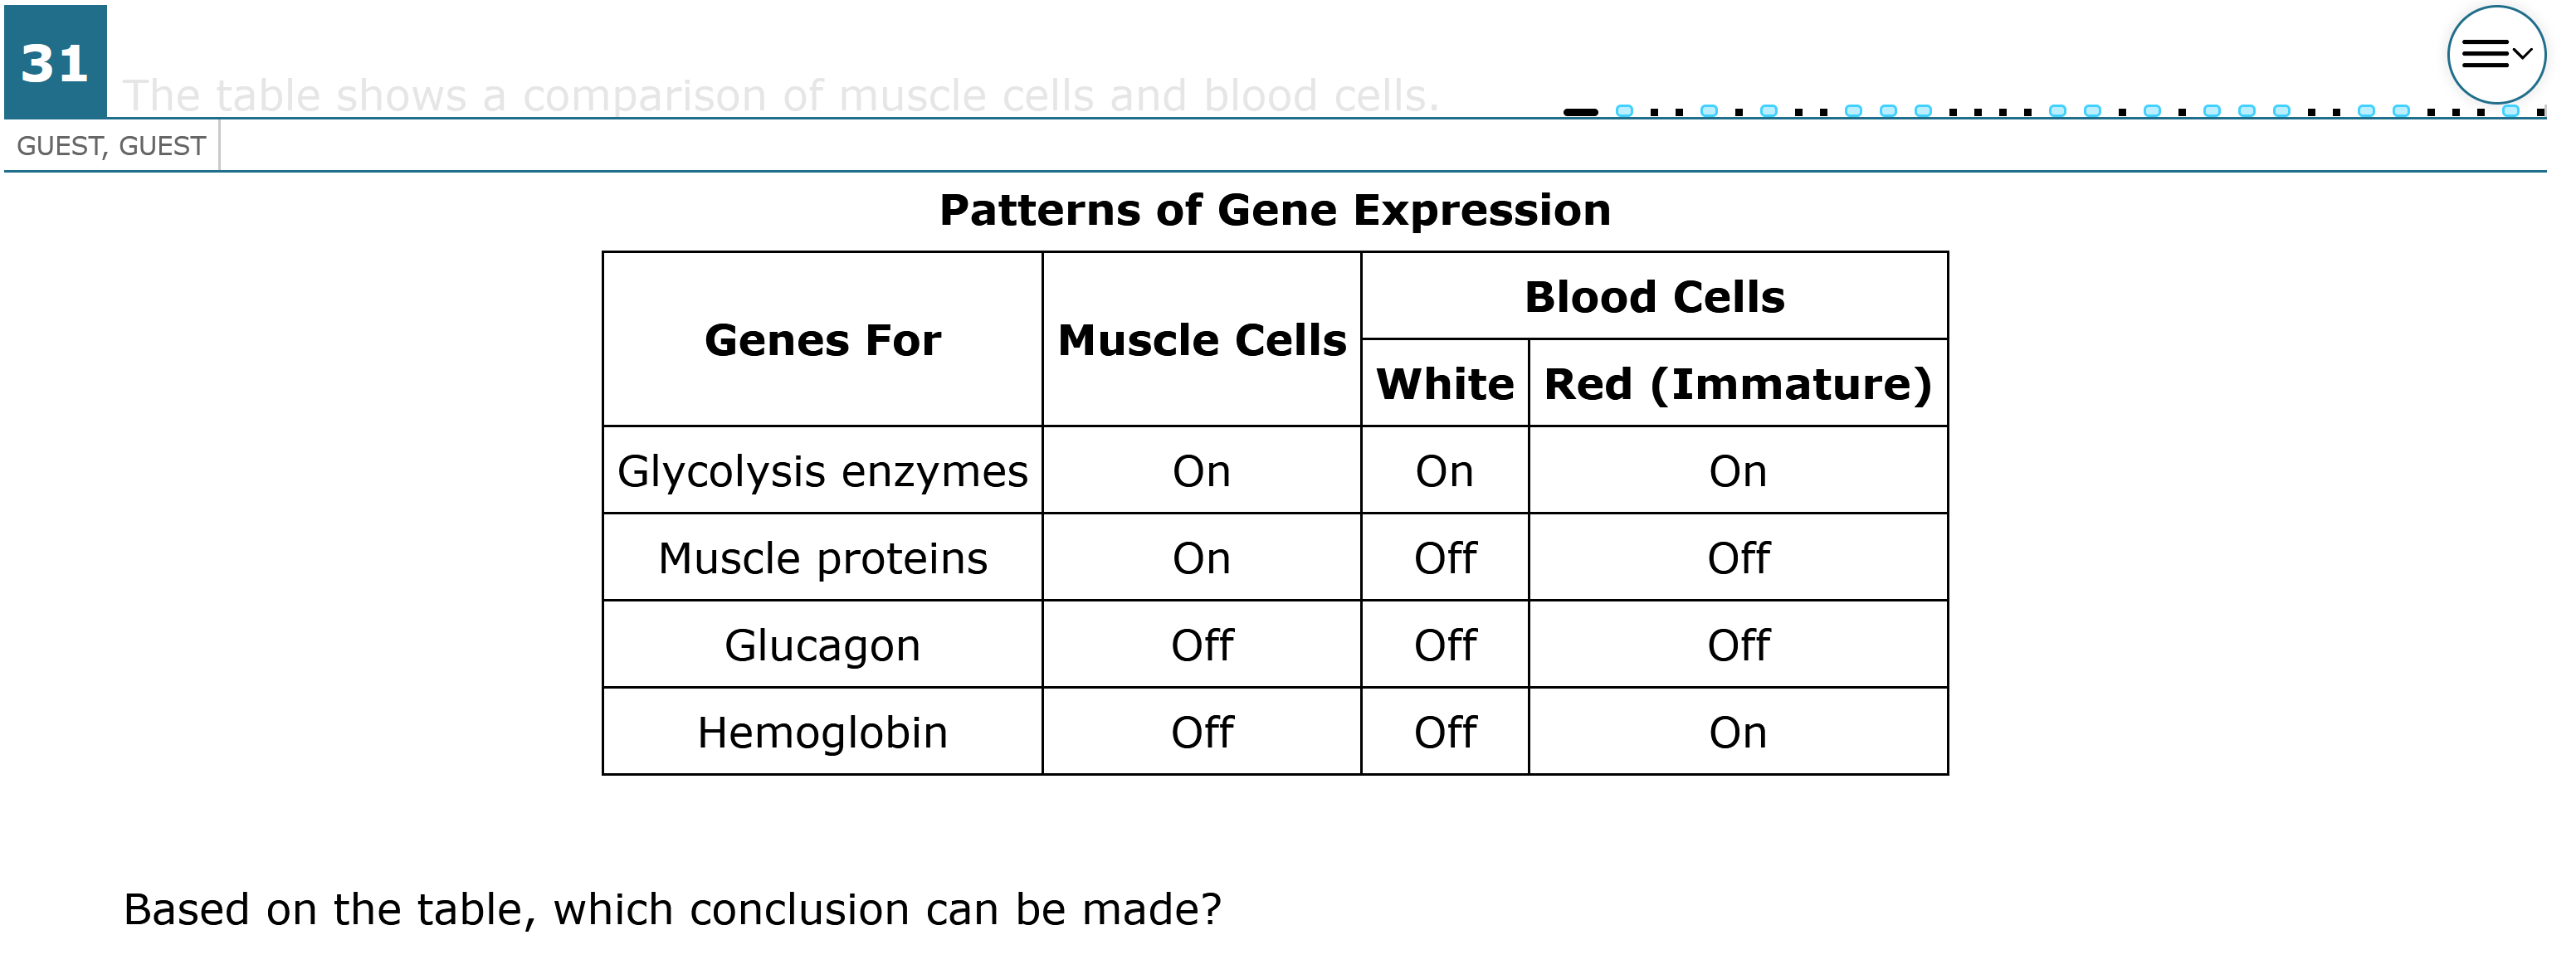


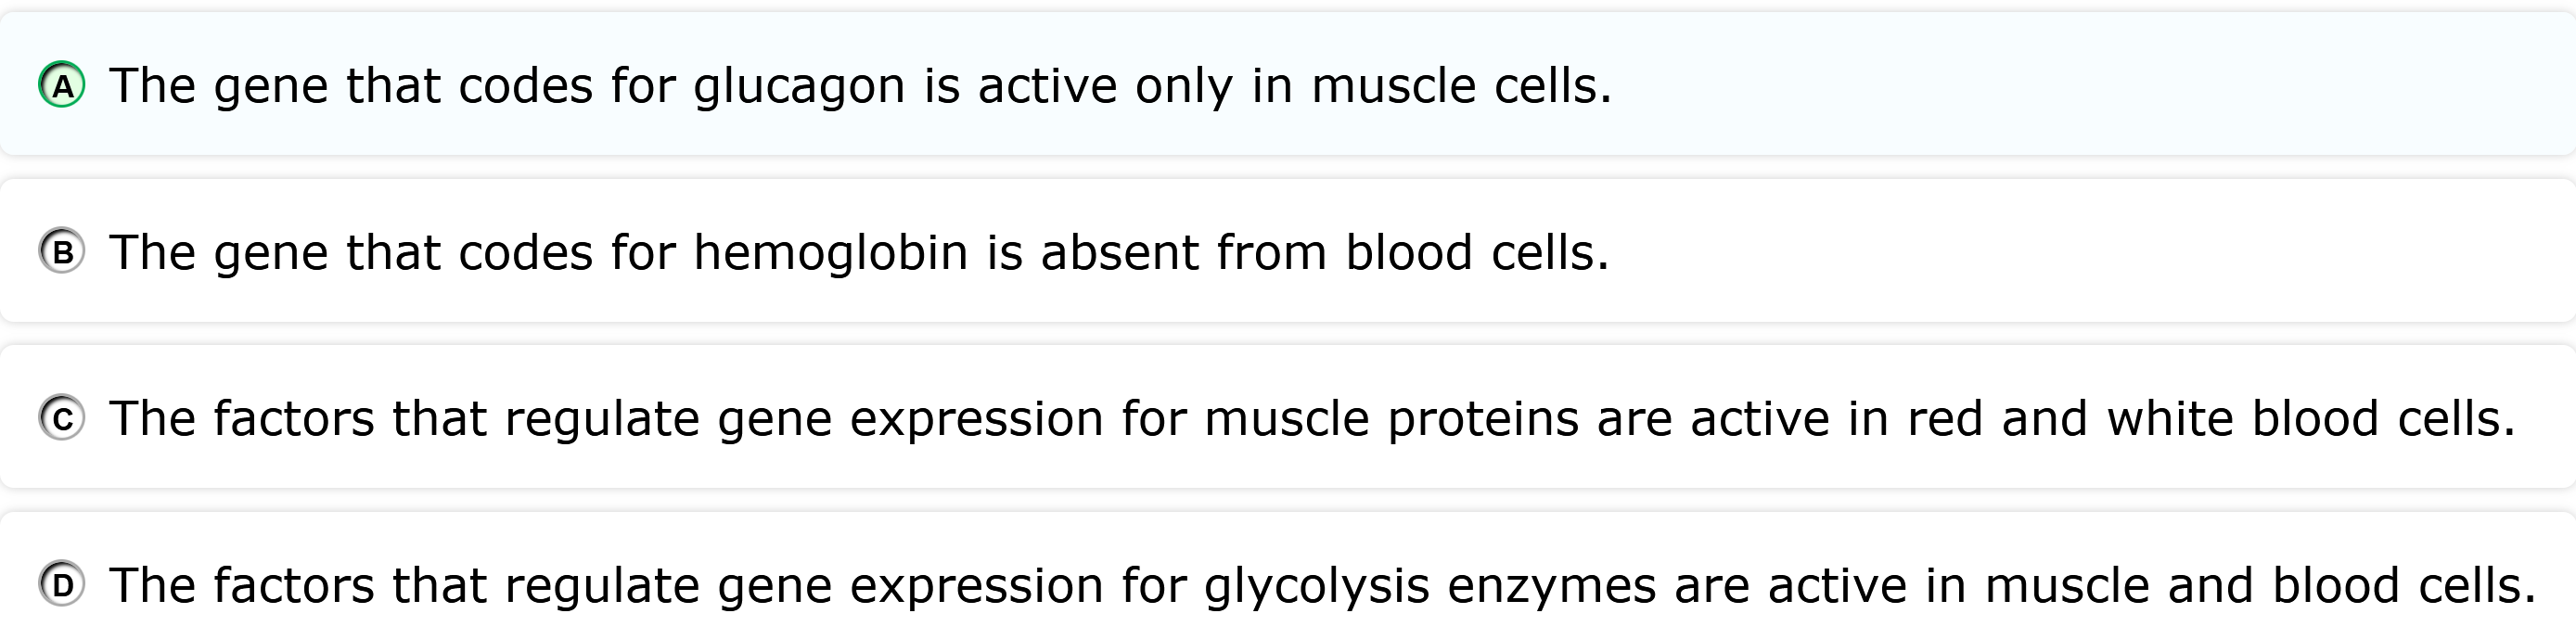


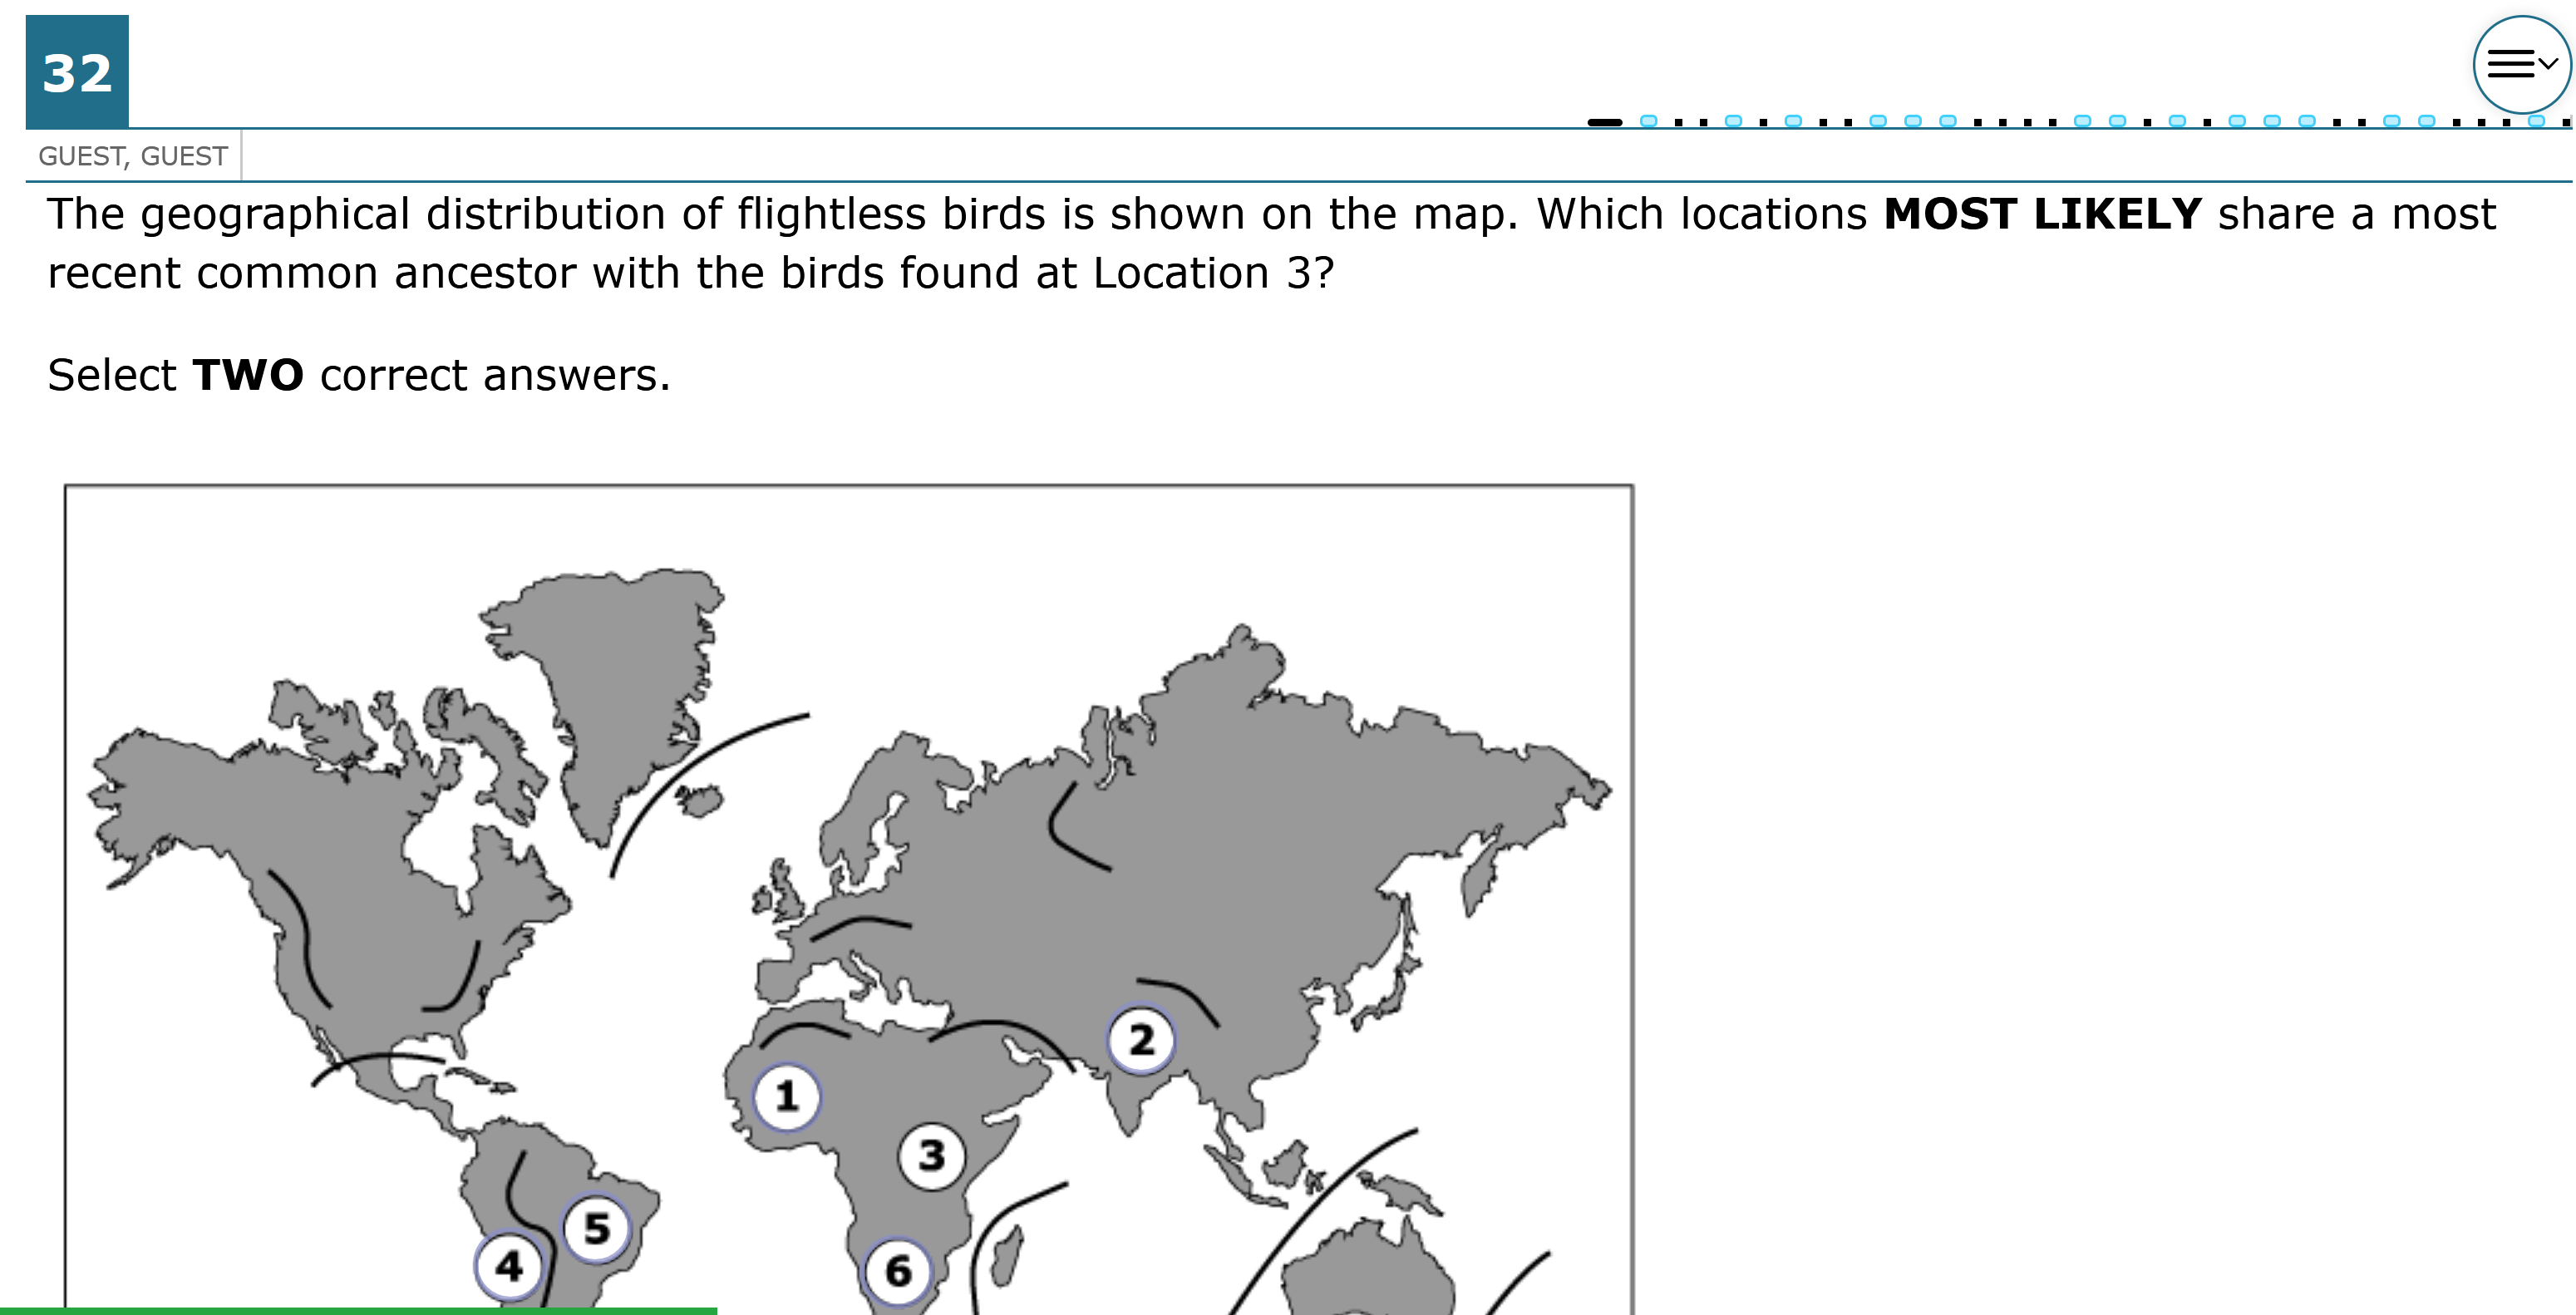


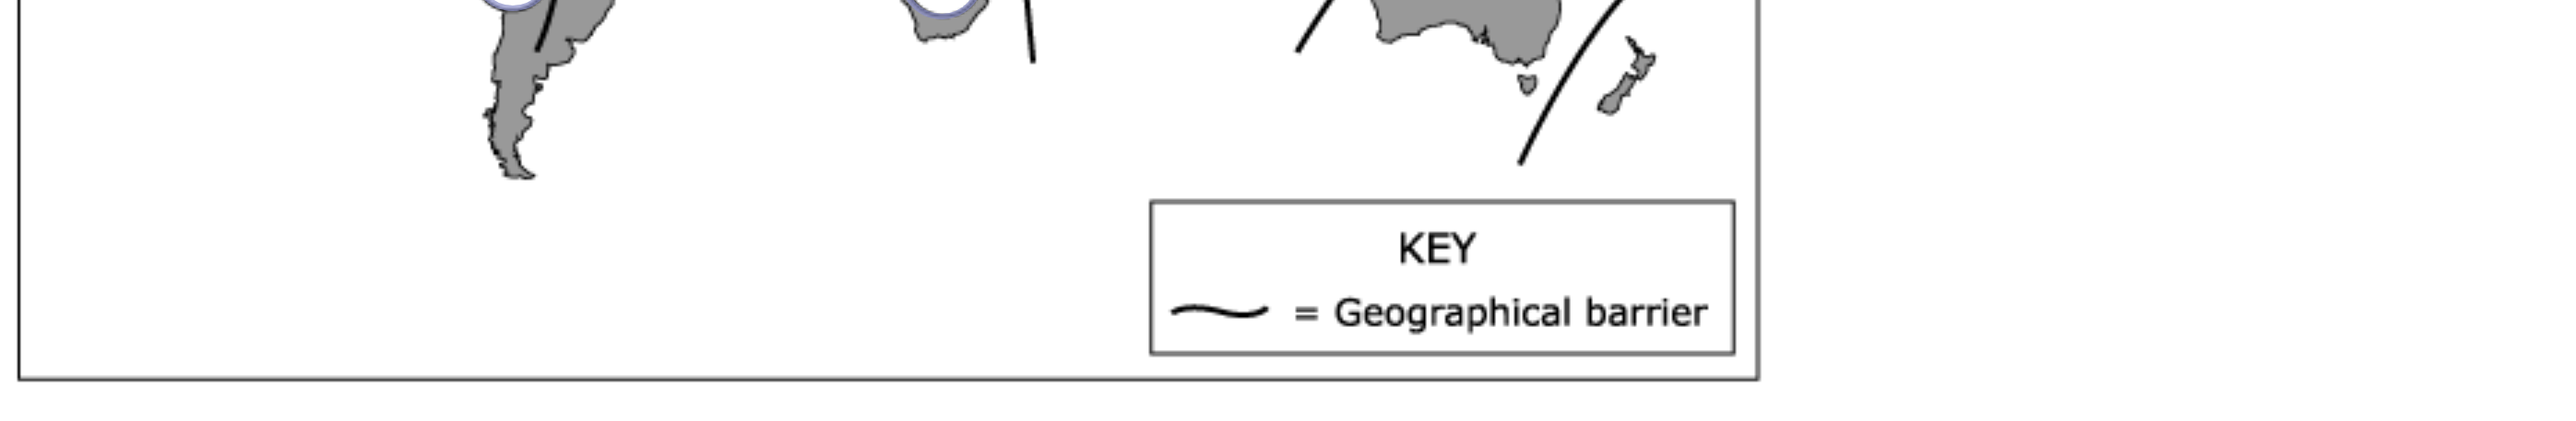


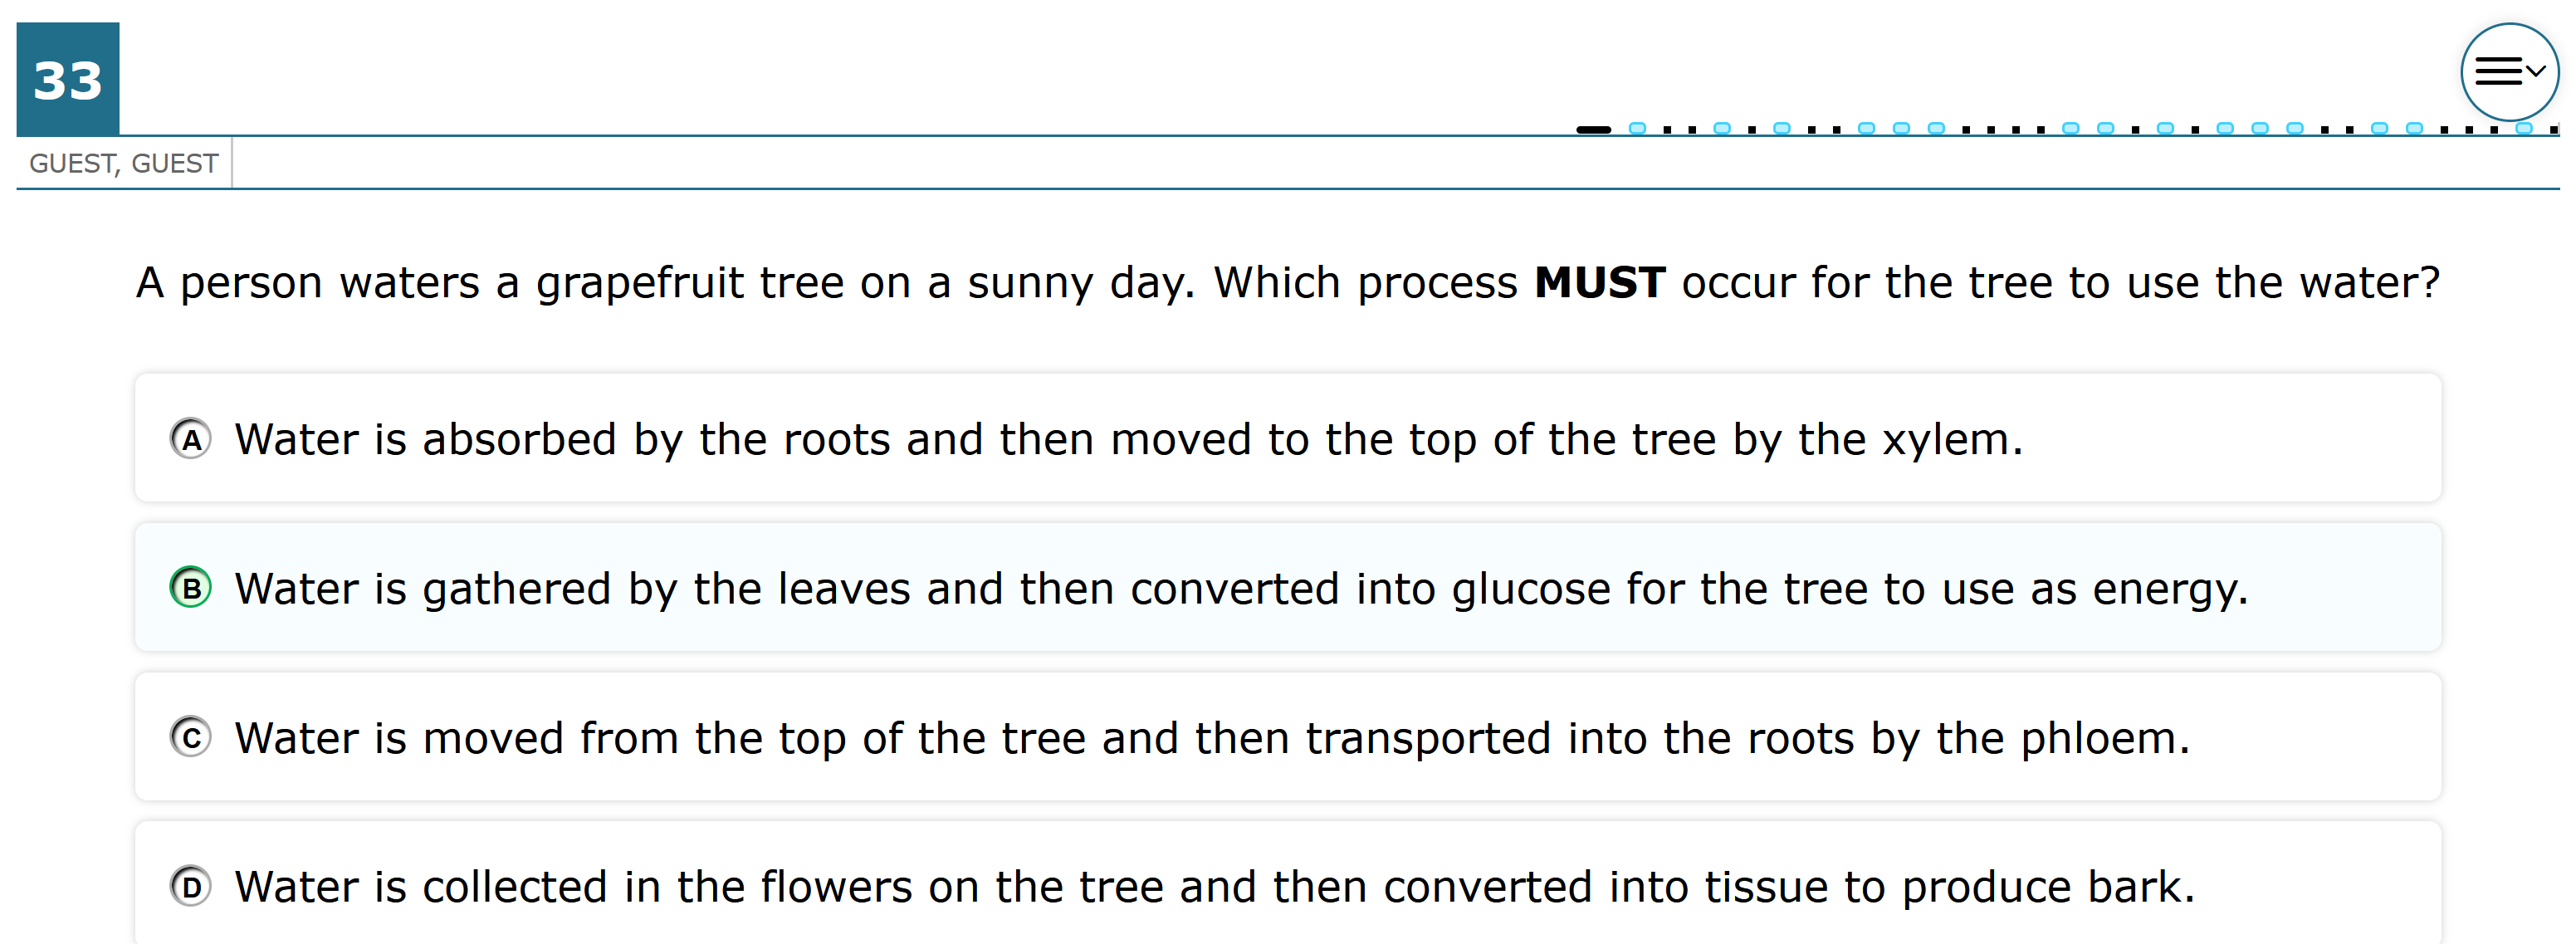


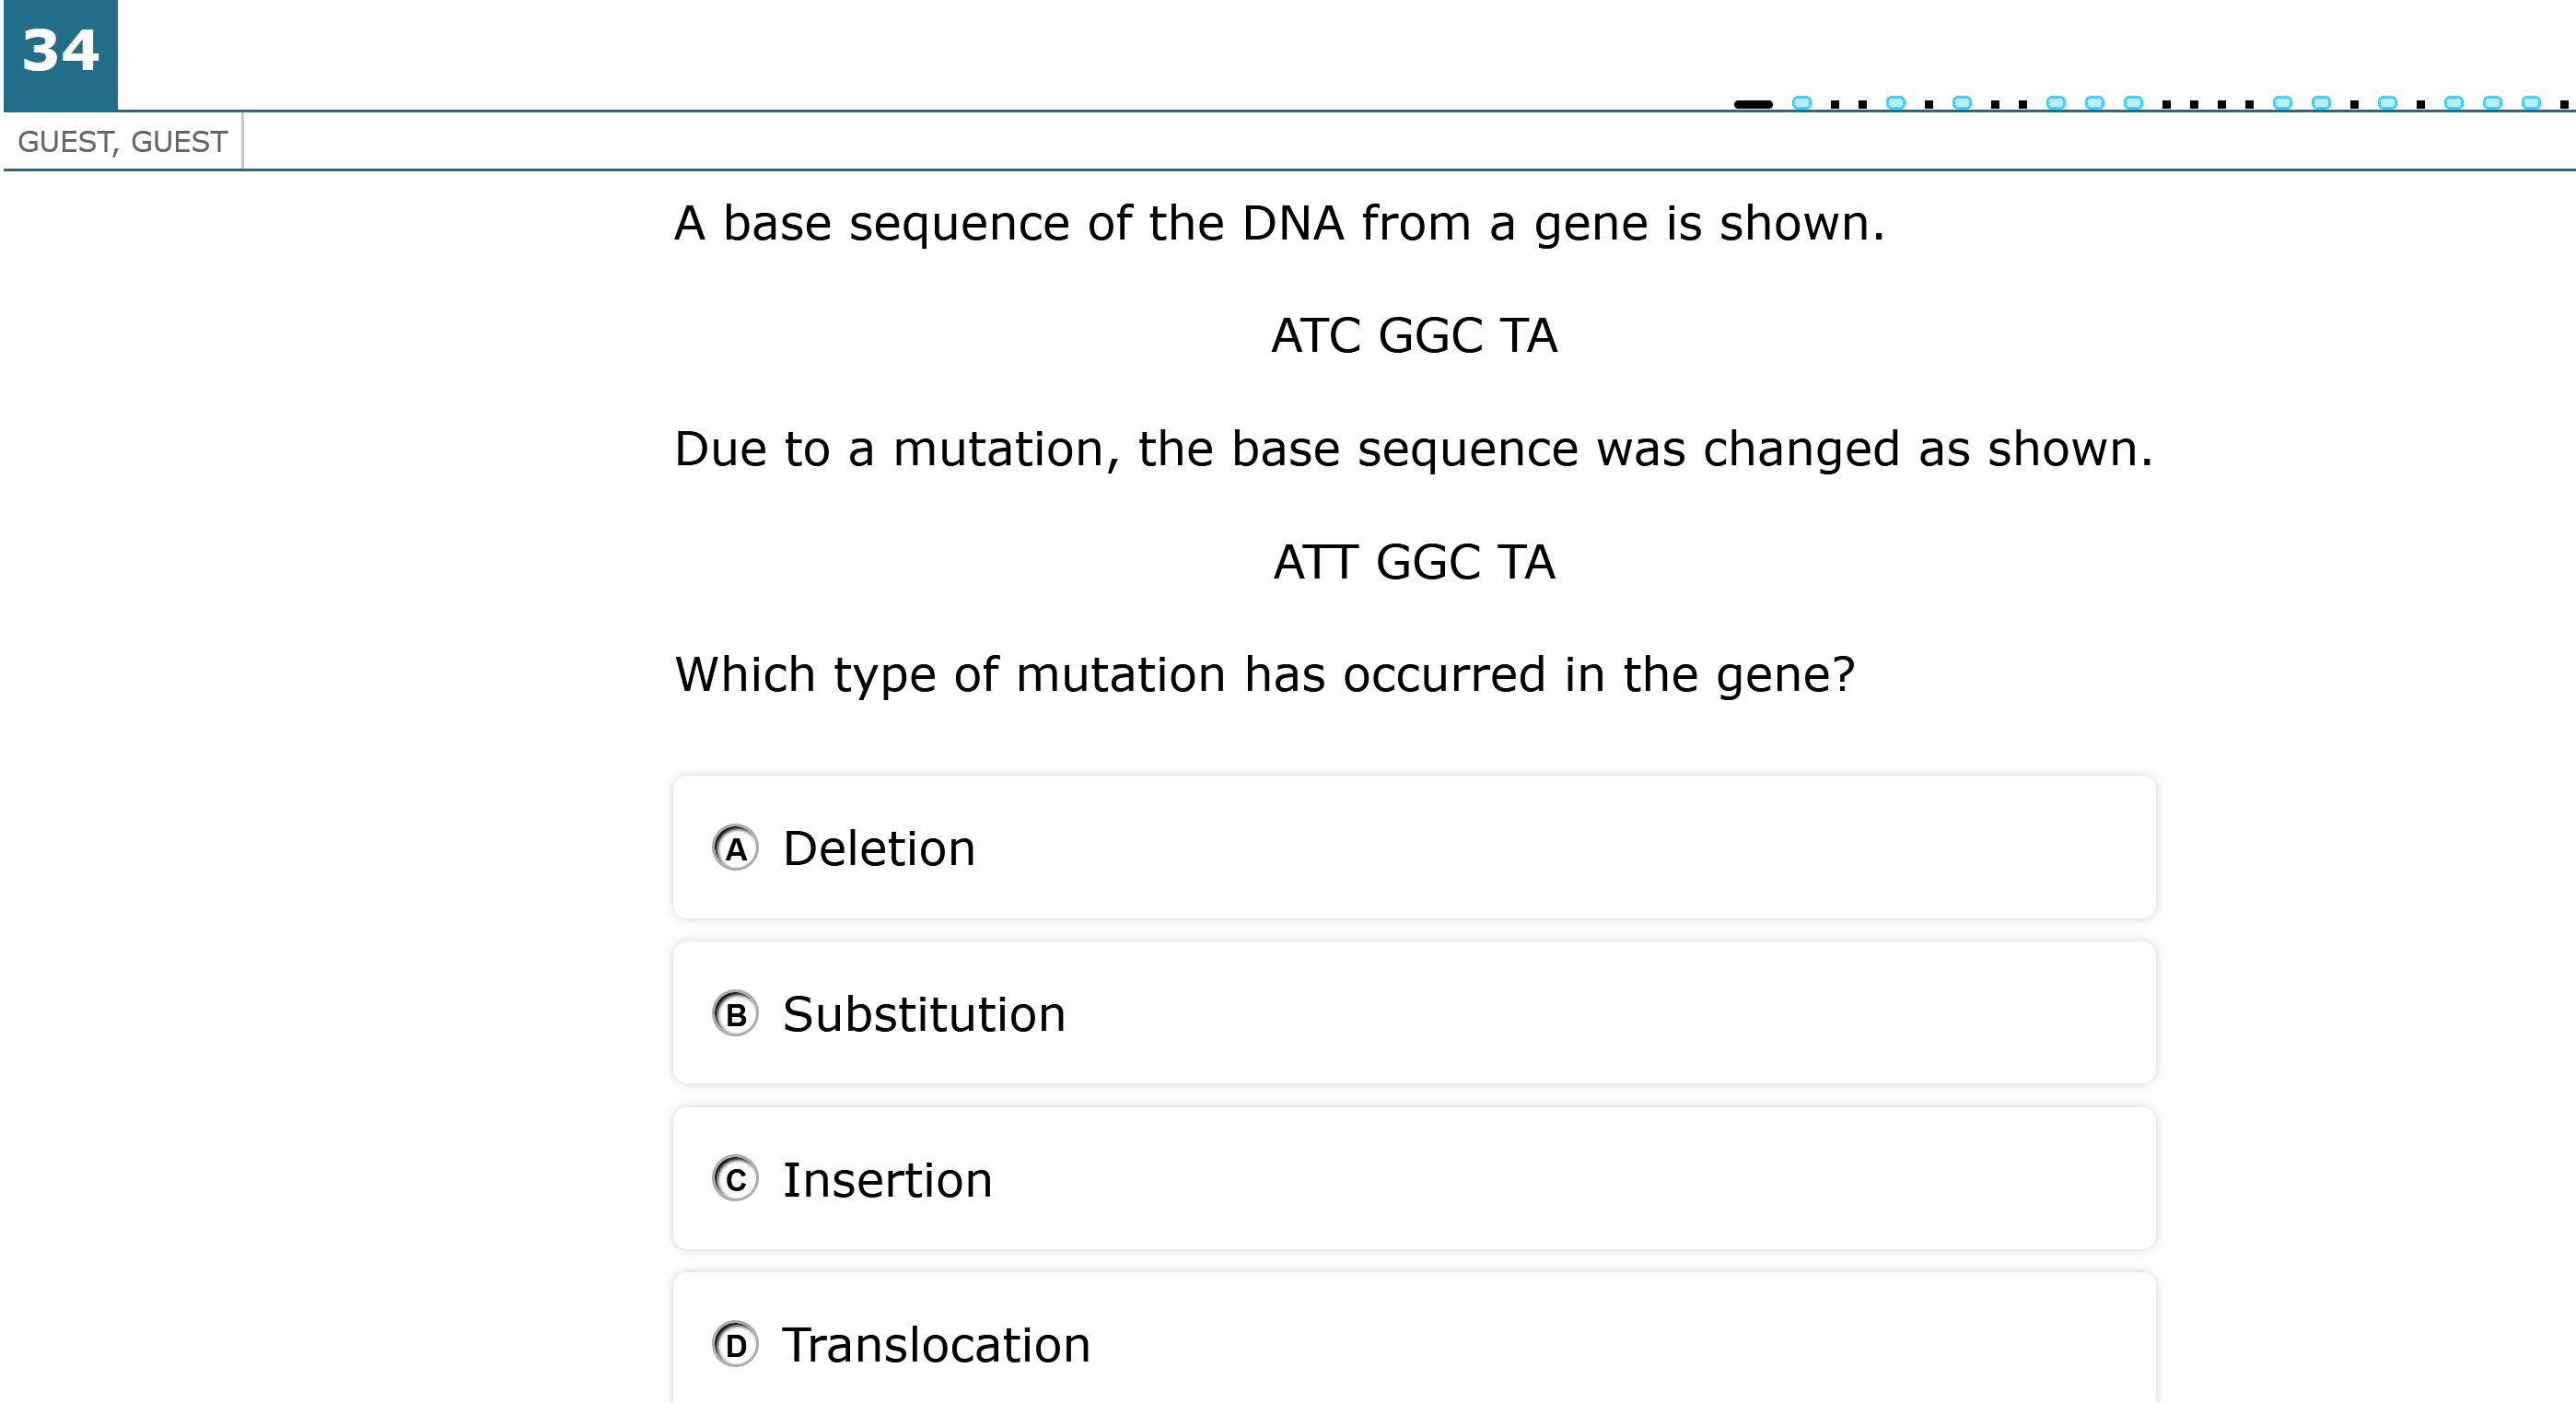


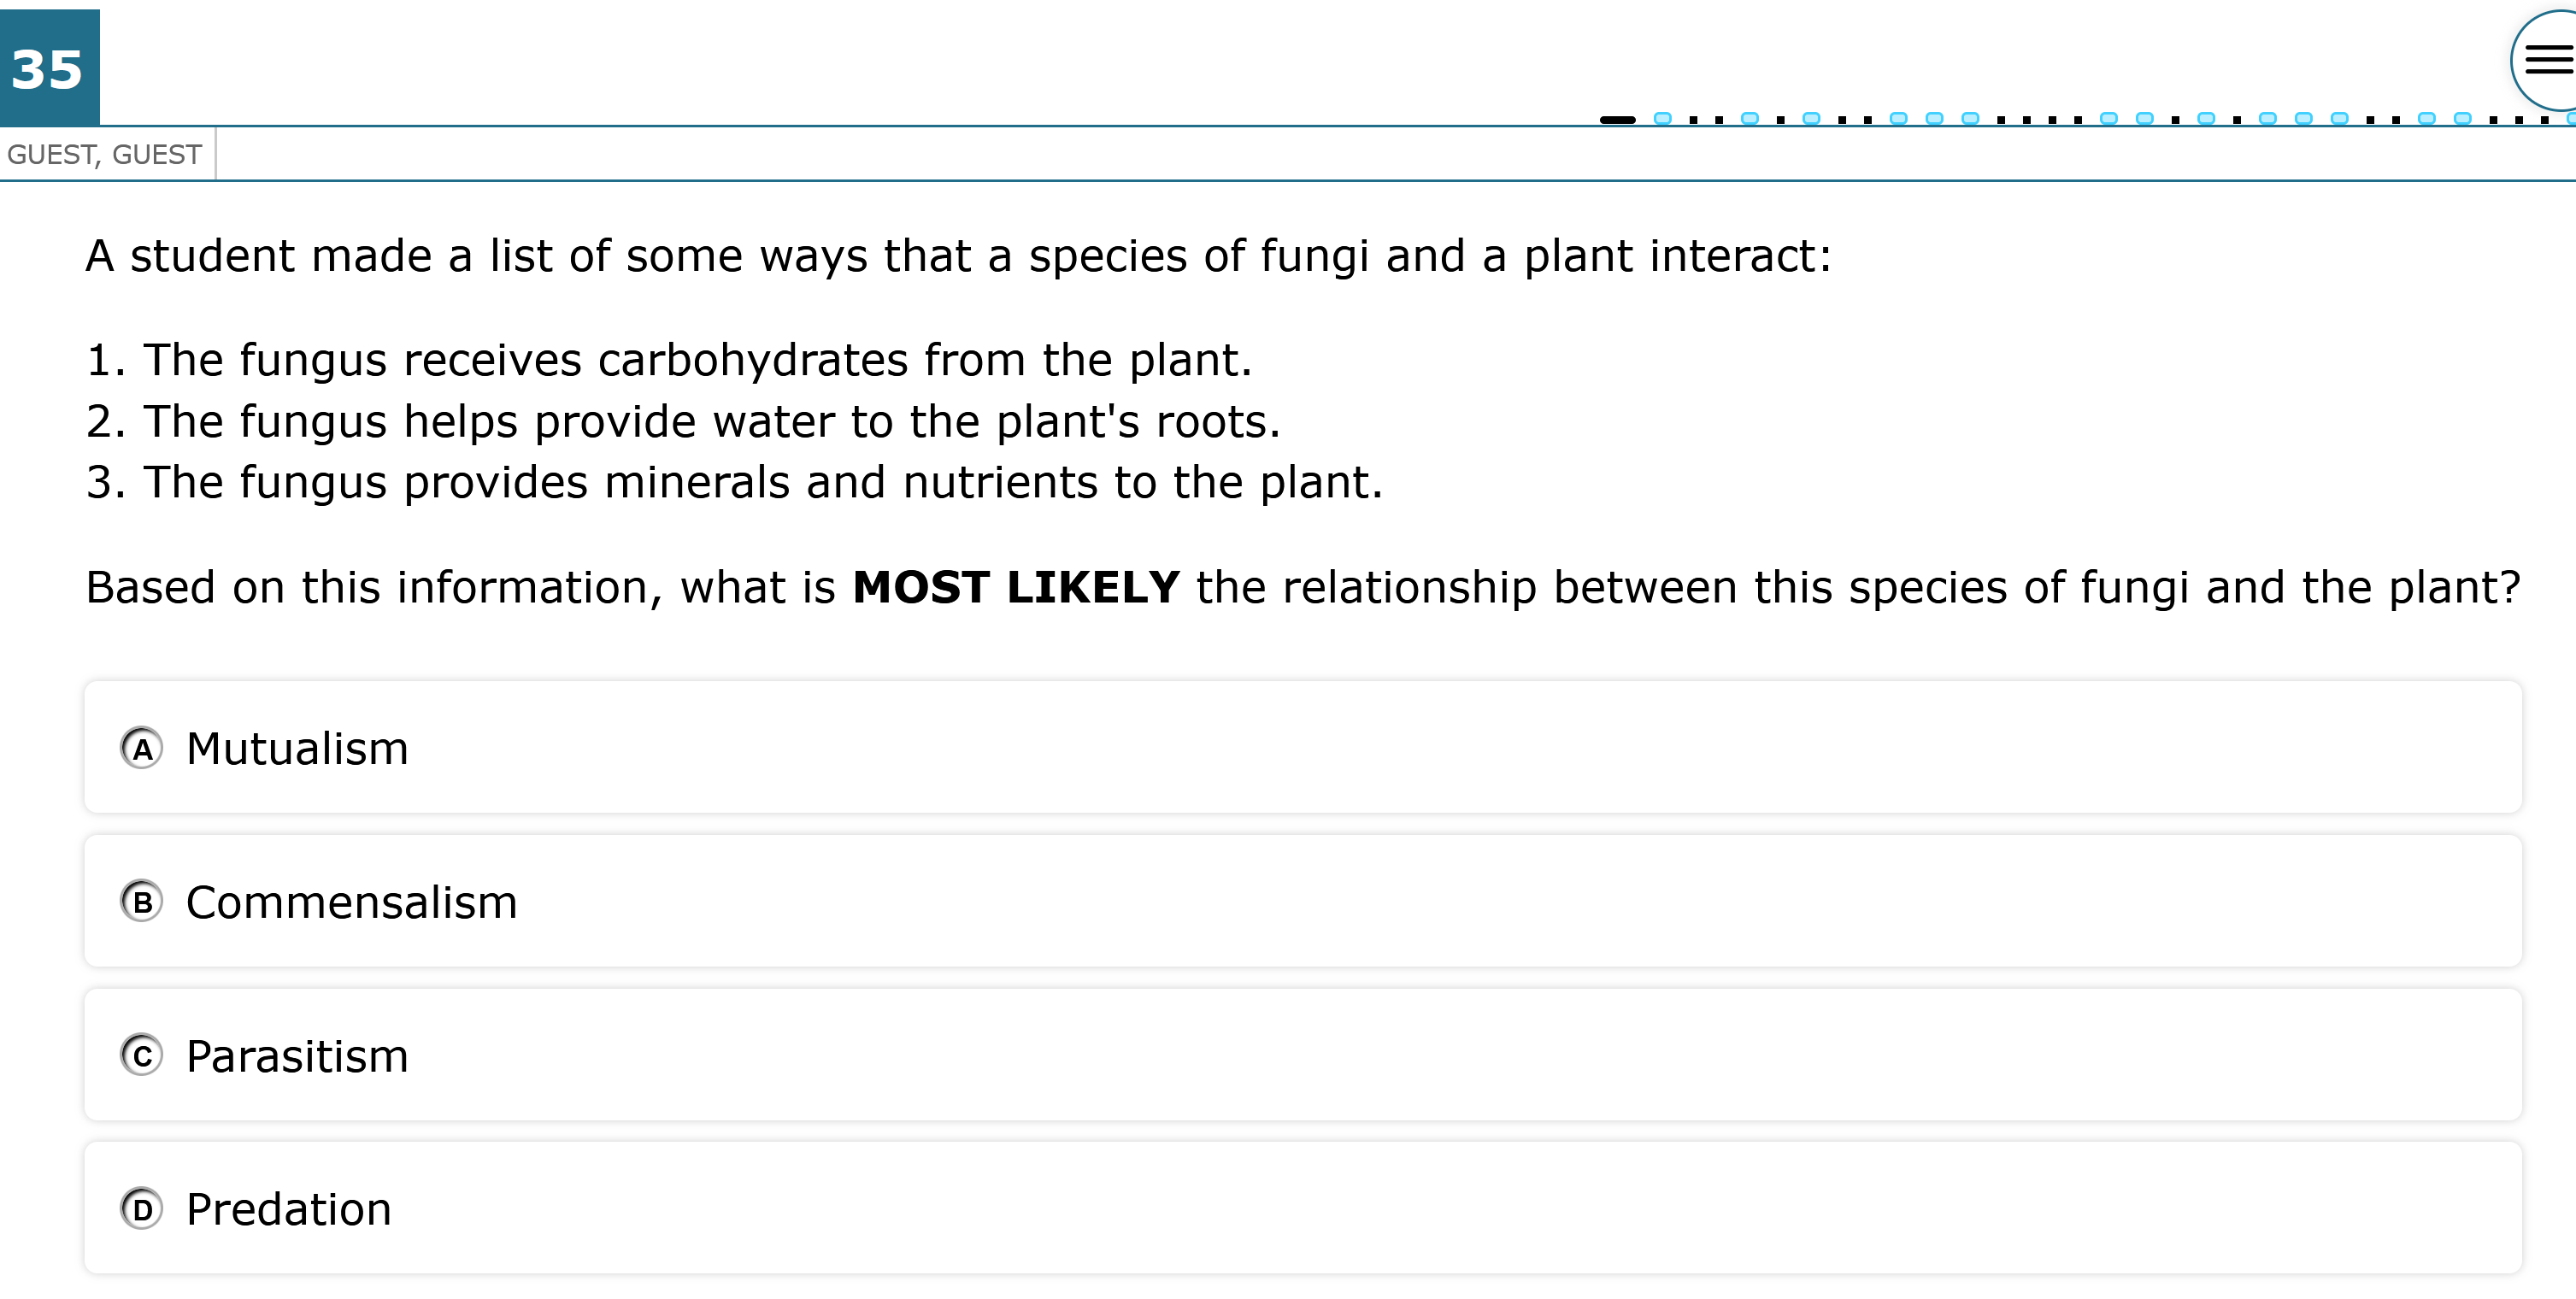


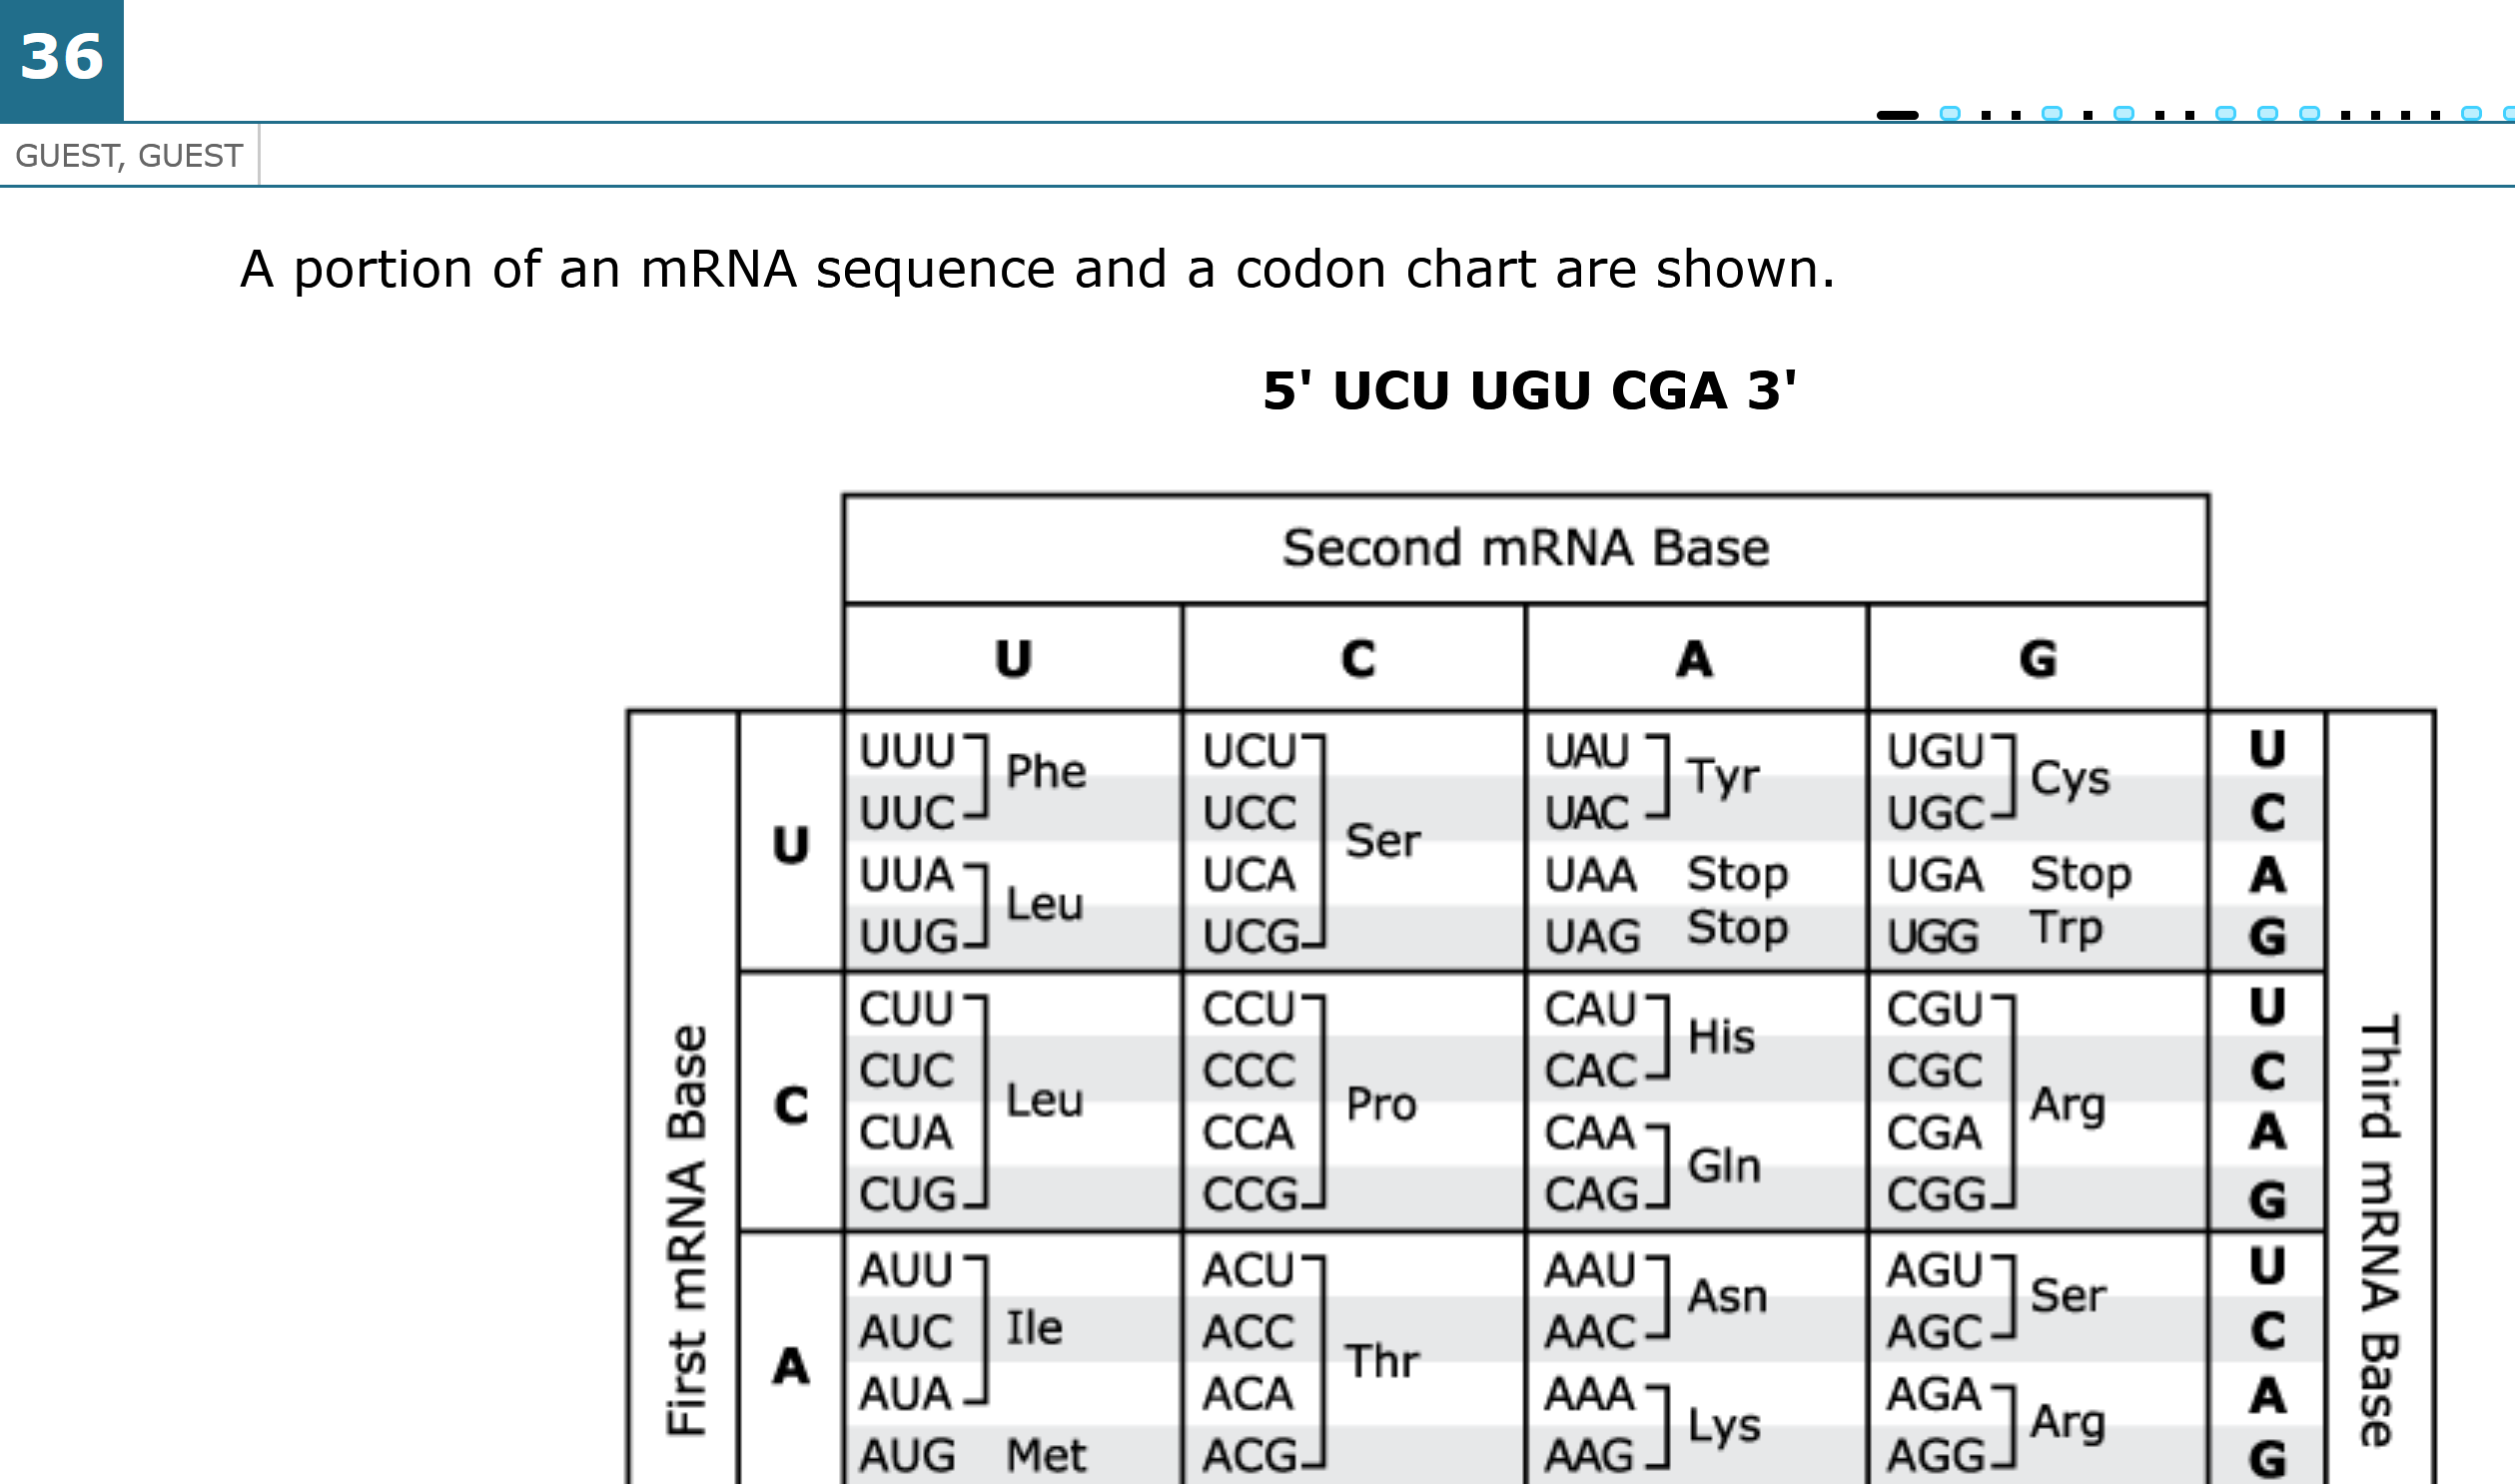


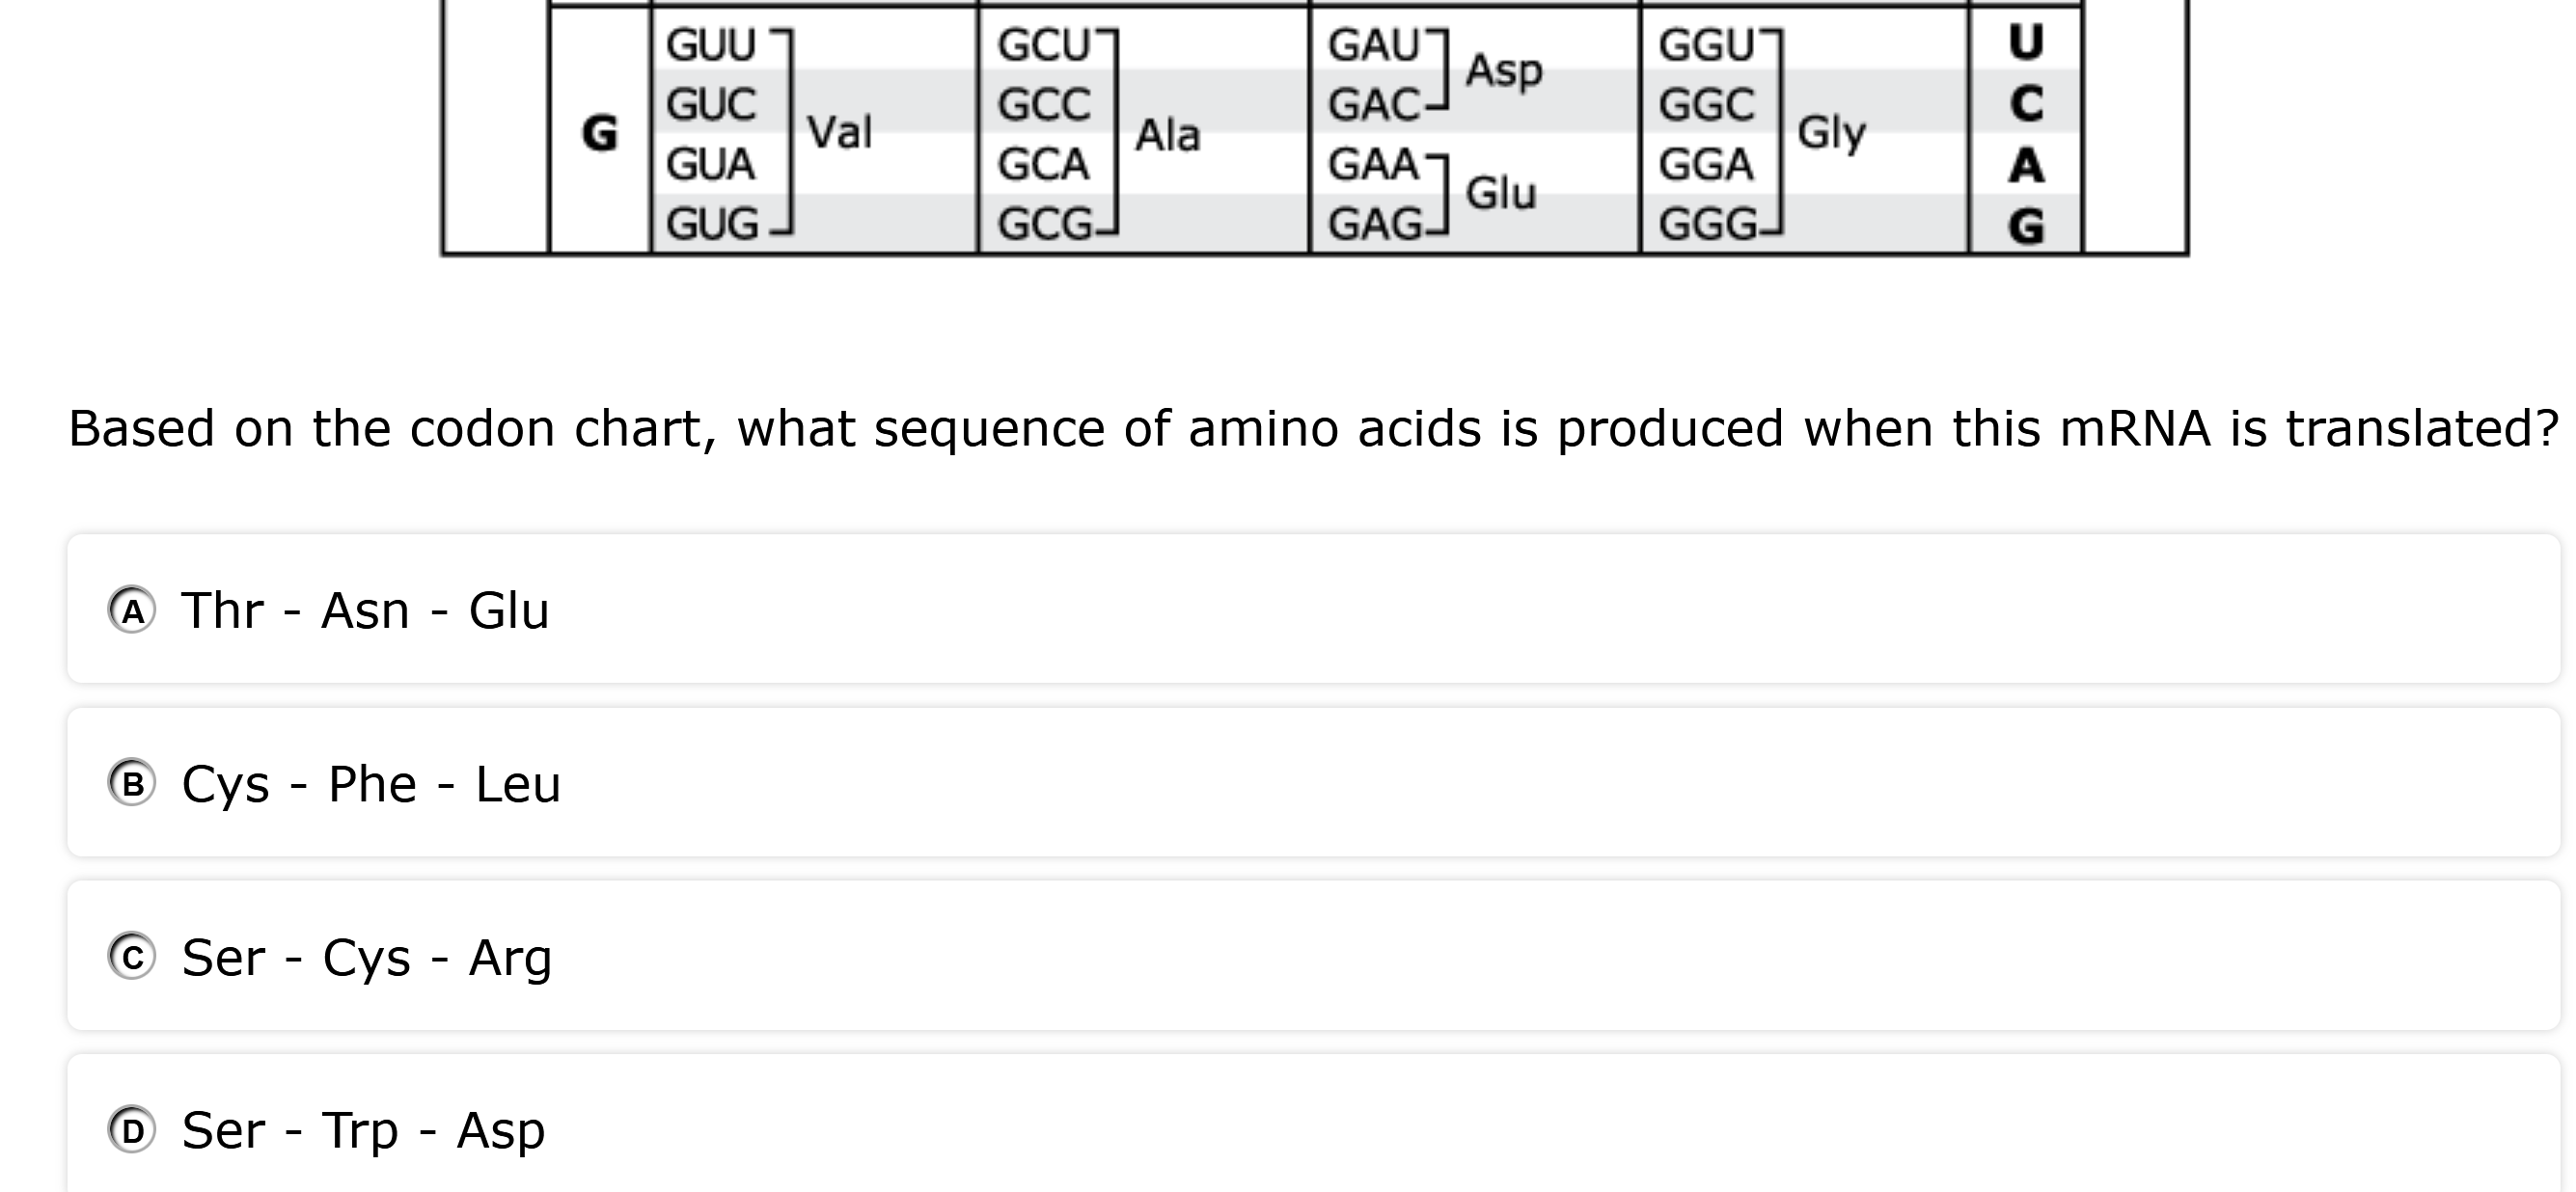


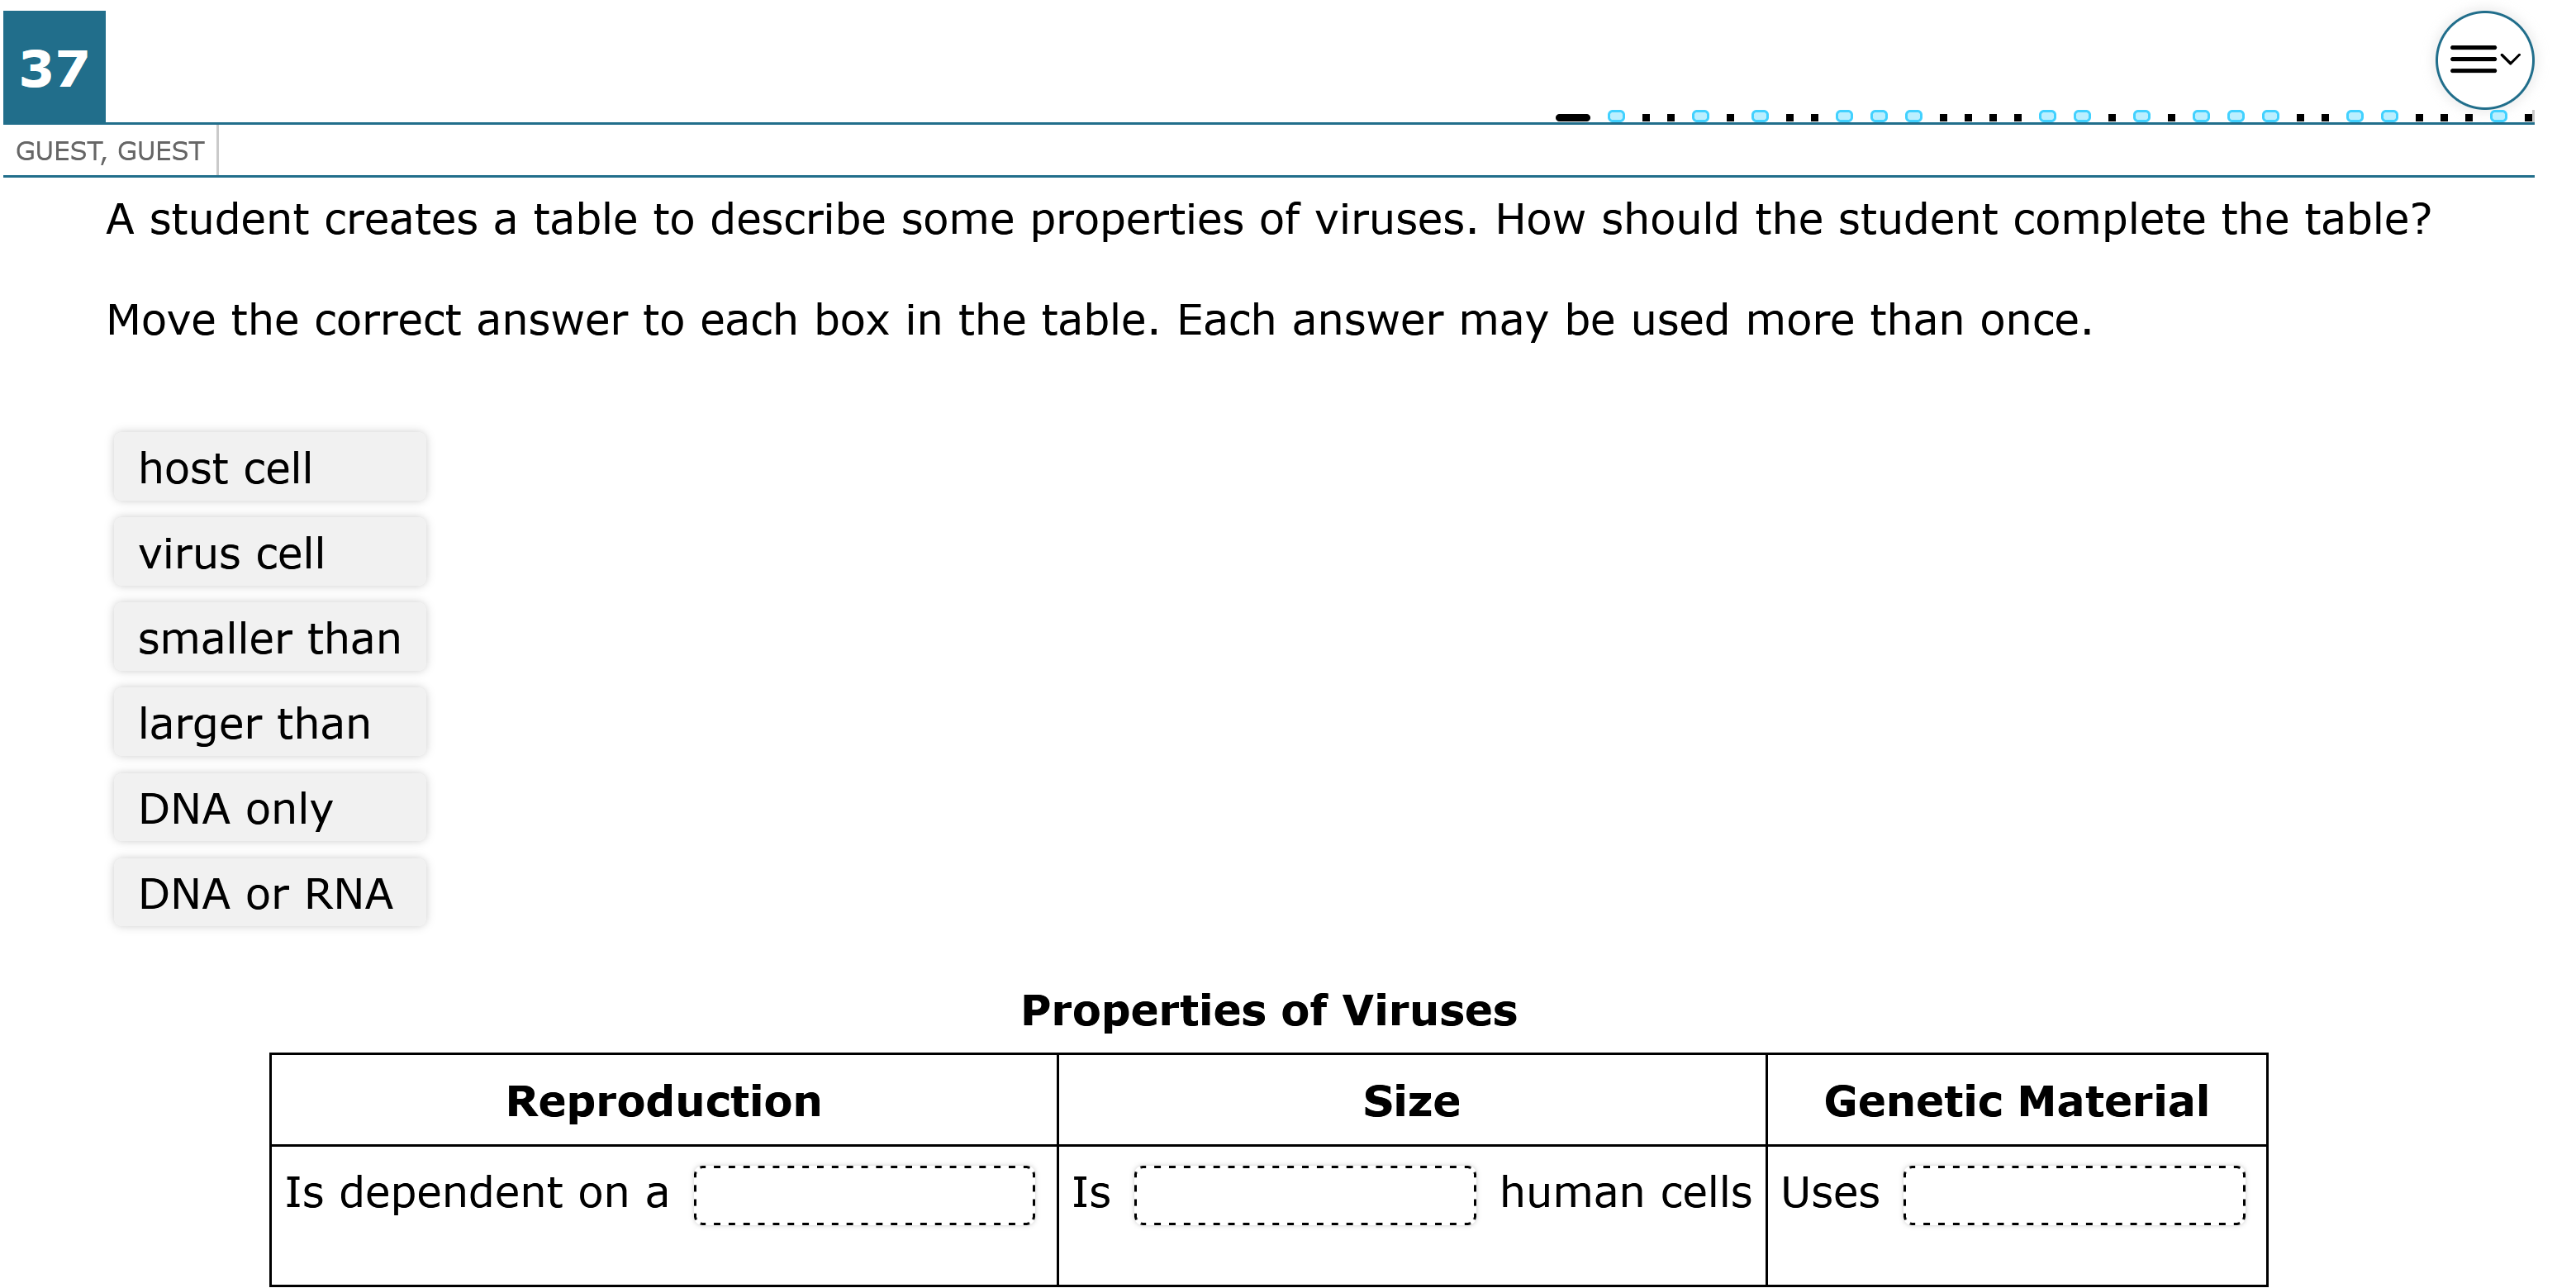


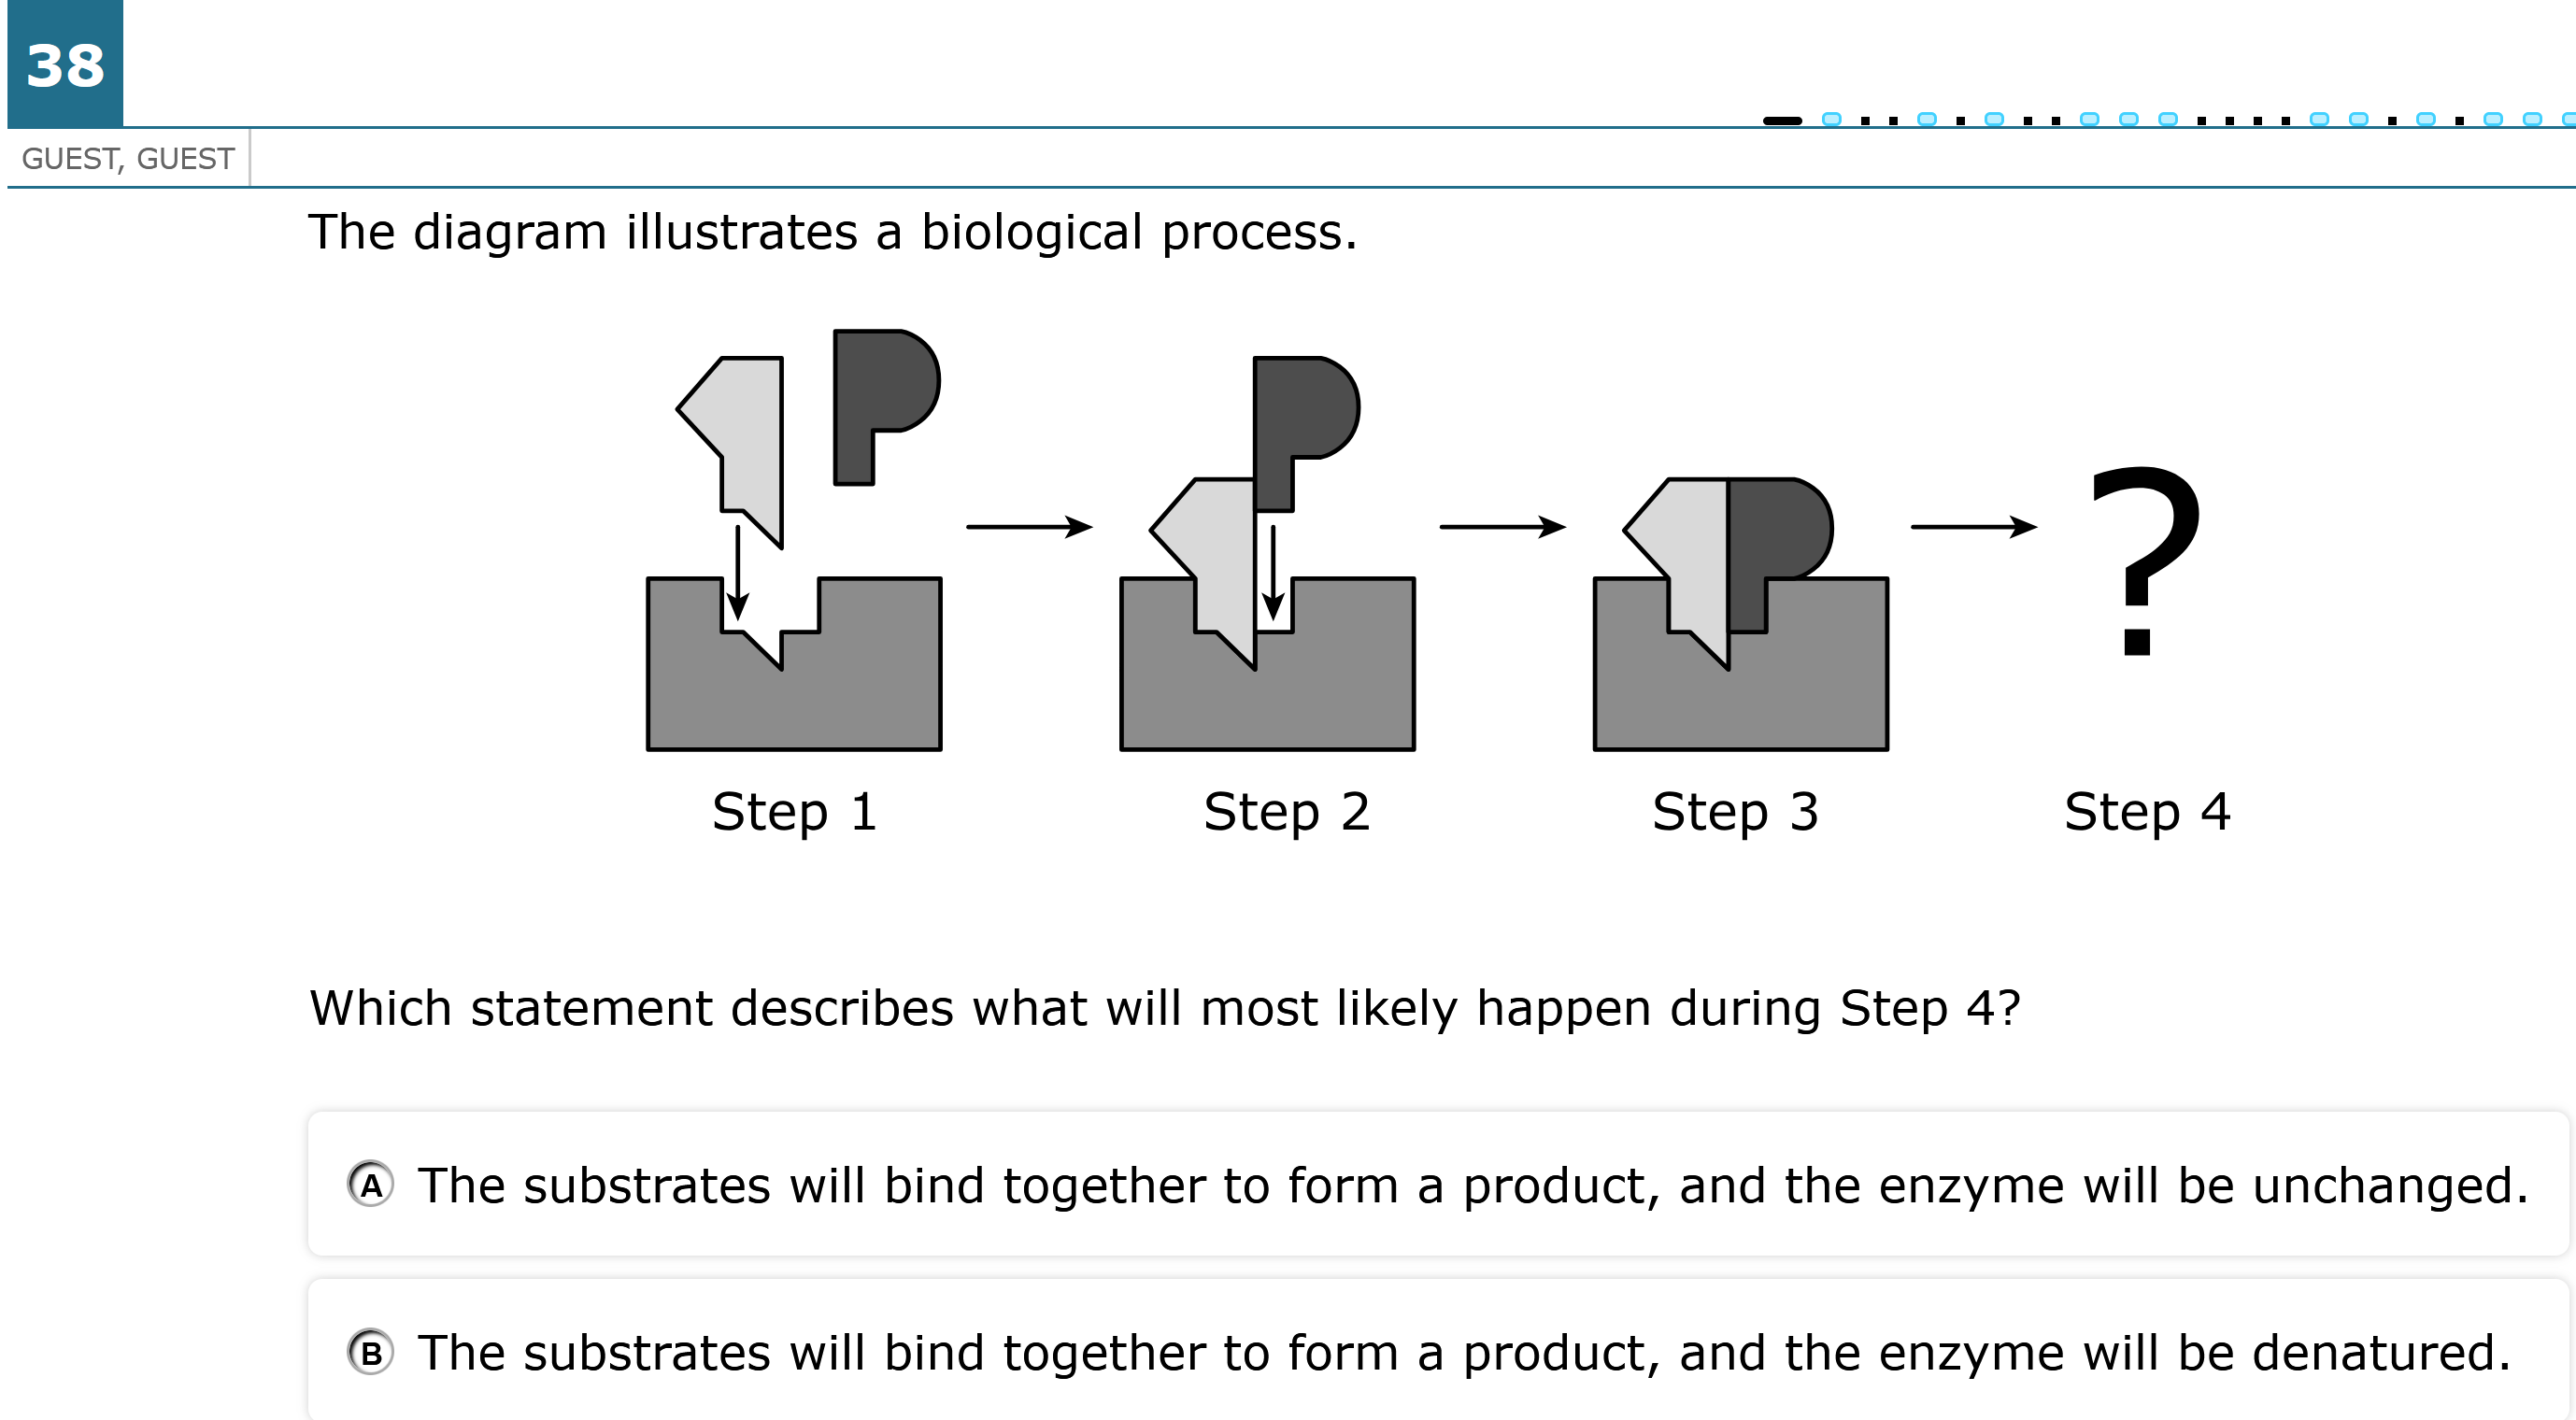


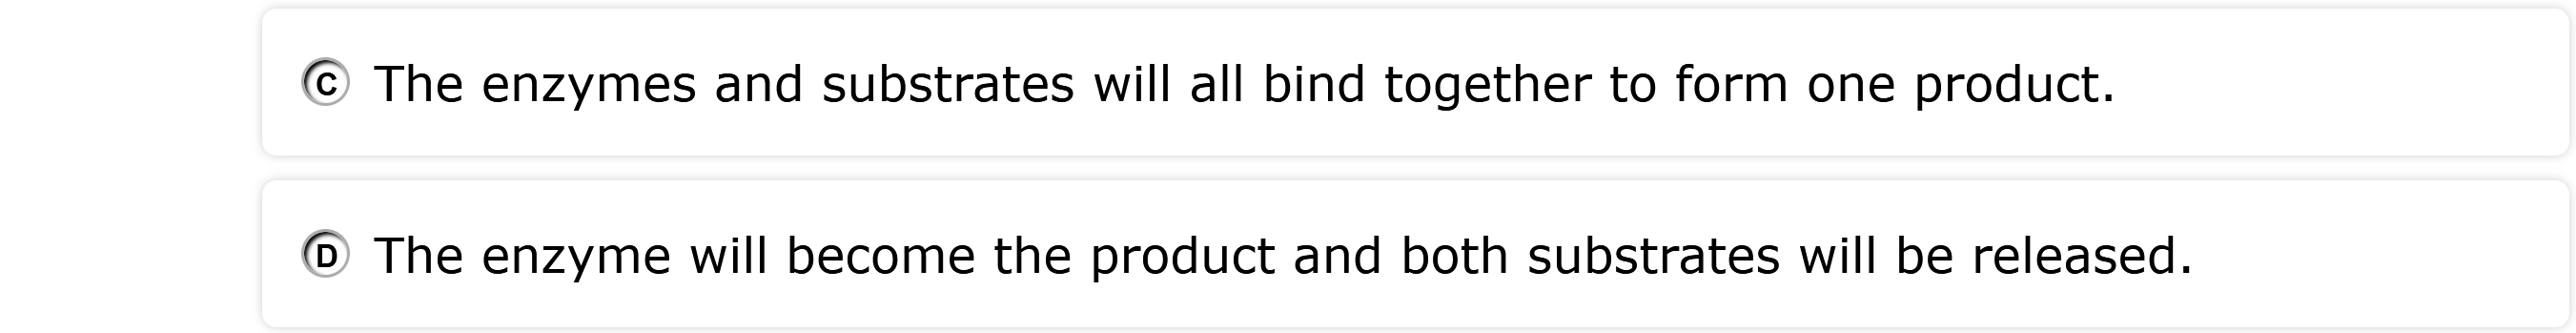


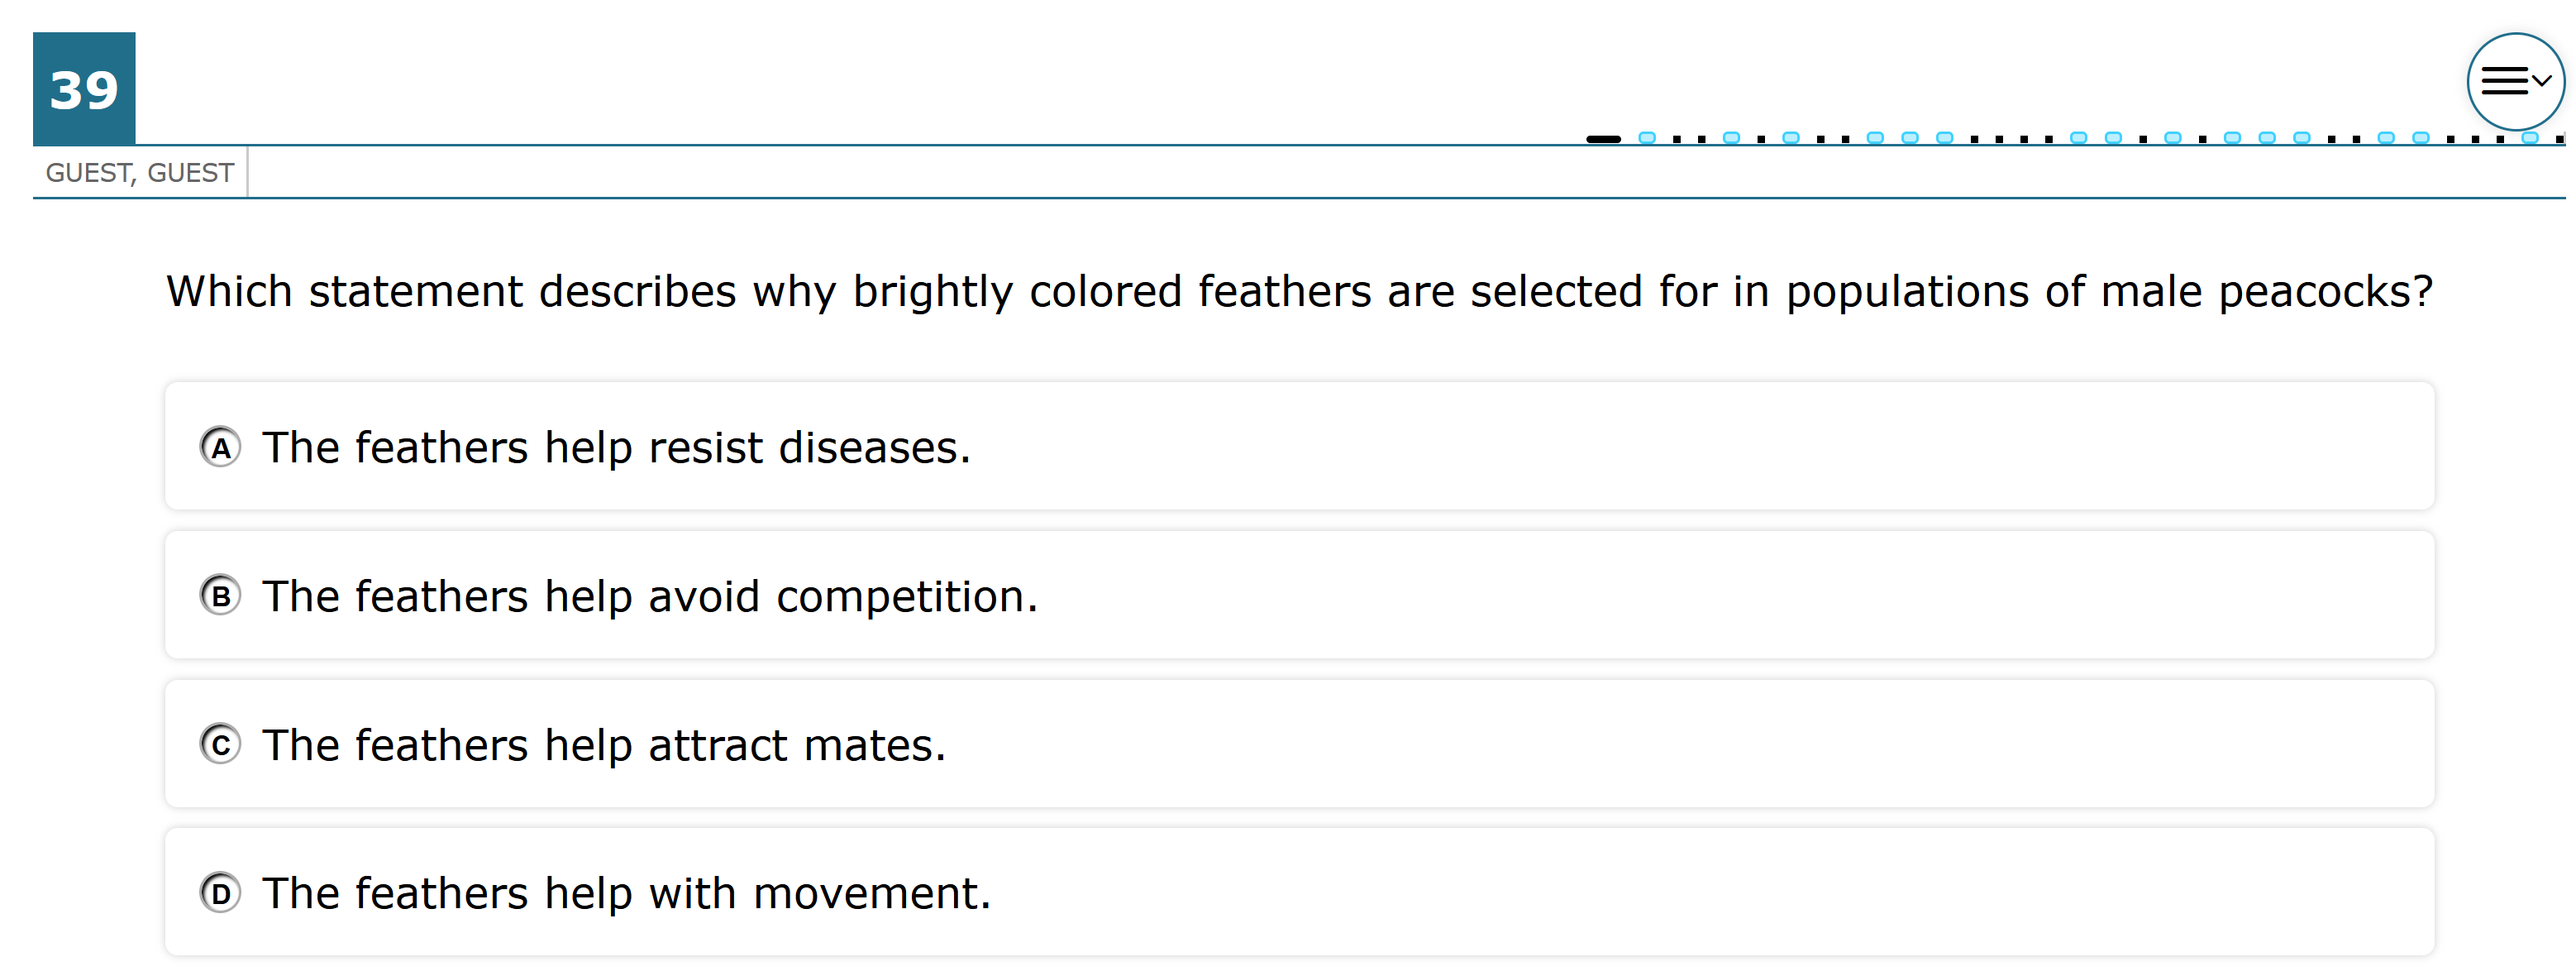


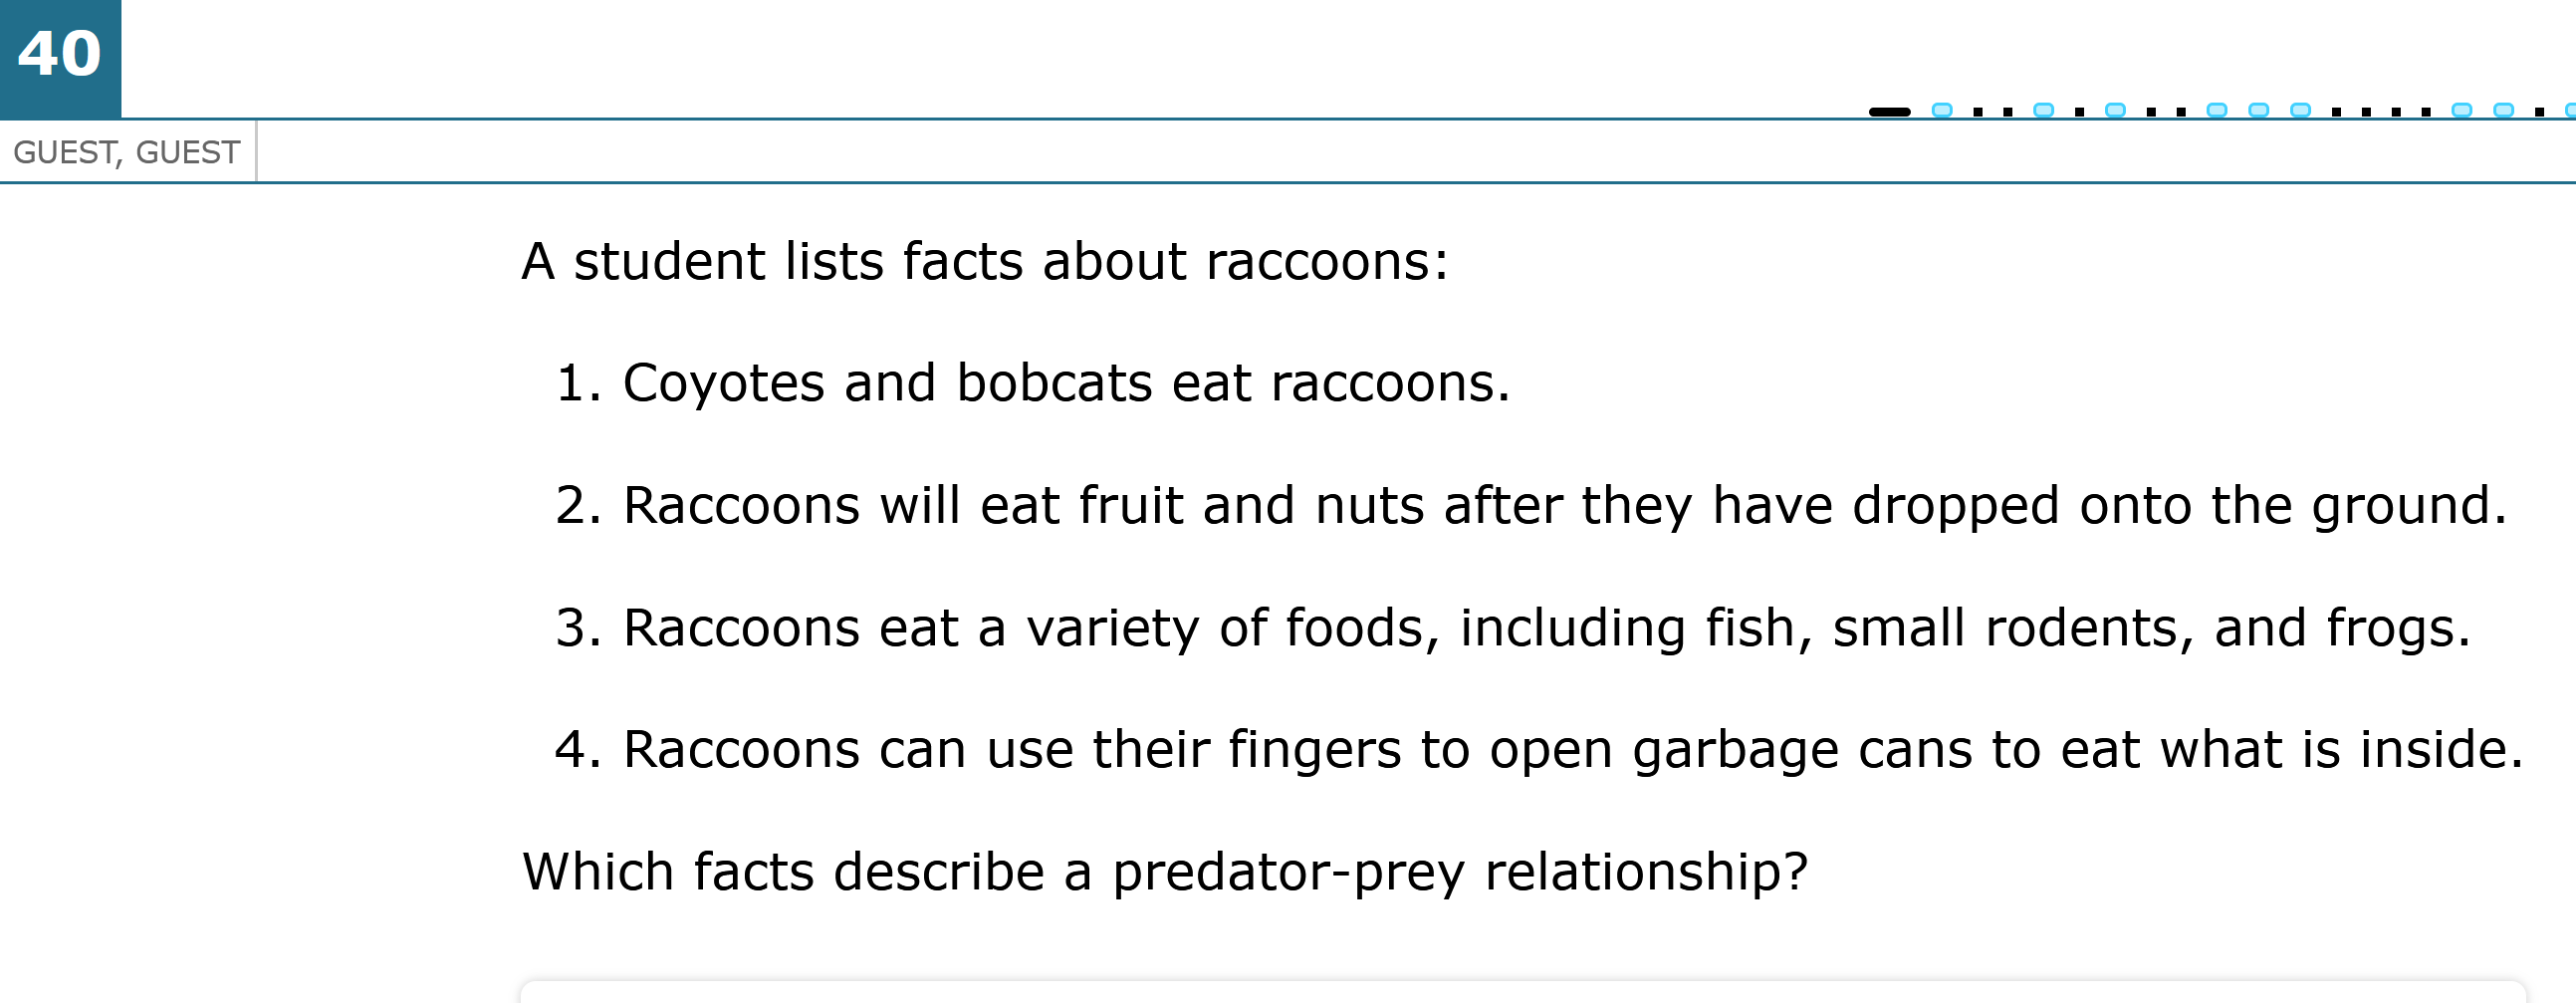


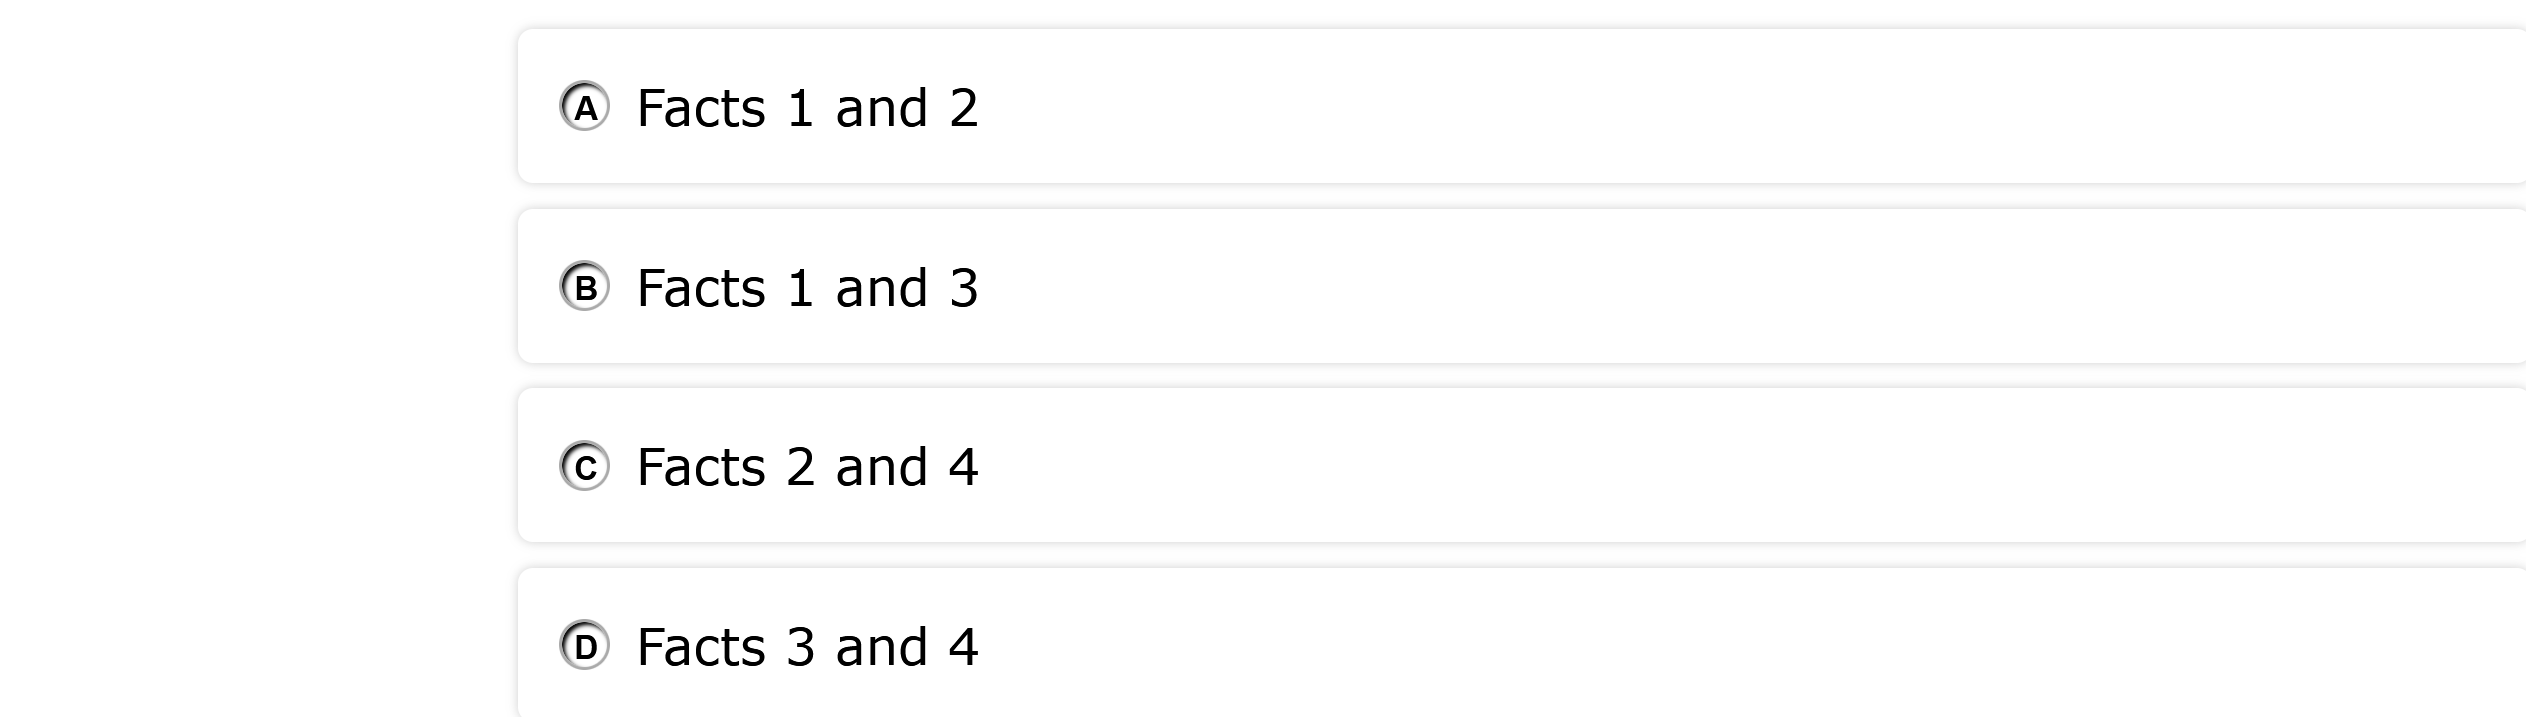


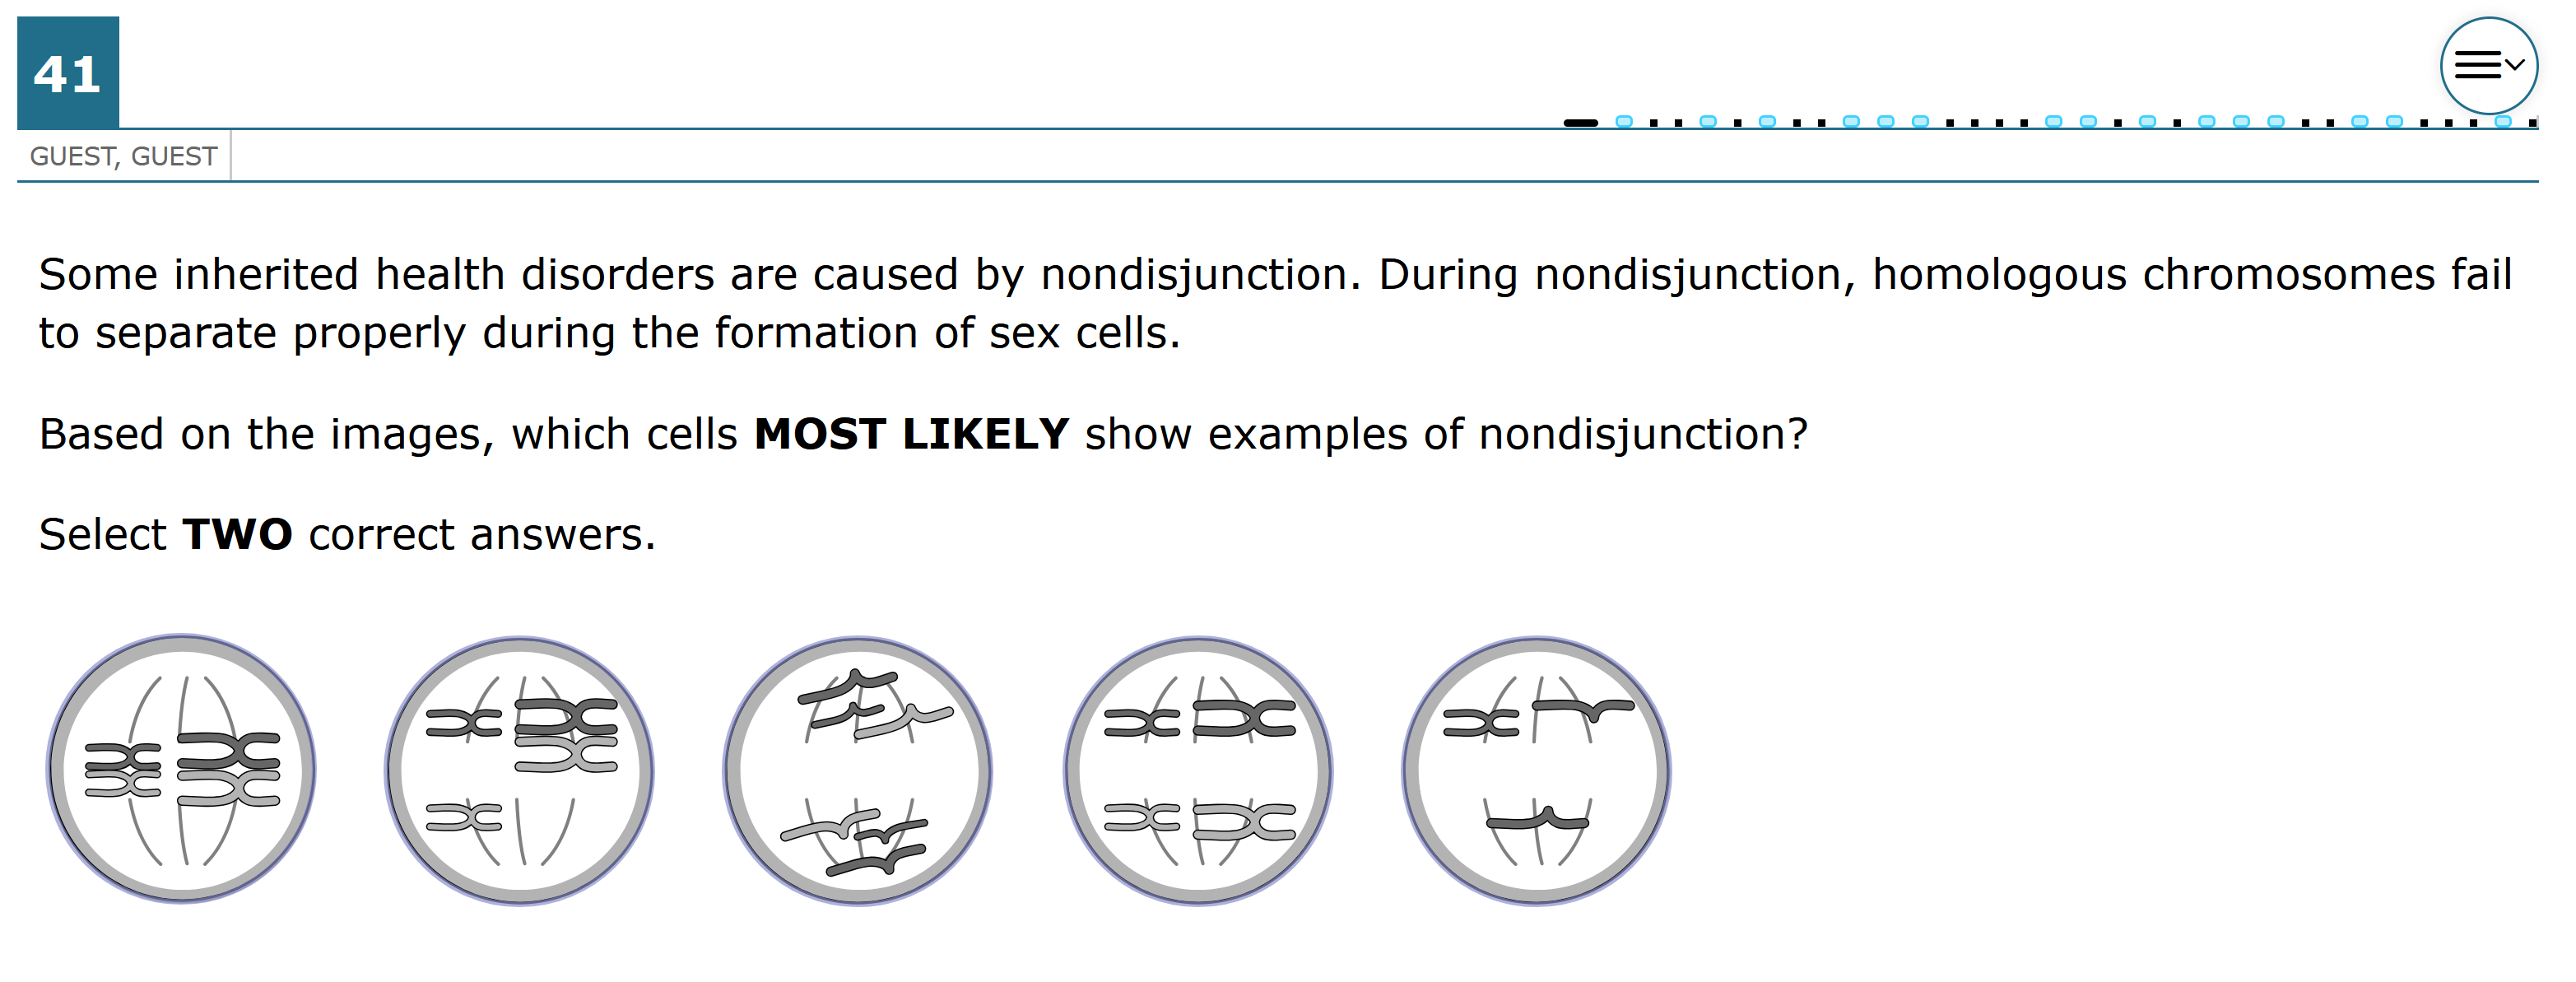


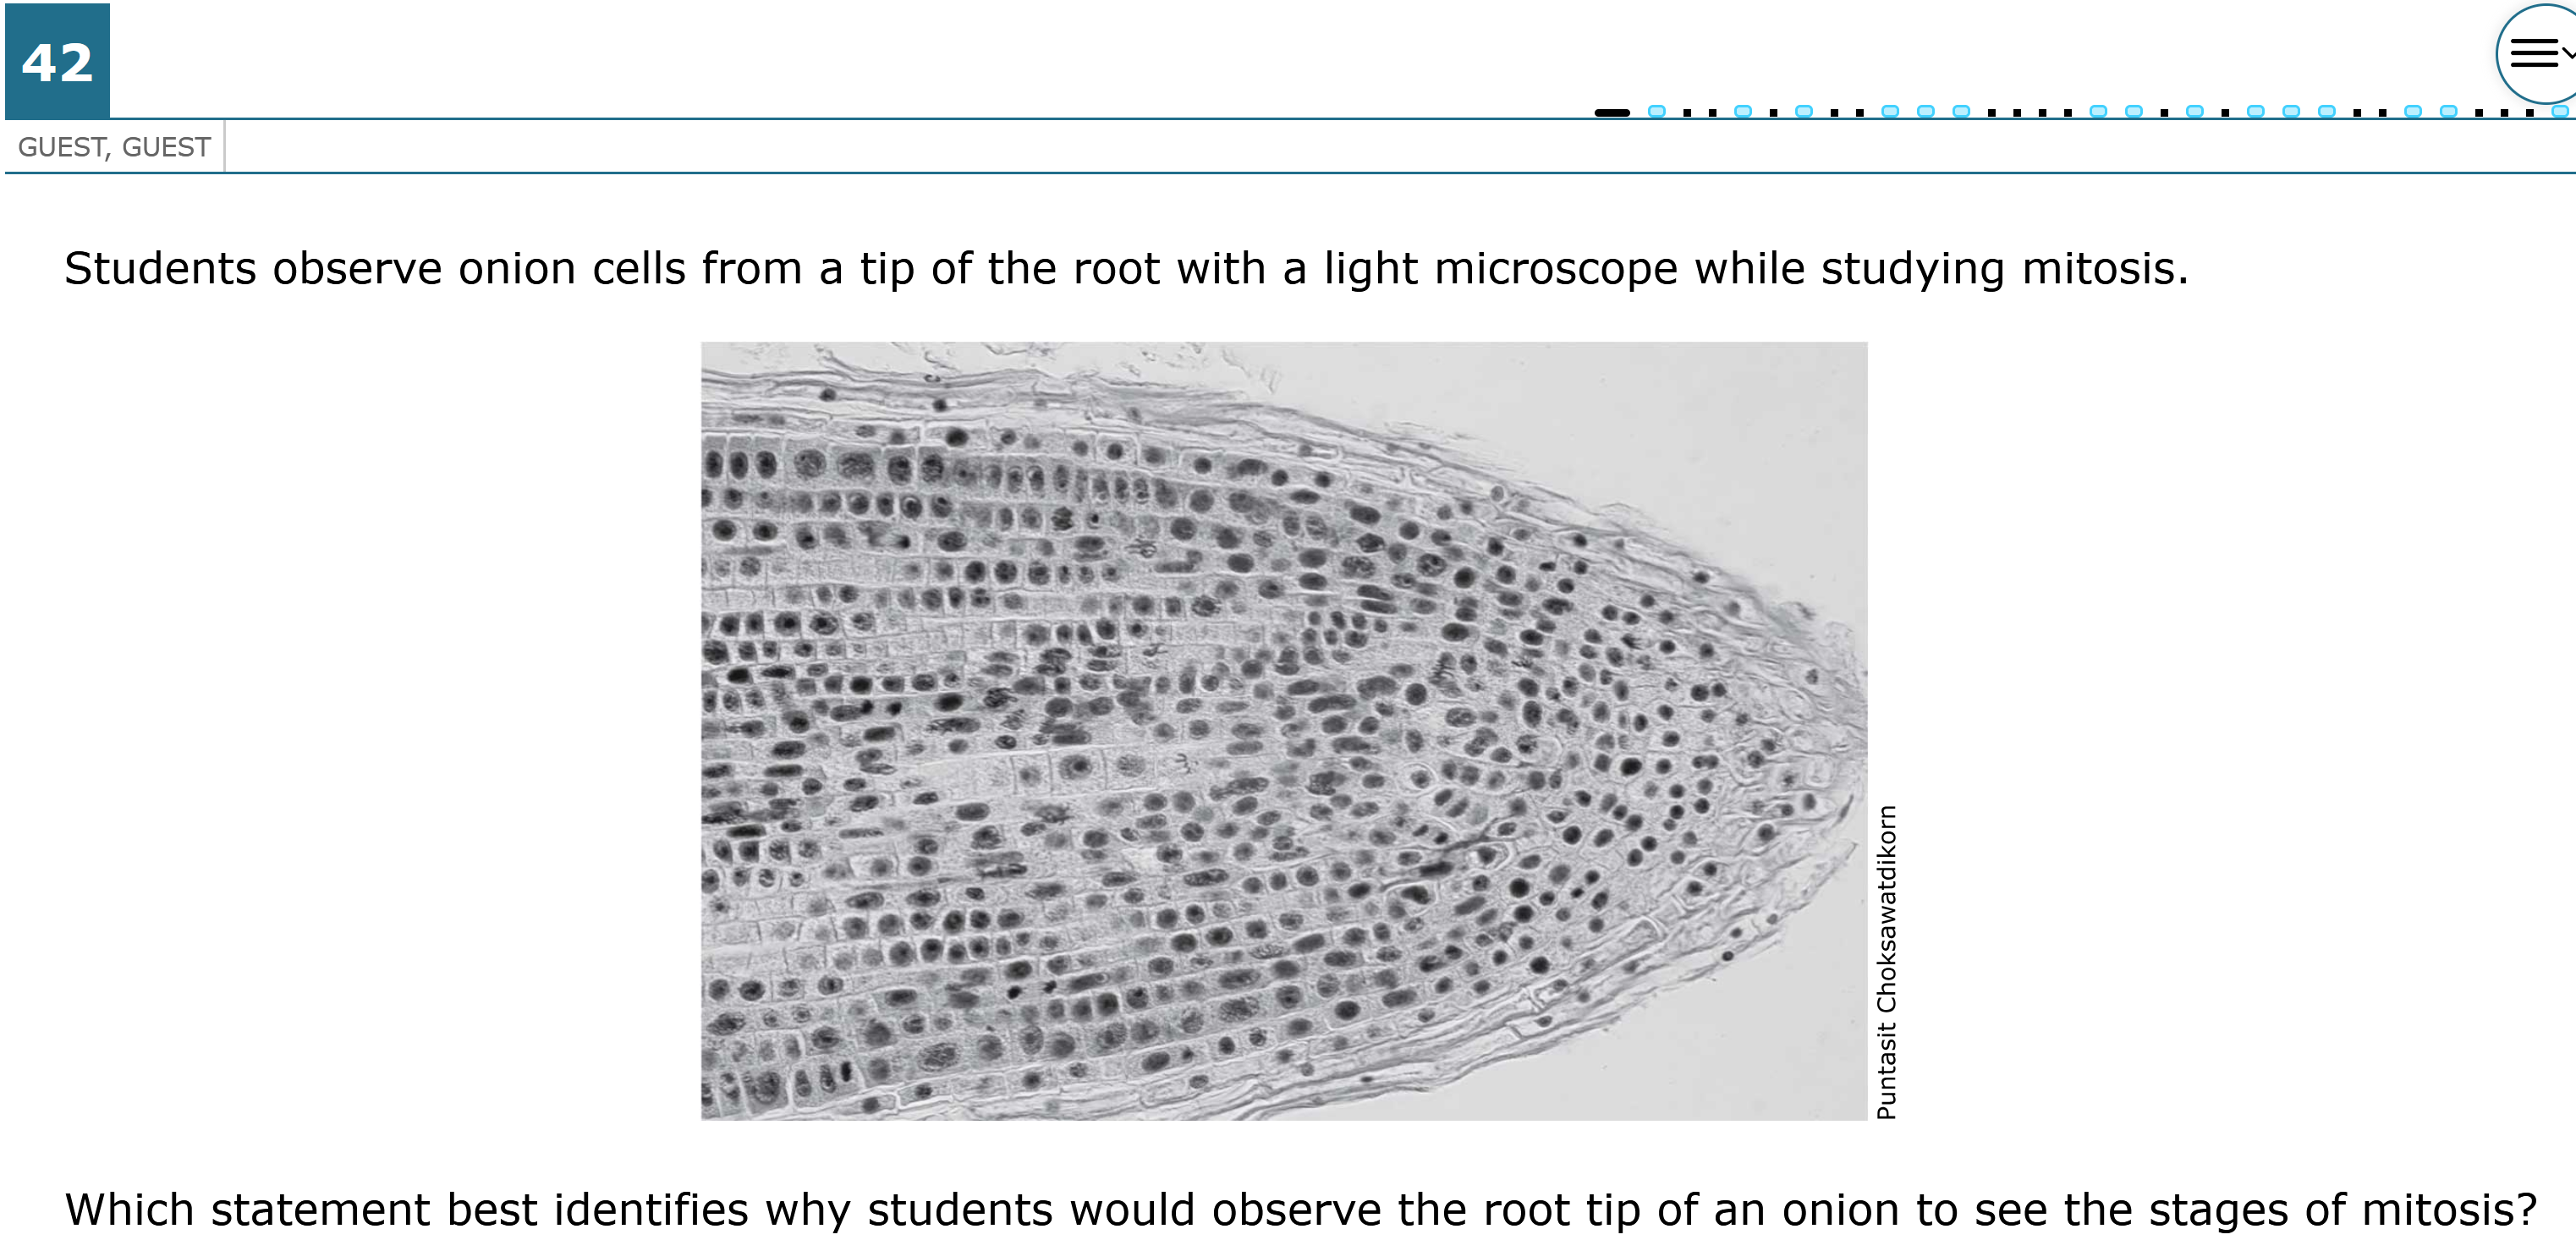


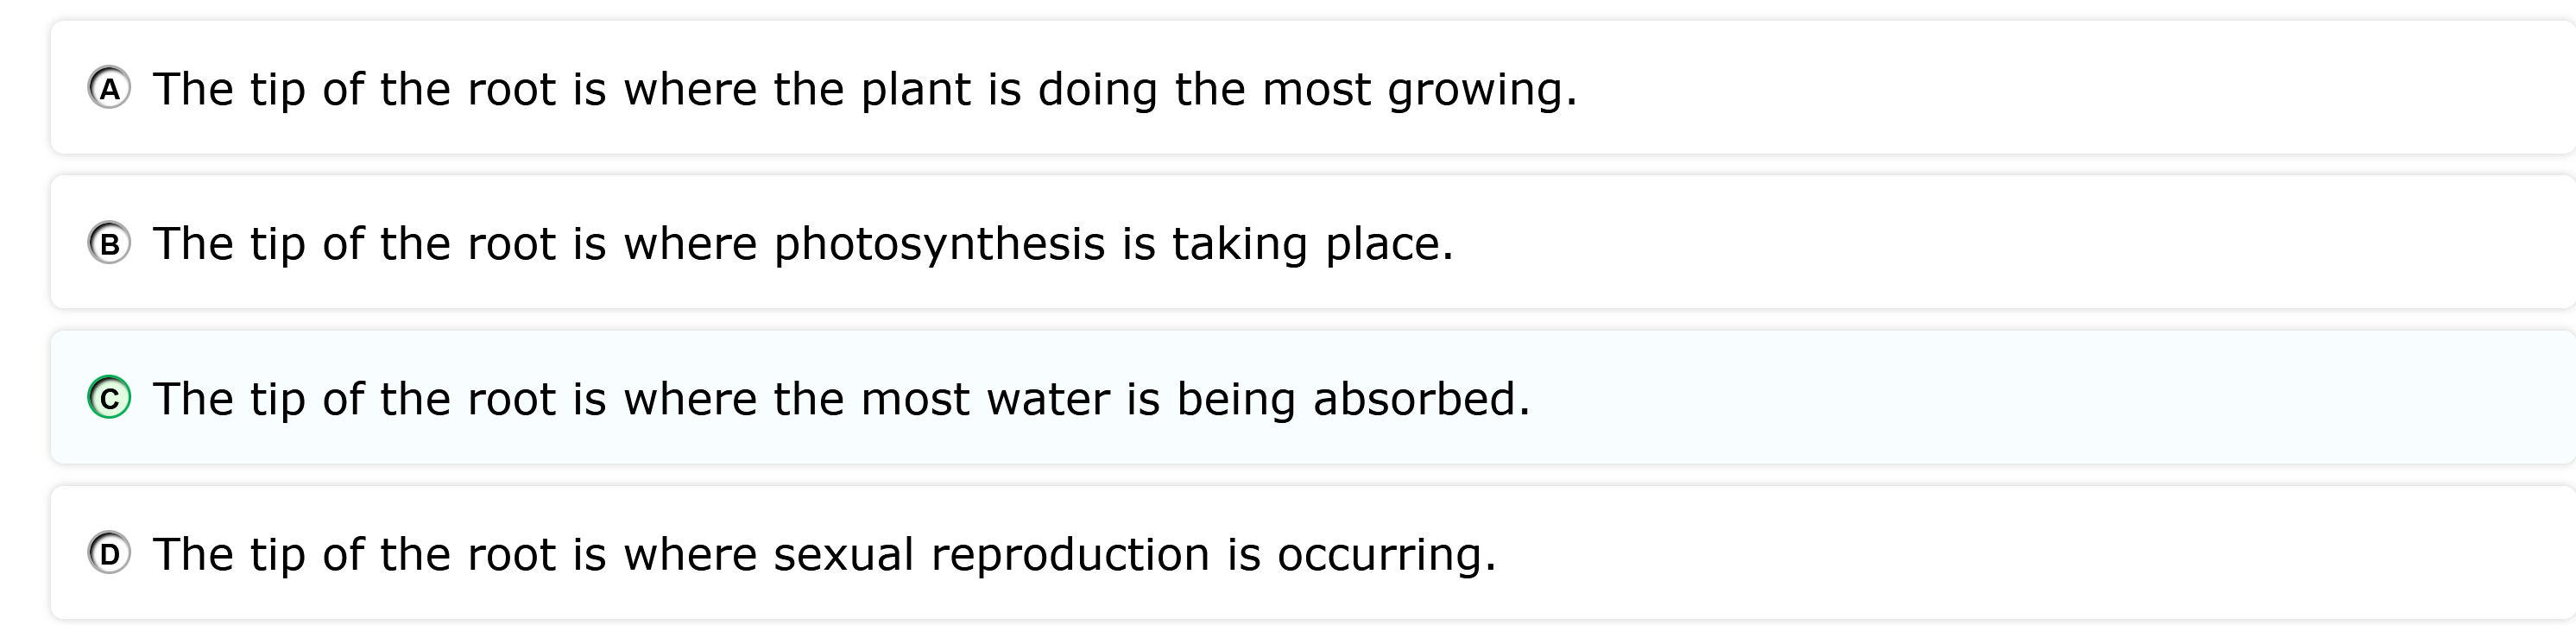


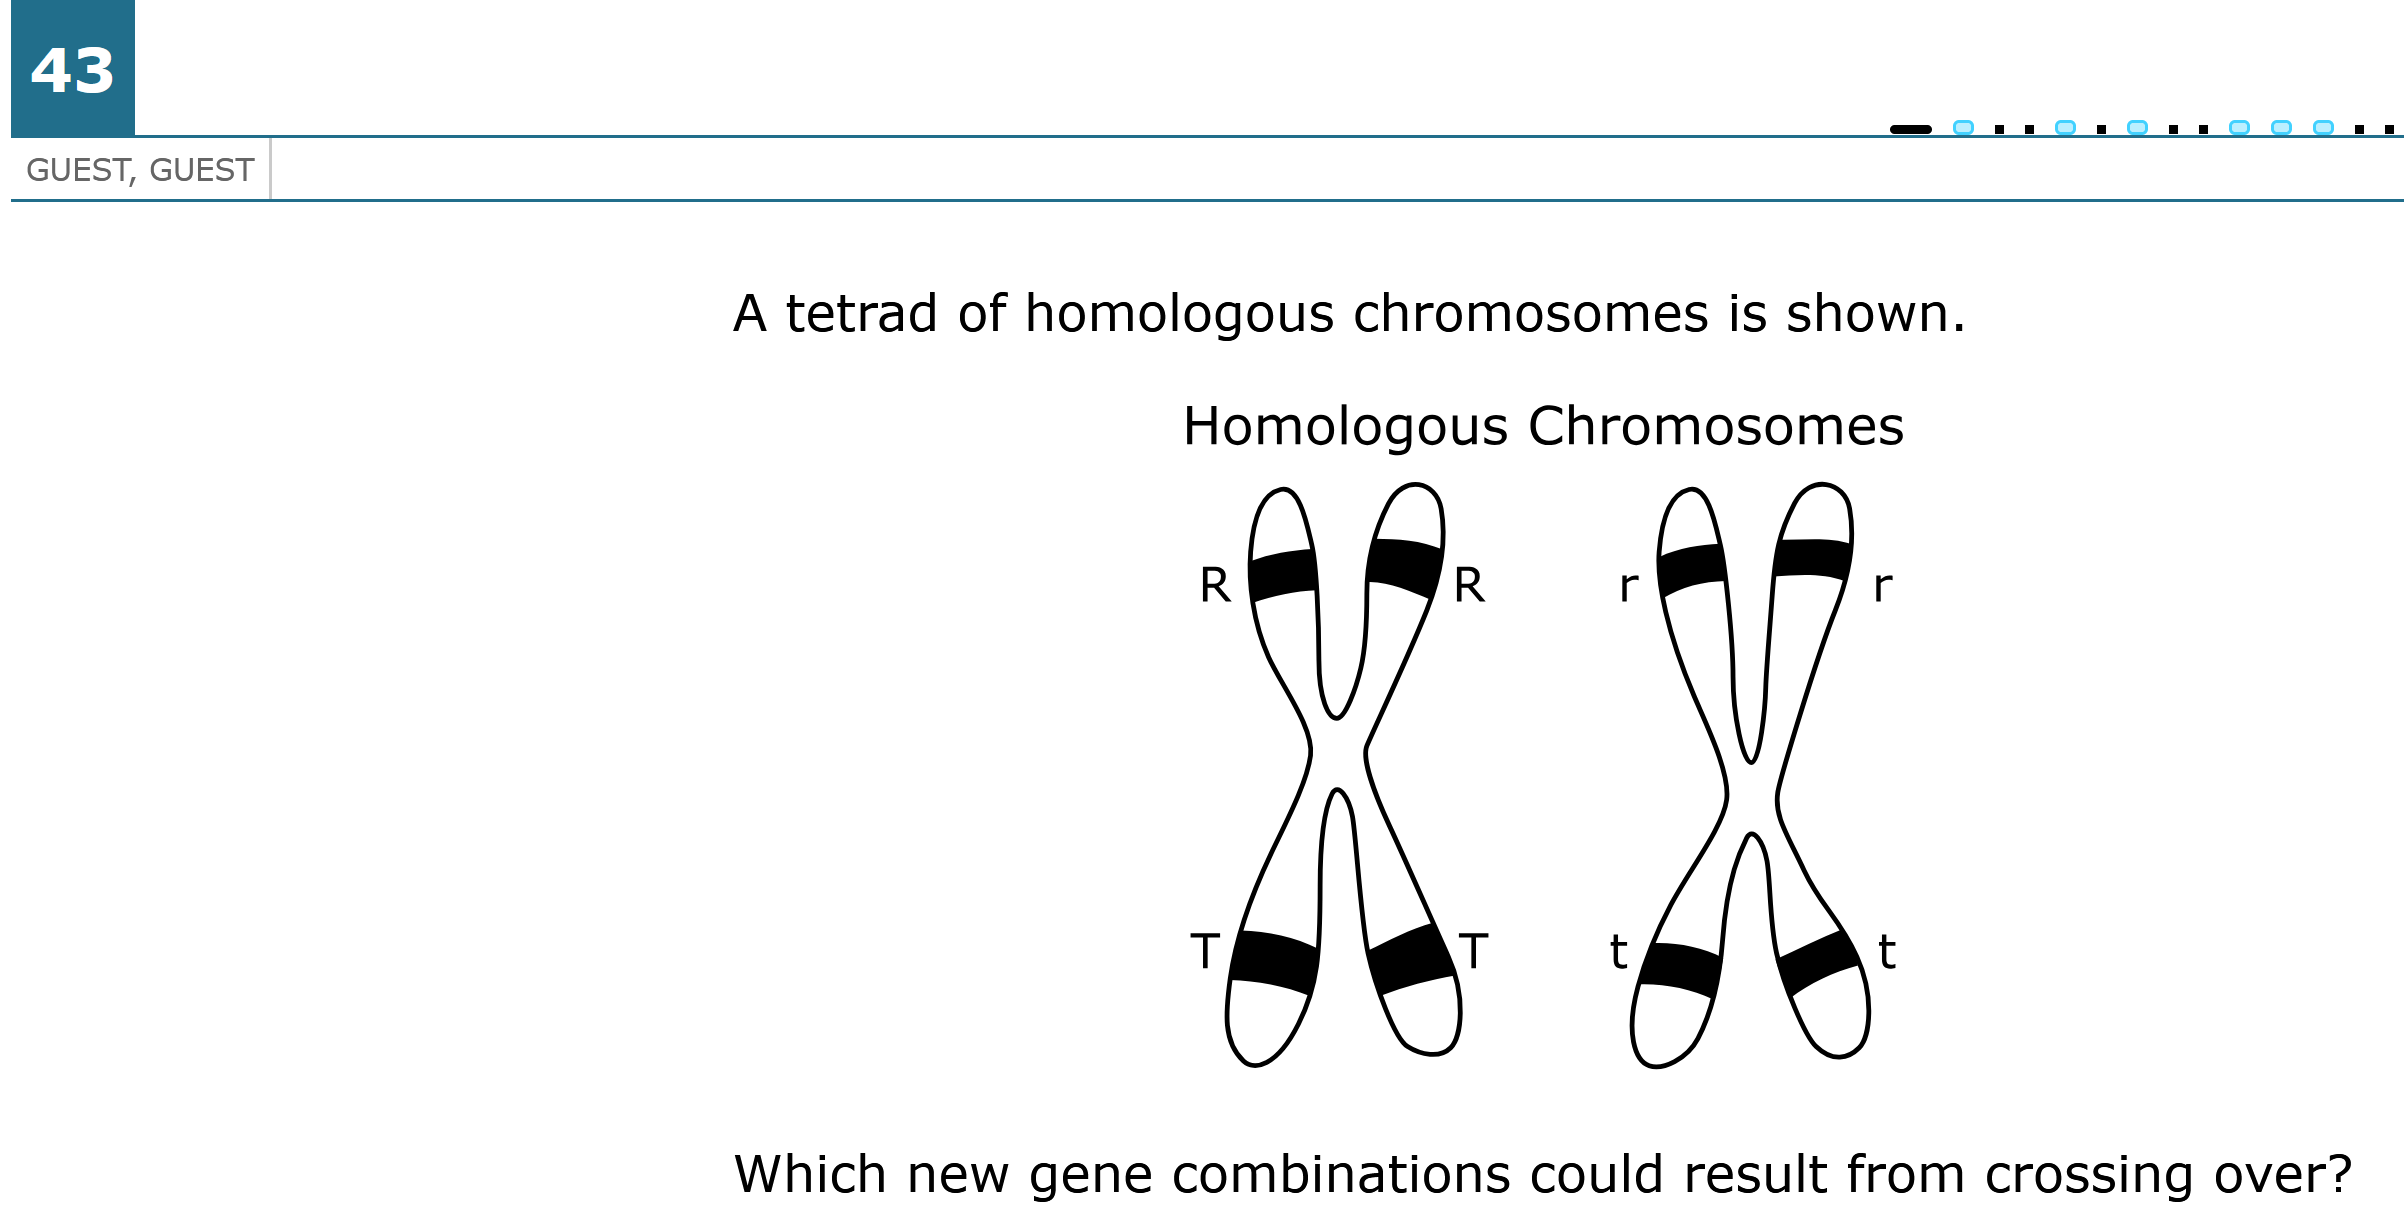


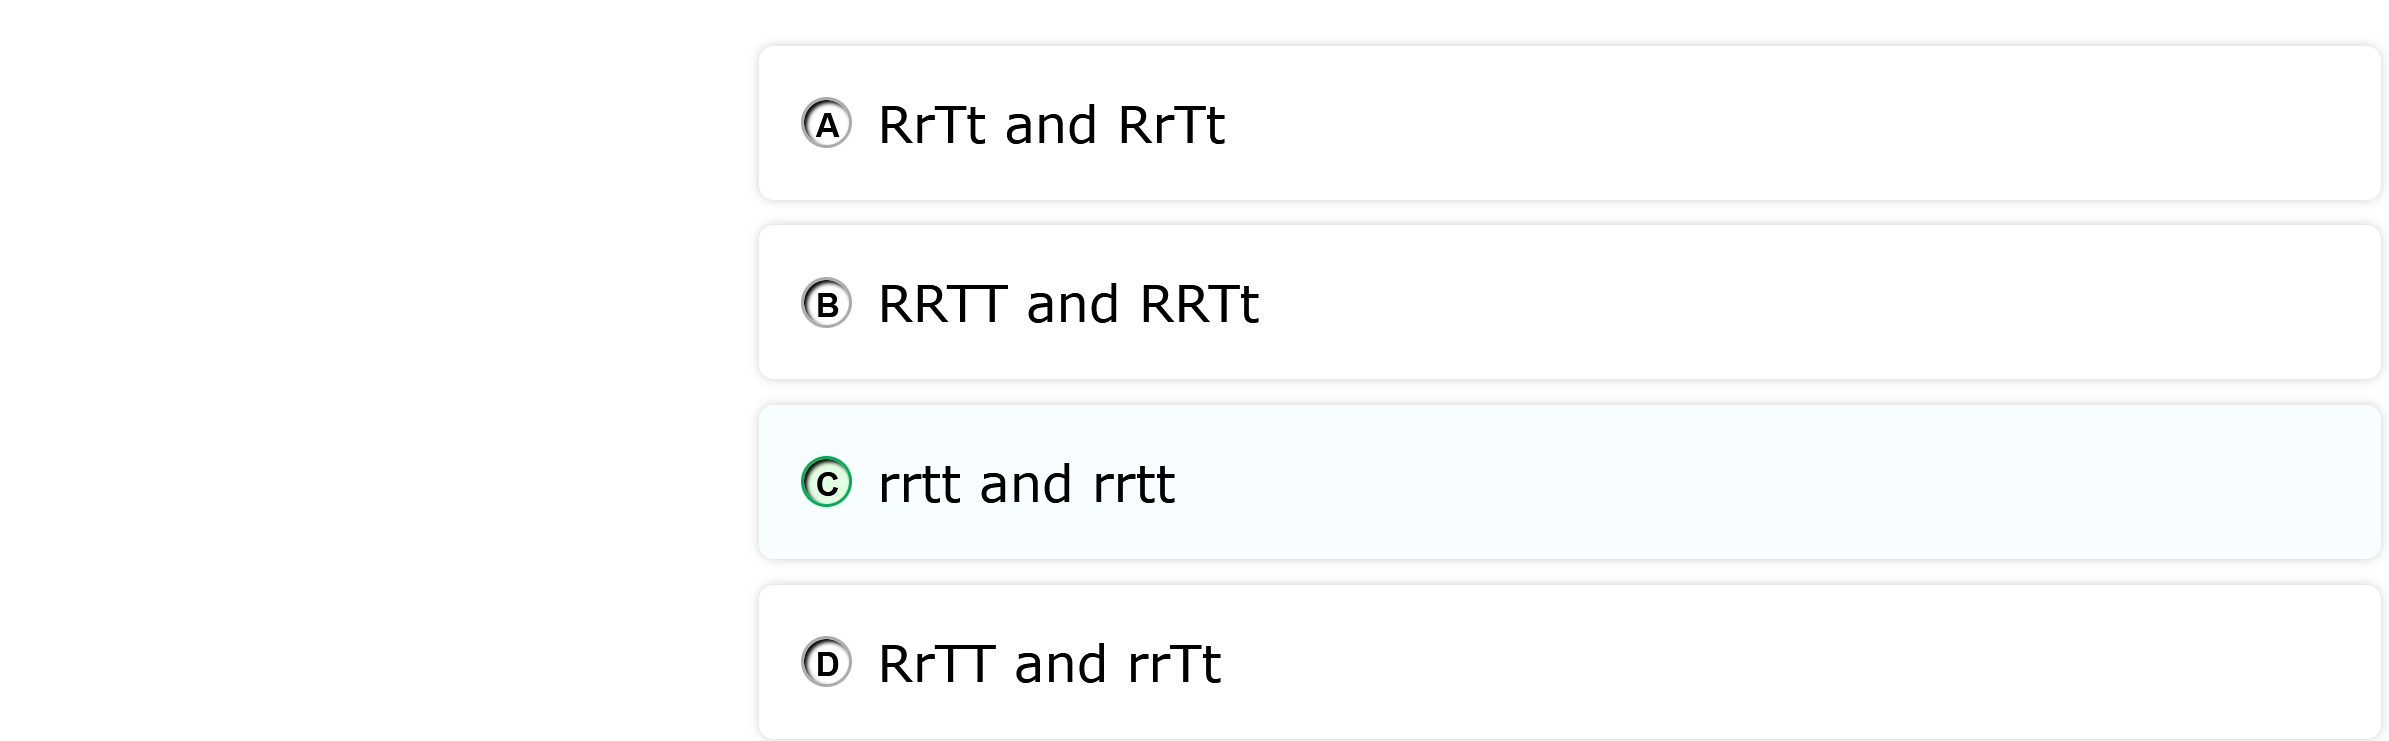


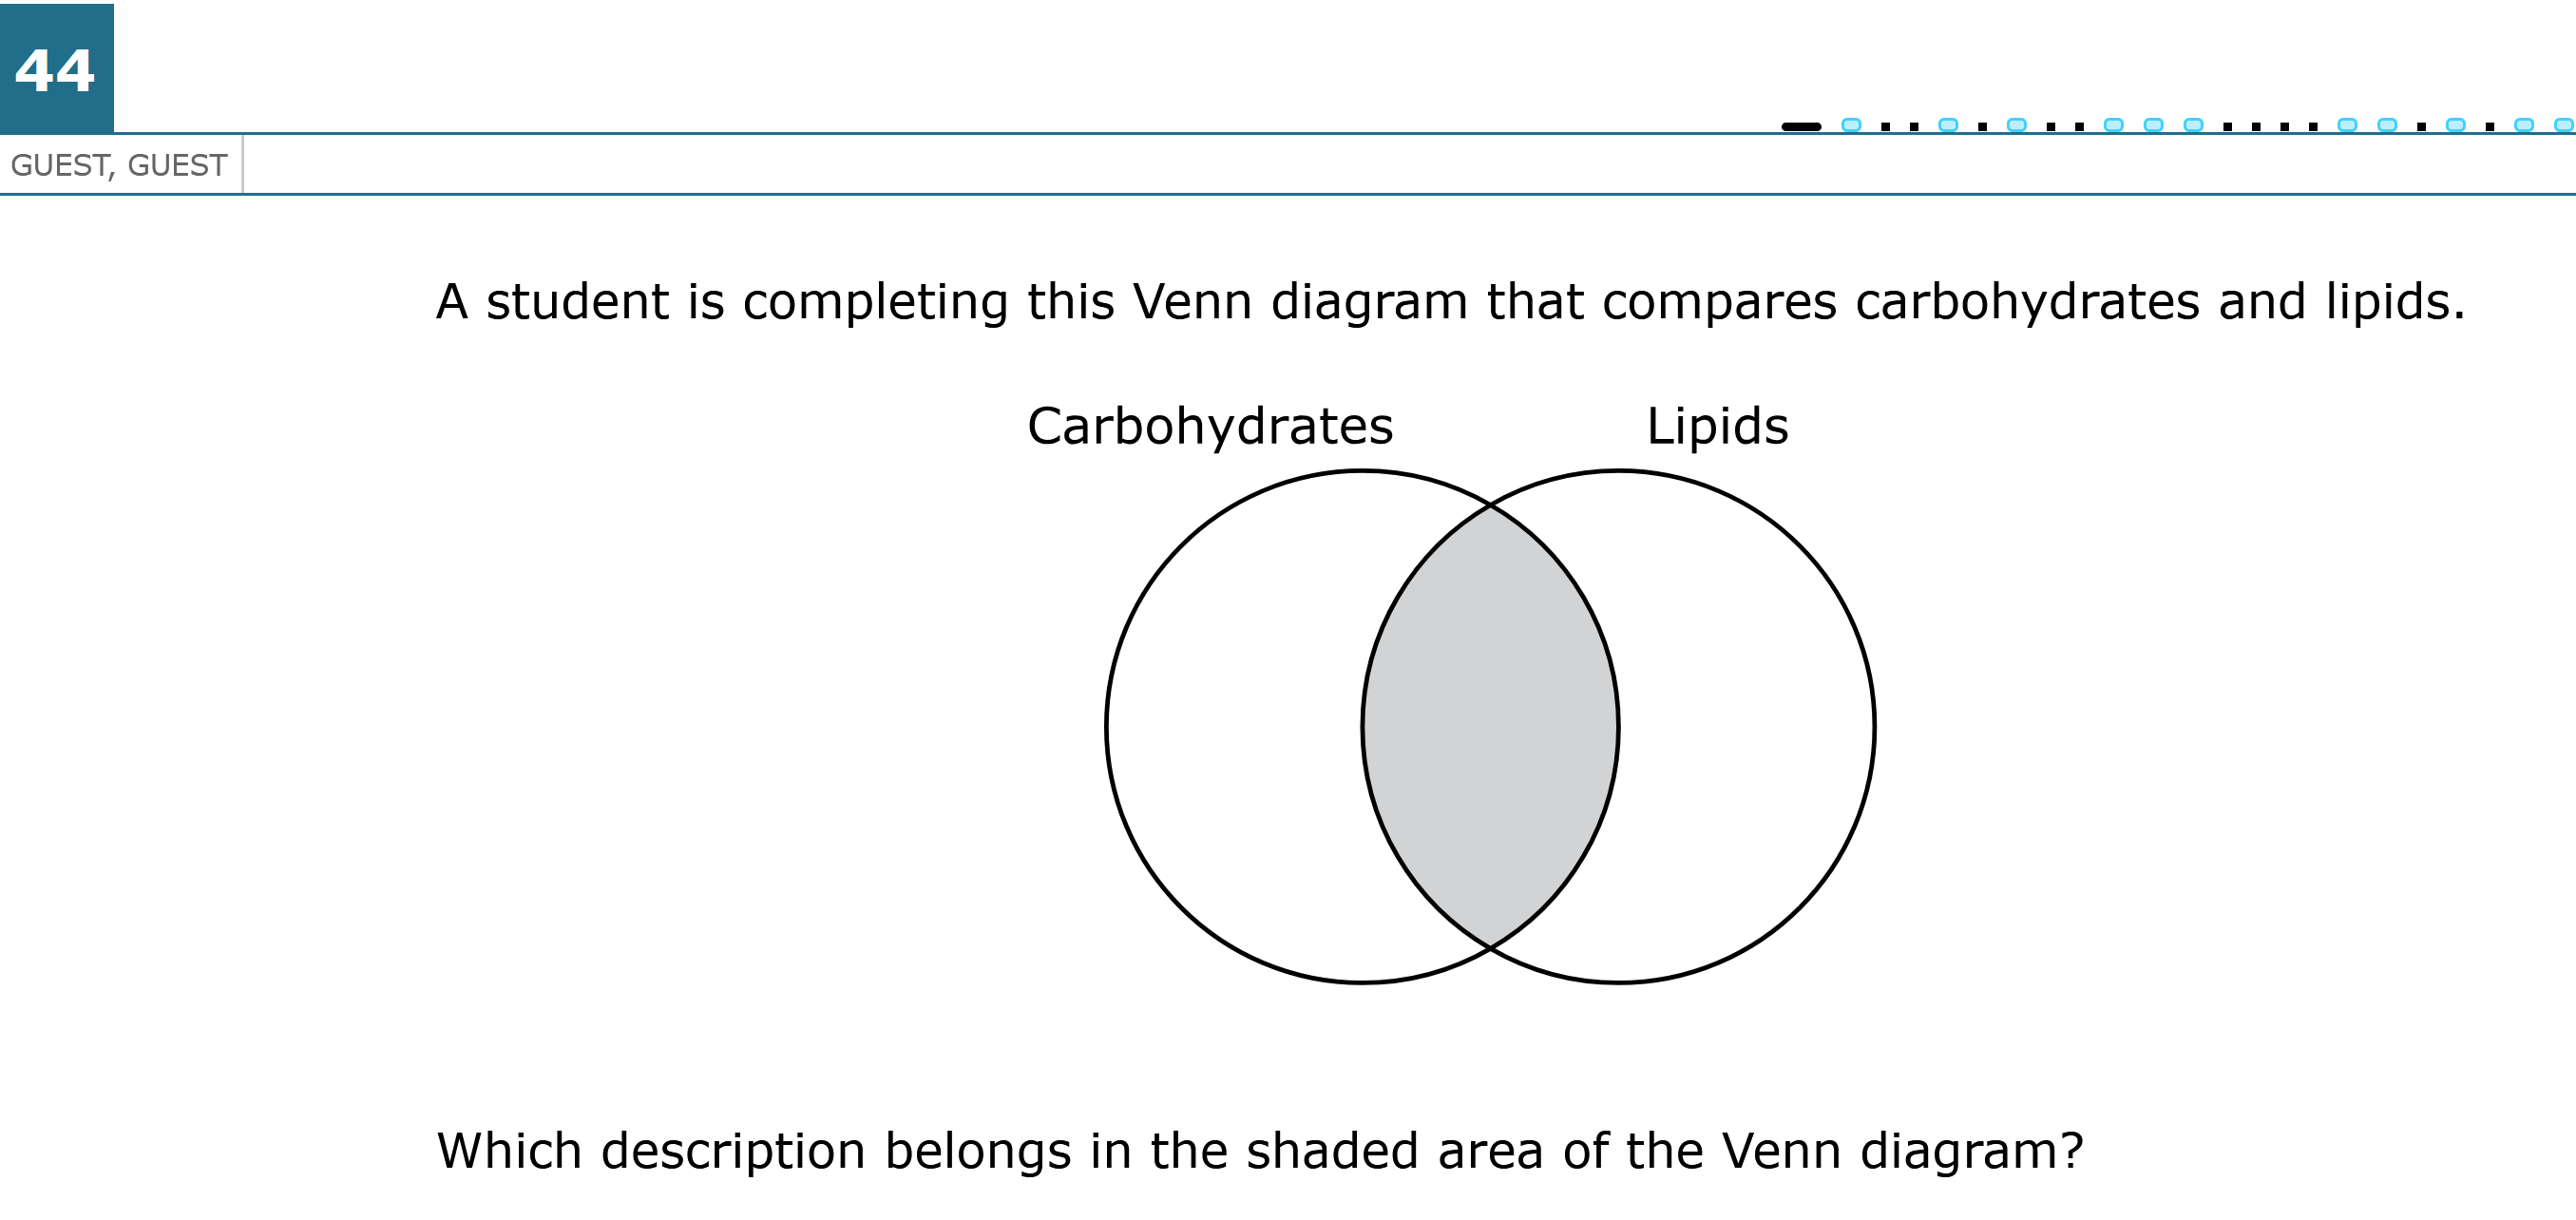


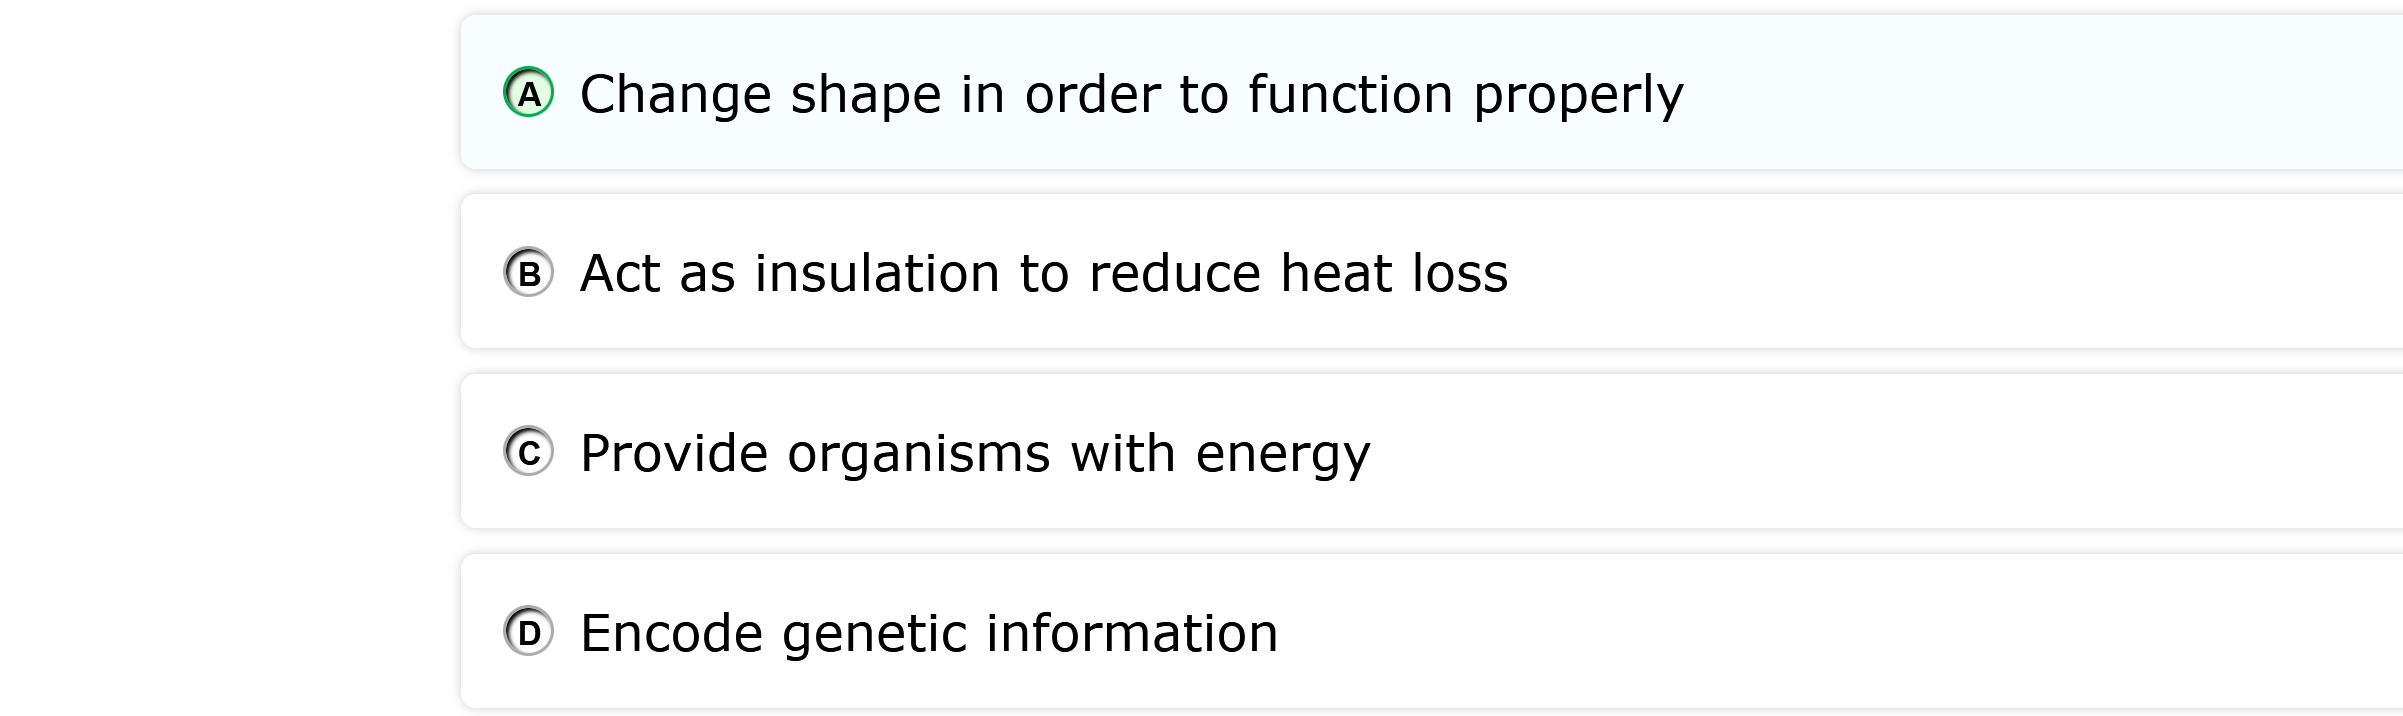


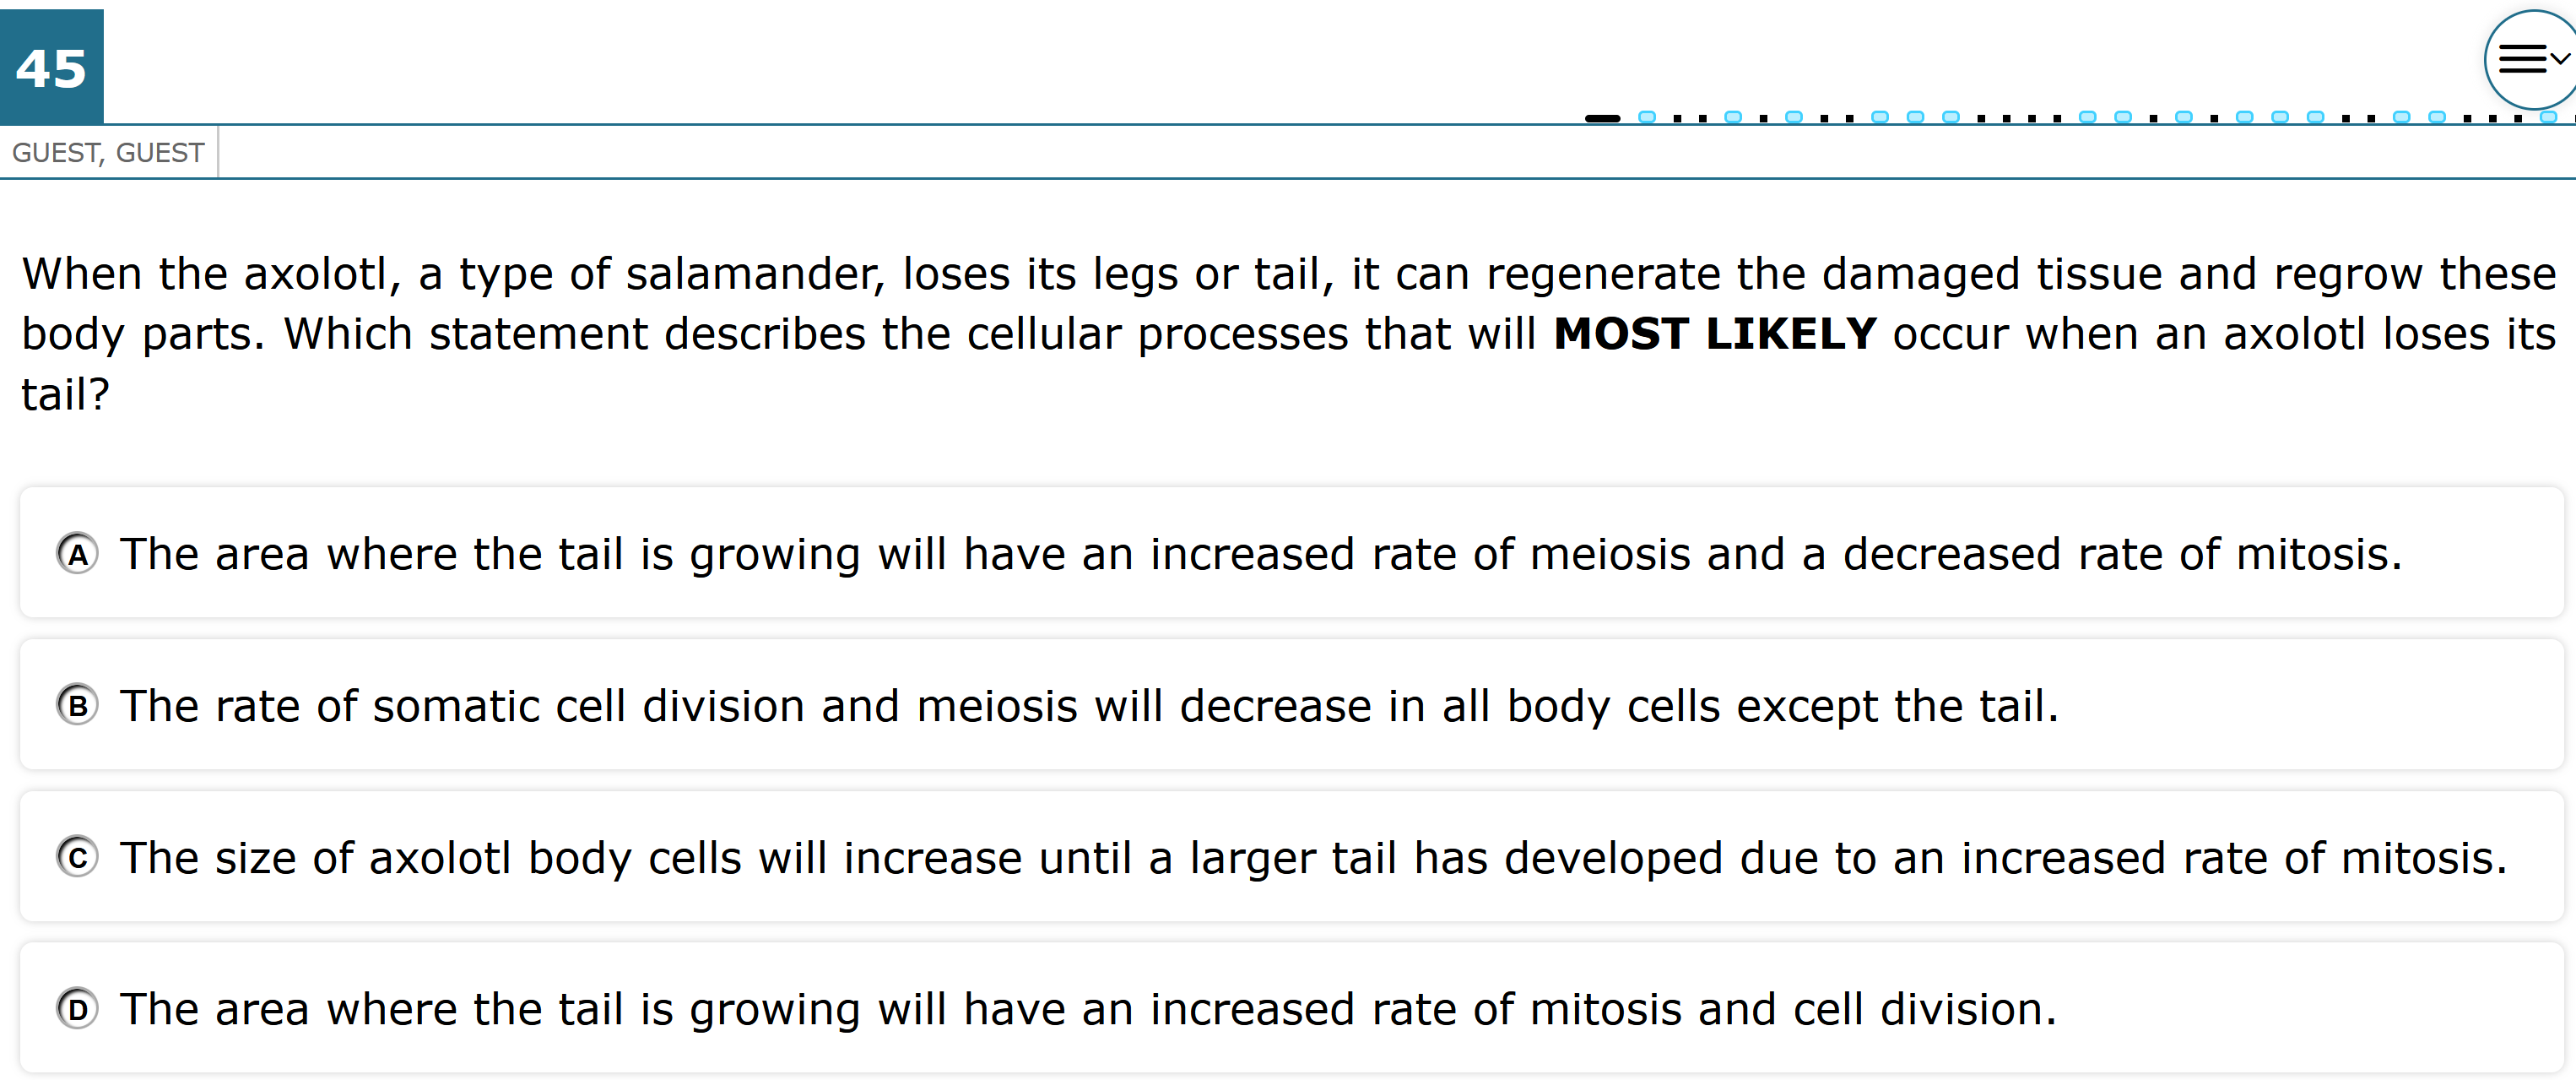

Supplement: Supplementary file 1 [file 5b5d52492aa066a88ca5c90f.docx]
